# Supplementary material for: The HIV latency reversing agent HODHBt inhibits the phosphatases PTPN1 and PTPN2
Source: PubMed Central journal article supplement (PMC11457865; doi:10.1172/jci.insight.179680), 2024-08-08

Full unedited blot for Figure 1C  
PTPN1

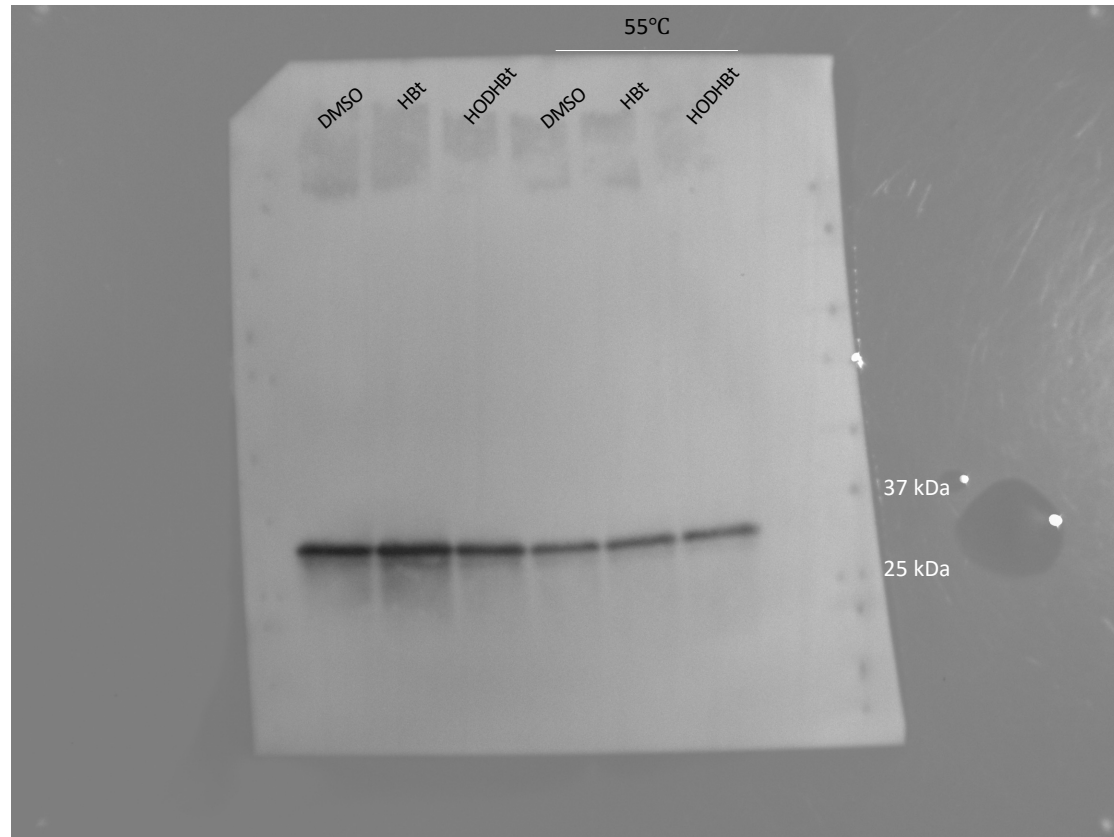

Full unedited blot for Figure 1C  
PTPN2

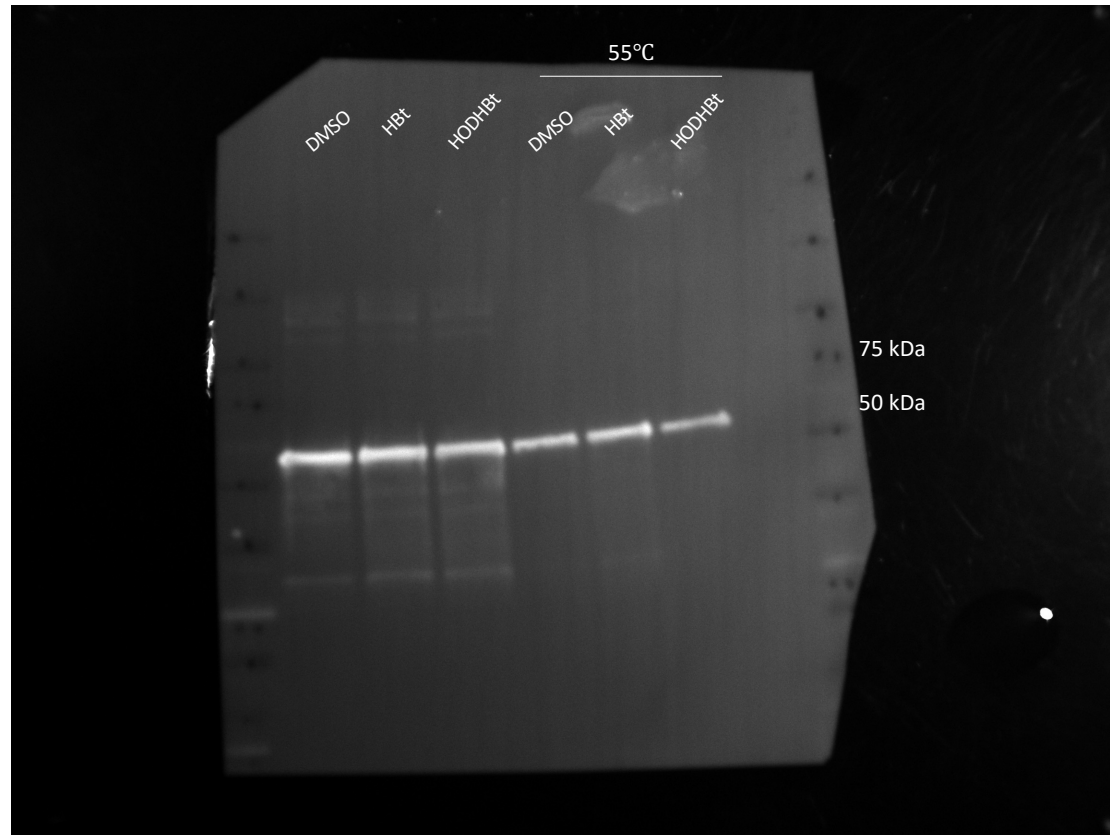

Full unedited blot for Figure 3A  
pSTAT1

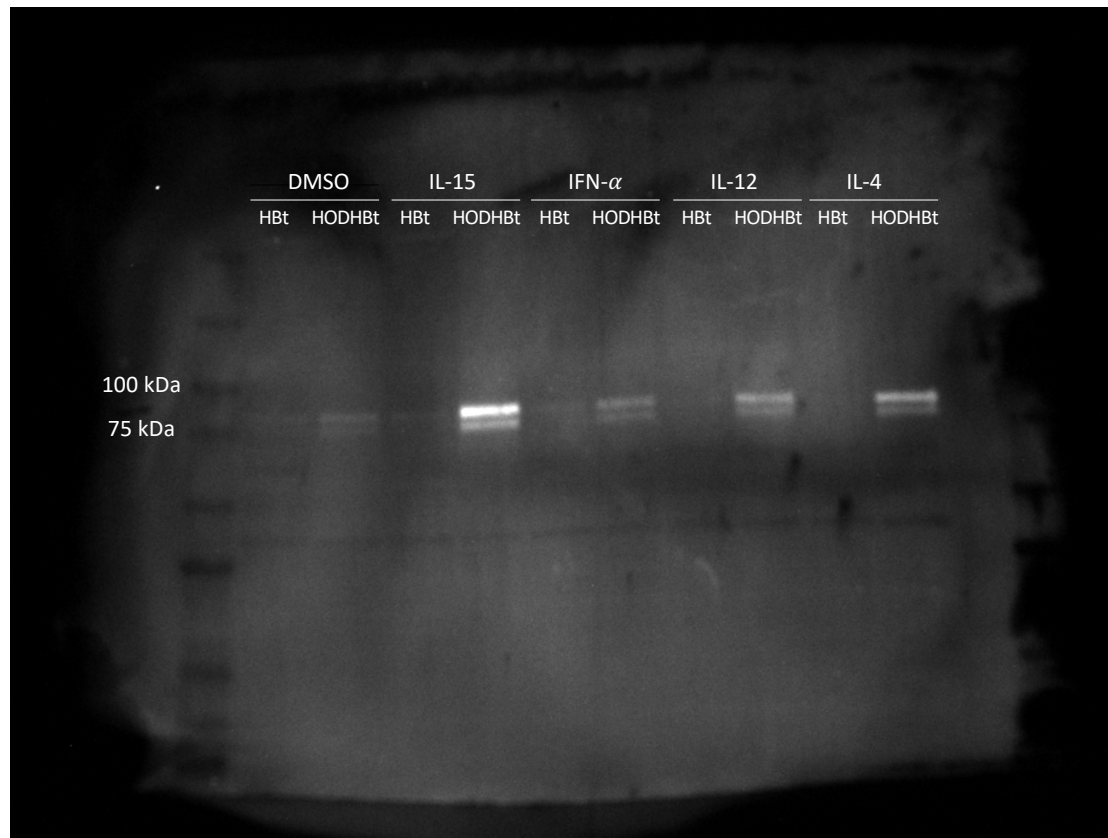

Full unedited blot for Figure 3A  
pSTAT1 actin

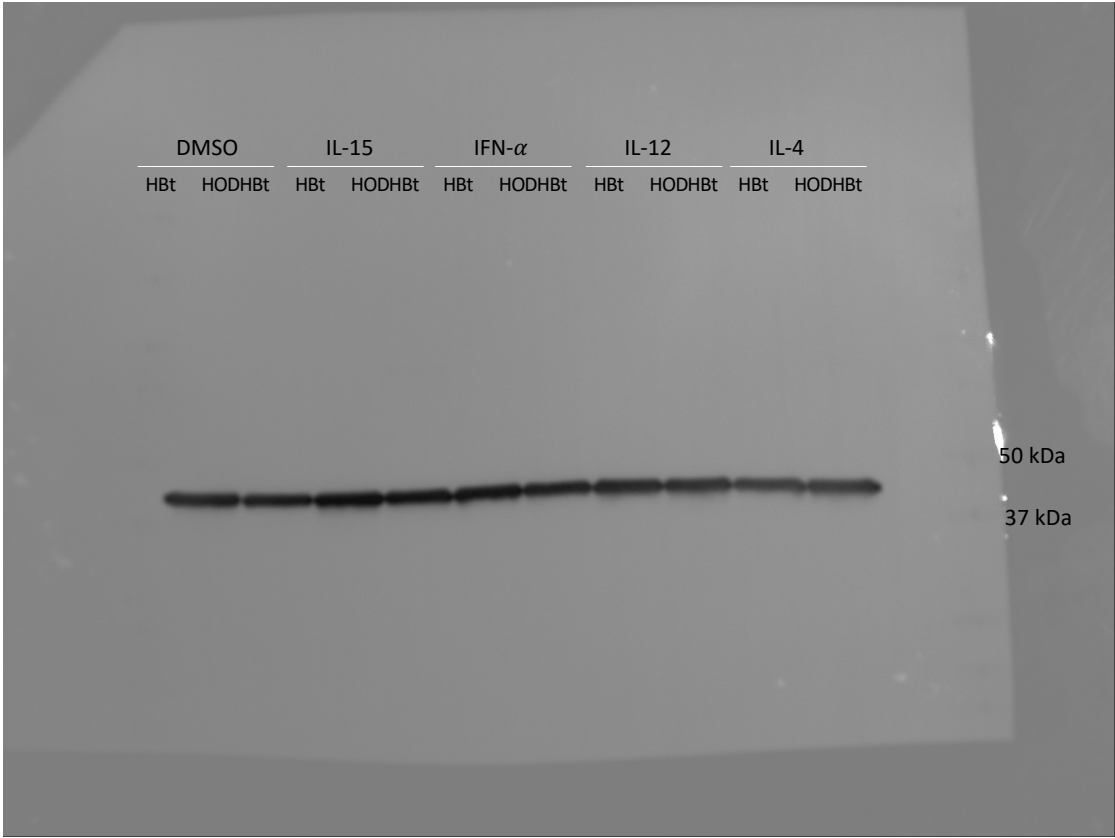

Full unedited blot for Figure 3A  
STAT1

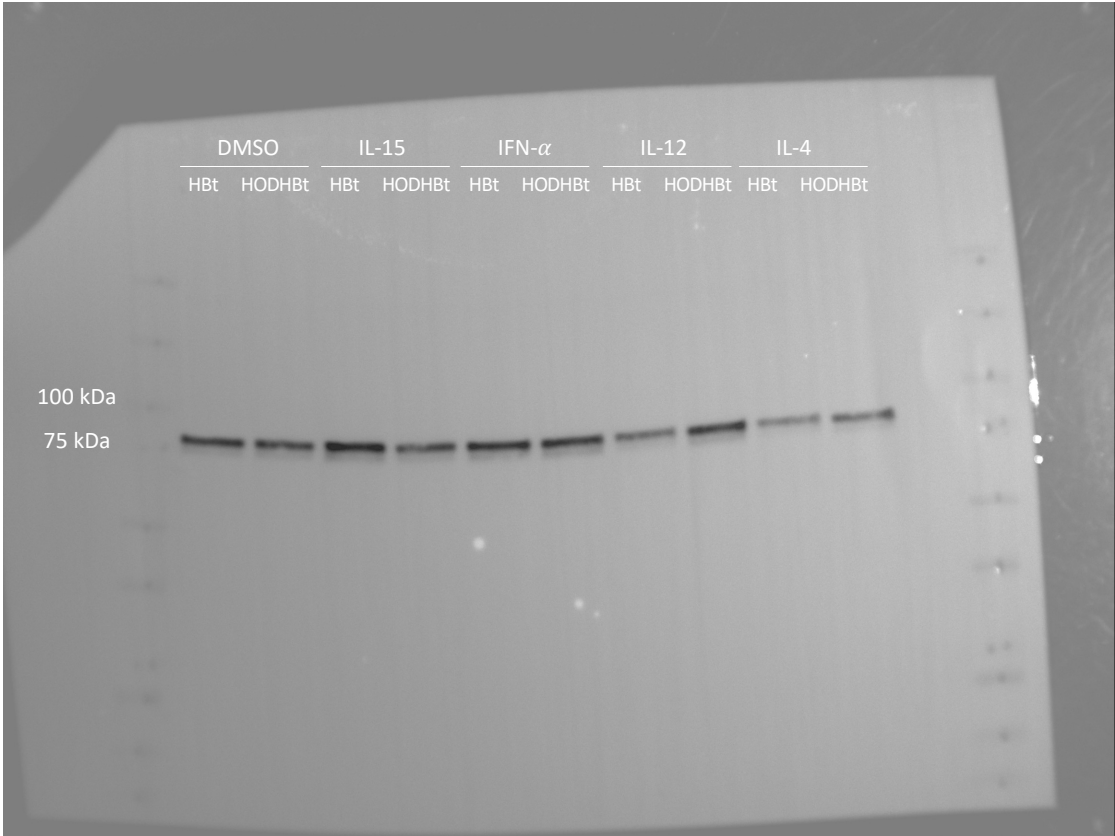

Full unedited blot for Figure 3A  
STAT1 actin

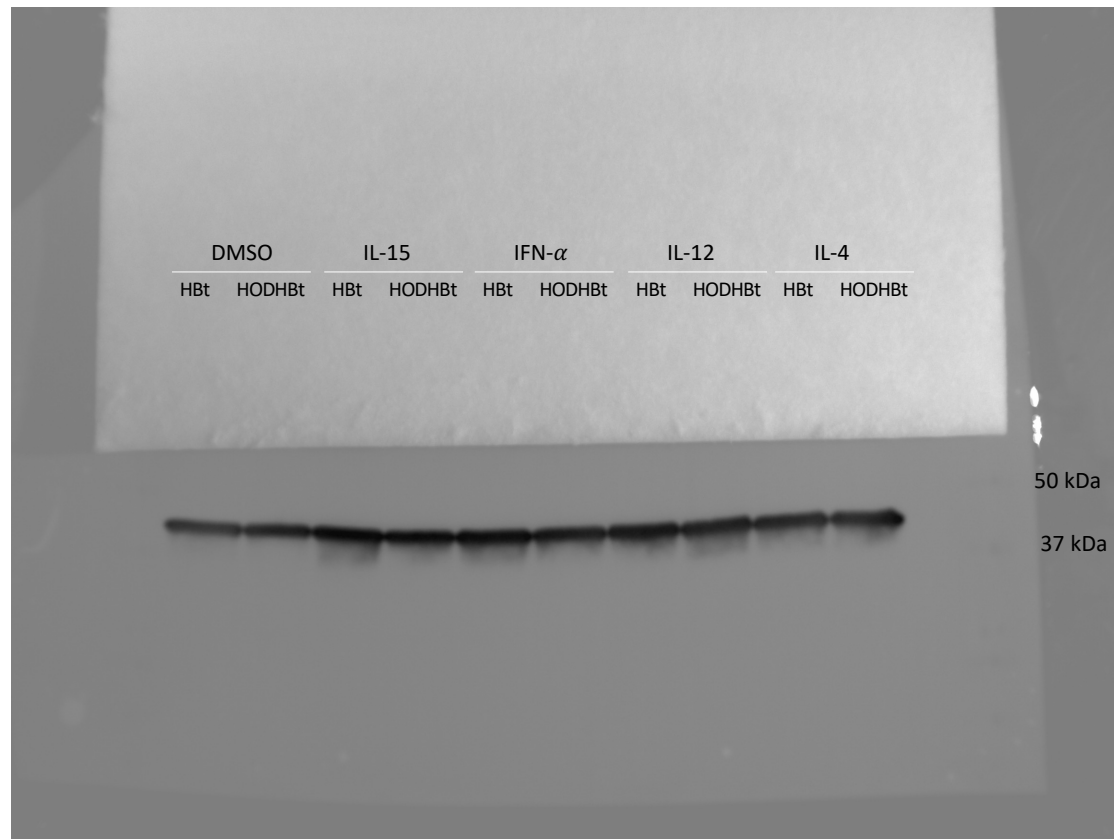

Full unedited blot for Figure 3A  
pSTAT3

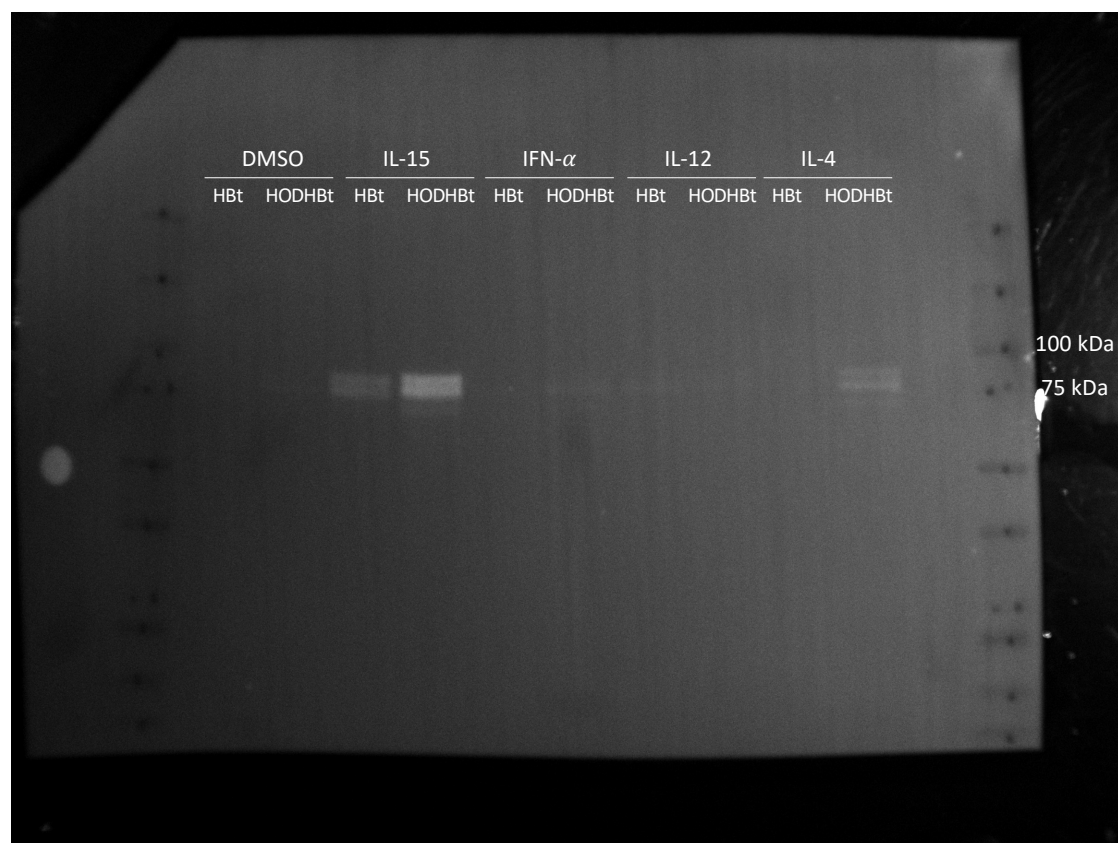

Full unedited blot for Figure 3A  
pSTAT3 actin

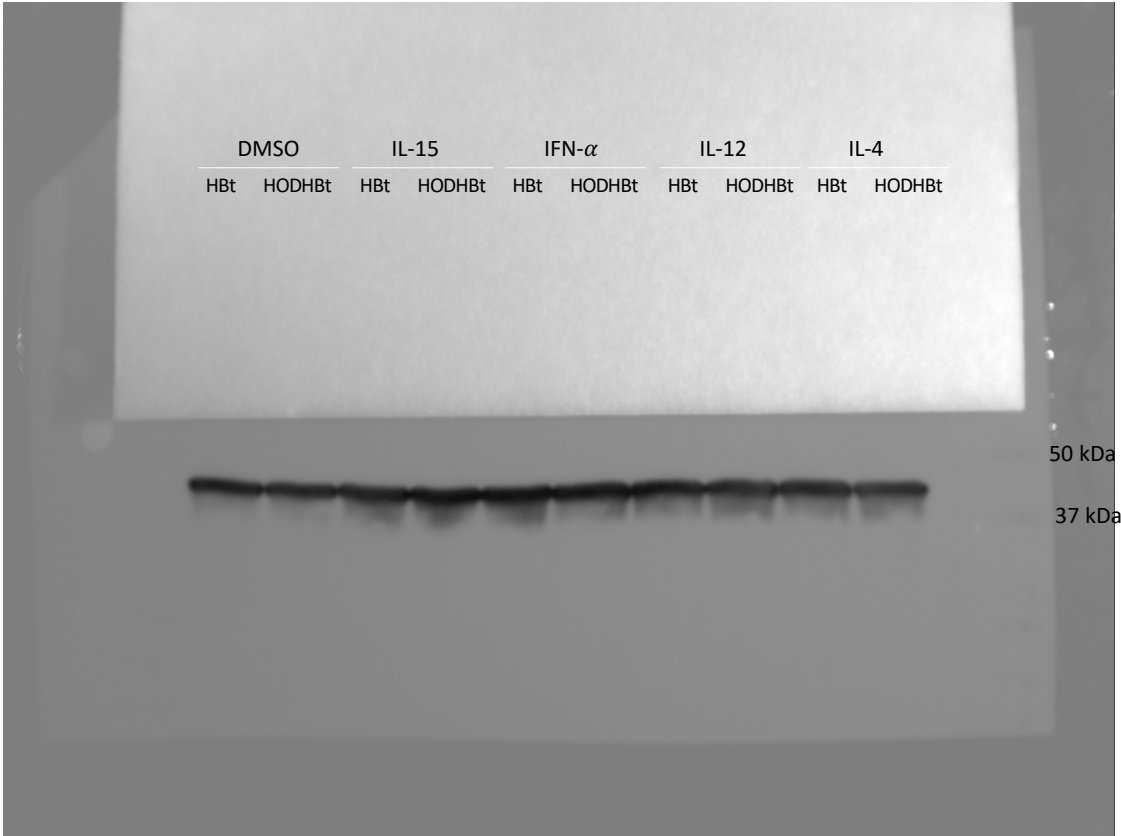



Full unedited blot for Figure 3A  
STAT3

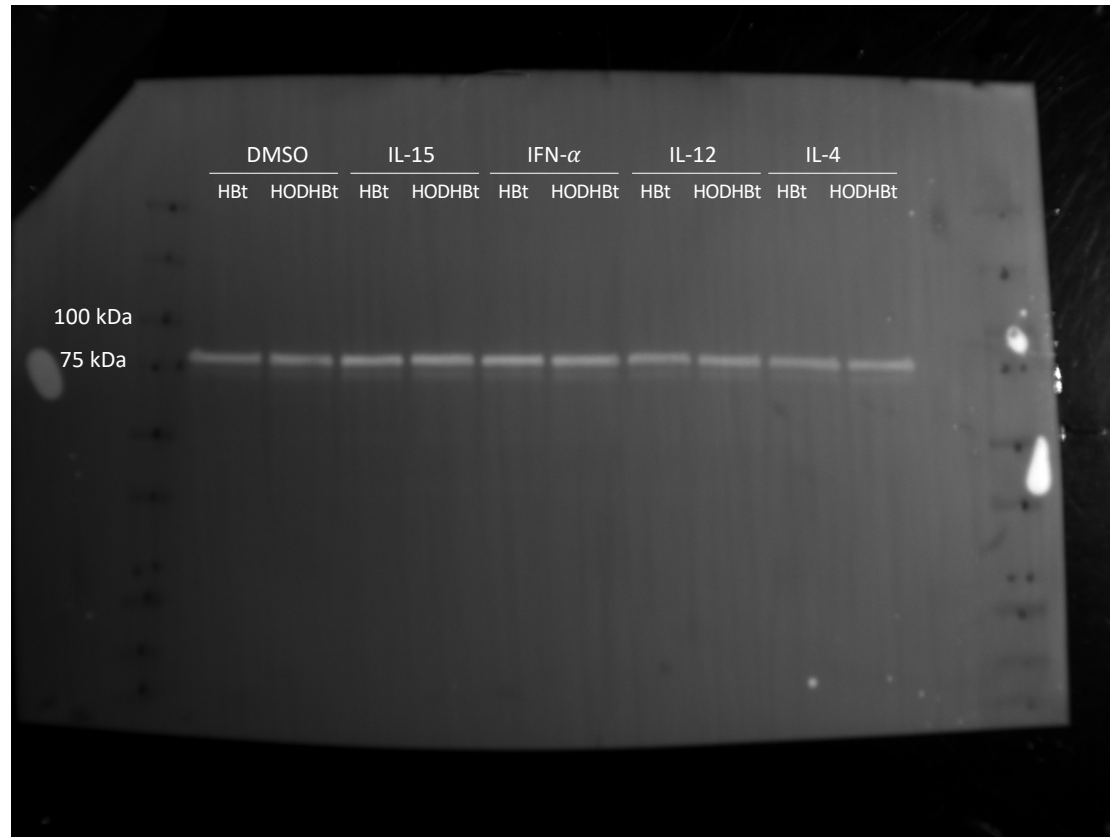

Full unedited blot for Figure 3A  
STAT3 actin

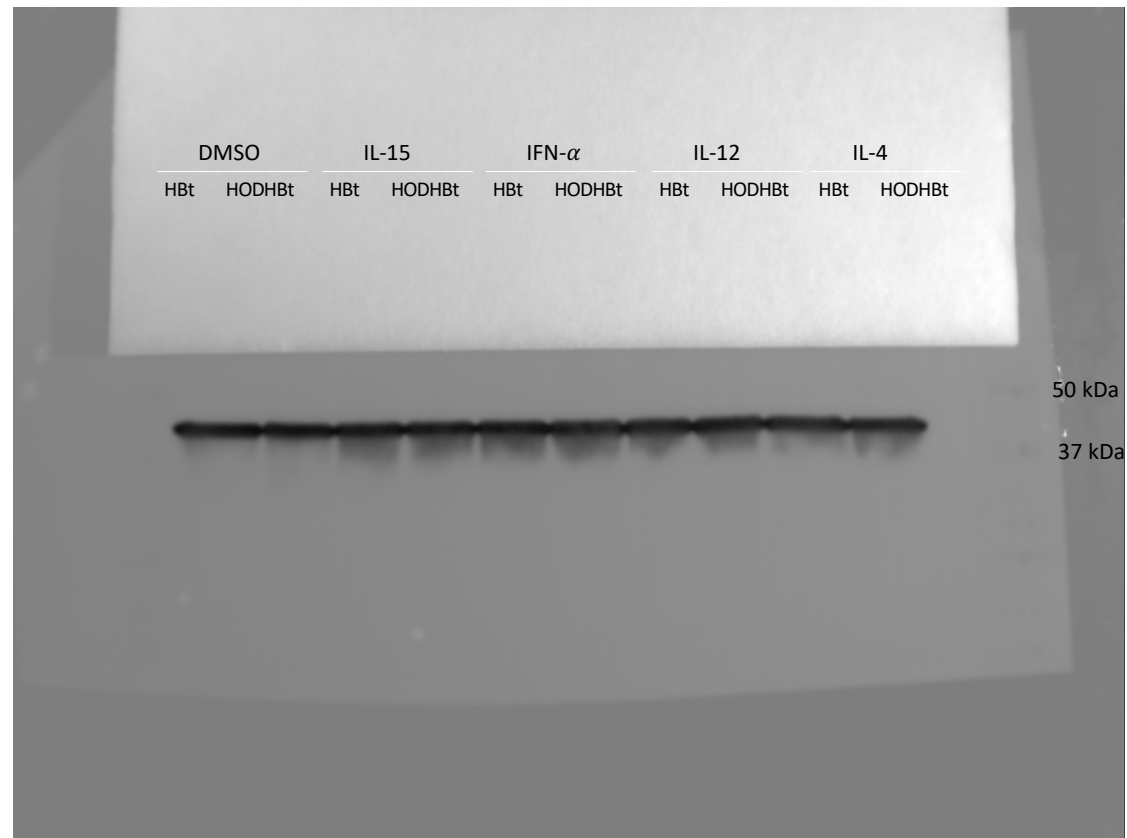

Full unedited blot for Figure 3A  
pSTAT5

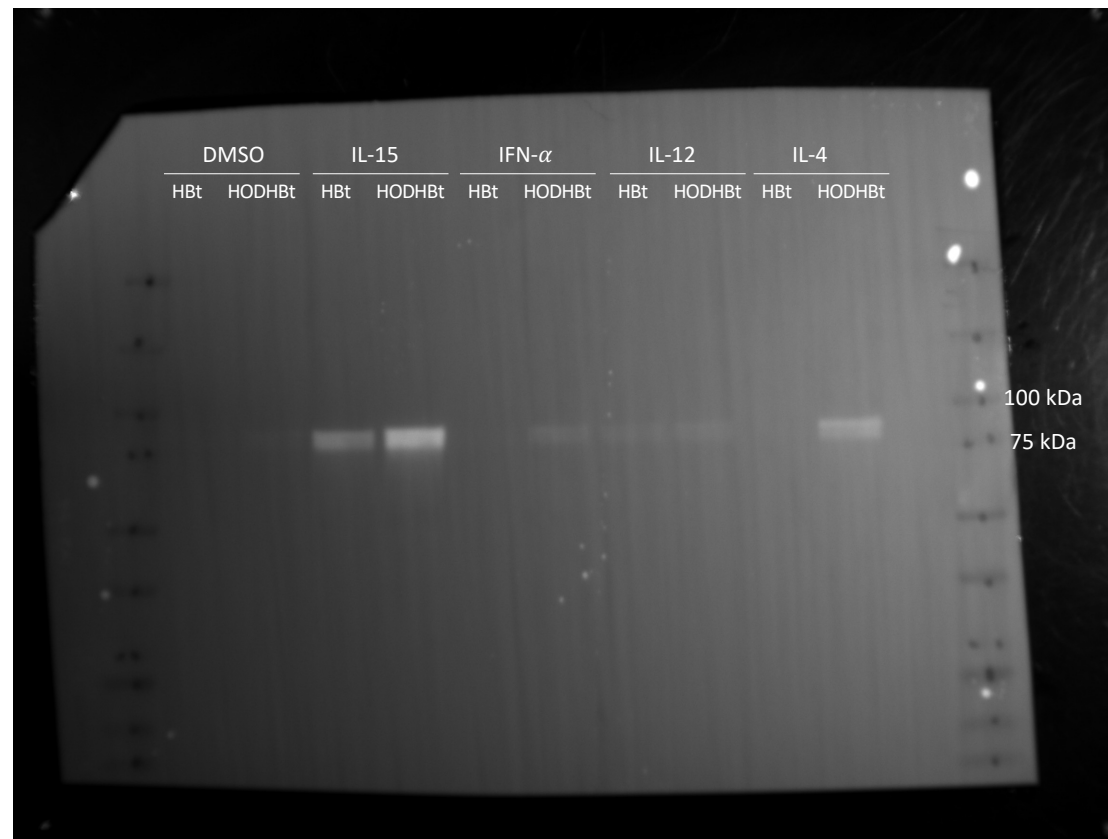

Full unedited blot for Figure 3A  
pSTAT5 actin

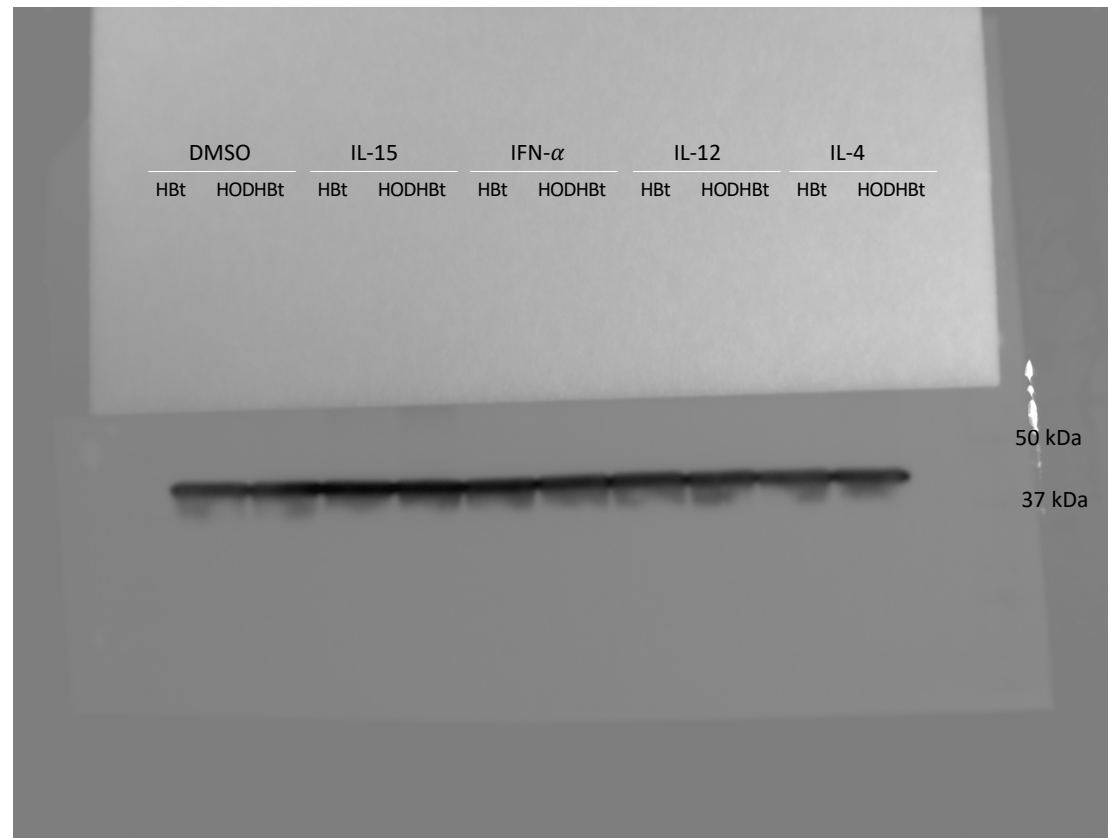

Full unedited blot for Figure 3A  
STAT5

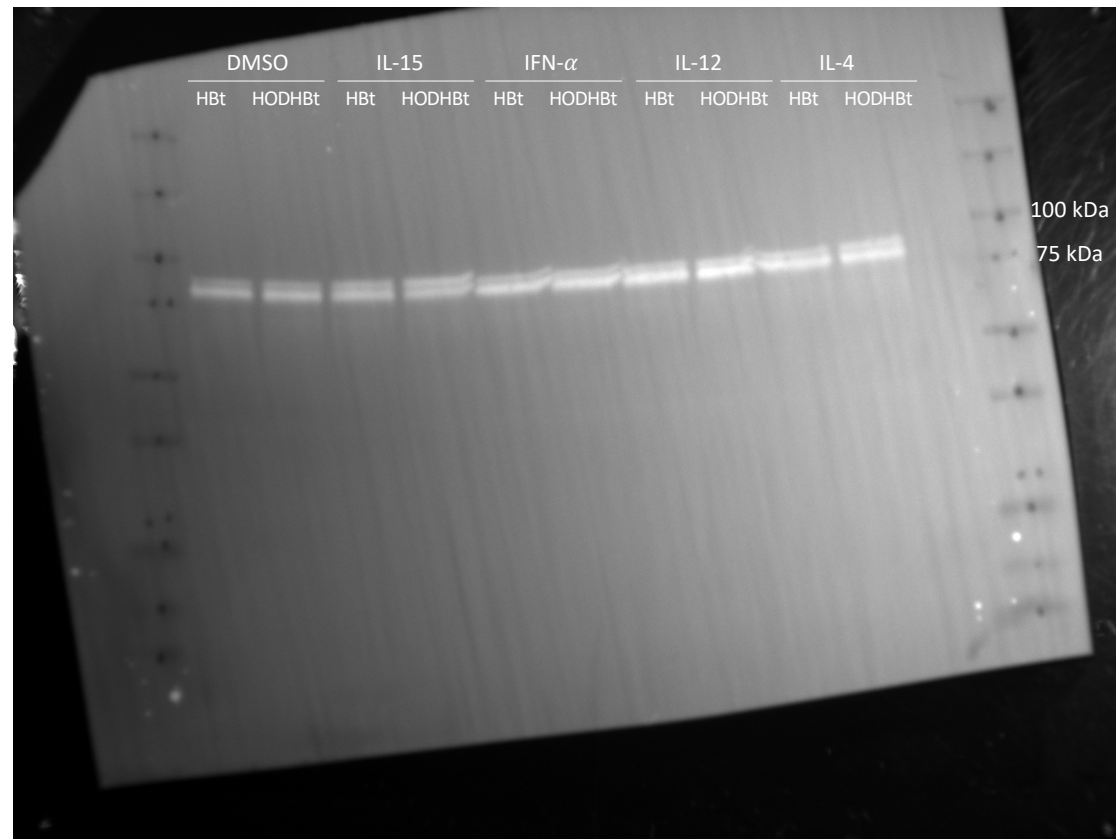

Full unedited blot for Figure 3A  
STAT5 actin

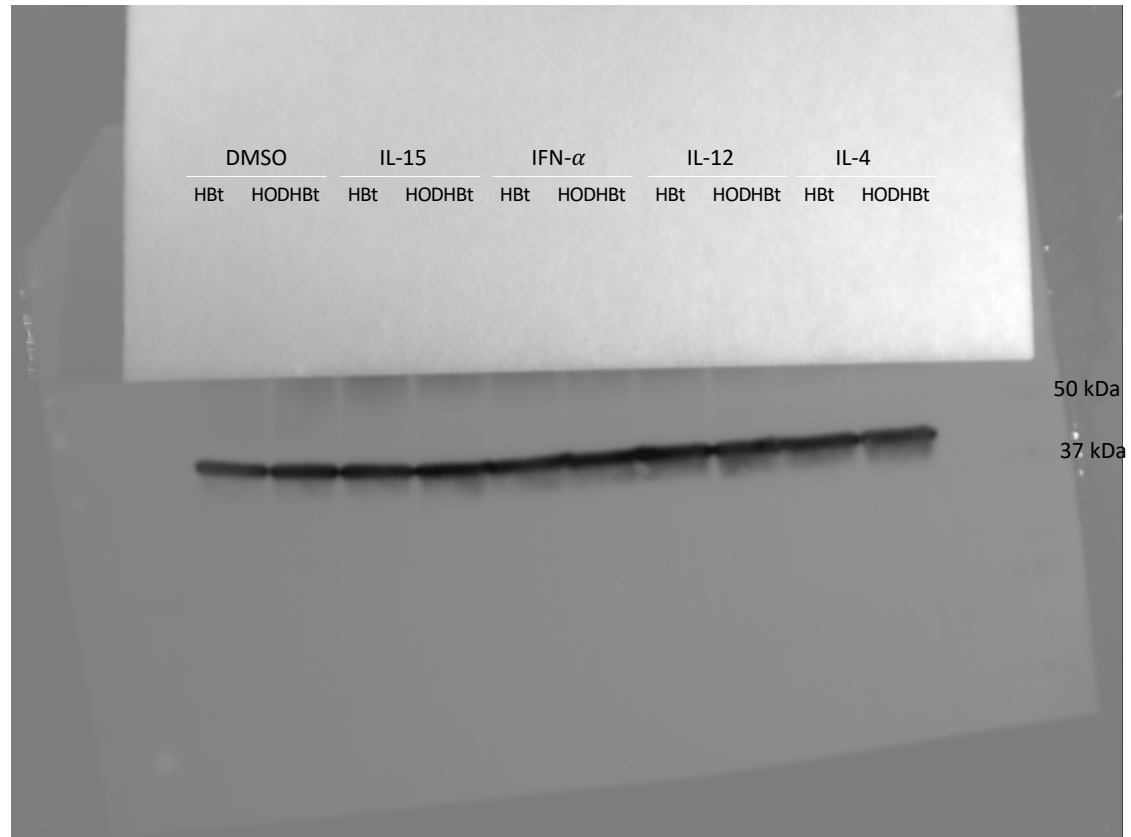



Full unedited blot for Figure 3B  
pSTAT2 actin

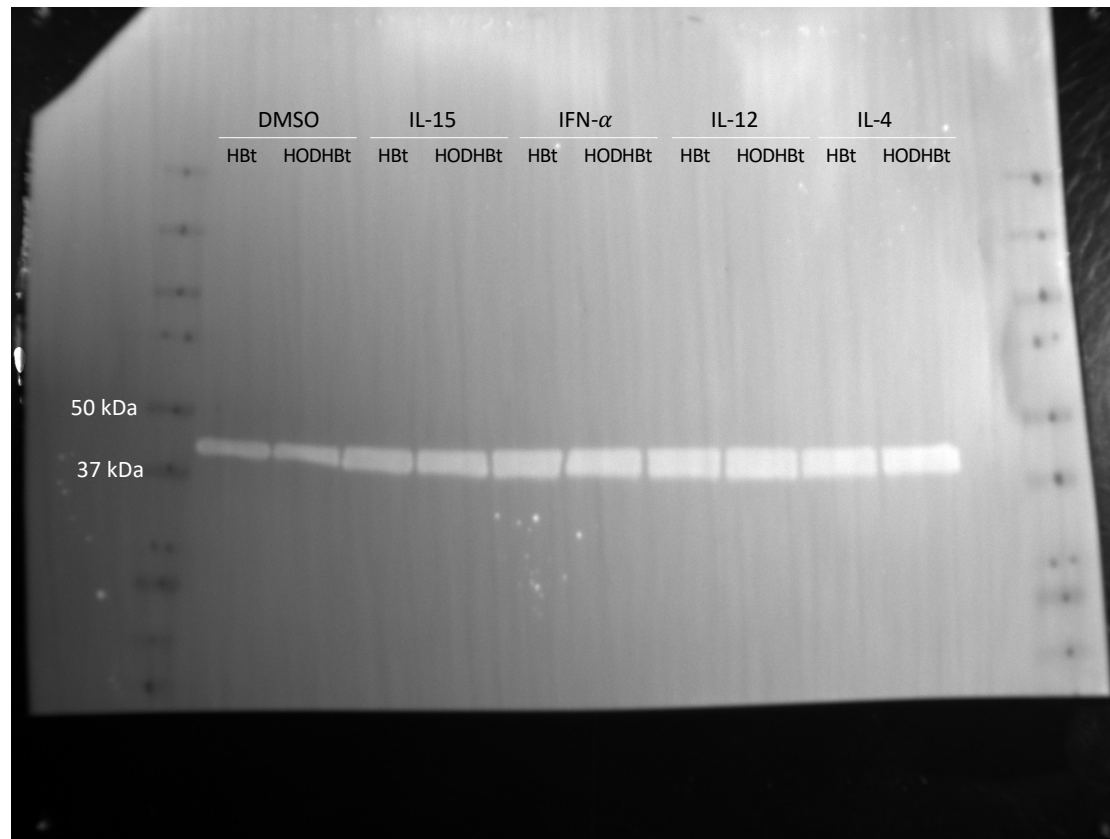





Full unedited blot for Figure 3B  
STAT2 actin

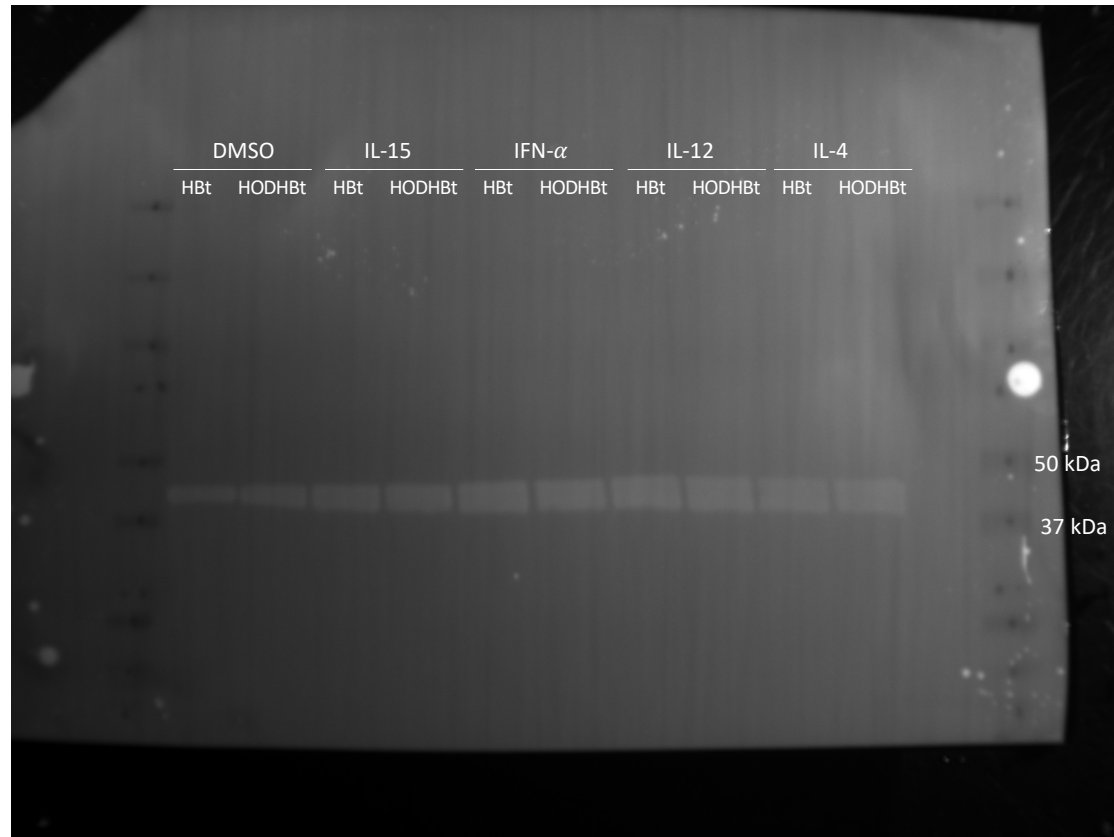



Full unedited blot for Figure 3B  
pSTAT4 actin

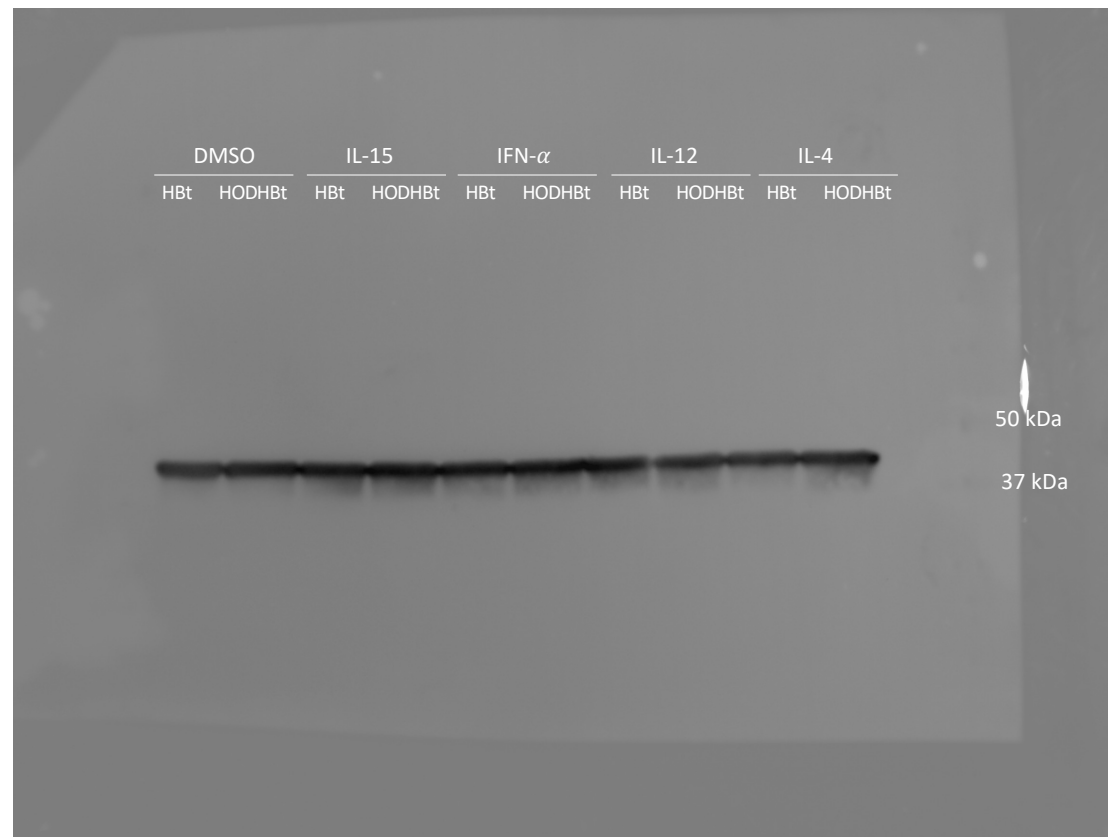

Full unedited blot for Figure 3B  
STAT4

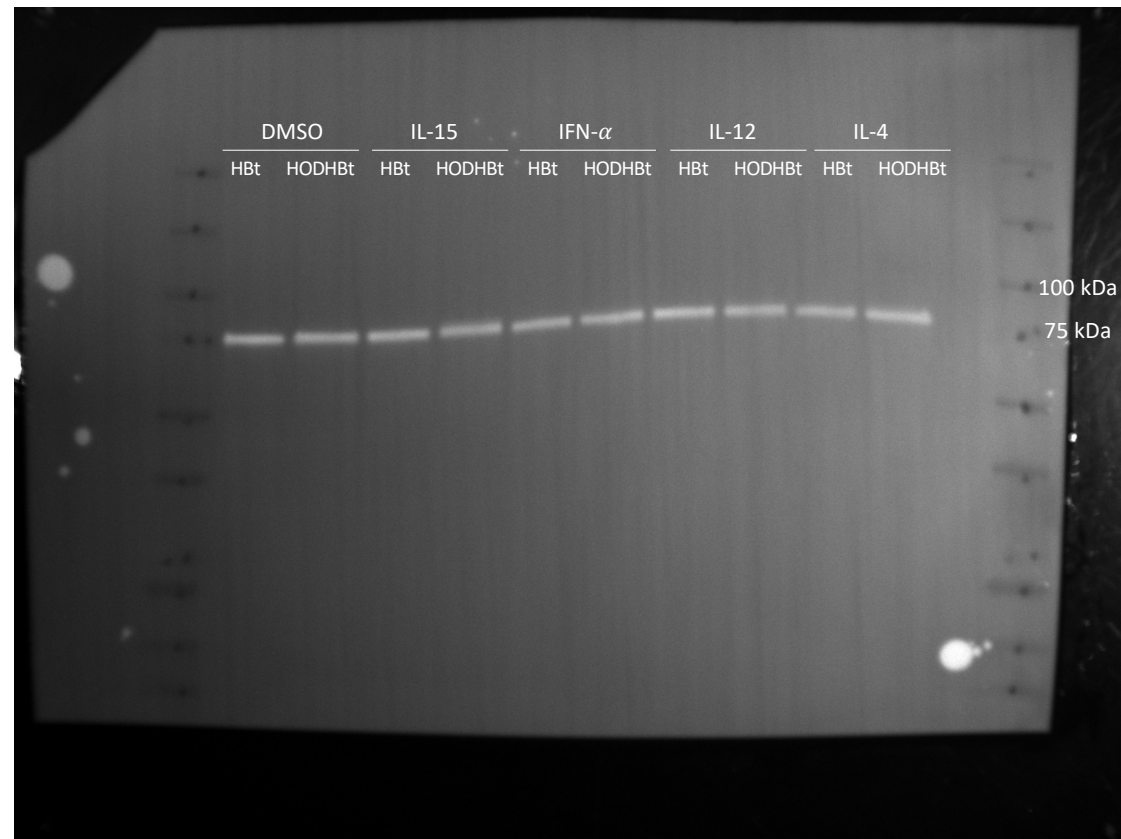

Full unedited blot for Figure 3B  
STAT4 actin

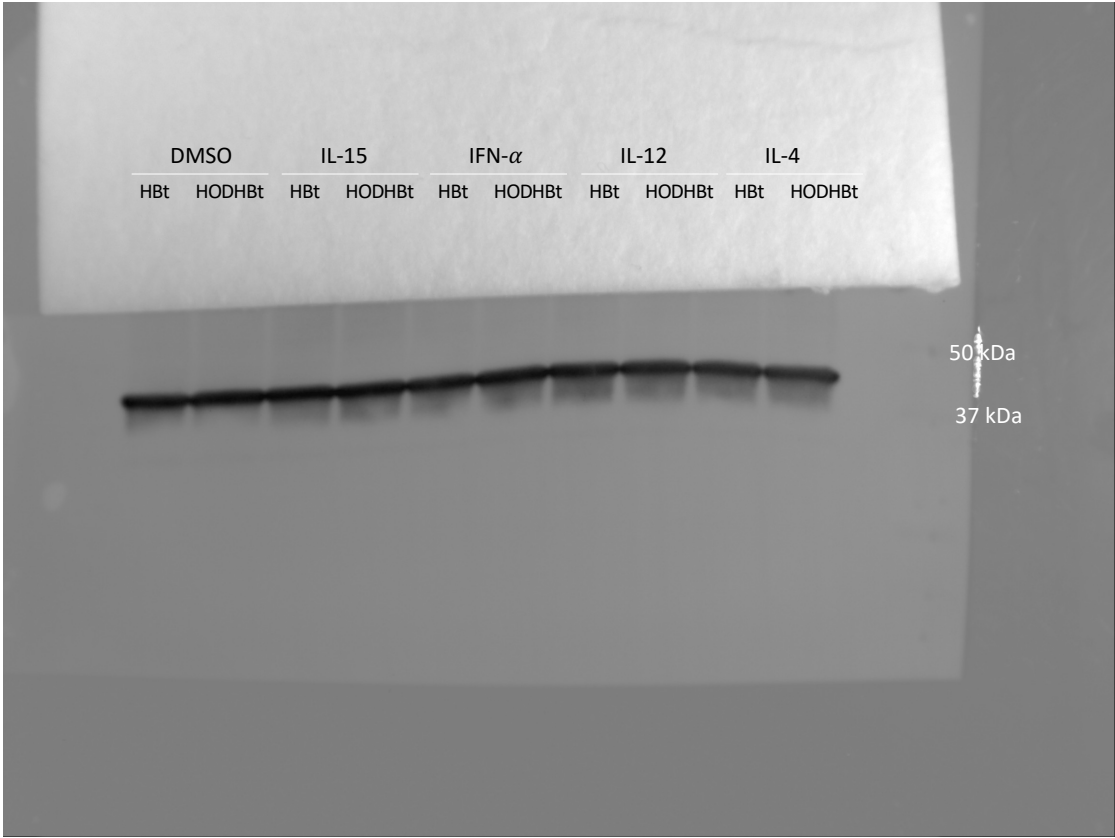



Full unedited blot for Figure 3B  
pSTAT6 actin

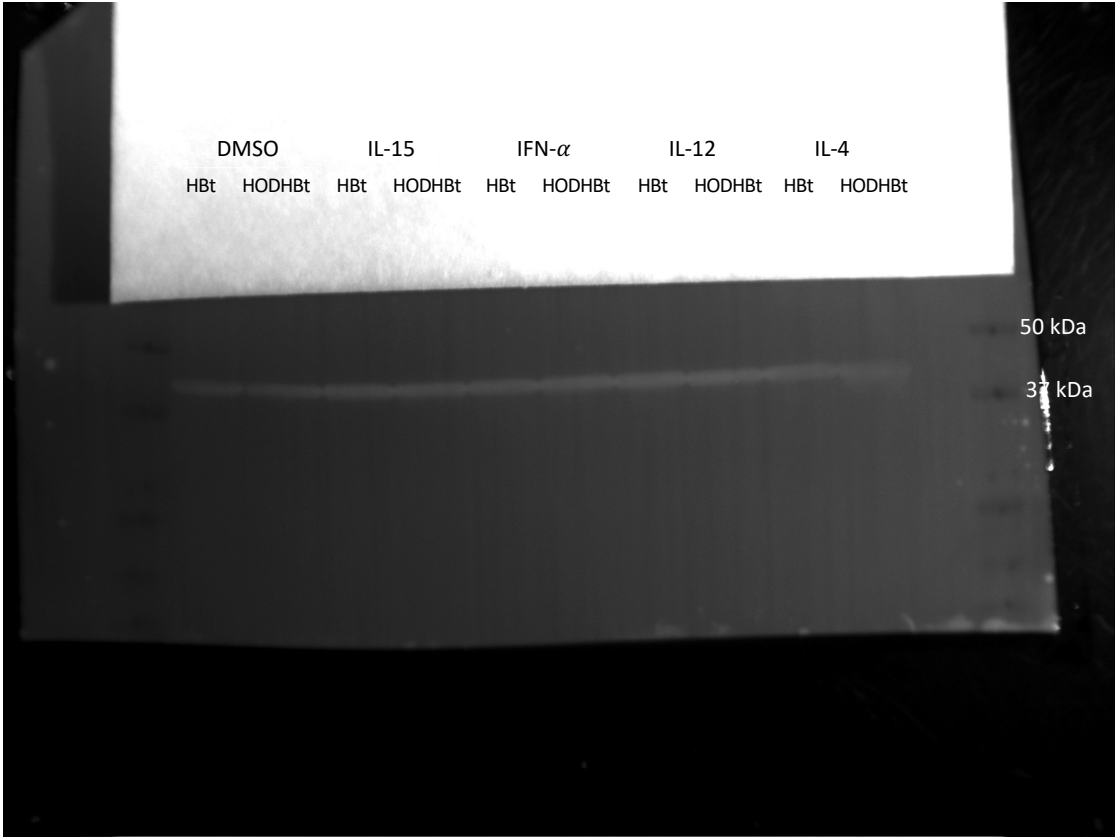





Full unedited blot for Figure 3B  
STAT6 actin

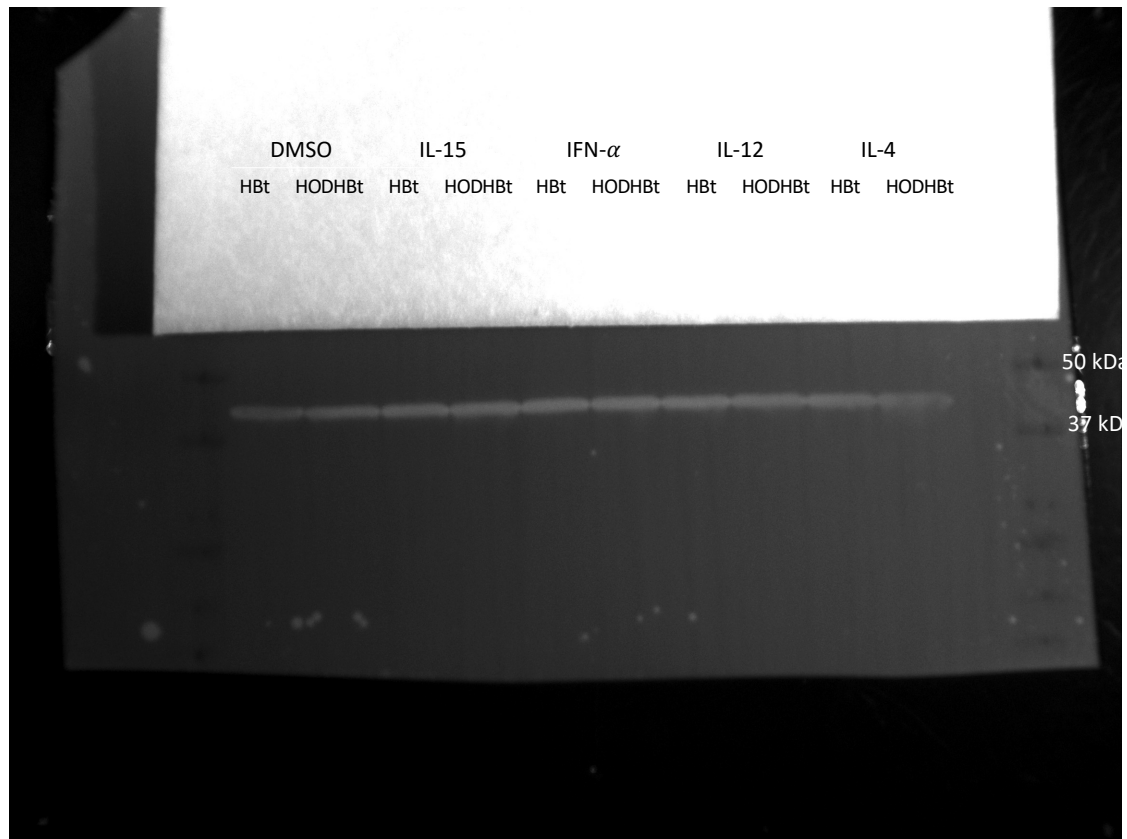

Full unedited blot for Figure 3D  
pSTAT2

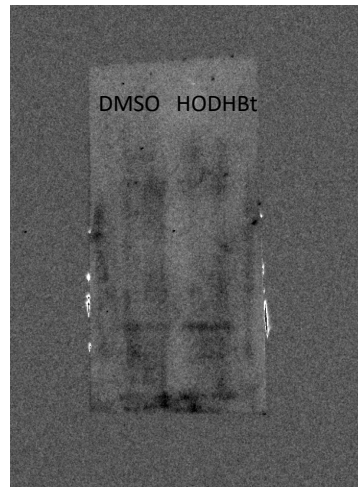

Full unedited blot for Figure 3D  
V5-tag

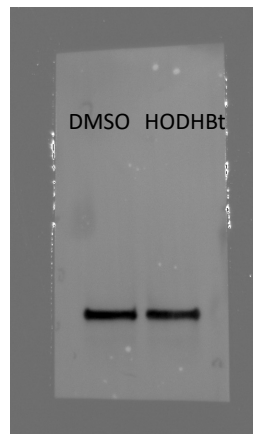

Full unedited blot for Figure 5C

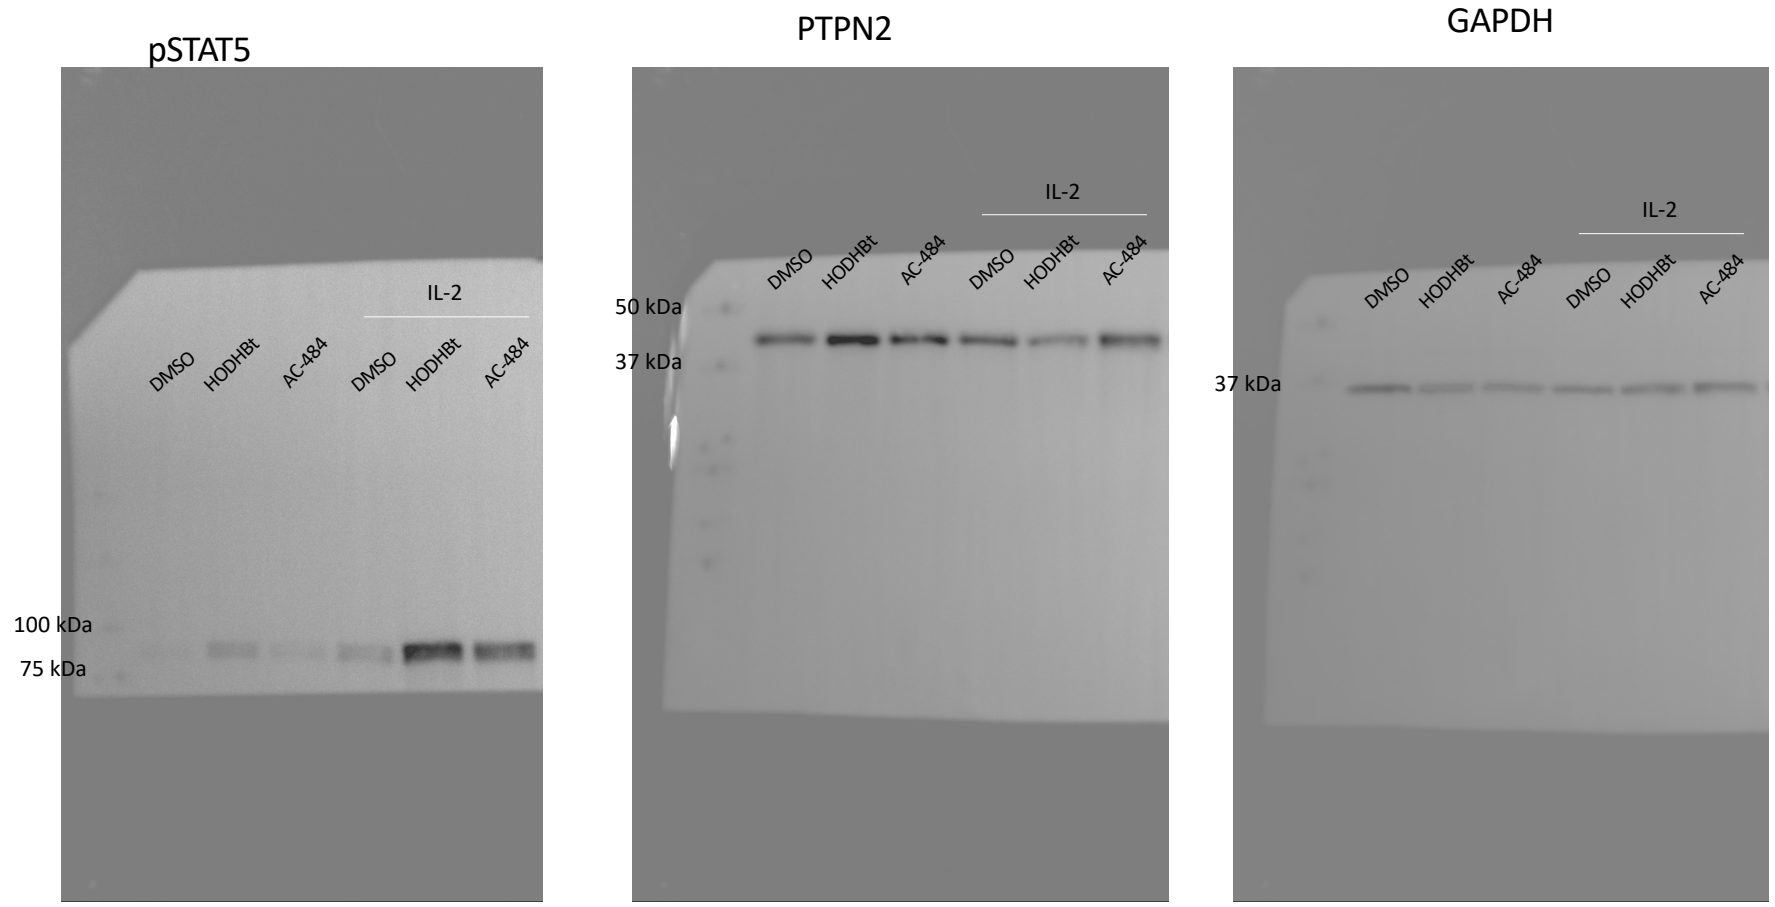

Full unedited blot for Figure 5C

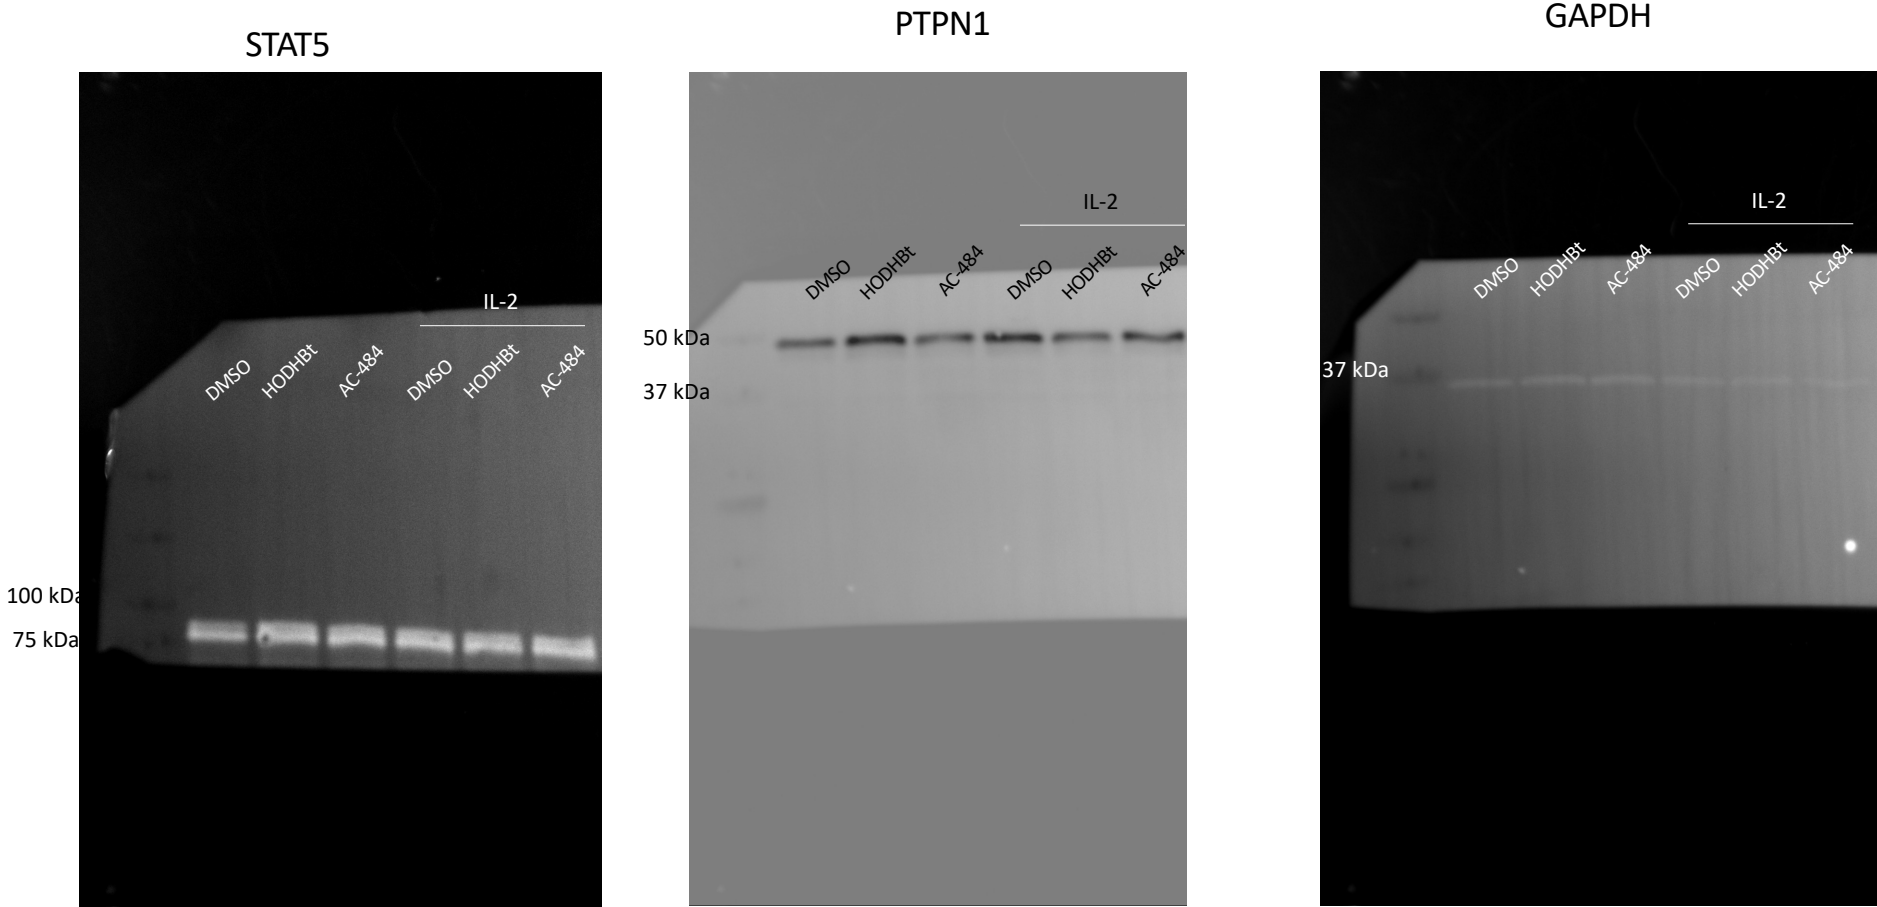

Full unedited blot for Figure 5D

pSTAT5

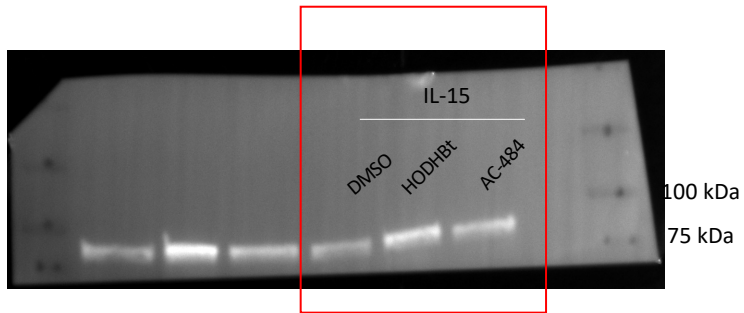

PTPN2

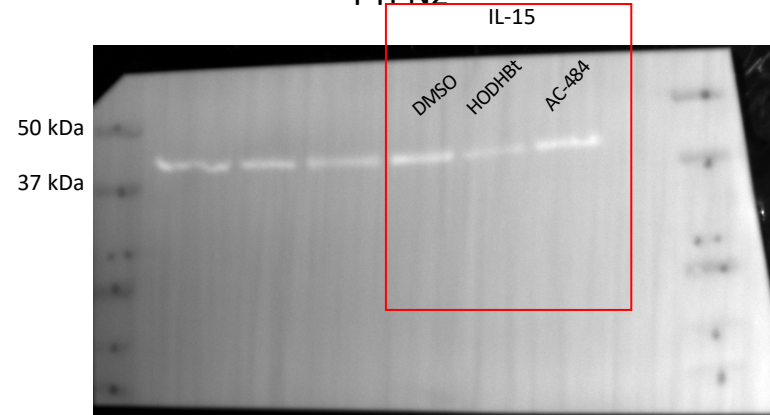

GAPDH

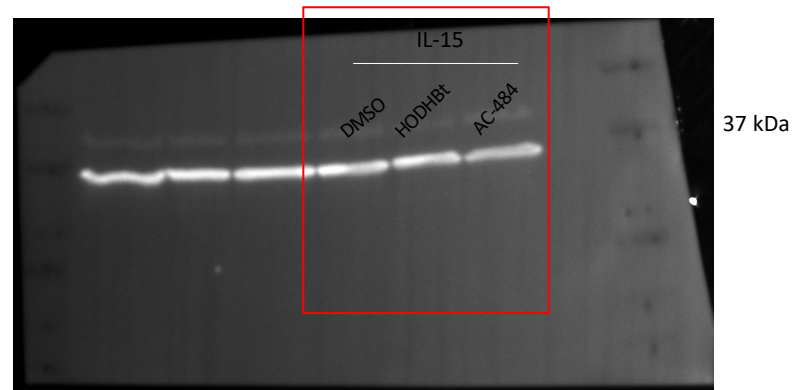

Full unedited blot for Figure 5D

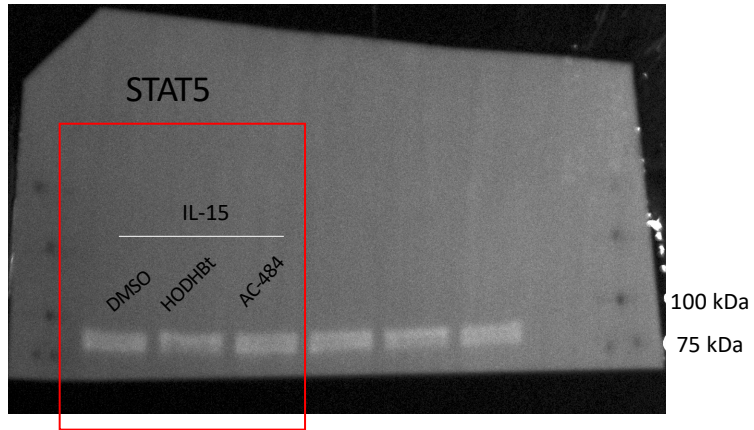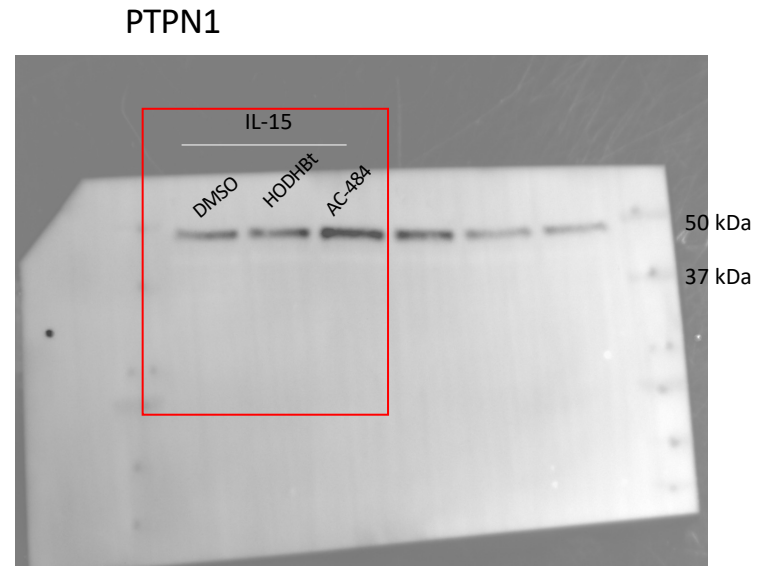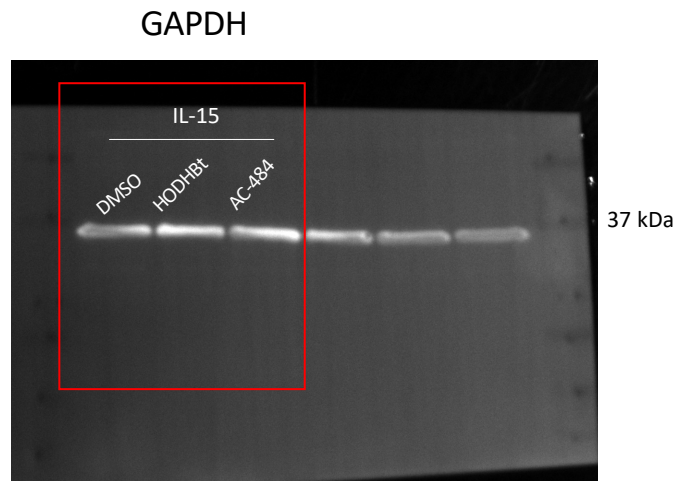



Full unedited blot for Supplemental Figure 2  
RPL7A

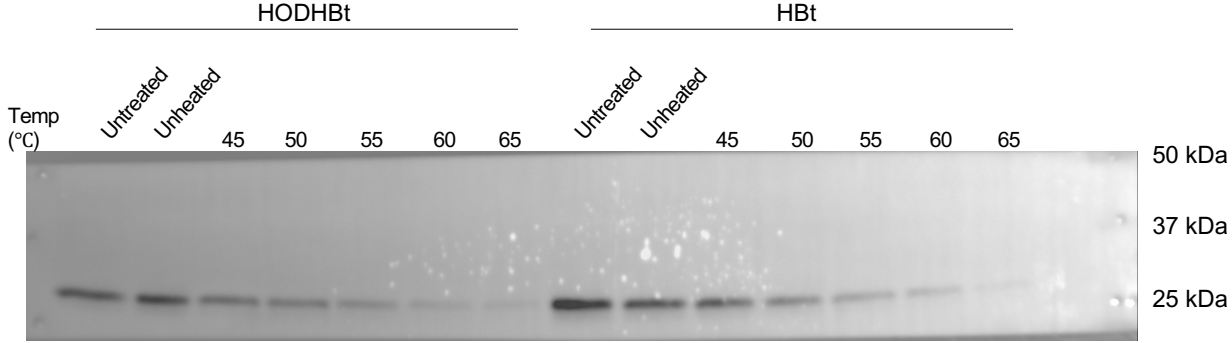



Full unedited blot for Supplemental Figure 2  
actin

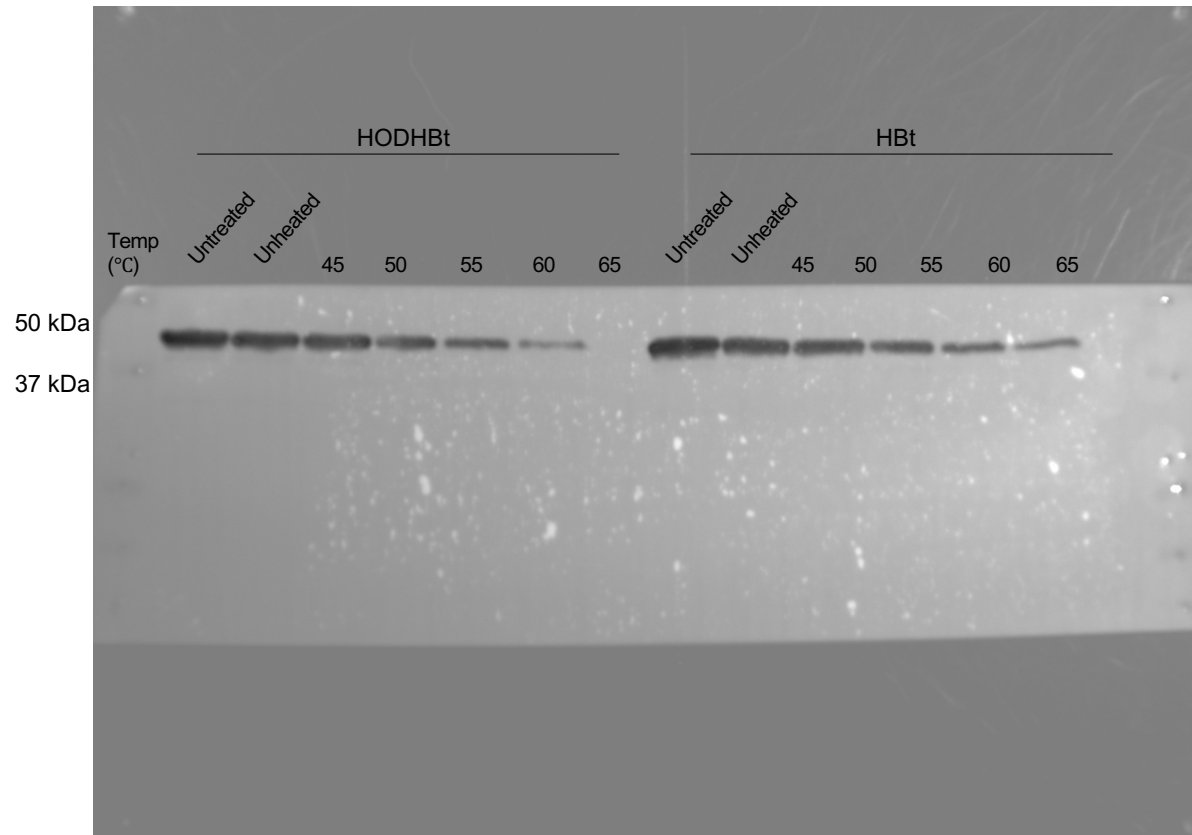





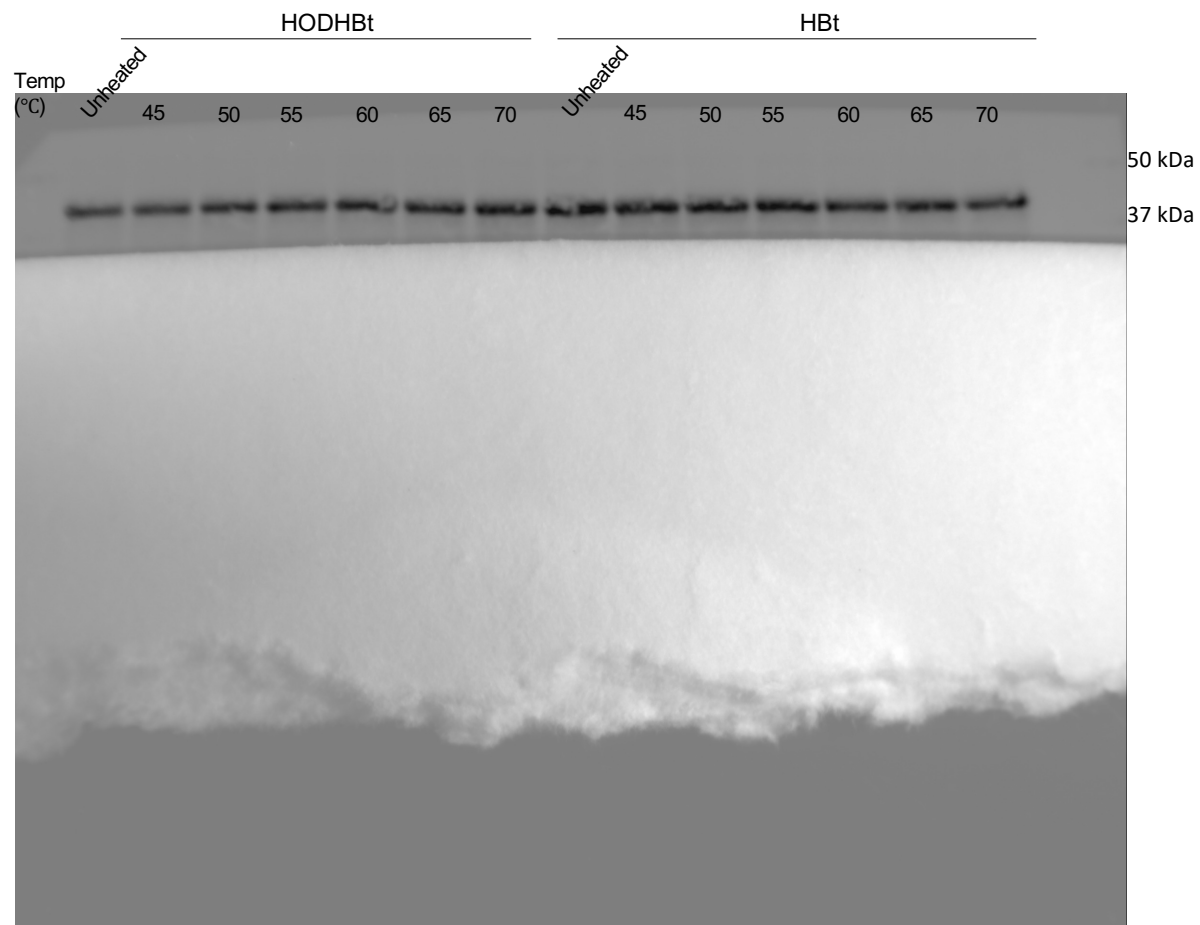

Full unedited blot for Supplemental Figure 2  
PTPN2

Full unedited blot for Supplemental Figure 3D

pSTAT5

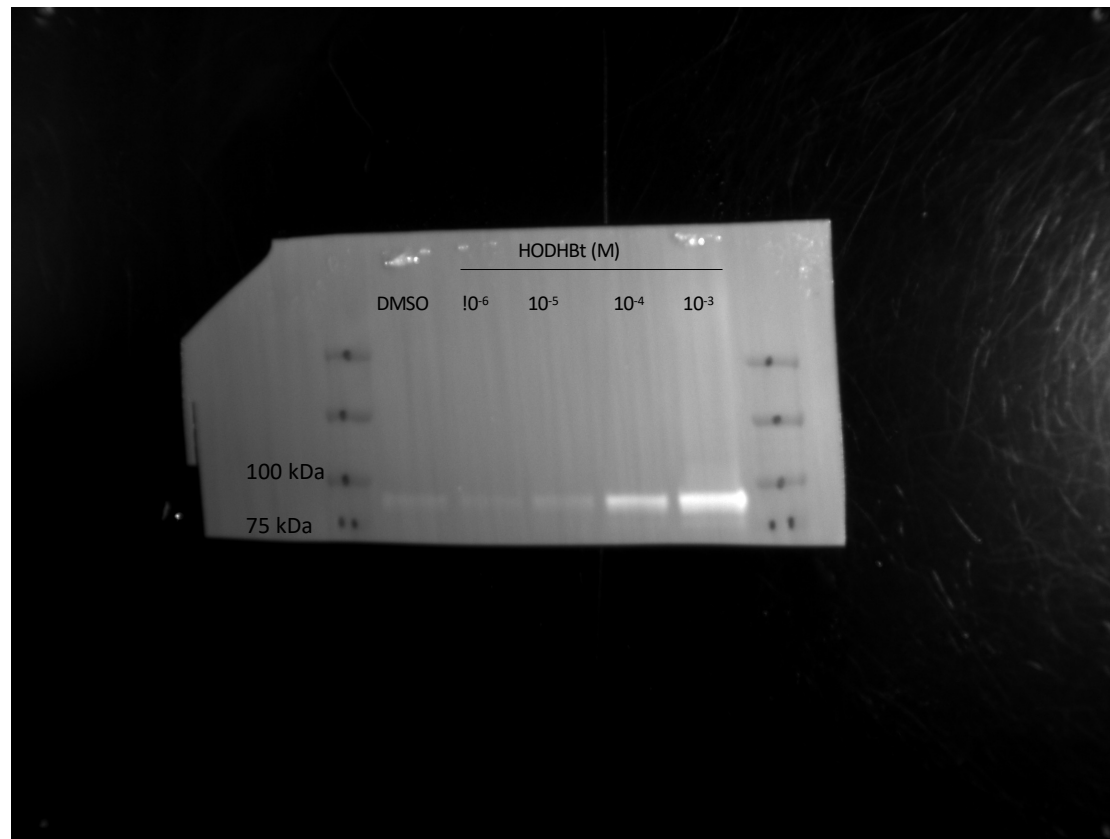

Full unedited blot for Supplemental Figure 3D  
STAT5

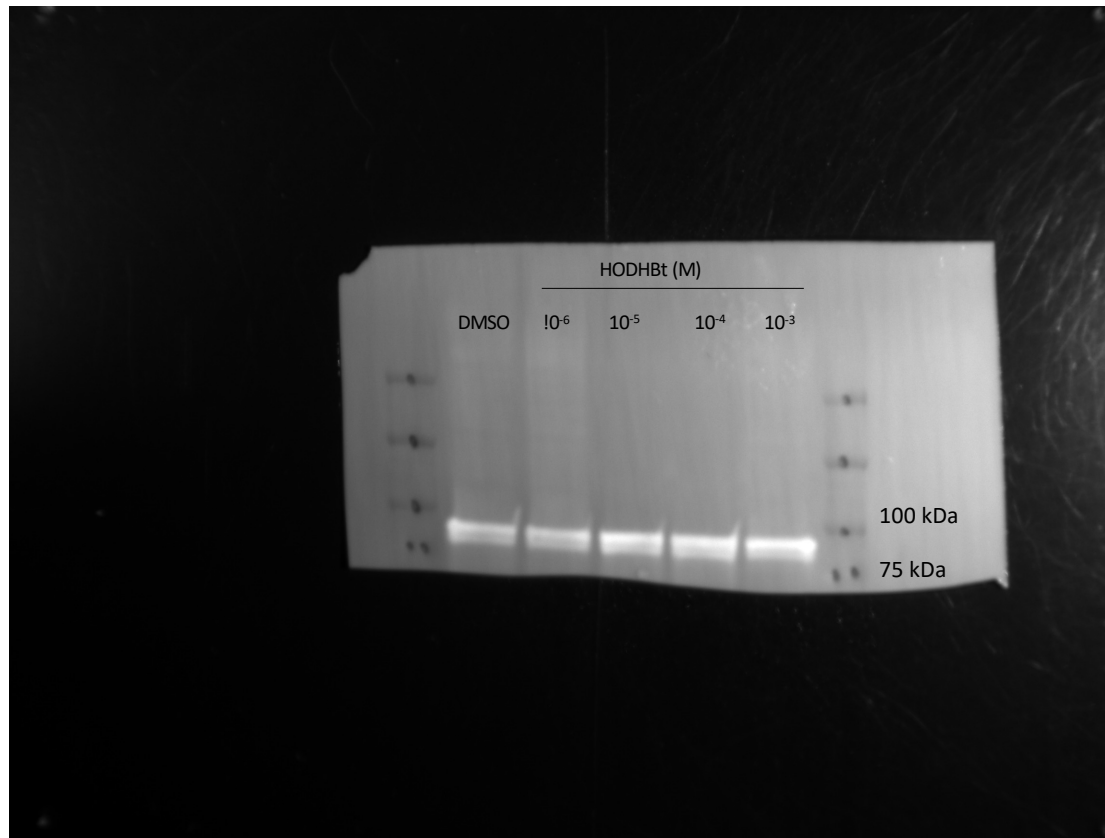



Full unedited blot for Supplemental Figure 3D  
PTPN1

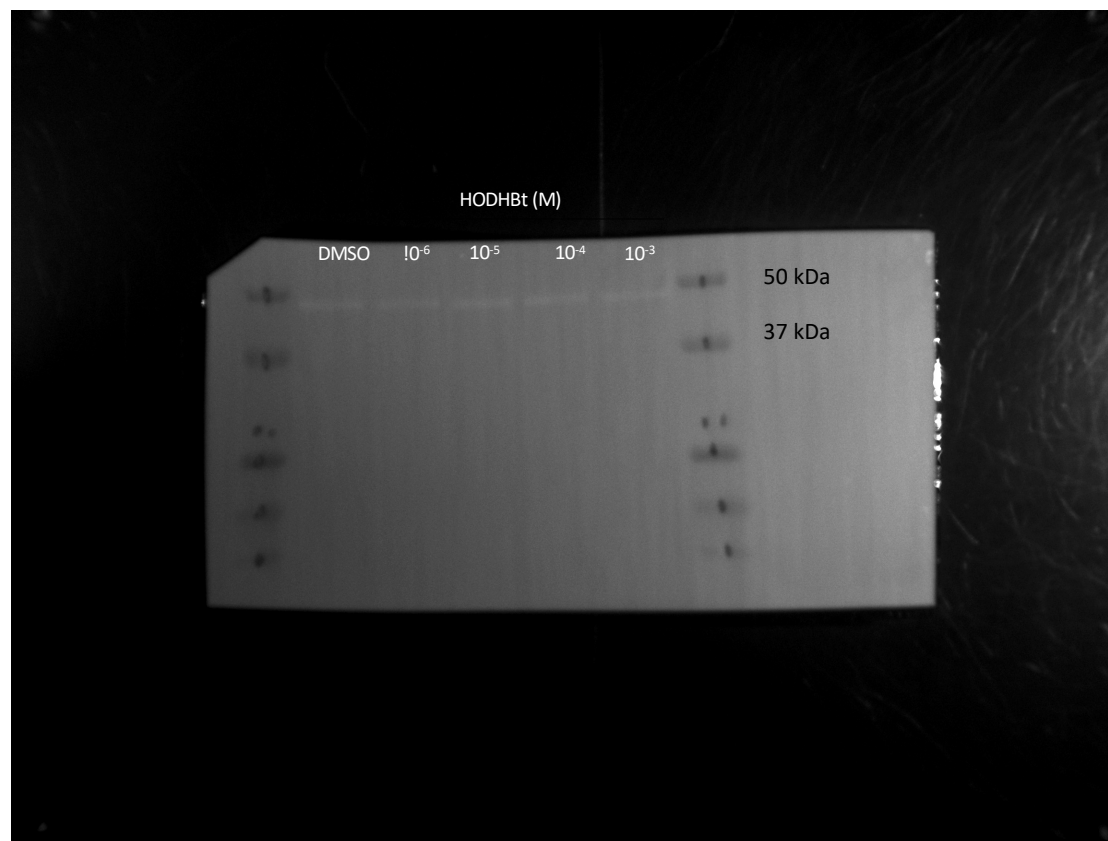

Full unedited blot for Supplemental Figure 3D  
PTPN2

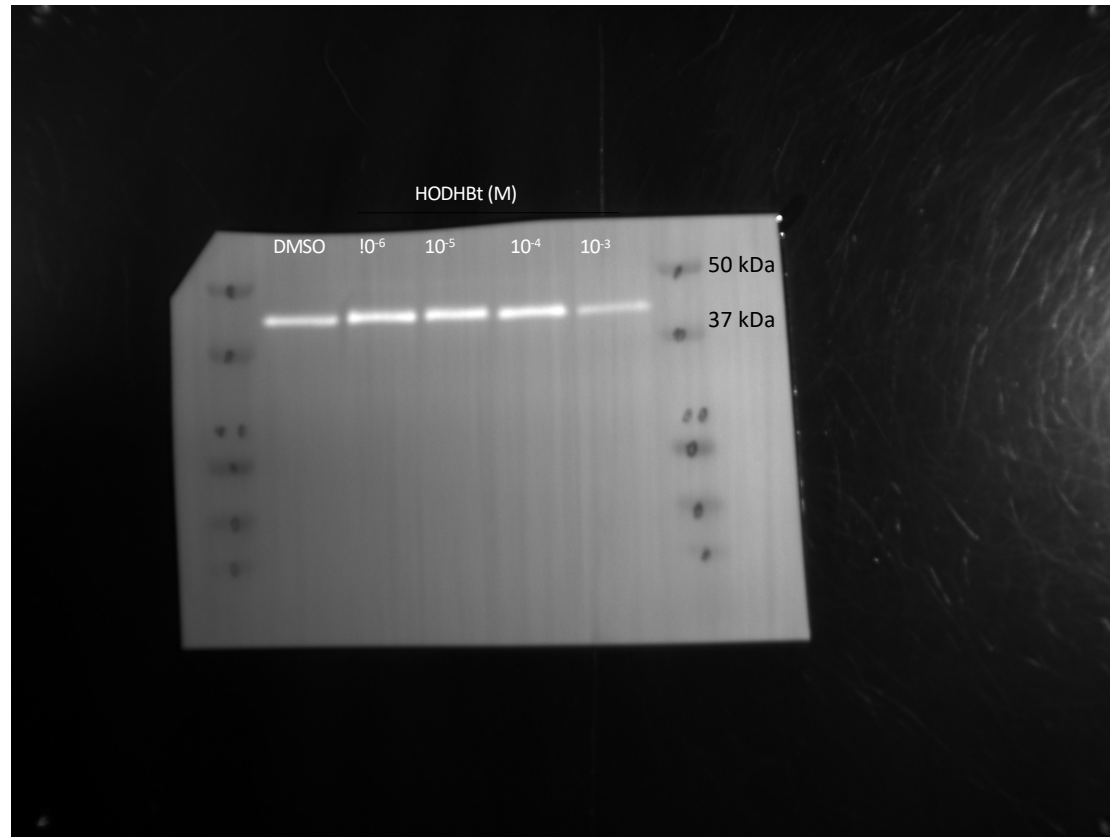

Full unedited blot for Supplemental Figure 3D  
Actin

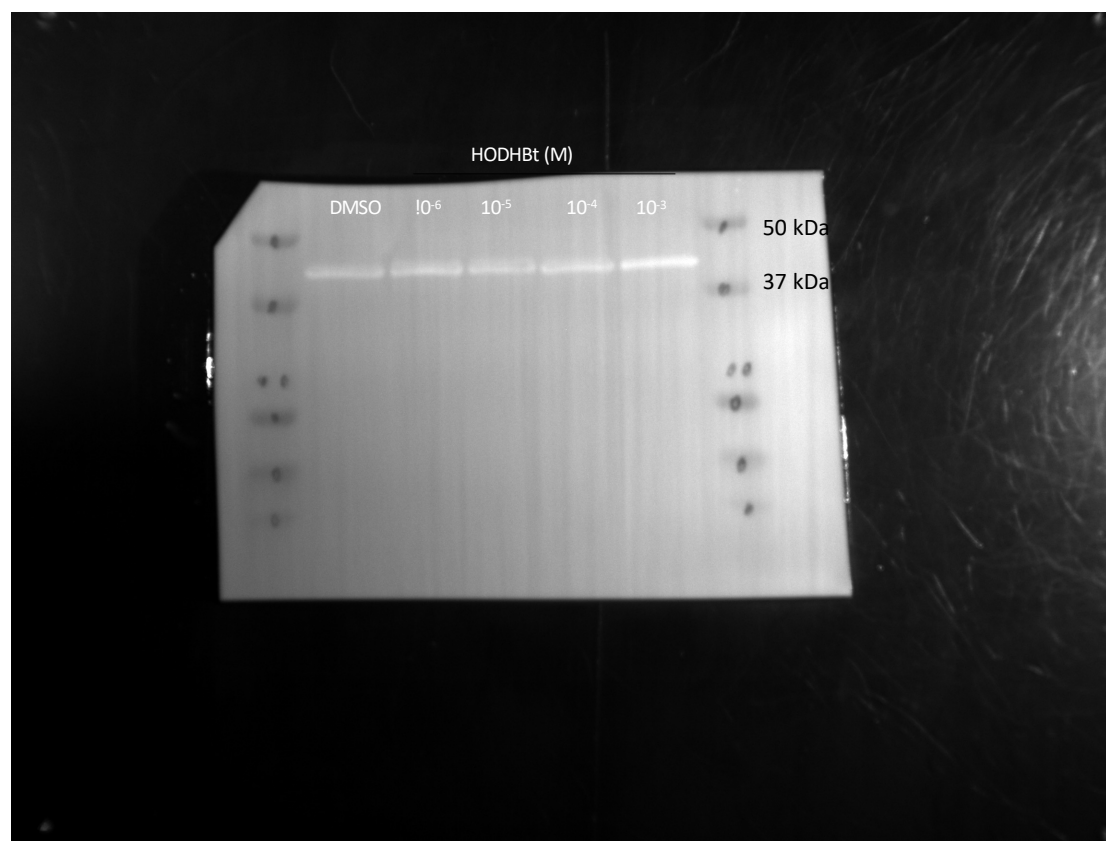

Supplement: jciinsight-9-179680-s107.pdf [file jciinsight-9-179680-s107.pdf]
