# Supplementary material for: The HIV latency reversing agent HODHBt inhibits the phosphatases PTPN1 and PTPN2
Source: JCI journal article supplement (doi:10.1172/jci.insight.179680), 2024-08-08
Supplement: sd1 [file 1]

You are being redirected.
