# Supplementary material for: The HIV latency reversing agent HODHBt inhibits the phosphatases PTPN1 and PTPN2
Source: JCI Insight. 2024 Aug 8;9(18):e179680. doi: 10.1172/jci.insight.179680 (PMC11457865; doi:10.1172/jci.insight.179680)
Supplement: Supplemental data set 1 [file jciinsight-9-179680-s104.xlsx]

## Sheet: PBMC Intact
Protein	Gene	Description	CETSA_0_2	CETSA_0_1	CETSA_1_2	CETSA_1_1	CETSA_3_2	CETSA_3_1	CETSA_10_2	CETSA_10_1	CETSA_30_2	CETSA_30_1	CETSA_100_2	CETSA_100_1	CETSA_300_2	CETSA_300_1	CETSA_1000_1	CETSA_1000_2	RT_0_1	RT_1_1	RT_3_1	RT_10_1	RT_30_1	RT_100_1	RT_300_1	RT_1000_1	r2	pEC50	p.value_CETSA	p_adj_CETSA	effect_CETSA	-Log10 p_adj
Q96GK7	FAHD2A	Fumarylacetoacetate hydrolase domain-containing protein 2A OS=Homo sapiens OX=9606 GN=FAHD2A PE=1 SV=1	0.0111216	-0.0111216	0.00293343	-0.0521282	-0.0390813	0.00677714	-0.00504091	0.0297648	0.0716585	0.0895224	0.188021	0.154751	0.234691	0.259066	0.354342	0.388446	0	-0.179992	-0.184785	-0.319108	-0.121332	-0.130983	-0.150216	-0.22787	0.972829	3.68489	3.3944e-11	1.48e-07	0.380309	6.82974
A0A1B0GTG2	ALDH7A1	Isoform of P49419, Alpha-aminoadipic semialdehyde dehydrogenase OS=Homo sapiens OX=9606 GN=ALDH7A1 PE=1 SV=1	-0.0175464	0.0175464	0.0111752	0.0218069	0.0377981	0.00959898	0.00347592	-0.0351815	0.0254261	0.0117434	0.0891648	0.0987103	0.173492	0.153439	0.393352	0.412383	0	0.0816665	0.042359	0.13622	0.0726901	0.0575918	0.138624	0.0403573	0.970439	3.31311	6.11741e-11	1.48e-07	0.383235	6.82974
P07996	THBS1	Thrombospondin-1 OS=Homo sapiens OX=9606 GN=THBS1 PE=1 SV=2	-0.00478721	0.00478721	-0.00311576	-0.00236082	0.035143	0.028716	0.0449911	0.024874	0.154516	0.159959	0.340453	0.271809	0.472953	0.490574	0.504	0.380419	0	0.110619	0.0935731	0.135822	0.183358	0.342475	0.418622	0.421335	0.970359	4.25272	6.2342e-11	1.48e-07	0.465291	6.82974
P49746	THBS3	Thrombospondin-3 OS=Homo sapiens OX=9606 GN=THBS3 PE=1 SV=1	-0.0142618	0.0142618	0.0384576	0.0791232	0.155711	0.0985062	0.191497	0.190142	0.305104	0.26871	0.648012	0.596106	0.92792	0.93954	1.10248	0.787973	0	0.0605853	0.074572	0.0956498	0.229533	0.526649	0.795505	0.886766	0.9642	4.16809	2.33076e-10	4.14993e-07	0.948095	6.38196
Q6IQ26	DENND5A	DENN domain-containing protein 5A OS=Homo sapiens OX=9606 GN=DENND5A PE=1 SV=2	-0.121804	0.121804	0.084183	0.0643898	0.0606803	0.0386439	0.177633	-0.0444129	0.144636	0.142811	0.575881	1.30295	1.34303	1.41536	2.3419	2.45968	0	0.0340346	-0.0218056	0.0772843	0.0453441	-0.020502	0.00267376	-0.047454	0.956949	3.45398	8.44859e-10	1.20342e-06	2.36225	5.91958
P11177	PDHB	Pyruvate dehydrogenase E1 component subunit beta, mitochondrial OS=Homo sapiens OX=9606 GN=PDHB PE=1 SV=3	-0.014134	0.014134	-0.019002	-0.0126101	-0.0154438	-0.0813383	-0.0318396	-0.0281582	-0.015242	-0.0468408	0.0217605	0.0342529	0.11316	0.15273	0.263663	0.297279	0	-0.0509241	-0.0904178	-0.0792369	-0.103382	-0.0907122	-0.14802	-0.149324	0.950842	3.4588	2.13214e-09	2.53084e-06	0.301145	5.59673
Q12841	FSTL1	Follistatin-related protein 1 OS=Homo sapiens OX=9606 GN=FSTL1 PE=1 SV=1	0.275871	-0.275871	-0.218564	-0.304464	-1.33388	-1.77713	-1.68669	-1.50963	-1.71486	-1.69723	-1.73706	-1.72531	-1.58773	-1.82672	-1.87401	-1.99335	0	-0.228046	-0.0994458	-0.347442	-0.121443	-0.170955	-0.197824	-0.17447	0.948559	5.78627	2.92689e-09	2.9779e-06	-1.73757	5.52609
P17706	PTPN2	Tyrosine-protein phosphatase non-receptor type 2 OS=Homo sapiens OX=9606 GN=PTPN2 PE=1 SV=2	0.0565934	-0.0565934	-0.0542586	-0.0204614	-0.192078	-0.126204	-0.210895	-0.256173	-0.381676	-0.339683	-0.371162	-0.404815	-0.346128	-0.406912	-0.338169	-0.356005	0	0.0338482	-0.00823916	0.0482484	0.0203577	-0.0205867	0.054042	0.0215671	0.941868	5.32205	6.8676e-09	6.11388e-06	-0.378343	5.21368
P08559	PDHA1	Pyruvate dehydrogenase E1 component subunit alpha, somatic form, mitochondrial OS=Homo sapiens OX=9606 GN=PDHA1 PE=1 SV=3	-0.0104451	0.0104451	-0.0569416	-0.0563308	-0.026001	-0.0823975	0.0290223	0.0234877	-0.0593349	-0.0410404	0.0379531	0.0297918	0.144363	0.153405	0.303086	0.333174	0	-0.0474007	-0.0248052	0.0334679	-0.0580332	-0.0351459	-0.0313763	-0.0633427	0.932204	3.44231	2.0062e-08	1.58757e-05	0.340342	4.79927
P18440	NAT1	Arylamine N-acetyltransferase 1 OS=Homo sapiens OX=9606 GN=NAT1 PE=1 SV=2	-0.00887667	0.00887667	-0.0169498	0.0262617	0.120149	0.0236799	0.0108269	0.0314633	0.0894787	0.0998323	0.134563	0.102274	0.227522	0.199316	0.376	0.341541	0	0.0555804	0.0318501	0.00868447	-0.0293513	0.00549434	0.0402549	0.0345168	0.927404	3.44497	3.23118e-08	2.30063e-05	0.325744	4.63815
O00429-2	DNM1L	Isoform of O00429, Isoform 4 of Dynamin-1-like protein OS=Homo sapiens OX=9606 GN=DNM1L PE=1 SV=2	-0.0339458	0.0339458	0.0922168	-0.0126808	0.0582619	-0.0614581	-0.0308609	0.104381	0.0452701	0.120748	0.106212	0.113459	0.341918	0.372117	0.49852	0.47711	0	-0.0598158	-0.0817877	-0.0964921	0.0111152	-0.110072	-0.0470766	0.108665	0.926406	3.67925	3.55335e-08	2.30063e-05	0.470816	4.63815
Q96ED9	HOOK2	Protein Hook homolog 2 OS=Homo sapiens OX=9606 GN=HOOK2 PE=1 SV=3	0.00668721	-0.00668721	0.133704	0.129894	0.100871	0.0520642	0.214685	0.0952486	0.205462	0.25724	0.183716	0.253908	0.37292	0.289113	0.444295	0.4876	0	0.0284323	-0.0764645	0.0108909	0.0529502	0.00700106	0.0268072	0.00316398	0.894571	3.80917	4.16781e-08	2.4736e-05	0.423691	4.60667
Q96G46	DUS3L	tRNA-dihydrouridine(47) synthase [NAD(P)(+)]-like OS=Homo sapiens OX=9606 GN=DUS3L PE=1 SV=2	-0.00806154	0.00806154	0.0530197	0.0257714	0.0680468	0.0790433	0.141463	0.0510007	0.0587301	0.0547081	0.137136	0.152979	0.22817	0.240057	0.307129	0.324546	0	0.0380906	0.0156029	0.111427	0.0654986	0.0152329	0.0200325	0.0796936	0.917043	3.57118	8.1816e-08	4.48226e-05	0.285138	4.3485
Q14BN4	SLMAP	Sarcolemmal membrane-associated protein OS=Homo sapiens OX=9606 GN=SLMAP PE=1 SV=1	-0.0632158	0.0632158	-0.0394504	-0.0916824	-0.0162708	-0.048562	0.000760245	0.0108163	-0.0831944	-0.0708473	0.13856	0.236307	0.229939	0.22537	0.608153	0.588623	0	-0.049576	7.95153e-05	0.0839723	0.000694691	-0.0144179	-0.0113598	0.0239592	0.908906	3.33506	1.56895e-07	7.98146e-05	0.598472	4.09792
P10909-4	CLU	Isoform of P10909, Isoform 4 of Clusterin OS=Homo sapiens OX=9606 GN=CLU PE=1 SV=1	0.0109933	-0.0109933	0.0544282	0.0558925	0.0546628	0.019772	0.10602	0.0763308	0.0650091	0.106073	0.0674168	0.0761455	0.146614	0.105201	0.139558	0.1238	0	0.0553333	0.0893739	0.113196	0.0213391	0.0557982	0.0935807	0.0471216	0.816943	5.14274	2.09192e-07	9.93245e-05	0.17615	4.00294
Q6XYD6	BRD3OS	Isoform of A0A1B0GUI7, LP2477 OS=Homo sapiens OX=9606 GN=BRD3OS PE=2 SV=1	-0.0727725	0.0727725	-0.0780035	-0.172821	-0.0142084	-0.0413197	-0.0105287	-0.105297	-0.0327292	0.0138699	0.0436558	0.259495	0.318182	0.331264	0.554411	0.5388	NA	NA	NA	NA	NA	NA	NA	NA	0.900325	3.59057	2.93428e-07	0.000128637	0.588479	3.89063
B4DR61	SEC61A1	Isoform of P61619, Protein transport protein Sec61 subunit alpha isoform 1 OS=Homo sapiens OX=9606 GN=SEC61A1 PE=1 SV=1	-0.0279032	0.0279032	0.047761	0.216661	0.0599141	0.224259	0.55283	0.502301	0.289962	0.461526	0.521589	0.81671	0.601669	0.459659	0.715356	0.805433	NA	NA	NA	NA	NA	NA	NA	NA	0.828177	5.08486	3.07053e-07	0.000128637	0.730328	3.89063
Q5VSY0	GKAP1	G kinase-anchoring protein 1 OS=Homo sapiens OX=9606 GN=GKAP1 PE=1 SV=2	-0.00435874	0.00435874	0.0198446	0.0338304	0.0730981	0.0152514	0.070666	0.0333858	-0.0293415	-0.00317981	0.000840348	-0.0223733	-0.223619	-0.19332	-0.179707	-0.143008	NA	NA	NA	NA	NA	NA	NA	NA	0.898658	3.90979	3.29287e-07	0.000130288	-0.202753	3.8851
Q8TDB6	DTX3L	E3 ubiquitin-protein ligase DTX3L OS=Homo sapiens OX=9606 GN=DTX3L PE=1 SV=1	-0.0186863	0.0186863	-0.0369735	-0.0189724	-0.0292978	-0.0224639	-0.0522358	-0.0559277	-0.0451149	-0.0482541	-0.0500155	-0.0705694	-0.0400053	-0.0762603	-0.0864341	-0.0922554	0	0.012946	0.00960075	0.0449351	0.0434887	0.0227463	-0.000487006	0.0224178	0.788693	4.86561	7.17357e-07	0.000268896	-0.110264	3.57042
Q8NF50	DOCK8	Dedicator of cytokinesis protein 8 OS=Homo sapiens OX=9606 GN=DOCK8 PE=1 SV=3	-0.00931597	0.00931597	-0.0283447	-0.0124579	-0.0145244	-0.0413053	-0.0546069	-0.0482058	-0.0472923	-0.0483892	-0.0418936	-0.0562369	-0.0464885	-0.0513888	-0.0534209	-0.0935351	0	0.00568419	-0.0206822	-0.0290782	-0.0130041	-0.0273064	-0.0323535	-0.0162637	0.786458	5.88334	1.00835e-06	0.000359072	-0.0903186	3.44482
A0A1P0AYU5	SFXN3	Isoform of Q9BWM7, Sidoreflexin OS=Homo sapiens OX=9606 GN=SFXN3 PE=1 SV=1	-0.00249071	0.00249071	0.0859952	0.0896276	0.028991	0.0957315	0.0686848	0.0730884	0.0677879	0.0812498	0.130405	0.13993	0.143391	0.167583	0.11014	0.125228	NA	NA	NA	NA	NA	NA	NA	NA	0.782249	5.98177	1.38882e-06	0.000471007	0.189997	3.32697
E9PKV2	MRPL17	Isoform of Q9NRX2, 39S ribosomal protein L17, mitochondrial (Fragment) OS=Homo sapiens OX=9606 GN=MRPL17 PE=1 SV=1	0.0548724	-0.0548724	-0.0476794	-0.0701638	-0.11379	-0.144231	-0.0896895	-0.0801757	-0.132441	-0.120141	-0.14127	-0.171059	-0.157657	-0.22376	-0.158064	-0.242658	0	-0.0814767	0.00329842	0.127116	-0.00211378	0.159319	0.0604142	0.172856	0.770426	5.30895	1.50397e-06	0.000486875	-0.279844	3.31258
Q9NX55	HYPK	Huntingtin-interacting protein K OS=Homo sapiens OX=9606 GN=HYPK PE=1 SV=2	-0.00340676	0.00340676	0.0662476	0.0276768	0.0442816	0.0651228	0.0580883	0.0629804	0.0274759	0.022123	0.0863107	0.121136	0.146702	0.0991416	0.131979	0.142986	0	0.0993368	0.0412227	0.116506	0.0680604	0.0883774	0.177431	0.165788	0.764028	4.05039	1.69003e-06	0.000523323	0.0990393	3.28123
O60447	EVI5	Ecotropic viral integration site 5 protein homolog OS=Homo sapiens OX=9606 GN=EVI5 PE=1 SV=3	0.0338007	-0.0338007	-0.0399007	0.0133084	-0.0956166	0.0722153	0.0708161	0.0363812	-0.0382349	0.154639	0.0310887	0.40473	0.358477	0.400595	0.608184	0.557969	0	-0.115357	-0.197612	-0.260421	-0.217585	-0.22627	-0.00265607	-0.0640052	0.861653	3.52112	2.85736e-06	0.000769597	0.588782	3.11374
Q12906-7	ILF3	Isoform of Q12906, Isoform 7 of Interleukin enhancer-binding factor 3 OS=Homo sapiens OX=9606 GN=ILF3 PE=1 SV=3	0.000664417	-0.000664417	0.0235017	0.0105021	0.017357	0.0225065	0.00760868	0.018772	0.0265997	0.016349	0.0264952	0.0373946	0.045943	0.0321074	0.0579101	0.027421	0	0.0157482	-0.01665	-0.00558897	0.00844606	-0.00326168	-0.0112596	0.0128197	0.752384	4.54635	2.86752e-06	0.000769597	0.0491757	3.11374
Q9UBC2-2	EPS15L1	Isoform of Q9UBC2, Isoform 2 of Epidermal growth factor receptor substrate 15-like 1 OS=Homo sapiens OX=9606 GN=EPS15L1 PE=1 SV=1	0.00448	-0.00448	0.0087719	-0.00280581	-0.00225292	0.0112322	-0.00346499	-0.0125025	0.00780483	0.020278	0.0455729	0.040574	0.0569978	0.0255611	0.0414332	0.0543986	0	-0.0162248	-0.0139718	-0.0172912	-0.0101966	-0.0272465	-0.0138166	0.0493265	0.861382	4.48519	2.89635e-06	0.000769597	0.0441929	3.11374
H0YFD6	HADHA	Isoform of P40939, Enoyl-CoA hydratase OS=Homo sapiens OX=9606 GN=HADHA PE=1 SV=2	-0.0078997	0.0078997	-0.0942033	-0.0795212	-0.0401716	-0.113701	-0.0782824	-0.118726	-0.113853	-0.0828869	-0.0900473	-0.115218	-0.123445	-0.148229	-0.104333	-0.136164	0	-0.0510728	0.00308125	0.013657	-0.0639299	-0.0301457	-0.0163375	-0.0545971	0.813996	6.3	2.96323e-06	0.000769597	-0.145693	3.11374
P23368	ME2	NAD-dependent malic enzyme, mitochondrial OS=Homo sapiens OX=9606 GN=ME2 PE=1 SV=1	0.0118768	-0.0118768	0.0248124	0.00546573	0.0303306	-0.0360654	0.0441897	0.00963899	0.0160607	-0.0351562	-0.0415604	0.00127055	0.0170618	0.0435579	0.182568	0.176353	0	0.0177468	0.0198853	0.0920986	-0.00845988	0.0227883	0.0663727	0.0128124	0.860081	3.4409	3.09012e-06	0.000769597	0.178104	3.11374
Q9NVE7	PANK4	4'-phosphopantetheine phosphatase OS=Homo sapiens OX=9606 GN=PANK4 PE=1 SV=1	-0.00661379	0.00661379	0.0109605	-0.00561083	-0.00537937	0.00334342	-0.0137773	0.00873819	-0.01935	-0.0231851	0.00592749	0.0277779	0.035433	0.0321025	0.0722589	0.0846469	0	0.0412937	0.0216348	0.0266171	0.0299273	0.0308047	0.0337195	0.0597635	0.859798	3.38104	3.13371e-06	0.000769597	0.0809746	3.11374
Q9H061	TMEM126A	Transmembrane protein 126A OS=Homo sapiens OX=9606 GN=TMEM126A PE=1 SV=1	-0.0523262	0.0523262	0.0380813	0.107806	0.0792154	0.125035	0.154426	0.131509	0.144858	0.0930931	0.104674	0.167118	0.213115	0.1901	0.231887	0.151567	NA	NA	NA	NA	NA	NA	NA	NA	0.752229	5.96224	3.46379e-06	0.000822303	0.269257	3.08497
P10809	HSPD1	60 kDa heat shock protein, mitochondrial OS=Homo sapiens OX=9606 GN=HSPD1 PE=1 SV=2	-0.000829346	0.000829346	-0.000996527	-0.000727847	0.0243999	-0.00283437	0.0061362	0.00914694	0.0116683	-0.0245322	0.019789	0.00229335	0.00779518	0.035138	0.0801723	0.0993762	0	0.00519396	0.039134	0.0574771	-0.00545497	0.00981912	0.0283916	-0.00357415	0.856145	3.20776	3.7451e-06	0.000860406	0.0866766	3.0653
P0DPB6	POLR1D	DNA-directed RNA polymerases I and III subunit RPAC2 OS=Homo sapiens OX=9606 GN=POLR1D PE=1 SV=1	-0.0174512	0.0174512	0.14982	0.0202443	-0.0517383	0.0550399	0.128882	0.148391	-0.0100698	0.191974	0.271738	0.427624	0.355371	0.275036	0.599235	0.677665	0	0.326254	0.208192	0.409866	0.219768	0.297371	0.352933	0.2743	0.852223	3.46305	4.51206e-06	0.000944396	0.568414	3.02485
P0C1Z6	TFPT	TCF3 fusion partner OS=Homo sapiens OX=9606 GN=TFPT PE=1 SV=1	-0.0107753	0.0107753	-0.0275653	-0.054838	-0.067675	0.0480928	-0.0534639	-0.0679689	0.0355816	0.0785115	0.105475	0.168087	0.217794	0.27184	0.15177	0.192587	0	0.0547442	0.0643688	0.0441461	0.053872	0.0755974	0.108699	0.0467864	0.852189	4.29246	4.51937e-06	0.000944396	0.225125	3.02485
Q6P1R4	DUS1L	tRNA-dihydrouridine(16/17) synthase [NAD(P)(+)]-like OS=Homo sapiens OX=9606 GN=DUS1L PE=1 SV=1	0.012597	-0.012597	-0.0309601	-0.0807879	0.00522935	0.0207236	-0.00462128	-0.0396138	0.0976679	0.118381	0.0626228	-0.0415853	0.120972	0.19749	0.363444	0.352089	0	-0.0339745	-0.0369155	-0.0395008	-0.0059204	-0.0303246	-0.0540696	-0.0283584	0.851665	3.29961	4.63153e-06	0.000944396	0.354719	3.02485
O95786	DDX58	Antiviral innate immune response receptor RIG-I OS=Homo sapiens OX=9606 GN=DDX58 PE=1 SV=2	0.00160691	-0.00160691	-0.0245799	-0.0298894	-0.0382614	-0.0387675	-0.0435619	-0.0652249	-0.0213547	-0.0524526	-0.0411241	-0.0484689	-0.0418382	-0.0469078	-0.0589047	-0.0624629	0	0.00703524	0.035414	0.0424784	0.029351	-0.0123679	0.0201087	-0.0203538	0.815663	6.09675	4.64109e-06	0.000944396	-0.0499283	3.02485
P36957	DLST	Dihydrolipoyllysine-residue succinyltransferase component of 2-oxoglutarate dehydrogenase complex, mitochondrial OS=Homo sapiens OX=9606 GN=DLST PE=1 SV=4	0.00533332	-0.00533332	0.0512779	0.0242202	0.024713	0.0725478	0.029177	0.0552722	0.0272574	0.02735	0.046892	0.0759324	0.0722607	0.0919623	0.101092	0.0842934	0	-0.0350498	-0.000741986	-0.0658178	-0.0378902	-0.0394887	-0.103969	-0.0595423	0.724276	4.83705	5.64756e-06	0.00109262	0.113266	2.96153
P61960	UFM1	Ubiquitin-fold modifier 1 OS=Homo sapiens OX=9606 GN=UFM1 PE=1 SV=1	-0.0120159	0.0120159	0.0327703	0.0280343	0.0167701	0.0589892	0.0342279	0.0742188	0.0572225	0.0269396	0.0560902	0.0714456	0.118549	0.0769971	0.155372	0.181417	0	0.0251815	-0.0854193	0.0500131	0.0265294	-0.030885	0.0119635	-0.0295787	0.832801	3.41712	5.67635e-06	0.00109262	0.135781	2.96153
P29353	SHC1	SHC-transforming protein 1 OS=Homo sapiens OX=9606 GN=SHC1 PE=1 SV=4	-0.00368703	0.00368703	0.0172692	0.0289329	0.0333616	0.00706324	0.0437589	0.0359986	0.0104647	0.0333437	0.0316281	0.054054	0.0409677	0.0357021	0.0747624	0.0661805	0	0.064006	0.0165464	0.0754365	0.00824748	-0.00448918	0.0431467	0.0251258	0.726385	4.37724	6.1046e-06	0.0011416	0.0748518	2.94249
Q8N335	GPD1L	Glycerol-3-phosphate dehydrogenase 1-like protein OS=Homo sapiens OX=9606 GN=GPD1L PE=1 SV=1	0.00453209	-0.00453209	-0.00450264	-0.0323082	0.00618851	-0.00487242	0.0114666	-0.021867	0.0188945	0.000557199	-0.00544876	0.0419279	0.0600363	0.04795	0.0990203	0.0795779	0	0.0312001	0.0228811	0.100462	0.0527966	0.0413114	0.086282	0.0243324	0.845098	3.4457	6.25137e-06	0.0011416	0.0943137	2.94249
P48735	IDH2	Isocitrate dehydrogenase [NADP], mitochondrial OS=Homo sapiens OX=9606 GN=IDH2 PE=1 SV=2	0.016428	-0.016428	-0.0407362	-0.0513692	-0.0221966	-0.0797329	-0.0407718	-0.0463521	-0.0750797	-0.0700792	-0.05454	-0.083093	-0.079328	-0.0818108	-0.0796658	-0.0693819	0	-0.0138253	-0.013312	0.0479917	-0.0416714	-0.0351746	0.0465249	-0.0482474	0.770249	6.3	6.6517e-06	0.00118434	-0.102597	2.92653
Q92597	NDRG1	Protein NDRG1 OS=Homo sapiens OX=9606 GN=NDRG1 PE=1 SV=1	-0.00940561	0.00940561	-0.0295217	-0.0181799	-0.0494146	-0.0274266	-0.0252148	-0.0567169	-0.0485904	-0.0544003	-0.0420582	-0.0264981	-0.0711576	-0.0334099	-0.0786896	-0.0868233	0	-0.0127979	-0.0158323	-0.00669872	-0.00692193	-0.0580511	-0.0553842	-0.0842931	0.714379	4.76246	7.40207e-06	0.00128579	-0.0966209	2.89083
P31040	SDHA	Succinate dehydrogenase [ubiquinone] flavoprotein subunit, mitochondrial OS=Homo sapiens OX=9606 GN=SDHA PE=1 SV=2	0.0265704	-0.0265704	-0.0479786	-0.0419648	-0.0572912	-0.0685017	-0.0473552	-0.0531581	-0.0223374	-0.0647264	-0.066035	-0.0626562	-0.117752	-0.0842672	-0.127375	-0.0975355	0	0.00143592	0.139285	0.0366898	-0.0233413	-0.0245188	-0.00304752	-0.0574011	0.711446	4.97586	8.0513e-06	0.00136527	-0.141981	2.86478
P18031	PTPN1	Tyrosine-protein phosphatase non-receptor type 1 OS=Homo sapiens OX=9606 GN=PTPN1 PE=1 SV=1	-0.0105229	0.0105229	-0.0361818	0.0152598	-0.0116149	0.0291137	-0.0617186	-0.0456616	-0.0491184	-0.0429106	-0.0924711	-0.0909296	-0.102649	-0.100764	-0.0703261	-0.125626	0	0.016954	-0.0239572	0.00610397	-0.0211232	-0.0596394	-0.0491637	-0.015052	0.819811	4.67932	8.60594e-06	0.00140603	-0.103167	2.85201
Q14765	STAT4	Signal transducer and activator of transcription 4 OS=Homo sapiens OX=9606 GN=STAT4 PE=1 SV=1	-0.0272501	0.0272501	-0.022204	0.014748	-0.0567917	0.00625662	-0.0266055	-0.0170448	-0.0587514	-0.0662863	-0.105856	-0.0849572	-0.0820573	-0.0751516	-0.10693	-0.110187	0	-0.00783076	0.0164722	0.0218257	-0.0161792	0.00534819	-0.0112937	-0.000727983	0.788295	4.66654	8.6865e-06	0.00140603	-0.098622	2.85201
P12544	GZMA	Granzyme A OS=Homo sapiens OX=9606 GN=GZMA PE=1 SV=2	0.0103592	-0.0103592	-0.0232403	-0.0440148	-0.0221411	-0.0185794	-0.00807971	-0.0245909	-0.0179142	-0.0473799	-0.0781874	-0.0926306	-0.0714473	-0.0828684	-0.0757738	-0.0676344	0	0.00714452	-0.0313835	-0.130507	0.0271912	0.00965906	0.0211095	-0.0570477	0.825469	4.47818	9.26653e-06	0.00146658	-0.0640275	2.83369
O15247	CLIC2	Chloride intracellular channel protein 2 OS=Homo sapiens OX=9606 GN=CLIC2 PE=1 SV=3	0.0112821	-0.0112821	-0.00716414	0.011501	-0.0114174	0.00425216	0.0263476	-0.0198805	-0.0114265	-0.0199003	0.0531711	0.0623635	0.0500652	0.0748705	0.0496506	0.0842196	0	0.0278064	0.0491563	0.0842829	0.0868159	0.0541061	0.041135	0.0403249	0.83332	4.10757	1.03786e-05	0.0015671	0.067025	2.8049
O15127	SCAMP2	Secretory carrier-associated membrane protein 2 OS=Homo sapiens OX=9606 GN=SCAMP2 PE=1 SV=2	-0.00170317	0.00170317	-0.0148472	0.0052554	-0.0647213	-0.0348467	-0.0457517	-0.0112237	-0.022569	-0.0190013	-0.0672681	-0.0626711	-0.103161	-0.0810672	-0.0672338	-0.103755	0	-0.0658811	-0.0836674	-0.0143375	-0.105448	0.0211363	-0.0619501	-0.0426732	0.734963	4.10582	1.05582e-05	0.0015671	-0.0726934	2.8049
P30047	GCHFR	GTP cyclohydrolase 1 feedback regulatory protein OS=Homo sapiens OX=9606 GN=GCHFR PE=1 SV=3	0.0119058	-0.0119058	0.161245	0.13684	0.162566	0.155951	0.142666	0.172773	0.126263	0.187319	0.193926	0.186953	0.197949	0.16665	0.0672318	0.141368	0	0.291548	0.413698	0.194703	0.239075	0.482997	0.396856	0.293219	0.832151	6.13804	1.08926e-05	0.0015671	0.158468	2.8049
Q86V48	LUZP1	Leucine zipper protein 1 OS=Homo sapiens OX=9606 GN=LUZP1 PE=1 SV=2	0.00481524	-0.00481524	0.048067	0.0518726	0.0392749	0.0395153	0.0331052	0.0636317	0.0497676	0.0532545	0.0438189	0.0539762	0.0482413	0.0762661	0.055454	0.0588481	0	0.0343374	0.034013	0.0413911	0.0191039	0.0284339	0.0378694	0.058883	0.831748	6.3	1.10747e-05	0.0015671	0.0512818	2.8049
Q9ULH0	KIDINS220	Kinase D-interacting substrate of 220 kDa OS=Homo sapiens OX=9606 GN=KIDINS220 PE=1 SV=3	-0.0112281	0.0112281	0.0864557	0.101701	0.0679166	0.127546	0.115697	0.0849463	0.151463	0.109298	0.176386	0.219791	0.135711	0.134531	0.115915	0.147748	0	-0.144841	-0.123599	-0.326975	-0.210847	-0.138937	-0.201539	-0.2195	0.803169	6.3	1.11441e-05	0.0015671	0.187668	2.8049
P46109	CRKL	Crk-like protein OS=Homo sapiens OX=9606 GN=CRKL PE=1 SV=1	0.0181283	-0.0181283	0.0162817	-0.000263513	0.0373174	0.0548779	0.0305672	0.0278744	0.053223	0.0265235	0.0438723	0.0708634	0.0649441	0.0942588	0.0597191	0.0665269	0	0.0298609	0.062054	0.0562825	0.00705838	0.0221004	0.0401487	0.0474215	0.717022	5.07966	1.12219e-05	0.0015671	0.0821663	2.8049
P02675	FGB	Fibrinogen beta chain OS=Homo sapiens OX=9606 GN=FGB PE=1 SV=2	-0.0144855	0.0144855	0.0184465	0.00767682	0.0139664	0.0161952	0.0300963	0.0352401	0.0324742	0.00595563	0.0413919	0.035163	0.0642852	0.0500906	0.0857193	0.0452628	0	-0.00840578	-0.000743173	0.0199987	-0.0149821	-0.0115569	-0.0191593	0.00770672	0.743248	3.89322	1.16658e-05	0.00158319	0.0648266	2.80047
Q7Z3T8	ZFYVE16	Zinc finger FYVE domain-containing protein 16 OS=Homo sapiens OX=9606 GN=ZFYVE16 PE=1 SV=3	0.000210417	-0.000210417	0.00966428	0.0283648	0.00691399	0.0327899	0.0234875	-0.0138557	0.0213122	0.0332513	0.0425953	0.0415496	0.0471281	0.0526692	0.0541118	0.0689162	0	0.0534857	0.0803084	0.0915449	0.0847026	0.0441985	0.0429617	0.0281818	0.762737	3.79525	1.17817e-05	0.00158319	0.0590398	2.80047
A0A2R8YES3	SMARCE1	Isoform of Q969G3, SWI/SNF-related matrix-associated actin-dependent regulator of chromatin subfamily E member 1 OS=Homo sapiens OX=9606 GN=SMARCE1 PE=1 SV=1	0.0424079	-0.0424079	0.239304	0.0639727	0.0322183	0.0660333	0.0863615	0.124946	0.0516725	0.202428	0.231252	0.296675	0.203424	0.293021	0.33391	0.396891	0	0.0543502	0.0293048	0.148838	0.0994418	0.0914031	0.0524782	0.290972	0.745634	3.75966	1.25062e-05	0.00164942	0.33379	2.78267
A6NI61	MYMK	Protein myomaker OS=Homo sapiens OX=9606 GN=MYMK PE=3 SV=1	-0.00167118	0.00167118	0.0403625	0.0251526	0.0412065	0.0365219	0.0814508	0.144961	0.0942898	0.0570165	0.119976	0.0767832	0.0820077	0.117926	0.260565	0.250482	0	-0.00493401	-0.0443882	0.27422	-0.14609	-0.0923378	0.0142685	0.144325	0.760685	3.37154	1.38632e-05	0.00177648	0.194347	2.75044
O60313-2	OPA1	Isoform of O60313, Isoform 2 of Dynamin-like 120 kDa protein, mitochondrial OS=Homo sapiens OX=9606 GN=OPA1 PE=1 SV=3	-0.00379826	0.00379826	-0.033922	-0.042798	-0.0375796	-0.0497063	-0.0898828	-0.0509241	-0.0945442	-0.0273754	-0.0996486	-0.0560918	-0.109095	-0.118493	-0.0697023	-0.0727241	0	-0.0230385	-0.00332298	0.00130295	-0.00512771	-0.00904433	-0.0510826	-0.00113651	0.734984	5.93411	1.40708e-05	0.00177648	-0.109171	2.75044
E5RIL2	CNOT8	Isoform of Q9UFF9, Poly(A)-specific ribonuclease (Fragment) OS=Homo sapiens OX=9606 GN=CNOT8 PE=1 SV=1	0.00879206	-0.00879206	-0.166987	-0.0493492	-0.156187	-0.101379	-0.176707	-0.0841389	-0.0785835	-0.226891	-0.13725	-0.147885	-0.282379	-0.234664	-0.180974	-0.208296	0	-0.00521462	0.0228591	0.0434257	0.0632796	0.0243785	0.0244126	0.0436701	0.712801	6.23982	1.42178e-05	0.00177648	-0.298273	2.75044
Q8N6Q8	METTL25	Methyltransferase-like protein 25 OS=Homo sapiens OX=9606 GN=METTL25 PE=2 SV=2	-0.0121514	0.0121514	0.0571701	-0.002534	-0.0224471	-0.0486446	0.0308699	-0.00632896	-0.0159492	0.0288367	0.174462	0.00329042	0.067215	0.149511	0.278994	0.316917	0	0.0862217	0.0578683	0.127695	0.0446422	0.0800977	0.150342	0.044319	0.823304	3.29596	1.55346e-05	0.00190754	0.280211	2.71953
P09525	ANXA4	Annexin A4 OS=Homo sapiens OX=9606 GN=ANXA4 PE=1 SV=4	0.00497612	-0.00497612	-0.0927399	-0.0624665	-0.0901421	-0.0522585	-0.0640384	-0.0423916	-0.0778649	-0.0636427	-0.173956	-0.0545169	-0.160791	-0.0988494	-0.136626	-0.130115	0	0.0282068	0.236028	-0.122738	0.0364027	0.0386282	0.0994106	0.12577	0.68762	5.31874	1.72457e-05	0.00208176	-0.187236	2.68157
Q9BYX4	IFIH1	Interferon-induced helicase C domain-containing protein 1 OS=Homo sapiens OX=9606 GN=IFIH1 PE=1 SV=3	-0.00605198	0.00605198	-0.00552778	-0.00710072	-0.0445083	-0.0395319	-0.02628	-0.0439944	-0.02039	-0.0129222	-0.0211552	-0.0647374	-0.0749704	-0.044697	-0.0918768	-0.0935042	0	0.0521655	0.051588	0.103581	0.0526232	0.0144182	0.044281	0.0164575	0.733301	3.53565	1.98864e-05	0.00236052	-0.0772468	2.62699
F5H365	SEC23A	Isoform of Q15436, Protein transport protein SEC23 OS=Homo sapiens OX=9606 GN=SEC23A PE=1 SV=1	0.00620542	-0.00620542	-0.0358628	-0.0268489	-0.0350968	-0.0355292	-0.0294661	-0.0473831	-0.0614665	-0.0511263	-0.0690749	-0.113628	-0.0917736	-0.0858658	-0.0368805	-0.0666984	0	0.0199078	0.0149692	0.036333	0.0238905	-0.0190106	0.0280494	0.0193316	0.738625	5.4915	2.0279e-05	0.00236057	-0.0790981	2.62698
F8WBI5	NIPSNAP2	Isoform of O75323, Protein NipSnap homolog 2 OS=Homo sapiens OX=9606 GN=NIPSNAP2 PE=1 SV=1	-0.0352644	0.0352644	-0.00195046	-0.00477537	-0.0478957	-0.0806548	-0.0829663	-0.0856069	-0.0197602	-0.140787	-0.125047	-0.261757	-0.247654	-0.256808	-0.196067	-0.151682	NA	NA	NA	NA	NA	NA	NA	NA	0.757404	4.62591	2.05498e-05	0.00236057	-0.212424	2.62698
Q9BTA9	WAC	WW domain-containing adapter protein with coiled-coil OS=Homo sapiens OX=9606 GN=WAC PE=1 SV=3	0.0311104	-0.0311104	-0.00899216	-0.122094	-0.0362559	-0.105464	-0.124344	-0.0598869	-0.0684951	-0.167452	-0.174508	-0.183452	-0.253693	-0.0968984	-0.216219	-0.153502	0	0.0304005	-0.00217202	0.0372042	-0.00616709	-0.00705958	-0.0256628	0.0312719	0.690479	5.10078	2.12062e-05	0.00239731	-0.225701	2.62028
K7ELQ4	ATF7-NPFF	ATF7-NPFF readthrough, Cyclic AMP-dependent transcription factor ATF-7 OS=Homo sapiens OX=9606 GN=ATF7-NPFF PE=3 SV=1	-0.0562148	0.0562148	0.250287	0.0768686	0.077041	0.204617	0.155068	0.118305	0.151169	0.194268	0.226896	0.341486	0.243635	0.225978	0.251816	0.257278	0	-0.0259073	-0.00583039	-0.0365404	-0.00311306	0.023411	-0.0492417	-0.0441597	0.697823	6.2976	2.34263e-05	0.00260691	0.366956	2.58387
Q01581	HMGCS1	Hydroxymethylglutaryl-CoA synthase, cytoplasmic OS=Homo sapiens OX=9606 GN=HMGCS1 PE=1 SV=2	-0.0396011	0.0396011	0.0789305	0.068786	0.0414825	0.0819713	0.0776801	0.0538622	0.0417858	0.101957	0.0572628	0.0958673	0.126405	0.110434	0.14537	0.190907	0	0.03676	0.0334235	0.055451	0.0933391	0.0561637	0.0932666	0.0791017	0.675044	4.26017	2.43454e-05	0.00266751	0.17145	2.57389
Q15075	EEA1	Early endosome antigen 1 OS=Homo sapiens OX=9606 GN=EEA1 PE=1 SV=2	0.00565648	-0.00565648	0.0270028	0.000232743	0.0189909	0.0222487	0.0195387	0.0126531	0.0421356	0.00326014	0.0533714	0.0253922	0.035465	0.038425	0.0503832	0.0436895	0	0.00948019	0.0183157	0.0309725	0.0298604	0.0153025	0.0170243	0.0078156	0.683248	4.43928	2.4896e-05	0.00267654	0.0540818	2.57243
Q12846	STX4	Syntaxin-4 OS=Homo sapiens OX=9606 GN=STX4 PE=1 SV=2	0.0153238	-0.0153238	-0.0453389	-0.0210561	-0.0432947	-0.122335	-0.0666261	-0.0637156	-0.06372	-0.0712354	-0.0558182	-0.15086	-0.110946	-0.111666	-0.118187	-0.0882323	0	-0.0796641	-0.0928995	-0.122692	-0.122741	-0.103744	-0.0923156	-0.145029	0.696148	6.20478	2.54538e-05	0.00267654	-0.155724	2.57243
P09769	FGR	Tyrosine-protein kinase Fgr OS=Homo sapiens OX=9606 GN=FGR PE=1 SV=2	0.0117926	-0.0117926	-0.0192243	-0.0184439	-0.0324534	-0.0148166	-0.0431158	-0.0484888	-0.0121431	0.00399125	0.0299189	0.0219238	0.0575129	0.0449939	0.0632793	0.0681241	0	-0.0597242	-0.0765264	-0.00498502	-0.055878	-0.00496368	-0.0436474	-0.0288054	0.810095	4.01719	2.55553e-05	0.00267654	0.0794046	2.57243
Q92734	TFG	Protein TFG OS=Homo sapiens OX=9606 GN=TFG PE=1 SV=2	-0.00510759	0.00510759	0.0468756	0.0623556	0.0410309	0.0304207	0.0694661	0.050703	0.0395503	0.0378422	0.0689025	0.0765962	0.0468469	0.0374841	0.0957192	0.0987282	0	0.00912346	0.0148063	0.0180026	0.0119356	0.0270636	-0.0123584	-0.0221269	0.670007	6.3	2.84361e-05	0.0029351	0.104679	2.53238
P80075	CCL8	C-C motif chemokine 8 OS=Homo sapiens OX=9606 GN=CCL8 PE=1 SV=2	0.032041	-0.032041	0.0330621	-0.0164861	0.0338584	0.0397494	0.105548	0.143102	0.131411	0.0809345	0.120576	0.122946	0.115806	0.148735	0.0710866	0.172971	0	0.0396975	-0.00944825	-0.0141483	0.0133137	-0.0128368	-0.0162196	0.0842524	0.80015	5.47742	2.93967e-05	0.00299091	0.118552	2.5242
Q13155	AIMP2	Aminoacyl tRNA synthase complex-interacting multifunctional protein 2 OS=Homo sapiens OX=9606 GN=AIMP2 PE=1 SV=2	-0.0313398	0.0313398	0.0105718	-0.0121359	0.00594605	0.00183664	0.0293127	0.0257297	-0.0168716	-0.00621066	-0.020175	-0.0403726	-0.0854751	-0.0355074	-0.111506	-0.178398	0	0.0279808	-0.030227	0.0896129	-0.00572694	-0.0132983	-0.0235893	-0.0526753	0.805556	3.31715	3.00774e-05	0.00301085	-0.144823	2.52131
Q5STX8	AIF1	Isoform of P55008, Allograft inflammatory factor 1 (Fragment) OS=Homo sapiens OX=9606 GN=AIF1 PE=1 SV=1	-0.00343567	0.00343567	0.0103809	-0.00912311	-0.0109822	0.0073335	-0.023259	0.00250648	-0.0229364	-0.0152845	0.0205719	0.0290887	0.0189285	0.0439054	0.0618425	0.0924445	0	0.000134053	0.0530824	0.059873	0.0469763	0.00917372	0.00182161	0.00537238	0.80522	3.33247	3.04383e-05	0.00301085	0.080199	2.52131
K7EL68	CDC37	Isoform of Q16543, Hsp90 co-chaperone Cdc37 (Fragment) OS=Homo sapiens OX=9606 GN=CDC37 PE=1 SV=1	0.00485618	-0.00485618	0.0703211	0.042143	0.00410444	0.0235464	0.038322	0.0923813	0.0515778	0.0568773	0.194058	0.209707	0.175535	0.116588	0.164795	0.117162	0	0.129137	0.0246618	0.127581	0.00166559	0.0799179	0.0507481	0.00118319	0.799372	4.45357	3.29309e-05	0.00321279	0.135899	2.49312
A0A0A0MTH3	ILK	Isoform of Q13418, 59 kDa serine/threonine-protein kinase OS=Homo sapiens OX=9606 GN=ILK PE=1 SV=1	0.00324108	-0.00324108	-0.0112042	-0.00184515	-0.00595106	-0.00743729	-0.00634514	-0.0200185	-0.0160728	-0.0457253	-0.0366573	-0.0282866	-0.0344098	-0.0304773	-0.0178916	-0.0415381	0	0.0405572	0.0168736	0.0411352	0.0243431	-0.00567702	0.0399698	0.0411045	0.754724	4.91941	3.41929e-05	0.00329084	-0.0287274	2.48269
P34059	GALNS	N-acetylgalactosamine-6-sulfatase OS=Homo sapiens OX=9606 GN=GALNS PE=1 SV=1	0.00298596	-0.00298596	0.0161778	0.00518048	0.060235	0.00817283	0.0579131	0.0743415	0.0773782	0.0383745	0.0655053	0.064313	0.0414331	0.0727153	0.0496952	0.0829663	0	-0.00145393	0.00722538	0.00167584	-0.00866709	0.024397	-0.0284818	-0.0693574	0.782731	5.58235	3.47699e-05	0.00330175	0.061913	2.48126
P42224	STAT1	Signal transducer and activator of transcription 1-alpha/beta OS=Homo sapiens OX=9606 GN=STAT1 PE=1 SV=2	-0.0112495	0.0112495	-0.0304046	-0.00375113	-0.0310212	-0.0272645	-0.0568166	-0.0666834	-0.0563879	-0.0391032	-0.0610404	-0.0227636	-0.0400093	-0.0460656	-0.0648749	-0.0697766	0	0.0396272	0.0333878	0.0646831	0.0508706	0.00510089	0.0471337	0.023351	0.728417	5.70765	3.60415e-05	0.00337526	-0.0517113	2.47169
P07814	EPRS1	Bifunctional glutamate/proline--tRNA ligase OS=Homo sapiens OX=9606 GN=EPRS1 PE=1 SV=5	0.00650895	-0.00650895	-0.00556354	0.0150211	0.000928763	-0.0185011	-0.0285078	-0.0154308	-0.016335	-0.0106557	-0.0145114	-0.0244119	-0.0244415	-0.0357622	-0.038421	-0.0465797	0	0.00348793	-0.0241834	0.0102511	0.000956198	-0.00426696	-0.0347762	-0.00529892	0.723783	3.73979	3.64919e-05	0.00337526	-0.0415971	2.47169
Q99836	MYD88	Myeloid differentiation primary response protein MyD88 OS=Homo sapiens OX=9606 GN=MYD88 PE=1 SV=1	0.00456465	-0.00456465	-0.0525481	-0.0405494	-0.07536	-0.0552948	-0.0276633	-0.0734839	-0.113174	-0.0453659	-0.0926429	-0.112457	-0.0313764	-0.130749	-0.0919438	-0.141138	0	0.00741652	0.018794	0.0509721	0.000588997	-0.0331946	0.00326795	0.0168165	0.666992	6.00915	3.71763e-05	0.00337589	-0.152487	2.47161
E9PGC8	MAP1A	Isoform of P78559, Microtubule-associated protein 1A OS=Homo sapiens OX=9606 GN=MAP1A PE=1 SV=1	0.000204331	-0.000204331	0.0326685	0.0029533	0.0247601	0.0114217	0.008524	0.00868871	0.0213318	0.0186949	0.0441045	0.037006	0.0468762	0.0243822	0.0298965	0.0458297	0	0.0087551	-0.0186746	-0.0714009	-0.00414254	-0.0199372	-0.0028616	-0.0257847	0.66402	4.49876	3.74467e-05	0.00337589	0.0291148	2.47161
Q86V88	MDP1	Magnesium-dependent phosphatase 1 OS=Homo sapiens OX=9606 GN=MDP1 PE=1 SV=1	-0.0254101	0.0254101	0.0512703	0.00312939	0.0383545	0.0415148	0.0434251	0.0351399	0.0549908	0.020388	0.0253179	0.0790126	0.0742379	0.0859902	0.0820559	0.0903765	0	-0.00624212	-0.00114655	-0.0658159	-0.000461961	-0.0164073	-0.0177457	-0.0329596	0.660149	4.50046	3.91053e-05	0.00347801	0.0999069	2.45867
Q14157	UBAP2L	Ubiquitin-associated protein 2-like OS=Homo sapiens OX=9606 GN=UBAP2L PE=1 SV=2	0.00610524	-0.00610524	0.026901	0.0154934	0.019273	0.0313958	0.029041	-0.00410763	0.0389845	0.0366611	0.0319106	0.0339883	0.0364942	0.0389365	0.057547	0.095931	0	0.0741494	0.0549535	0.0906151	0.0839368	0.0623778	0.0754529	0.0761573	0.690284	3.48636	3.98815e-05	0.00347801	0.0606016	2.45867
Q9UKL6	PCTP	Phosphatidylcholine transfer protein OS=Homo sapiens OX=9606 GN=PCTP PE=1 SV=1	-0.00838421	0.00838421	0.031352	0.0257895	0.0333782	0.0686397	0.0240882	0.0337512	0.0187835	0.0468247	0.0120789	0.0568426	0.105213	0.0768363	0.106492	0.11589	0	0.0753023	0.0160487	0.0707577	0.0410441	-0.0102166	0.0491596	-0.00584783	0.720605	3.45871	4.00445e-05	0.00347801	0.0943958	2.45867
P78356	PIP4K2B	Phosphatidylinositol 5-phosphate 4-kinase type-2 beta OS=Homo sapiens OX=9606 GN=PIP4K2B PE=1 SV=1	0.00309049	-0.00309049	0.0743668	0.0621215	0.0589802	0.0574646	0.0776055	0.0584399	0.0585163	0.0820166	0.0479252	0.112269	0.172796	0.0529851	0.110864	0.109676	0	-0.00446104	0.0130714	-0.0147508	0.0322876	-0.0086025	0.0346007	-0.00431336	0.660786	6.24811	4.31428e-05	0.00370197	0.151821	2.43157
Q99567	NUP88	Nuclear pore complex protein Nup88 OS=Homo sapiens OX=9606 GN=NUP88 PE=1 SV=2	0.0268027	-0.0268027	-0.0191669	-0.00793999	0.00416078	-0.0420569	-0.0489572	-0.0233221	-0.0687953	-0.0181038	-0.0575163	-0.0691839	-0.0529973	-0.0874055	-0.0640193	-0.103768	0	-0.0159748	-0.0515125	-0.05394	-0.0422324	-0.0402047	-0.0364494	-0.0315807	0.680904	4.39437	4.46361e-05	0.00378451	-0.0887959	2.42199
Q92945	KHSRP	Far upstream element-binding protein 2 OS=Homo sapiens OX=9606 GN=KHSRP PE=1 SV=4	0.0135706	-0.0135706	0.0310291	0.0109073	0.0210884	0.0322203	0.0284834	0.0183367	0.0246805	0.0327537	0.0369574	0.0491911	0.0279593	0.0265495	0.0414429	0.0508285	0	0.0284922	0.0208543	0.0317192	0.0251255	0.0264167	0.0160228	0.039263	0.667995	6.3	4.66986e-05	0.00391279	0.0577381	2.40751
P08575	PTPRC	Receptor-type tyrosine-protein phosphatase C OS=Homo sapiens OX=9606 GN=PTPRC PE=1 SV=3	-0.0139054	0.0139054	-0.0502619	-0.0355664	0.00605741	-0.0217255	-0.0154418	0.011603	-0.0147507	-0.00708322	-0.047203	-0.0680821	-0.105192	-0.0536325	-0.10661	-0.148998	0	0.0138574	0.0306506	-0.066293	-0.0155534	0.00685503	-0.00908803	0.0550896	0.791861	3.59185	4.80838e-05	0.00395411	-0.116929	2.40295
Q9BPW8	NIPSNAP1	Protein NipSnap homolog 1 OS=Homo sapiens OX=9606 GN=NIPSNAP1 PE=1 SV=1	-0.0100882	0.0100882	0.00442417	-0.0202763	-0.0359878	-0.00350817	0.0367867	-0.0255081	-0.0676345	-0.0231371	-0.131072	-0.0928857	-0.0563078	-0.0824311	-0.11532	-0.0990017	0	0.022564	0.035967	0.12932	0.0484486	0.0116981	0.104047	0.0513568	0.791724	4.51215	4.83021e-05	0.00395411	-0.0917644	2.40295
O75582	RPS6KA5	Ribosomal protein S6 kinase alpha-5 OS=Homo sapiens OX=9606 GN=RPS6KA5 PE=1 SV=1	-0.0165263	0.0165263	-0.0153026	0.0560758	0.0308556	0.0208821	-0.00215268	0.0464209	-0.00774368	0.0119275	-0.0583323	-0.0775235	-0.0652234	-0.0661721	-0.0942078	-0.0617014	0	-0.00471509	-0.00129035	-0.0162314	-0.0250676	-0.0408942	-0.035453	-0.00156087	0.791203	4.32618	4.91399e-05	0.00397698	-0.0854343	2.40045
Q9H9A5	CNOT10	CCR4-NOT transcription complex subunit 10 OS=Homo sapiens OX=9606 GN=CNOT10 PE=1 SV=1	0.0186903	-0.0186903	-0.0236207	-0.0174882	-0.0324824	-0.0671572	-0.0397335	-0.0494676	-0.0191556	-0.0638218	-0.0517868	-0.0358704	-0.0777244	-0.0704004	-0.0562993	-0.0664453	0	-0.0218938	-0.0298882	-0.0230089	-0.00145182	-0.0361783	-0.0478698	-0.0408307	0.664093	6.3	5.30822e-05	0.00424777	-0.0911918	2.37184
Q969E4	TCEAL3	Transcription elongation factor A protein-like 3 OS=Homo sapiens OX=9606 GN=TCEAL3 PE=1 SV=1	0.0139338	-0.0139338	0.0315909	0.0135026	0.0239833	0.0273122	0.0141249	0.0431768	0.0905216	0.0523147	0.0750868	0.0973328	0.0524382	0.104774	0.0428608	0.0775658	0	0.0922475	0.086621	0.0777204	0.0395268	0.0452642	0.0947476	0.0860383	0.719073	4.86906	5.47275e-05	0.00433077	0.0637906	2.36344
P10253	GAA	Lysosomal alpha-glucosidase OS=Homo sapiens OX=9606 GN=GAA PE=1 SV=4	0.0129304	-0.0129304	0.00577993	0.0179237	0.0161845	-0.00997989	0.00834115	-0.00332806	-0.00872885	-0.0116978	0.0128777	0.0348381	0.0215254	0.0441109	0.0664891	0.0858013	0	0.0296678	0.0308424	0.0549541	0.0331263	0.0346454	0.0391457	-0.00687089	0.786739	3.30972	5.68462e-05	0.00444899	0.0729443	2.35174
E9PB61	ALYREF	Isoform of Q86V81, THO complex subunit 4 OS=Homo sapiens OX=9606 GN=ALYREF PE=1 SV=1	0.0100211	-0.0100211	0.0456364	0.034398	0.0102983	0.0631384	0.0305145	0.0409055	0.0445827	0.0496345	0.0585834	0.0703541	0.02224	0.0627933	0.0674679	0.0773058	0	-0.0150354	-0.0423675	-0.00705252	0.0250628	-0.00900541	0.00285799	0.0112307	0.657068	6.3	5.83242e-05	0.00451191	0.0897582	2.34564
Q86WW8	COA5	Cytochrome c oxidase assembly factor 5 OS=Homo sapiens OX=9606 GN=COA5 PE=1 SV=1	-0.0294078	0.0294078	-0.103079	-0.116364	-0.0896788	-0.145747	-0.112302	-0.110679	-0.0990072	-0.130821	-0.0564343	-0.12017	-0.150765	-0.102566	-0.11103	-0.131821	0	-0.0666186	0.00901538	-0.0821861	0.149501	0.0191986	-0.141998	-0.198973	0.785628	6.16952	5.89172e-05	0.00451191	-0.113418	2.34564
Q7LDG7	RASGRP2	RAS guanyl-releasing protein 2 OS=Homo sapiens OX=9606 GN=RASGRP2 PE=1 SV=1	-0.048811	0.048811	-0.0660582	-0.0763133	-0.0136229	-0.0207358	-0.0550056	-0.0801811	-0.0903661	-0.0484262	-0.0945325	-0.112456	-0.154168	-0.096132	-0.17707	-0.275798	0	-0.00410621	-0.0666396	-0.0325231	-0.00730383	-0.0489534	-0.0486137	-0.0359256	0.727729	3.4399	6.06436e-05	0.00459472	-0.184309	2.33774
P07451	CA3	Carbonic anhydrase 3 OS=Homo sapiens OX=9606 GN=CA3 PE=1 SV=3	0.0049257	-0.0049257	-0.0373138	-0.0363793	0.00241248	-0.0427459	-0.0171102	-0.021828	-0.0256734	-0.0342226	-0.0458562	-0.0551262	-0.0326228	-0.0360643	-0.0566992	-0.0655827	0	0.22121	0.209357	0.144343	0.0919943	0.13956	0.128512	0.224785	0.63413	4.89089	6.31908e-05	0.00465681	-0.074223	2.33191
P18859	ATP5PF	ATP synthase-coupling factor 6, mitochondrial OS=Homo sapiens OX=9606 GN=ATP5PF PE=1 SV=1	0.00692452	-0.00692452	0.0316555	0.0198011	0.0189155	0.0724016	0.0996318	0.0677081	0.104013	0.0647056	0.0948093	0.0547035	0.114038	0.110241	0.0506576	0.0760513	0	0.0911029	0.375163	-0.147648	-0.117669	-0.0816976	0.142739	0.273951	0.759356	5.65792	6.3198e-05	0.00465681	0.0848821	2.33191
Q7Z7E8	UBE2Q1	Ubiquitin-conjugating enzyme E2 Q1 OS=Homo sapiens OX=9606 GN=UBE2Q1 PE=1 SV=1	0.00925084	-0.00925084	-0.0204069	-0.0438845	-0.0094822	-0.0484737	-0.0224268	-0.0708642	-0.0465059	-0.0482897	-0.0137368	-0.0361131	-0.0825867	-0.0692691	-0.0687578	-0.100582	0	0.0381691	0.0067891	-0.00276207	-0.00258266	-0.0155865	-0.0272869	0.00695184	0.635482	4.76359	6.34247e-05	0.00465681	-0.103331	2.33191
Q14011	CIRBP	Cold-inducible RNA-binding protein OS=Homo sapiens OX=9606 GN=CIRBP PE=1 SV=1	-0.0120217	0.0120217	0.0257535	0.0193372	-0.00958752	0.0166046	0.0352868	0.0373994	0.0260058	-0.0239455	0.0866998	0.0572749	0.0840303	0.0855268	0.0879612	0.0699519	0	0.0368909	-0.000839076	0.058917	0.0378587	0.0921398	0.00715091	0.0640881	0.782879	4.09125	6.43189e-05	0.00467428	0.0713034	2.33029
E9PSH0	CELF1	Isoform of Q92879, CUGBP Elav-like family member 1 (Fragment) OS=Homo sapiens OX=9606 GN=CELF1 PE=1 SV=1	-0.0210878	0.0210878	-0.0597159	-0.135858	-0.0651112	-0.145559	-0.174469	-0.153002	-0.0283515	-0.0860943	-0.146217	-0.192508	-0.185782	-0.134182	-0.199077	-0.158208	0	-0.0984654	-0.171699	-0.0877464	-0.190751	-0.258377	-0.198709	-0.248618	0.414596	4.20048	6.51124e-05	0.00468415	-0.0992426	2.32937
Q68CQ1	MROH7	Maestro heat-like repeat-containing protein family member 7 OS=Homo sapiens OX=9606 GN=MROH7 PE=2 SV=4	0.0137069	-0.0137069	-0.091416	-0.0541591	-0.157511	-0.0247173	-0.0897521	-0.15372	-0.0144804	-0.0432408	-0.0997336	-0.133939	-0.241641	-0.140422	-0.224793	-0.224041	NA	NA	NA	NA	NA	NA	NA	NA	0.623666	3.86204	6.84959e-05	0.00487828	-0.169524	2.31173
Q9UL25	RAB21	Ras-related protein Rab-21 OS=Homo sapiens OX=9606 GN=RAB21 PE=1 SV=3	0.00836787	-0.00836787	-0.0505478	-0.0414335	-0.0152583	-0.0370547	-0.0346672	-0.0218886	-0.0521518	-0.0445167	-0.0671107	-0.0468262	-0.070299	-0.054632	-0.0591928	-0.0320196	0	-0.121374	-0.0938351	-0.0381164	-0.11721	-0.0994811	-0.116625	-0.137377	0.68161	6.3	6.99798e-05	0.00493462	-0.0720143	2.30675
P20592	MX2	Interferon-induced GTP-binding protein Mx2 OS=Homo sapiens OX=9606 GN=MX2 PE=1 SV=1	0.00641765	-0.00641765	-0.0425738	-0.0396494	-0.069544	-0.0848707	-0.120462	-0.104691	-0.0603828	-0.0694029	-0.0715585	-0.0861318	-0.0609161	-0.104204	-0.0714306	-0.153706	0	-0.0023518	-0.0275057	-0.00150365	-0.0345969	-0.0218299	0.00441217	0.0402718	0.655033	6.3	7.31785e-05	0.0050342	-0.15428	2.29807
Q12766	HMGXB3	HMG domain-containing protein 3 OS=Homo sapiens OX=9606 GN=HMGXB3 PE=2 SV=2	-0.079566	0.079566	0.180926	0.207638	0.167678	0.0752393	0.347612	0.282116	0.180223	0.231205	0.189814	0.324396	0.256327	0.213362	0.285517	0.352135	0	-0.0466531	-0.0802863	-0.0768693	-0.0705318	-0.146711	-0.157377	-0.111726	0.688669	6.3	7.40051e-05	0.0050342	0.332522	2.29807
Q9BXX0	EMILIN2	EMILIN-2 OS=Homo sapiens OX=9606 GN=EMILIN2 PE=1 SV=3	-0.000109774	0.000109774	0.0790321	0.0468095	0.055988	0.0337368	-0.0255094	0.105943	0.113732	0.0872611	0.230294	0.206148	0.208411	0.062124	0.167951	0.199729	0	-0.070581	-0.124649	-0.0650398	-0.0287579	-0.0701335	-0.136686	-0.23019	0.708679	4.51772	7.4973e-05	0.0050342	0.149512	2.29807
Q6VEQ5	WASH2P	WAS protein family homolog 2 OS=Homo sapiens OX=9606 GN=WASH2P PE=2 SV=2	0.00475447	-0.00475447	0.0781145	0.064605	0.0177104	0.114025	0.102984	0.0266795	0.0513805	0.0866254	0.067228	0.114475	0.0959579	0.102868	0.12224	0.0956617	0	-0.0278317	-0.0170656	-0.00724482	-0.057117	-0.0314451	0.00273747	-0.0448937	0.648638	6.3	7.50945e-05	0.0050342	0.14462	2.29807
E9PF32	DENND3	Isoform of A2RUS2, DENN domain-containing protein 3 OS=Homo sapiens OX=9606 GN=DENND3 PE=1 SV=1	-0.00739216	0.00739216	-0.0194715	-0.0141481	-0.0375118	-0.017483	-0.112015	-0.0749947	-0.0584633	-0.0545632	-0.0704862	-0.0968055	-0.0668003	-0.0638243	-0.0594671	-0.167786	0	-0.0213114	-0.0276421	-0.010098	0.00945314	0.00409759	-0.048348	-0.0461383	0.663977	5.47682	7.53383e-05	0.0050342	-0.0769198	2.29807
Q5JSZ5	PRRC2B	Protein PRRC2B OS=Homo sapiens OX=9606 GN=PRRC2B PE=1 SV=2	-0.00429371	0.00429371	0.138864	0.0633235	0.0670242	0.114085	0.0853228	0.0819142	0.125612	0.0941877	0.0980546	0.071629	0.0872527	0.104013	0.126127	0.159707	0	-0.0337421	-0.0117275	0.0326778	0.0502337	-0.0155182	-0.0604749	-0.0343562	0.74937	6.3	7.56332e-05	0.0050342	0.101258	2.29807
D6RGX2	UFSP2	Isoform of Q9NUQ7, Ufm1-specific protease 2 OS=Homo sapiens OX=9606 GN=UFSP2 PE=1 SV=1	0.0523629	-0.0523629	-0.103392	-0.0932737	-0.0859338	-0.0277615	-0.119	-0.0919576	-0.05848	-0.0708811	-0.119249	-0.154312	-0.123506	-0.100443	-0.233691	-0.282805	0	-0.0986628	-0.0574624	-0.0511502	-0.0621917	-0.0905337	-0.0696017	-0.109781	0.65049	3.4274	7.70062e-05	0.00507813	-0.195242	2.2943
Q8IYB8	SUPV3L1	ATP-dependent RNA helicase SUPV3L1, mitochondrial OS=Homo sapiens OX=9606 GN=SUPV3L1 PE=1 SV=1	0.0265617	-0.0265617	-0.0576074	-0.0268318	-0.0402231	-0.0960071	-0.0521678	-0.045385	-0.0951181	-0.0717307	-0.0737825	-0.104505	-0.098085	-0.0952127	-0.0616213	-0.08074	0	-0.0483708	-0.0509389	-0.14172	-0.0912815	-0.0877565	-0.113282	-0.0710035	0.705423	6.3	7.84424e-05	0.0050789	-0.109194	2.29423
P43897	TSFM	Elongation factor Ts, mitochondrial OS=Homo sapiens OX=9606 GN=TSFM PE=1 SV=2	-0.00791142	0.00791142	-0.0785408	-0.038731	0.00767274	-0.0960365	-0.0580674	-0.0418569	-0.0997308	-0.0569252	-0.0806239	-0.116353	-0.148008	-0.111024	-0.089442	-0.0763045	0	0.0166363	0.03897	0.00397148	-0.0147717	-0.0104287	0.0291938	-0.0227609	0.647222	6.042	7.84441e-05	0.0050789	-0.151945	2.29423
B0I1T2	MYO1G	Unconventional myosin-Ig OS=Homo sapiens OX=9606 GN=MYO1G PE=1 SV=2	-0.00731189	0.00731189	-0.0380317	-0.0386642	-0.0429007	-0.00568004	-0.0383695	-0.0322522	-0.0700425	-0.0316491	-0.0532235	-0.0346511	-0.0681336	-0.0352956	-0.0645559	-0.0444582	0	-0.0372118	-0.057795	-0.0722554	-0.0457958	-0.0913363	-0.0938001	-0.0644482	0.660076	6.3	8.11616e-05	0.00520751	-0.0711604	2.28337
Q96RP9	GFM1	Elongation factor G, mitochondrial OS=Homo sapiens OX=9606 GN=GFM1 PE=1 SV=2	0.0247724	-0.0247724	-0.0472708	-0.0216741	0.0118596	-0.0587747	-0.00762901	-0.0642871	-0.0690407	-0.0811646	-0.0743591	-0.0598606	-0.103497	-0.112101	-0.0666824	-0.0812441	0	-0.028488	0.0184552	0.0461217	-0.0136346	-0.00502471	0.0288805	-0.0470473	0.648593	5.04498	8.28378e-05	0.00522824	-0.0896143	2.28164
A0A5F9ZHP1	ASCC1	Isoform of Q8N9N2, Activating signal cointegrator 1 complex subunit 1 OS=Homo sapiens OX=9606 GN=ASCC1 PE=1 SV=1	-0.00629837	0.00629837	-0.0421984	-0.0668842	-0.0191856	-0.100041	-0.0957338	-0.0245151	-0.0583653	-0.0545459	-0.0632902	-0.0556078	-0.0761326	-0.10668	-0.174402	-0.0997039	0	0.0155506	-0.0878126	-0.0287678	-0.0412452	-0.130572	-0.107892	-0.00103406	0.621596	4.65449	8.3472e-05	0.00522824	-0.157289	2.28164
Q9BV57	ADI1	1,2-dihydroxy-3-keto-5-methylthiopentene dioxygenase OS=Homo sapiens OX=9606 GN=ADI1 PE=1 SV=1	0.00318221	-0.00318221	-0.00835326	0.00585812	0.054728	0.0287334	0.092292	0.0343009	0.0533312	0.043545	0.0549546	0.0463651	0.0870911	0.0645358	0.105017	0.0362189	0	0.00704308	-0.0395228	0.0872813	0.0403093	0.0238255	0.0180001	0.00353874	0.706661	5.56007	8.36871e-05	0.00522824	0.0621842	2.28164
P28907	CD38	ADP-ribosyl cyclase/cyclic ADP-ribose hydrolase 1 OS=Homo sapiens OX=9606 GN=CD38 PE=1 SV=2	0.0397073	-0.0397073	-0.0379546	-0.0764558	-0.046137	-0.0324004	-0.0264908	-0.0111041	0.0356862	-0.00341596	-0.02682	0.0198168	-0.0504393	-0.0665954	-0.190081	-0.203443	0	0.157046	-0.108777	-0.173523	-0.0146405	-0.116174	-0.177845	-0.133574	0.773712	3.46546	8.54848e-05	0.00529411	-0.1821	2.27621
O00186	STXBP3	Syntaxin-binding protein 3 OS=Homo sapiens OX=9606 GN=STXBP3 PE=1 SV=2	0.00358323	-0.00358323	-0.0508352	-0.0176719	0.0161308	0.0445462	0.0371261	0.0011069	0.0142106	0.0233025	-0.0786096	-0.0398568	-0.0723092	-0.068557	-0.126531	-0.121369	0	0.0237829	0.00410417	0.0256354	0.010543	-0.0156283	0.0497195	0.029028	0.773086	3.76737	8.71221e-05	0.00531131	-0.123197	2.2748
Q96RQ3	MCCC1	Methylcrotonoyl-CoA carboxylase subunit alpha, mitochondrial OS=Homo sapiens OX=9606 GN=MCCC1 PE=1 SV=3	-0.00775622	0.00775622	-0.0396468	-0.040462	-0.020134	-0.0765902	-0.0196618	-0.0510513	-0.0863877	-0.0753423	-0.0932533	-0.0347447	-0.052687	-0.0606306	-0.0713379	-0.0930294	0	0.00568732	-0.0130097	0.0642477	-0.0353088	0.0110768	0.0388896	0.0101204	0.655534	6.3	8.75792e-05	0.00531131	-0.0986564	2.2748
O43739	CYTH3	Cytohesin-3 OS=Homo sapiens OX=9606 GN=CYTH3 PE=1 SV=2	-0.0415099	0.0415099	-0.0376689	0.212861	0.0634442	0.179531	0.0866593	0.250398	0.0985651	0.172936	0.0843569	0.54512	0.410629	0.53041	0.387988	0.722272	NA	NA	NA	NA	NA	NA	NA	NA	0.705947	3.68289	8.89616e-05	0.00531131	0.539729	2.2748
Q9BZZ2	SIGLEC1	Sialoadhesin OS=Homo sapiens OX=9606 GN=SIGLEC1 PE=1 SV=2	-0.027952	0.027952	0.0108594	-0.00758682	0.0484819	0.0175647	0.0313576	-0.0349194	0.0735916	0.0238158	0.126713	0.077037	0.103682	0.0934777	0.103359	0.121846	0	-0.0246076	-0.0112044	-0.04815	-0.00695941	-0.0111625	-0.0308499	-0.0234548	0.771386	4.50896	8.93397e-05	0.00531131	0.097779	2.2748
Q8N5F7	NKAP	NF-kappa-B-activating protein OS=Homo sapiens OX=9606 GN=NKAP PE=1 SV=1	0.0531853	-0.0531853	0.0322501	-0.0466143	-0.0104981	0.0255395	-0.00117985	0.0155094	0.0877476	0.080562	0.117086	0.0833251	0.135955	0.116389	0.130499	0.16292	0	-0.109537	-0.0899011	-0.150301	-0.0288391	-0.00720302	-0.129024	-0.0161012	0.763926	4.51785	8.94913e-05	0.00531131	0.140367	2.2748
A0A669KB89	SCRIB	Isoform of Q14160, Protein scribble homolog OS=Homo sapiens OX=9606 GN=SCRIB PE=1 SV=1	0.0129594	-0.0129594	0.0867378	0.0791588	0.0239228	0.0442285	0.0104658	0.0119806	0.0400471	0.0414486	0.0840894	0.0973768	0.17391	0.123574	0.116399	0.178111	0	0.0347918	0.0587209	0.0586684	0.0414549	0.0200144	0.0907491	0.0383675	0.761458	4.02353	9.07899e-05	0.00534385	0.124442	2.27215
P17026	ZNF22	Zinc finger protein 22 OS=Homo sapiens OX=9606 GN=ZNF22 PE=1 SV=3	-0.00176729	0.00176729	-0.064436	-0.00328346	-0.0321453	-0.0270918	-0.0468603	-0.0243309	-0.0381624	-0.0993873	-0.0169271	-0.00627125	-0.168926	-0.0651885	-0.267212	-0.167378	0	-0.0382541	-0.0376135	-0.0950309	-0.0567108	0.0723357	-0.156941	-0.0729313	0.77052	3.51827	9.41263e-05	0.00549482	-0.191662	2.26005
E9PPN1	TSEN15	Isoform of Q8WW01, tRNA-splicing endonuclease subunit Sen15 OS=Homo sapiens OX=9606 GN=TSEN15 PE=1 SV=1	-0.010649	0.010649	-0.0705051	0.111984	0.0876733	0.0965825	0.0975007	0.14078	0.138692	0.104951	0.0785496	0.171998	0.0411016	0.218011	0.237458	0.248891	0	0.00362923	0.107886	0.000145853	0.0975691	0.101503	0.0849911	0.0784557	0.626187	4.20336	9.54829e-05	0.00552869	0.259359	2.25738
P40200	CD96	T-cell surface protein tactile OS=Homo sapiens OX=9606 GN=CD96 PE=1 SV=2	-0.0294493	0.0294493	0.186926	0.130624	0.13821	0.154762	0.191599	0.0946723	0.083193	0.150319	0.150353	0.341569	0.245848	0.13792	0.211617	0.378994	NA	NA	NA	NA	NA	NA	NA	NA	0.614665	5.50763	9.65562e-05	0.00554575	0.369042	2.25604
Q9Y277	VDAC3	Voltage-dependent anion-selective channel protein 3 OS=Homo sapiens OX=9606 GN=VDAC3 PE=1 SV=1	0.0244117	-0.0244117	-0.250037	-0.19854	-0.127163	-0.0856955	-0.218672	-0.130451	-0.102101	-0.0393559	-0.311874	-0.297228	-0.454137	-0.174263	-0.380445	-0.332673	0	-0.289277	-0.0846023	-0.630922	-0.19588	-0.287573	-0.275075	-0.0930312	0.607856	4.09547	0.000100658	0.00567933	-0.239403	2.2457
B0QZ18	CPNE1	Isoform of Q99829, Copine-1 OS=Homo sapiens OX=9606 GN=CPNE1 PE=1 SV=1	-0.0165798	0.0165798	-0.114226	-0.0532216	-0.064979	-0.0471409	-0.0549421	-0.0825359	-0.109774	-0.109135	-0.0573338	-0.11043	-0.0716701	-0.103999	-0.0876085	-0.125356	0	0.0227953	-0.00229983	-0.0435334	0.011513	0.0205137	-0.0477224	-0.0686737	0.691901	6.3	0.000100751	0.00567933	-0.110486	2.2457
A0A087WZE9	HMGN3	Isoform of Q15651, High mobility group nucleosome-binding domain-containing protein 3 OS=Homo sapiens OX=9606 GN=HMGN3 PE=1 SV=1	0.0193505	-0.0193505	0.00924488	0.0160224	0.0435548	0.0528254	-0.012402	0.0383895	0.0825571	0.05503	0.0525493	0.0942286	0.0659583	0.0442464	0.0712057	0.104408	0	0.0910637	-0.0353268	-0.0899051	0.110493	0.00722665	0.0523929	0.105252	0.60998	4.66181	0.000101274	0.00567933	0.0573595	2.2457
Q9C002	NMES1	Normal mucosa of esophagus-specific gene 1 protein OS=Homo sapiens OX=9606 GN=NMES1 PE=1 SV=1	0.0874443	-0.0874443	0.0211819	-0.00959019	0.0811884	0.0910012	0.0594702	0.0312658	0.149953	0.0266668	0.19181	0.171443	0.168779	0.162491	0.227651	0.183365	0	0.0459134	0.0350042	-0.111822	-0.0613682	-0.0333964	0.146861	0.185504	0.658799	4.39321	0.00010243	0.00569507	0.209501	2.2445
P55081	MFAP1	Microfibrillar-associated protein 1 OS=Homo sapiens OX=9606 GN=MFAP1 PE=1 SV=2	0.00587568	-0.00587568	0.0174482	0.0224265	0.0135177	0.0544126	0.0326312	0.0170408	0.0501964	0.0373372	0.077032	0.0353273	0.0344735	0.0361401	0.051876	0.0471418	0	0.00924064	0.0378658	0.0382671	0.025721	0.0895049	0.0546012	0.0304246	0.656541	6.1442	0.000103666	0.00569507	0.0608196	2.2445
G5E972	TMPO	Isoform of P42166, Lamina-associated polypeptide 2, isoforms beta/gamma OS=Homo sapiens OX=9606 GN=TMPO PE=1 SV=1	-0.17146	0.17146	0.185707	0.0806704	0.012604	0.370153	0.203434	0.305772	0.300694	0.146803	0.158276	0.364567	0.37661	0.362977	0.573586	0.582444	0	0.205976	0.119602	0.309486	0.0958396	0.21051	0.0484737	0.217259	0.628691	3.80399	0.000103954	0.00569507	0.53048	2.2445
P24844	MYL9	Myosin regulatory light polypeptide 9 OS=Homo sapiens OX=9606 GN=MYL9 PE=1 SV=4	-0.0106935	0.0106935	0.0836272	0.0496152	0.0374655	0.0539074	0.106907	0.0461951	0.0338403	0.0440854	0.0795031	0.0606206	0.101401	0.0728204	0.155414	0.0789257	0	0.0321229	0.0253707	0.0371007	-0.00110248	0.00368636	0.0463935	0.0640693	0.605949	4.99379	0.000110413	0.00594067	0.144292	2.22616
P49427	CDC34	Ubiquitin-conjugating enzyme E2 R1 OS=Homo sapiens OX=9606 GN=CDC34 PE=1 SV=2	-0.00487099	0.00487099	0.0046139	-0.00907905	0.00121113	0.00129702	-0.0605356	-0.0175559	-0.00997916	0.0314793	0.027379	0.0232876	0.0541905	0.0453936	0.105016	0.0715635	0	0.0826739	0.125277	0.108376	0.0398592	0.115061	0.0449018	0.0898321	0.765085	3.57098	0.000110553	0.00594067	0.0933707	2.22616
P62140	PPP1CB	Serine/threonine-protein phosphatase PP1-beta catalytic subunit OS=Homo sapiens OX=9606 GN=PPP1CB PE=1 SV=3	0.0160822	-0.0160822	-0.0288501	-0.0148017	-0.0316704	-0.0169364	-0.0191467	-0.0262864	-0.0426689	-0.0809141	-0.047646	-0.0910373	-0.0430759	-0.0512394	-0.0907518	-0.0418119	0	0.0227468	0.0162125	0.0614659	0.0085091	-0.00527462	-0.0267121	-0.0719499	0.63612	4.93829	0.000110939	0.00594067	-0.0496142	2.22616
Q9UNA1	ARHGAP26	Rho GTPase-activating protein 26 OS=Homo sapiens OX=9606 GN=ARHGAP26 PE=1 SV=1	0.0116563	-0.0116563	-0.0165352	-0.0117901	-0.0321899	-0.00124684	-0.061601	-0.00714825	-0.0261021	-0.0365617	-0.0771106	-0.0171665	-0.0540601	-0.0402619	-0.0657119	-0.100372	0	0.00456052	-0.0168614	-0.0269391	0.00897705	0.00377225	-0.00196695	-0.0257373	0.6439	3.70337	0.000112844	0.00599757	-0.0757906	2.22202
Q9H2P9	DPH5	Diphthine methyl ester synthase OS=Homo sapiens OX=9606 GN=DPH5 PE=1 SV=2	-0.0215454	0.0215454	0.094041	-0.024179	0.0574402	0.0738836	0.032129	0.0322841	0.0520715	0.0394407	0.0734832	0.0728964	0.0483733	0.0789167	0.207447	0.247065	0	0.0253249	0.000426375	-0.0350372	0.0382785	-0.0332971	-0.0597722	-0.0361944	0.764012	3.18022	0.00011407	0.00601785	0.190615	2.22056
B1AKV4	UQCC1	Isoform of Q9NVA1, Ubiquinol-cytochrome-c reductase complex assembly factor 1 OS=Homo sapiens OX=9606 GN=UQCC1 PE=1 SV=1	-0.0231167	0.0231167	0.00724167	-2.15763e-06	0.0135896	0.024655	0.0594063	-0.0366569	-0.000331254	0.0770224	0.0553237	-0.0273277	0.0868352	0.103746	0.201108	0.151495	0	0.131146	0.214895	0.214358	0.2499	0.0923638	0.34141	0.174283	0.762377	3.52356	0.000119607	0.00626356	0.164336	2.20318
Q99996-1	AKAP9	Isoform of Q99996, Isoform 1 of A-kinase anchor protein 9 OS=Homo sapiens OX=9606 GN=AKAP9 PE=1 SV=4	0.00352858	-0.00352858	0.0221308	0.0292564	0.0101424	0.0135474	0.00984355	-0.00230993	0.00969793	0.0311623	0.0384896	0.0599766	0.0594831	0.0382015	0.0371967	0.0454757	0	-0.0185786	-0.0278163	-0.0242557	-0.0196488	-0.0153065	-0.0211224	-0.012087	0.742363	4.48484	0.000121716	0.00632746	0.0382104	2.19877
P17844	DDX5	Probable ATP-dependent RNA helicase DDX5 OS=Homo sapiens OX=9606 GN=DDX5 PE=1 SV=1	-0.00587694	0.00587694	-0.0150811	0.0088834	-0.0357976	-0.00738106	-0.0128215	-0.0177522	-0.0542306	-0.00254838	-0.0530002	-0.0501169	-0.0337026	-0.033558	-0.0398588	-0.0581476	0	-0.059557	-0.0673167	-0.0570784	-0.0572683	-0.0660267	-0.0814126	-0.055819	0.634021	4.91894	0.000126515	0.00652927	-0.0475798	2.18514
Q9NP61	ARFGAP3	ADP-ribosylation factor GTPase-activating protein 3 OS=Homo sapiens OX=9606 GN=ARFGAP3 PE=1 SV=1	0.0131858	-0.0131858	0.0246469	0.0618423	0.0385347	0.0181938	0.00527018	0.0410892	0.0318357	0.0350925	0.0402363	0.0587213	0.036352	0.0484415	0.0817699	0.0871488	0	0.0126253	-0.0132591	0.0066624	0.0352288	0.0126215	0.00662177	0.0348873	0.604538	4.00428	0.000130329	0.00667772	0.0791926	2.17537
Q9Y2Y0	ARL2BP	ADP-ribosylation factor-like protein 2-binding protein OS=Homo sapiens OX=9606 GN=ARL2BP PE=1 SV=1	-0.00840015	0.00840015	-0.0434373	-0.0567134	0.0158371	0.043832	-0.0400416	0.0186954	0.0256443	-0.0228825	-0.000626655	0.0312724	0.107743	0.142014	0.0811547	0.110479	0	-0.00116068	-0.0286118	-0.0953071	-0.017487	-0.0340382	-0.0426181	0.00154329	0.757907	3.92279	0.00013594	0.00691545	0.115288	2.16018
Q86U42	PABPN1	Polyadenylate-binding protein 2 OS=Homo sapiens OX=9606 GN=PABPN1 PE=1 SV=3	-0.0102574	0.0102574	0.00675176	0.0153344	0.015256	0.0618857	0.0460076	0.0643533	0.0451868	0.0238032	0.0449975	0.0115618	0.0549049	0.0502185	0.0670883	0.0716836	0	0.0153809	-0.0174864	0.00351838	-0.0162214	0.042463	0.0491133	0.084891	0.602136	5.9153	0.000138455	0.00695254	0.0849699	2.15786
P35270	SPR	Sepiapterin reductase OS=Homo sapiens OX=9606 GN=SPR PE=1 SV=1	0.0242419	-0.0242419	-0.028013	0.0139961	-0.0398691	0.0505256	-0.0366785	-0.0367808	0.00920654	0.0425103	-0.0881199	0.0637474	0.0966083	0.0974451	0.181213	0.193446	0	0.0253315	0.00853295	0.0239535	0.0689306	0.00751328	0.0865531	0.0109752	0.757217	3.52825	0.000138621	0.00695254	0.190866	2.15786
P27824	CANX	Calnexin OS=Homo sapiens OX=9606 GN=CANX PE=1 SV=2	0.00873784	-0.00873784	-0.105304	-0.0514769	-0.016916	-0.0308754	-0.134614	-0.0793972	-0.0399353	-0.0418953	-0.0834503	-0.0910272	-0.122997	-0.0596323	-0.13949	-0.155419	0	-0.0372747	0.116749	-0.095132	-0.104888	-0.0675722	-0.0585834	0.0202109	0.596983	4.74258	0.000143092	0.00712249	-0.173638	2.14737
A0A0A0MSI2	PHC2	Isoform of Q8IXK0, Polyhomeotic-like protein 2 OS=Homo sapiens OX=9606 GN=PHC2 PE=1 SV=1	-0.00812356	0.00812356	0.0368503	0.0512389	0.00399768	0.0152134	0.0958515	0.114879	0.207978	0.14582	0.117694	0.207296	0.0607295	0.111717	0.113409	0.143046	0	0.110765	0.110552	0.23548	0.0775336	0.0719975	0.627154	0.293162	0.755864	5.0511	0.00014401	0.00712249	0.125051	2.14737
Q6NTE8	MRNIP	MRN complex-interacting protein OS=Homo sapiens OX=9606 GN=MRNIP PE=1 SV=2	0.0106473	-0.0106473	-0.00595293	-0.0288526	0.045306	0.0485515	0.0417928	0.00993678	0.00810419	0.0321513	0.112654	0.0968374	0.137958	0.0765403	0.104592	0.0615213	0	0.00815518	0.000565218	0.0102288	0.0212936	0.0144934	0.0194721	0.0378329	0.741848	4.41516	0.000145433	0.00714325	0.0872815	2.1461
P09543	CNP	2',3'-cyclic-nucleotide 3'-phosphodiesterase OS=Homo sapiens OX=9606 GN=CNP PE=1 SV=2	-0.00270594	0.00270594	-0.0267215	-0.0508908	-0.083064	-0.0430643	-0.0945374	-0.0823112	-0.0759313	-0.0573025	-0.0722789	-0.0978301	-0.0713337	-0.0351101	-0.0528195	-0.0539901	0	-0.0126194	0.0636123	0.00734343	0.00528123	0.00137849	-0.00253854	0.0116764	0.75487	6.04245	0.000148085	0.00718288	-0.0689917	2.1437
P62136	PPP1CA	Serine/threonine-protein phosphatase PP1-alpha catalytic subunit OS=Homo sapiens OX=9606 GN=PPP1CA PE=1 SV=1	0.0214903	-0.0214903	-0.00626164	-0.0263298	-0.0352248	-0.0779286	-0.0505535	-0.0691933	-0.0183497	-0.0559724	-0.0588895	-0.0601358	-0.0742097	-0.0496356	-0.0754144	-0.0642088	0	0.0354829	0.0321229	0.060495	0.0335957	0.0129189	0.0275932	0.0841704	0.674664	5.90953	0.000148257	0.00718288	-0.0576532	2.1437
P12259	F5	Coagulation factor V OS=Homo sapiens OX=9606 GN=F5 PE=1 SV=4	-0.02092	0.02092	0.00158822	0.019352	0.0866112	0.114816	0.142408	0.0950175	0.0357454	0.0938286	0.0616426	0.19931	0.147197	0.104528	0.151121	0.112072	0	-0.0640373	-0.0170898	-0.00288432	-0.0241587	0.00866449	-0.0479592	-0.017033	0.677947	5.74531	0.000149919	0.00719286	0.114279	2.1431
Q5JS37	NHLRC3	NHL repeat-containing protein 3 OS=Homo sapiens OX=9606 GN=NHLRC3 PE=2 SV=1	-0.186235	0.186235	-0.0306256	0.0225754	-0.00122414	-0.0384193	0.0290386	-0.0657297	-0.00657568	-0.264164	-0.283208	-0.921915	-0.606998	-0.544341	-0.680496	-1.23167	0	0.0627558	-0.000768588	-0.0766418	-0.113461	-0.270798	-0.365949	-0.413863	0.754295	3.91091	0.000150482	0.00719286	-0.918734	2.1431
Q7L1S5	CHST9	Carbohydrate sulfotransferase 9 OS=Homo sapiens OX=9606 GN=CHST9 PE=2 SV=2	-0.0772465	0.0772465	0.269935	0.222244	0.0273859	0.162231	0.466606	0.177538	0.163609	0.135067	0.170255	0.362371	0.270358	0.341316	0.629701	0.592982	NA	NA	NA	NA	NA	NA	NA	NA	0.613	3.43347	0.000159516	0.00749945	0.466834	2.12497
Q6UUV9	CRTC1	CREB-regulated transcription coactivator 1 OS=Homo sapiens OX=9606 GN=CRTC1 PE=1 SV=2	-0.00449163	0.00449163	0.0292187	0.060674	0.0551398	-0.00647517	0.0461692	0.00313118	0.0452579	0.0801366	0.0124149	0.109336	0.0585149	0.111165	0.116724	0.106779	0	0.0771698	0.00678196	0.0339597	-0.0617834	0.00849586	0.0170197	-0.00592727	0.619606	3.80069	0.000161116	0.00749945	0.104828	2.12497
Q9UBQ7	GRHPR	Glyoxylate reductase/hydroxypyruvate reductase OS=Homo sapiens OX=9606 GN=GRHPR PE=1 SV=1	0.00917069	-0.00917069	-0.00933271	-0.00303305	-0.0136782	-0.00630414	-0.00016277	-0.0102752	-0.0282834	-0.0455676	-0.0399312	-0.0345707	-0.0195499	-0.0332467	-0.0222343	-0.045613	0	0.0249798	0.0208717	0.0279909	0.00801087	-0.000193986	0.0168205	-0.00398347	0.751814	4.84685	0.000161225	0.00749945	-0.0296172	2.12497
Q5JS54	PSMG4	Proteasome assembly chaperone 4 OS=Homo sapiens OX=9606 GN=PSMG4 PE=1 SV=2	0.0265203	-0.0265203	-4.09326e-05	-0.00570801	0.0553944	0.061838	-0.0398984	0.0560119	0.126042	-0.00266886	0.173608	0.140163	0.0993315	0.140074	0.138017	0.161253	NA	NA	NA	NA	NA	NA	NA	NA	0.720415	4.49806	0.000161743	0.00749945	0.129317	2.12497
Q9BVS4	RIOK2	Serine/threonine-protein kinase RIO2 OS=Homo sapiens OX=9606 GN=RIOK2 PE=1 SV=2	-0.076088	0.076088	0.236565	0.074998	0.183715	0.188168	0.204158	0.168712	0.120333	0.168094	0.144328	0.394136	0.26569	0.242458	0.247848	0.264096	0	0.0848333	-0.0218018	-0.00923971	0.0138804	-0.0384875	-0.0396291	-0.0831928	0.628113	6.3	0.000162162	0.00749945	0.330843	2.12497
P31152	MAPK4	Mitogen-activated protein kinase 4 OS=Homo sapiens OX=9606 GN=MAPK4 PE=1 SV=2	0.0215272	-0.0215272	-0.239204	-0.0884832	-0.00132343	-0.0672892	-0.153112	0.0140591	-0.0194549	0.125689	-0.276804	-0.199016	-0.457429	-0.272099	-0.35597	-0.57283	0	0.00703797	0.283592	-0.54477	-0.137859	-0.0412254	-0.09107	0.148111	0.751004	4.00672	0.000164868	0.0075754	-0.378841	2.12059
M0QY76	ZFP36	Isoform of P26651, Zinc finger protein 36, C3H type, homolog (Mouse), isoform CRA_a OS=Homo sapiens OX=9606 GN=ZFP36 PE=1 SV=1	-0.00759895	0.00759895	-0.00429398	-0.032811	-0.0299607	0.0102565	0.0645368	-0.00507578	0.0950395	0.0861244	0.0250163	0.0771079	0.151929	0.0816202	0.103555	0.0974095	0	-0.015892	-0.0329744	0.0459407	0.0236859	0.0121841	0.027885	0.104203	0.744946	4.9756	0.000166326	0.00759341	0.0968296	2.11956
A0A1B0GTG4	RASSF5	Isoform of Q8WWW0, Ras association domain-containing protein 5 OS=Homo sapiens OX=9606 GN=RASSF5 PE=1 SV=1	-0.00240655	0.00240655	0.121932	0.206902	0.0974334	0.0715275	0.128763	0.305	0.16811	0.130559	0.318148	0.18398	0.135727	0.220679	0.194556	0.270095	NA	NA	NA	NA	NA	NA	NA	NA	0.642052	6.3	0.00017175	0.00779108	0.275718	2.1084
Q9UGN4	CD300A	CMRF35-like molecule 8 OS=Homo sapiens OX=9606 GN=CD300A PE=1 SV=2	0.01447	-0.01447	0.0537788	0.000830446	0.0206519	-0.00218161	-0.0473617	-0.000898742	-0.115521	-0.0787686	-0.0616522	-0.0705887	-0.0545472	-0.150113	-0.0852104	-0.15622	0	0.065069	-0.038806	-0.022731	0.033653	-0.0548769	0.115411	0.027921	0.745857	4.96108	0.000189705	0.00854639	-0.105717	2.06822
P02679	FGG	Fibrinogen gamma chain OS=Homo sapiens OX=9606 GN=FGG PE=1 SV=3	0.00660223	-0.00660223	0.0116703	0.0255218	0.0364199	0.00731811	0.0335012	0.0404925	0.0523366	0.0259507	0.022433	0.003591	0.0546908	0.0569054	0.0674439	0.0389372	0	0.00310516	-0.00388927	0.0193656	-0.00293807	0.00101716	0.00379646	0.0350022	0.585495	5.1374	0.0001908	0.00854639	0.0729461	2.06822
E9PK67	PARP10	Isoform of Q53GL7, Poly [ADP-ribose] polymerase OS=Homo sapiens OX=9606 GN=PARP10 PE=1 SV=1	0.00515408	-0.00515408	-0.050174	-0.0132991	-0.0398647	-0.0407316	0.000473701	-0.0417137	-0.0407772	-0.0235874	-0.12142	-0.0744898	-0.0728022	-0.0537117	-0.0712525	-0.0635997	0	0.0213107	-0.00312055	0.0208168	0.0130235	-0.00163931	-0.000270492	0.0134571	0.63452	4.46439	0.000193665	0.00862053	-0.0576835	2.06447
I3L0A0	PEDS1-UBE2V1	PEDS1-UBE2V1 readthrough, HCG2044781 OS=Homo sapiens OX=9606 GN=PEDS1-UBE2V1 PE=1 SV=1	-0.00867962	0.00867962	0.0367651	0.0167466	0.0452513	0.0451877	0.0523308	0.0752912	0.0213288	0.0352074	0.0515728	0.108424	0.0732145	0.0289187	0.110689	0.061035	0	0.0552205	0.0404629	0.0746192	0.0567306	0.0123568	0.0647316	0.0451061	0.39535	4.3504	0.00019571	0.00865741	0.045205	2.06261
O60518	RANBP6	Ran-binding protein 6 OS=Homo sapiens OX=9606 GN=RANBP6 PE=1 SV=2	-0.00095915	0.00095915	0.061659	0.0567316	0.0845161	0.0287803	0.0680828	0.0987533	0.0385163	0.0654978	0.138769	0.175802	0.0667825	0.139292	0.0838161	0.275283	0	0.0566993	0.0395361	0.0927503	-0.15829	-0.00741499	-0.0607148	0.0522615	0.514139	4.42042	0.000206157	0.00902199	0.106783	2.0447
P13727	PRG2	Bone marrow proteoglycan OS=Homo sapiens OX=9606 GN=PRG2 PE=1 SV=2	0.00452032	-0.00452032	-0.110873	-0.119609	-0.0308858	-0.0197914	-0.0725847	0.0081366	-0.0980471	-0.107743	-0.0491163	-0.150152	-0.231969	-0.113444	-0.163417	-0.178236	0	0.0595258	-0.0352219	-0.0546219	-0.0244138	0.177571	-0.00060085	-0.0248136	0.602366	3.89985	0.000206485	0.00902199	-0.166231	2.0447
A0A087WY58	NEK3	Isoform of P51956, Serine/threonine-protein kinase Nek3 OS=Homo sapiens OX=9606 GN=NEK3 PE=1 SV=1	-0.030538	0.030538	0.0579103	0.144664	0.0133144	0.0931837	0.0906209	0.0585971	0.0387677	0.0351037	0.0897918	0.121216	0.148834	0.0999262	0.164983	0.196894	0	0.0357249	0.0266167	0.118134	0.0792112	-0.0383976	0.0530992	0.0210668	0.586745	3.66401	0.000213184	0.00921282	0.150814	2.03561
Q8TAV0	FAM76A	Protein FAM76A OS=Homo sapiens OX=9606 GN=FAM76A PE=2 SV=1	0.023902	-0.023902	0.0586615	0.0044054	0.0705166	0.0505042	0.168043	0.00140377	0.136715	0.0285088	0.180141	0.156591	0.156126	0.0287042	0.24196	0.197368	0	0.00871807	-0.00997487	-0.100491	-0.0221591	-0.0186985	-0.0788106	-0.072067	0.599529	3.84323	0.000213439	0.00921282	0.211452	2.03561
Q86YT6	MIB1	E3 ubiquitin-protein ligase MIB1 OS=Homo sapiens OX=9606 GN=MIB1 PE=1 SV=1	0.034663	-0.034663	-0.044459	-0.0276684	0.0320236	0.0351103	-0.0383074	0.0701577	0.165962	0.060445	0.173581	0.338511	0.203329	0.228563	0.104067	0.163998	0	0.0443131	0.0376197	-0.0197458	0.0246206	0.0321036	0.0771116	0.0347593	0.740977	4.53383	0.000216127	0.0092265	0.199327	2.03496
Q15464	SHB	SH2 domain-containing adapter protein B OS=Homo sapiens OX=9606 GN=SHB PE=1 SV=2	-0.00112809	0.00112809	0.122507	0.08411	0.0545341	0.0154721	0.133672	0.00434901	0.0330579	0.15372	0.0453506	0.169149	0.118436	0.13817	0.226334	0.278524	NA	NA	NA	NA	NA	NA	NA	NA	0.634295	3.35591	0.000216347	0.0092265	0.190575	2.03496
Q99933	BAG1	BAG family molecular chaperone regulator 1 OS=Homo sapiens OX=9606 GN=BAG1 PE=1 SV=4	0.0022475	-0.0022475	0.012111	0.00790312	0.0203517	0.00613211	-0.0105509	-0.0050453	0.0366873	0.000422947	0.0274998	0.0384602	0.0548459	0.0233706	0.0574366	0.0570787	0	0.00553581	0.00766545	-0.0187101	-0.0049897	0.0176933	-0.000576836	0.0127792	0.740478	3.88571	0.000218997	0.00923324	0.0524549	2.03465
O43148	RNMT	mRNA cap guanine-N7 methyltransferase OS=Homo sapiens OX=9606 GN=RNMT PE=1 SV=1	0.00203327	-0.00203327	0.036852	0.0191155	0.0148305	0.0211289	0.0167051	0.0247176	0.0142697	0.0023793	0.0157181	0.0313522	0.0424113	0.0391653	0.0332922	0.0555342	0	0.0249316	-0.00394448	-0.0121931	0.0240304	0.0332244	0.0227123	0.0413382	0.576494	3.90646	0.000219098	0.00923324	0.0311265	2.03465
Q9BXS5	AP1M1	AP-1 complex subunit mu-1 OS=Homo sapiens OX=9606 GN=AP1M1 PE=1 SV=3	-0.0067979	0.0067979	0.0286273	0.0392634	0.010023	0.0320479	-0.00201645	0.0381636	0.0310363	0.0277701	0.0366606	0.0279079	0.0308916	0.0463953	0.0615841	0.0375797	0	0.0691912	0.0234885	0.0686931	0.040194	0.0264717	0.0591569	0.0265393	0.572661	5.12569	0.000229595	0.00961867	0.0639461	2.01688
Q6P1X5	TAF2	Transcription initiation factor TFIID subunit 2 OS=Homo sapiens OX=9606 GN=TAF2 PE=1 SV=3	0.00672526	-0.00672526	0.0211094	0.0015175	-0.0419009	-0.0379014	-0.0428594	-0.0106009	-0.061022	-0.078102	-0.105405	-0.0859153	-0.000265028	-0.0737216	-0.0908396	-0.154045	0	0.0265229	0.0579425	0.0293082	0.0542045	0.048854	0.063815	0.0647157	0.599302	4.3	0.000231902	0.00964939	-0.102298	2.0155
F5H5N2	ISCU	Isoform of Q9H1K1, Iron-sulfur cluster assembly enzyme ISCU, mitochondrial OS=Homo sapiens OX=9606 GN=ISCU PE=1 SV=1	0.0223706	-0.0223706	-0.056318	-0.0414379	-0.0160259	-0.00468785	-0.045771	-0.00366202	-0.0229073	-0.00871616	-0.0508913	-0.0781974	-0.11811	-0.0557385	-0.125578	-0.111146	0	0.0079699	0.0308646	0.0214318	0.0259561	0.0123416	0.00119887	-0.00805785	0.718947	3.80329	0.000233038	0.00964939	-0.10232	2.0155
Q14061	COX17	Cytochrome c oxidase copper chaperone OS=Homo sapiens OX=9606 GN=COX17 PE=1 SV=2	0.0103346	-0.0103346	-0.000529694	-0.0302665	-0.0431118	-0.0465491	-0.122408	-0.0327896	-0.052291	-0.0962403	-0.0671932	-0.108879	-0.100202	-0.0418806	-0.0873254	-0.065715	0	-0.100505	-0.0377031	-0.132374	-0.0380142	-0.191042	-0.172638	-0.144686	0.687943	5.61661	0.000242104	0.00996686	-0.0780122	2.00144
A0A0J9YVP6	PUF60	Isoform of Q9UHX1, 60 kDa poly(U)-binding-splicing factor (Fragment) OS=Homo sapiens OX=9606 GN=PUF60 PE=1 SV=1	0.024971	-0.024971	-0.00679438	-0.0500936	-0.00316981	-0.000758221	-0.0110121	-0.103185	-0.100149	-0.0326892	-0.0728381	-0.118886	-0.082945	-0.101041	-0.0812384	-0.0806783	0	-0.0415858	-0.039367	-0.0385203	-0.0476899	-0.0204119	-0.0630206	-0.0371158	0.639421	5.01876	0.000255115	0.0104421	-0.0829736	1.98121
Q9UJ04	TSPYL4	Testis-specific Y-encoded-like protein 4 OS=Homo sapiens OX=9606 GN=TSPYL4 PE=1 SV=2	-0.0116746	0.0116746	0.132956	0.0493082	0.0250313	0.0894872	0.144373	0.10016	0.19083	0.140505	0.123354	0.209379	0.0491201	0.0927965	0.190606	0.173638	NA	NA	NA	NA	NA	NA	NA	NA	0.621663	6.12338	0.000258723	0.0105293	0.177033	1.9776
Q9BXP5	SRRT	Serrate RNA effector molecule homolog OS=Homo sapiens OX=9606 GN=SRRT PE=1 SV=1	-0.00938018	0.00938018	-0.00725526	-0.0136418	-0.0223038	-0.0107536	-0.0506893	-0.0196175	-0.0337156	-0.010105	-0.0244516	-0.037577	-0.019454	-0.0347693	-0.031157	-0.0447218	0	-0.0202175	-0.0350346	-0.0417111	-0.0279531	-0.0395704	-0.0327209	-0.0105316	0.602073	5.70933	0.000264238	0.0106562	-0.031055	1.9724
Q9UK53	ING1	Inhibitor of growth protein 1 OS=Homo sapiens OX=9606 GN=ING1 PE=1 SV=2	0.0381115	-0.0381115	-0.00197728	-0.00550344	-0.00785005	-0.0164391	-0.147476	-0.0528893	-0.0905168	-0.0820755	-0.0583307	-0.196476	-0.102677	-0.0803944	-0.173097	-0.106732	0	-0.0531017	0.112671	0.0315516	0.175328	0.0188523	0.0741129	0.09504	0.651021	5.25628	0.000264834	0.0106562	-0.110775	1.9724
Q99459	CDC5L	Cell division cycle 5-like protein OS=Homo sapiens OX=9606 GN=CDC5L PE=1 SV=2	-0.00735337	0.00735337	0.019537	0.0264655	0.0249662	0.0269951	0.0253812	0.0313534	0.0186363	0.0417891	0.0138152	0.017339	0.0514499	0.0336472	0.0273997	0.0443251	0	-0.00356083	0.00433347	-0.00703097	0.00601636	-0.00411634	0.00965212	-0.0224162	0.621043	6.3	0.000268836	0.010695	0.0336142	1.97082
O43182	ARHGAP6	Rho GTPase-activating protein 6 OS=Homo sapiens OX=9606 GN=ARHGAP6 PE=1 SV=3	0.0139082	-0.0139082	0.0470757	-0.0489681	0.0840062	0.00477405	0.0215302	0.0559032	0.0145682	0.025591	0.129857	0.0913774	0.122969	0.0557902	0.103559	0.173825	0	-0.0702826	-0.220393	-0.251523	-0.169603	-0.194714	-0.164588	-0.119932	0.633216	4.26311	0.000270376	0.010695	0.0977513	1.97082
E7EPM6	ACSL1	Isoform of P33121, Long-chain-fatty-acid--CoA ligase 1 OS=Homo sapiens OX=9606 GN=ACSL1 PE=1 SV=1	-0.0398868	0.0398868	0.00444298	0.00330814	-0.077878	0.00741592	0.00750117	-0.0557488	-0.0285238	0.0222432	-0.0629902	-0.0377405	-0.0898928	-0.0761314	-0.150056	-0.189338	0	-0.0644984	0.0250253	-0.0123089	-0.00494643	-0.096941	-0.0767093	-0.122577	0.732084	3.32095	0.000272348	0.010695	-0.157005	1.97082
P20290	BTF3	Transcription factor BTF3 OS=Homo sapiens OX=9606 GN=BTF3 PE=1 SV=1	0.000737954	-0.000737954	0.0295788	0.0218376	0.00573338	0.0103152	0.00431424	0.00732672	0.0330858	0.00882908	0.0630481	0.0238359	0.0398448	0.028328	0.0410697	0.0761366	0	0.0338673	0.038006	0.0216226	0.00795016	-0.00370154	0.0165906	0.0436179	0.630592	3.57729	0.000273072	0.010695	0.0515052	1.97082
Q9Y5K6	CD2AP	CD2-associated protein OS=Homo sapiens OX=9606 GN=CD2AP PE=1 SV=1	0.00710992	-0.00710992	0.00446204	0.0273976	0.0341147	0.0302745	0.0198189	0.021624	0.0202863	0.0147209	0.0209007	0.0381084	0.0392111	0.0242626	0.0637852	0.0258672	0	0.013098	-0.0014397	-0.00547501	-0.00972578	-0.00185872	0.014082	0.00637325	0.50352	6.3	0.000274169	0.010695	0.0275613	1.97082
Q9Y383	LUC7L2	Putative RNA-binding protein Luc7-like 2 OS=Homo sapiens OX=9606 GN=LUC7L2 PE=1 SV=2	-0.0316768	0.0316768	-0.024462	0.0743043	0.0186188	0.0715623	0.0267346	0.0738903	0.00211005	0.0842211	-0.0280499	-0.0715861	-0.071483	-0.0546814	-0.138034	-0.275388	0	0.0511925	0.0324032	0.00814298	0.0297695	0.0249559	0.026713	-0.00679111	0.731732	3.29296	0.000274808	0.010695	-0.224432	1.97082
P10515	DLAT	Dihydrolipoyllysine-residue acetyltransferase component of pyruvate dehydrogenase complex, mitochondrial OS=Homo sapiens OX=9606 GN=DLAT PE=1 SV=3	0.00527292	-0.00527292	-0.00281656	0.0221286	0.0281497	-0.0192105	-0.0252882	0.00676335	-0.00423762	-0.000258002	0.0200144	-0.00582287	0.0119947	0.000310795	0.0581003	0.131718	0	-0.0286925	-0.00684429	-0.0683409	-0.0474428	-0.0596091	-0.0665016	-0.0468299	0.731282	3.12249	0.000277978	0.0107045	0.0935507	1.97043
Q5TEJ8	THEMIS2	Protein THEMIS2 OS=Homo sapiens OX=9606 GN=THEMIS2 PE=1 SV=1	0.0277623	-0.0277623	-0.00752876	-0.0418777	-0.0354308	-0.0391138	-0.0690333	-0.0358241	-0.0520758	-0.0601043	-0.0466553	-0.047121	-0.0537082	-0.0548484	-0.0527228	-0.0596498	0	0.00831274	-0.0232277	0.0103678	0.00666648	-0.0248521	-0.00764394	-0.0089362	0.652626	5.92445	0.000278059	0.0107045	-0.0553041	1.97043
Q05048	CSTF1	Cleavage stimulation factor subunit 1 OS=Homo sapiens OX=9606 GN=CSTF1 PE=1 SV=1	-0.0100496	0.0100496	0.0750936	0.0753105	0.0605273	0.0985578	0.110511	0.0436964	0.0610987	0.0722923	0.052973	0.0608042	0.0561843	0.0445184	0.088238	0.060779	0	0.0349965	-0.0257606	0.020189	0.0530308	0.0078306	-0.0410844	-0.0160141	0.730898	6.3	0.000280707	0.0107483	0.0686267	1.96866
Q13217	DNAJC3	DnaJ homolog subfamily C member 3 OS=Homo sapiens OX=9606 GN=DNAJC3 PE=1 SV=1	-0.0140578	0.0140578	-0.0134223	-0.00654933	0.0435921	-0.00499122	0.035957	-0.0247494	-0.0159646	0.0234403	-0.00262267	0.00223389	0.0408653	0.0495004	0.0913227	0.0890285	0	-0.0424347	-0.0125293	-0.0189929	-0.0426292	-0.0574955	-0.00696729	-0.00664431	0.73048	3.52008	0.00028371	0.0108053	0.0875391	1.96637
P54803	GALC	Galactocerebrosidase OS=Homo sapiens OX=9606 GN=GALC PE=1 SV=3	0.0494301	-0.0494301	0.0792782	0.0213133	0.0392468	0.0639214	0.0899475	-0.00695591	0.0518225	0.0211278	0.119032	0.158568	0.132056	0.107741	0.1199	0.141435	0	-0.0725404	-0.179693	-0.0490264	0.104789	0.0223899	-0.0389405	-0.176724	0.622803	4.39914	0.000290497	0.0109467	0.10113	1.96072
Q9BTT4	MED10	Mediator of RNA polymerase II transcription subunit 10 OS=Homo sapiens OX=9606 GN=MED10 PE=1 SV=1	0.0364449	-0.0364449	0.186755	0.25794	0.2064	0.291927	0.201123	0.122693	0.143074	0.181311	0.197392	0.171603	0.160066	0.156694	0.112856	0.136489	0	-0.00173722	-0.162099	-0.223963	-0.0964092	-0.109332	-0.0201053	-0.0946958	0.729479	6.3	0.000290999	0.0109467	0.180448	1.96072
Q969Z4	RELT	Tumor necrosis factor receptor superfamily member 19L OS=Homo sapiens OX=9606 GN=RELT PE=1 SV=1	0.0453095	-0.0453095	0.0125083	0.159323	0.161404	0.148659	0.0891304	0.215909	0.174492	0.15595	0.152049	0.127036	0.106801	0.136977	0.191612	0.235109	NA	NA	NA	NA	NA	NA	NA	NA	0.66546	6.02266	0.000292945	0.0109467	0.158586	1.96072
F8VVK8	RPH3A	Isoform of Q9Y2J0, Rabphilin-3A (Fragment) OS=Homo sapiens OX=9606 GN=RPH3A PE=1 SV=1	0.0490253	-0.0490253	0.012268	-0.11502	-0.180125	0.0491836	-0.0462361	-0.152228	-0.164552	-0.101848	-0.142941	-0.123768	-0.103859	-0.148838	-0.22167	-0.260748	NA	NA	NA	NA	NA	NA	NA	NA	0.573174	4.04299	0.000295695	0.0109467	-0.246239	1.96072
Q8NDV7	TNRC6A	Trinucleotide repeat-containing gene 6A protein OS=Homo sapiens OX=9606 GN=TNRC6A PE=1 SV=2	0.0340978	-0.0340978	0.100515	0.0550507	0.142833	0.0509505	0.0586092	0.0310572	0.151527	0.139941	0.0456779	0.243976	0.13556	0.252964	0.179577	0.133839	0	-0.0350803	-0.0805576	-0.062251	-0.113291	-0.0628549	-0.0426709	-0.175452	0.57166	5.68675	0.00029717	0.0109467	0.260316	1.96072
P0DP25	CALM3	Calmodulin-3 OS=Homo sapiens OX=9606 GN=CALM3 PE=1 SV=1	0.018095	-0.018095	0.0235423	-0.0154908	-0.0137088	-0.00325461	-0.018486	0.0225479	-0.0110354	-0.042599	0.0570251	0.0776667	0.0439609	0.0486359	0.10705	0.123201	0	-0.0297953	-0.028198	-0.0419178	-0.0608467	-0.0236155	0.0218159	-0.0360335	0.72858	4.08418	0.00029768	0.0109467	0.0855981	1.96072
O00148	DDX39A	ATP-dependent RNA helicase DDX39A OS=Homo sapiens OX=9606 GN=DDX39A PE=1 SV=2	-0.00382371	0.00382371	-0.00775147	0.00606563	-0.0545207	-0.00836226	-0.0816238	-0.0609431	-0.0764089	-0.0461159	-0.0606683	-0.057417	-0.0417097	-0.0155118	-0.0556677	-0.0625193	0	-0.0473579	-0.0704055	0.0136669	0.008444	0.00369578	-0.00237052	-0.0285021	0.728506	5.53508	0.00029824	0.0109467	-0.0555794	1.96072
Q9BSF0	C2orf88	Small membrane A-kinase anchor protein OS=Homo sapiens OX=9606 GN=C2orf88 PE=1 SV=2	-0.0356725	0.0356725	0.0817747	0.0121898	0.0100668	-0.056948	0.028517	-0.0103277	0.0303147	0.0208041	0.0540937	0.0178244	0.150531	0.0689367	0.230797	0.143458	0	-0.374094	-0.576858	-0.333459	-0.400865	-0.176667	-0.313963	-0.20078	0.728162	3.47482	0.000300833	0.0109467	0.179861	1.96072
P02671	FGA	Fibrinogen alpha chain OS=Homo sapiens OX=9606 GN=FGA PE=1 SV=2	-0.0157154	0.0157154	0.0106143	0.0314671	0.0350771	0.0351131	0.0758441	0.0353442	0.0570505	0.0190146	0.0379747	0.0275799	0.0661042	0.0549953	0.0875631	0.0384044	0	0.00105675	-0.0117505	0.0424214	-0.018738	-0.00755626	0.0107359	0.0186363	0.577527	6.3	0.000301257	0.0109467	0.0847336	1.96072
Q8N108	MIER1	Mesoderm induction early response protein 1 OS=Homo sapiens OX=9606 GN=MIER1 PE=1 SV=2	0.0090136	-0.0090136	0.025702	0.0400362	0.0313096	0.0395706	0.0654246	0.017802	0.0380711	0.0229261	0.0503953	0.0377122	0.0774153	0.0481803	0.0326756	0.0521054	0	0.0297872	0.0272477	-0.0297443	-0.00568202	0.00436346	-0.0297264	-0.0496352	0.62142	6.3	0.000307551	0.0111187	0.0565238	1.95395
P11766	ADH5	Alcohol dehydrogenase class-3 OS=Homo sapiens OX=9606 GN=ADH5 PE=1 SV=4	-0.00280143	0.00280143	0.0124249	0.0140561	0.0462701	0.0109927	0.0361372	0.0147949	0.037581	0.00567268	0.038008	0.00545384	0.0670534	0.0238241	0.0876627	0.0829285	0	-0.00885728	-0.0303721	-0.0176403	-0.0340801	-0.0169974	-0.0304235	-0.0211434	0.681184	3.28416	0.000314088	0.0112977	0.0701578	1.94701
Q96FJ2	DYNLL2	Dynein light chain 2, cytoplasmic OS=Homo sapiens OX=9606 GN=DYNLL2 PE=1 SV=1	0.00746337	-0.00746337	0.0677142	0.0601703	0.0551948	0.0313848	0.0599064	0.0760674	0.0674201	0.0706298	0.0560252	0.08344	0.0230237	0.0701976	0.0451809	0.0458663	0	0.0456909	-0.00910206	0.00231603	-0.0116948	-0.0102945	-0.0255991	0.0463742	0.725804	6.3	0.000319148	0.011422	0.0580267	1.94226
O60306	AQR	RNA helicase aquarius OS=Homo sapiens OX=9606 GN=AQR PE=1 SV=4	0.00776772	-0.00776772	-0.0663893	-0.0533034	-0.073821	-0.0427094	-0.041426	-0.0298639	-0.053532	-0.012764	-0.0866857	-0.0540566	-0.0940869	-0.0610926	-0.0758593	-0.0624041	0	0.0225629	-0.00460812	-0.000137502	0.0102801	-0.0116269	-0.017693	0.0256468	0.579932	6.3	0.00032079	0.0114233	-0.0916047	1.94221
Q9NPP4	NLRC4	NLR family CARD domain-containing protein 4 OS=Homo sapiens OX=9606 GN=NLRC4 PE=1 SV=2	0.00897131	-0.00897131	-0.0704646	-0.0500033	-0.0960766	-0.0831997	-0.11962	-0.0924177	-0.0134126	-0.093229	-0.0621389	-0.102681	-0.0854732	-0.0814081	-0.0836142	-0.0837199	0	0.0507247	0.0373446	0.13208	0.0700954	0.0307331	0.0905311	0.0361419	0.723647	6.04847	0.00033672	0.011931	-0.0830829	1.92332
Q15833	STXBP2	Syntaxin-binding protein 2 OS=Homo sapiens OX=9606 GN=STXBP2 PE=1 SV=2	0.0123442	-0.0123442	-0.0466449	-0.0207248	-0.0185989	-0.0222182	-0.0656472	-0.0481715	-0.0387155	-0.0577989	-0.0401504	-0.078001	-0.0322986	-0.0453129	-0.0503558	-0.0509037	0	-0.0342391	-0.00503599	-0.0168303	-0.00244714	-0.0282535	-0.0036686	-0.041829	0.663377	6.15596	0.000339638	0.0119355	-0.0570723	1.92316
A0A0U1RRE5	NBDY	Negative regulator of P-body association OS=Homo sapiens OX=9606 GN=NBDY PE=1 SV=1	0.0353393	-0.0353393	0.0748425	0.0460375	0.0452823	0.0112337	0.0693368	0.0302866	0.134213	0.0606107	0.0884139	0.160132	0.0842347	0.0430118	0.13914	0.119702	0	-0.0273297	-0.0276347	-0.142999	-0.0660257	-0.0472728	-0.114914	-0.0608557	0.562242	5.54302	0.000340415	0.0119355	0.170139	1.92316
Q8WZA9	IRGQ	Immunity-related GTPase family Q protein OS=Homo sapiens OX=9606 GN=IRGQ PE=1 SV=1	-0.0177475	0.0177475	-0.0184522	-0.0285015	-0.0153669	-0.0282481	-0.0928275	-0.0288787	-0.0202905	-0.0745855	-0.0412803	-0.0582455	-0.127535	-0.0386845	-0.088333	-0.0673085	0	0.0273499	0.00237055	0.0337831	0.0557982	-0.0285957	0.00960232	0.0106863	0.562177	5.09466	0.000342512	0.0119355	-0.114315	1.92316
P06865	HEXA	Beta-hexosaminidase subunit alpha OS=Homo sapiens OX=9606 GN=HEXA PE=1 SV=2	-0.00842291	0.00842291	0.0901894	0.0125239	0.0524492	0.028889	0.0760012	0.0389687	0.0295249	0.0095605	0.03964	0.0767426	0.0634665	0.0751627	0.104906	0.0948138	0	0.051526	0.088776	0.105041	0.0706695	0.0644191	0.0853277	0.0447971	0.551838	4.77559	0.000343553	0.0119355	0.118467	1.92316
A0A1W2PQV2	GCSH	Isoform of P23434, Glycine cleavage system H protein, mitochondrial (Fragment) OS=Homo sapiens OX=9606 GN=GCSH PE=1 SV=1	-0.0235235	0.0235235	0.032072	0.048074	0.0719322	0.0191419	0.0787606	0.0700605	-0.0186051	0.080491	0.0724126	0.116326	0.0675497	0.099835	0.0749283	0.134383	0	0.150944	0.0643783	0.229622	0.161131	0.139388	0.218067	0.193978	0.430992	4.24065	0.000356123	0.0123122	0.0626131	1.90966
Q9Y4G6	TLN2	Talin-2 OS=Homo sapiens OX=9606 GN=TLN2 PE=1 SV=4	-0.0187322	0.0187322	0.0832349	0.0465512	0.0659003	0.130579	0.188975	0.106299	0.0233596	0.0214903	0.0617602	0.264533	0.115972	0.15883	0.255556	0.256318	0	-0.0201305	-0.0318805	-0.0970208	-0.0180941	-0.0316937	0.0531929	0.00858792	0.468217	4.05826	0.00035809	0.0123204	0.141147	1.90938
A6NHR9	SMCHD1	Structural maintenance of chromosomes flexible hinge domain-containing protein 1 OS=Homo sapiens OX=9606 GN=SMCHD1 PE=1 SV=2	0.00710352	-0.00710352	-0.0104124	-0.018515	-0.0371407	-0.0239263	-0.0495884	-0.0204568	-0.0241919	-0.0478186	-0.0476936	-0.0942901	-0.0208778	-0.0403715	-0.0387945	-0.0874757	0	-0.00706918	-0.0269076	-0.0267097	-0.00958493	-0.0347489	-0.0198243	0.014288	0.569007	5.56326	0.000362705	0.0124192	-0.0609197	1.90591
Q14139	UBE4A	Ubiquitin conjugation factor E4 A OS=Homo sapiens OX=9606 GN=UBE4A PE=1 SV=2	0.00472886	-0.00472886	-0.0335232	-0.0897172	-0.0841176	-0.102189	-0.118199	-0.104481	-0.0384449	-0.0506154	-0.0777128	-0.121303	-0.121848	-0.0601251	-0.103351	-0.107541	0	-0.0622637	-0.0375542	-0.0333642	-0.0782659	-0.103458	-0.0782303	-0.0625806	0.701146	6.03733	0.000367273	0.0125154	-0.0908277	1.90256
Q96PP9	GBP4	Guanylate-binding protein 4 OS=Homo sapiens OX=9606 GN=GBP4 PE=1 SV=2	0.00908495	-0.00908495	-0.00842649	-0.0423646	-0.0733785	-0.0512664	-0.0409886	-0.0790075	-0.0244181	-0.0620441	-0.0464855	-0.055472	-0.0599732	-0.0364812	-0.0550125	-0.0680934	0	0.0341971	0.00834173	0.0469231	0.0360942	0.00573972	0.0150322	0.005629	0.719538	5.99339	0.000372483	0.0126325	-0.0543859	1.89851
Q14432	PDE3A	cGMP-inhibited 3',5'-cyclic phosphodiesterase A OS=Homo sapiens OX=9606 GN=PDE3A PE=1 SV=3	-0.1072	0.1072	-0.286834	-0.258701	-0.249818	-0.211162	-0.258332	-0.208348	-0.221125	-0.172341	-0.169515	-0.243749	-0.322121	-0.224809	-0.237051	-0.281644	0	0.0322591	0.0247185	0.350686	0.0765466	-0.0523954	0.504816	0.10278	0.718787	6.3	0.000379351	0.0128044	-0.238998	1.89264
P01137	TGFB1	Transforming growth factor beta-1 proprotein OS=Homo sapiens OX=9606 GN=TGFB1 PE=1 SV=2	-0.0131967	0.0131967	0.0368017	0.0115648	0.0300194	0.0402648	0.0668401	0.0197341	0.0653761	0.0395419	0.0615603	0.0200812	0.0598922	0.0467646	0.0426633	0.0507869	0	-0.0358227	-0.015155	0.015263	-0.0356066	-0.0379901	0.0253575	-0.00267747	0.639525	6.02238	0.000382999	0.0128666	0.0511823	1.89054
O60888	CUTA	Protein CutA OS=Homo sapiens OX=9606 GN=CUTA PE=1 SV=2	-0.00666453	0.00666453	0.0302077	0.0648289	0.0127081	0.0640967	0.0638974	0.0700732	0.0638808	0.0303579	0.0869117	0.0631843	0.076898	0.0291774	0.0577651	0.0777645	0	0.121334	0.0984128	0.1104	0.100774	0.0609672	0.0549762	0.098018	0.641735	6.3	0.000387138	0.0129293	0.0715012	1.88842
Q6UY01	LRRC31	Leucine-rich repeat-containing protein 31 OS=Homo sapiens OX=9606 GN=LRRC31 PE=2 SV=1	0.0114462	-0.0114462	-0.042141	-0.0437927	-0.0202823	-0.105184	-0.118621	-0.094364	-0.0970323	-0.121602	-0.0440077	-0.0931482	-0.0814597	-0.175423	-0.0644517	-0.117027	NA	NA	NA	NA	NA	NA	NA	NA	0.647583	5.83992	0.000388497	0.0129293	-0.102165	1.88842
Q9BSL1	UBAC1	Ubiquitin-associated domain-containing protein 1 OS=Homo sapiens OX=9606 GN=UBAC1 PE=1 SV=1	-0.00927493	0.00927493	0.00610792	-0.0156379	-0.0221461	-0.0222316	0.0302439	0.00870686	-0.0174771	-0.00954356	-0.017362	-0.0386343	-0.0438008	-0.0740803	-0.0461007	-0.0819976	0	0.0445783	0.0408994	0.0619337	0.0388185	0.0308391	0.0442757	0.116284	0.717001	3.93767	0.000396135	0.0131222	-0.0623237	1.88199
Q9Y376	CAB39	Calcium-binding protein 39 OS=Homo sapiens OX=9606 GN=CAB39 PE=1 SV=1	-0.0104115	0.0104115	0.0179659	-0.000317758	0.0380665	0.0412344	0.0523195	0.02223	0.019253	0.0164844	0.0274111	0.0222655	0.0362671	0.0309436	0.0801948	0.0553278	0	0.027655	0.0415212	0.0338532	0.0348694	0.00286258	0.0107303	0.0130955	0.546507	4.3629	0.000401146	0.013123	0.0731156	1.88197
Q9BZL1	UBL5	Ubiquitin-like protein 5 OS=Homo sapiens OX=9606 GN=UBL5 PE=1 SV=1	0.00134114	-0.00134114	-0.0901028	-0.051158	-0.0771746	-0.0619868	-0.134961	-0.0707713	-0.0735707	-0.0762931	-0.0570716	-0.0507672	-0.0723396	-0.0995519	-0.047543	-0.0799627	0	0.0246593	0.0454877	0.0760437	0.0229416	-0.0689925	0.0586728	-0.0233208	0.716447	6.3	0.000401457	0.013123	-0.0752172	1.88197
O94776	MTA2	Metastasis-associated protein MTA2 OS=Homo sapiens OX=9606 GN=MTA2 PE=1 SV=1	0.0121877	-0.0121877	-0.0297846	0.015197	-0.0191167	0.000282518	-0.0487859	-0.0351621	-0.027079	-0.0326015	-0.0376199	-0.0274953	-0.017212	-0.0300487	-0.0536297	-0.0667484	0	-0.0616608	-0.0172833	0.0255244	-0.00317189	0.0335131	-0.0101465	-0.0231823	0.553771	4.35827	0.000401686	0.013123	-0.0682957	1.88197
P18433	PTPRA	Receptor-type tyrosine-protein phosphatase alpha OS=Homo sapiens OX=9606 GN=PTPRA PE=1 SV=3	-0.00440706	0.00440706	-0.0122333	0.0126287	0.00680823	-0.0218958	-0.0152113	-0.0255414	-0.0061863	0.00555091	-0.0512655	0.0130897	-0.0329947	-0.0510105	-0.0626348	-0.122931	0	0.0372546	0.0280459	0.0352527	0.0587276	0.0508771	0.0197303	0.0435629	0.715598	3.28623	0.000409753	0.0133254	-0.0873701	1.87532
Q8IWB1	ITPRIP	Inositol 1,4,5-trisphosphate receptor-interacting protein OS=Homo sapiens OX=9606 GN=ITPRIP PE=1 SV=1	-0.0354873	0.0354873	-0.208478	-0.0948011	-0.0808065	-0.115519	-0.132805	-0.196894	-0.0809957	-0.0248455	-0.295292	-0.0877576	-0.175197	-0.175022	-0.252833	-0.276936	0	0.0415034	-0.0953757	-0.187146	-0.302439	-0.0367754	-0.258309	-0.0121252	0.421553	4.06912	0.00041271	0.0133264	-0.142079	1.87529
Q9BYD6	MRPL1	39S ribosomal protein L1, mitochondrial OS=Homo sapiens OX=9606 GN=MRPL1 PE=1 SV=2	0.0173719	-0.0173719	-0.143657	-0.0626487	0.0288354	-0.113311	-0.0730811	-0.130893	-0.0979355	-0.0853039	-0.183416	-0.177235	-0.134011	-0.20587	-0.0802277	-0.152728	0	-0.0142395	-0.00754599	0.0196212	-0.0161149	0.0144098	0.0611185	-0.0160892	0.574792	6.3	0.000415308	0.0133264	-0.222415	1.87529
P53597	SUCLG1	Succinate--CoA ligase [ADP/GDP-forming] subunit alpha, mitochondrial OS=Homo sapiens OX=9606 GN=SUCLG1 PE=1 SV=4	0.0336771	-0.0336771	-0.0356191	-0.0394726	-0.0272032	-0.0547716	-0.0299088	-0.0558812	-0.0623956	-0.0795036	-0.0689636	-0.076331	-0.115324	-0.0935866	-0.11416	-0.0190617	0	-0.0259075	0.018767	0.0243518	-0.0177024	-0.0108451	-0.0283965	-0.0582762	0.569998	5.73745	0.000415397	0.0133264	-0.100604	1.87529
D6RB01	FAM169A	Isoform of Q9Y6X4, Soluble lamin-associated protein of 75 kDa OS=Homo sapiens OX=9606 GN=FAM169A PE=1 SV=1	0.00492521	-0.00492521	0.0318069	0.0291242	0.0308305	0.0481467	0.0539784	0.0437996	0.0740326	0.0550255	0.0369221	0.0540432	0.0288351	0.0381613	0.0227455	0.0376927	0	0.0398846	0.001342	-0.0891392	0.00238458	0.0106929	-0.0225231	0.0422984	0.714822	6.18062	0.000417448	0.0133321	0.0445566	1.8751
Q562R1	ACTBL2	Beta-actin-like protein 2 OS=Homo sapiens OX=9606 GN=ACTBL2 PE=1 SV=2	0.0173611	-0.0173611	-0.0459764	-0.0572853	-0.0234198	-0.0226132	-0.047617	-0.0484693	-0.0469995	-0.0881052	-0.0283802	-0.0784361	-0.0675025	-0.0631562	-0.0676077	-0.044496	0	-0.00528654	-0.010108	-0.0264684	-0.0157771	-0.0411721	-0.0298964	-0.0285432	0.614949	6.3	0.000423427	0.0134284	-0.0746534	1.87198
Q9UM22	EPDR1	Mammalian ependymin-related protein 1 OS=Homo sapiens OX=9606 GN=EPDR1 PE=1 SV=2	0.0222158	-0.0222158	0.079655	0.0996585	0.0508282	0.0205249	0.0417635	0.0363042	0.111922	0.0351063	0.124137	0.141129	0.144579	0.0808024	0.0587782	0.166837	NA	NA	NA	NA	NA	NA	NA	NA	0.52985	4.51684	0.000424233	0.0134284	0.0865055	1.87198
E7EPT4	NDUFV2	Isoform of P19404, NADH dehydrogenase [ubiquinone] flavoprotein 2, mitochondrial OS=Homo sapiens OX=9606 GN=NDUFV2 PE=1 SV=1	0.00720725	-0.00720725	-0.00502991	-0.0065729	-0.00176969	-0.00675341	-0.0120929	0.0109438	0.00755318	-0.026815	0.00754981	-0.0288259	0.00430753	0.0119043	0.0457228	0.0523549	NA	NA	NA	NA	NA	NA	NA	NA	0.713415	3.46364	0.000431723	0.013605	0.0534542	1.8663
A0A0C4DGA2	ECI2	Isoform of O75521, Enoyl-CoA delta isomerase 2, mitochondrial OS=Homo sapiens OX=9606 GN=ECI2 PE=1 SV=1	0.0706937	-0.0706937	0.0664801	-0.00110076	0.0714547	0.0992341	0.16098	0.123135	0.0113165	0.0618891	0.0605446	0.223948	0.219129	0.123713	0.205976	0.201052	0	0.0067536	0.0260198	0.0910086	0.00567891	0.0054959	0.0325224	0.00540426	0.550731	4.28112	0.000435635	0.0136437	0.231086	1.86507
P52758	RIDA	2-iminobutanoate/2-iminopropanoate deaminase OS=Homo sapiens OX=9606 GN=RIDA PE=1 SV=1	-0.0662314	0.0662314	0.0689135	0.0808976	0.124638	0.094247	0.0996297	0.0602759	0.0793581	0.123363	0.152513	0.121025	0.129846	0.130429	0.115138	0.114306	0	-0.0817649	0.0365716	0.0258605	-0.119867	0.0187216	-0.0118661	0.0995039	0.617291	6.3	0.000436783	0.0136437	0.142753	1.86507
Q9BY49	PECR	Peroxisomal trans-2-enoyl-CoA reductase OS=Homo sapiens OX=9606 GN=PECR PE=1 SV=2	-0.0153959	0.0153959	0.0148993	0.00678194	-0.0472771	-0.0320474	-0.0296762	-0.0266778	-0.0521876	-0.00676533	-0.0277481	-0.112921	-0.0513678	-0.0967131	-0.0515608	-0.149431	0	-0.0048574	0.0291789	-0.0439871	-0.0136651	0.0276074	-0.0760916	-0.0563652	0.59891	3.76344	0.000441186	0.0137211	-0.103601	1.86261
P60604	UBE2G2	Ubiquitin-conjugating enzyme E2 G2 OS=Homo sapiens OX=9606 GN=UBE2G2 PE=1 SV=1	0.0126461	-0.0126461	-0.0887685	-0.0191589	-0.114721	-0.0575416	-0.0783385	-0.0496011	-0.0934865	-0.147913	-0.0132773	-0.12252	-0.16107	-0.0653402	-0.101424	-0.180968	0	0.0077009	-0.00202958	-0.0726067	-0.0312205	-0.0727087	-0.130008	0.0380776	0.550128	6.3	0.000447075	0.0138251	-0.181307	1.85933
Q5JSL3	DOCK11	Dedicator of cytokinesis protein 11 OS=Homo sapiens OX=9606 GN=DOCK11 PE=1 SV=2	-0.0102423	0.0102423	-0.00394619	-0.000296578	0.00124446	-0.00323139	0.0146339	-0.0454315	-0.0257432	-0.0397465	-0.0184723	-0.053873	-0.0288941	-0.0378441	-0.0389993	-0.054568	0	0.0071287	-0.0108891	-0.00173633	0.00222603	-0.0338662	-0.0432455	-0.0130871	0.619161	4.88402	0.000448415	0.0138251	-0.0391715	1.85933
Q9BVL4	SELENOO	Protein adenylyltransferase SelO, mitochondrial OS=Homo sapiens OX=9606 GN=SELENOO PE=1 SV=3	-0.0265362	0.0265362	-0.0273088	0.0441802	0.00881903	-0.0387877	0.0660349	-0.0109183	0.045562	-0.086741	-0.0497656	0.0633643	0.0660882	-0.0294183	0.224127	0.204804	0	0.0806895	0.101132	0.141531	0.0479564	0.0415356	0.0336954	0.00112283	0.711533	3.13599	0.000451464	0.0138592	0.21353	1.85826
Q13131	PRKAA1	5'-AMP-activated protein kinase catalytic subunit alpha-1 OS=Homo sapiens OX=9606 GN=PRKAA1 PE=1 SV=4	-0.0102392	0.0102392	-0.0257637	-0.00504498	-0.0393979	-0.0906885	-0.0541459	-0.0425046	-0.0782725	-0.0599319	-0.03732	-0.073572	-0.0570907	-0.0597551	-0.0265904	-0.0737647	0	0.067977	0.0351271	0.0438518	0.0627897	0.0103044	-0.0101583	0.0408301	0.711133	5.94947	0.000455766	0.0138927	-0.0577562	1.85721
A0A0B4J2A0	readthrough,	readthrough, FGGY_N domain-containing protein OS=Homo sapiens OX=9606 PE=1 SV=1	0.0163654	-0.0163654	0.0936136	0.008119	0.0495757	0.111349	0.197665	0.115529	0.0758586	0.087651	0.0610286	0.200941	0.0824511	0.0841303	0.224017	0.165746	0	0.001758	-6.8689e-05	0.0443862	0.105895	0.0411117	-0.0238075	0.0224721	0.549093	6.3	0.000456459	0.0138927	0.221035	1.85721
Q6IA17	SIGIRR	Single Ig IL-1-related receptor OS=Homo sapiens OX=9606 GN=SIGIRR PE=1 SV=3	0.0288093	-0.0288093	-0.168075	-0.0471146	-0.101242	-0.139709	-0.132159	-0.0849763	-0.00802564	-0.0801875	-0.208273	-0.0981693	-0.207905	-0.119793	-0.196562	-0.163316	NA	NA	NA	NA	NA	NA	NA	NA	0.424972	4.07842	0.000468244	0.0139886	-0.108446	1.85423
Q8NAF0	ZNF579	Zinc finger protein 579 OS=Homo sapiens OX=9606 GN=ZNF579 PE=1 SV=2	-0.0452581	0.0452581	-0.0409801	0.110119	0.0145395	0.0682088	0.100905	0.00204694	0.214615	0.127779	0.144266	0.126792	0.320563	0.16851	0.100889	0.191024	0	-0.017566	-0.0215159	-0.09302	-0.0609487	-0.0097217	0.00691054	-0.0744439	0.614458	4.85829	0.000470933	0.0139886	0.157199	1.85423
Q6ZUT1	NKAPD1	Uncharacterized protein NKAPD1 OS=Homo sapiens OX=9606 GN=NKAPD1 PE=1 SV=2	0.0136373	-0.0136373	0.180125	0.150053	0.138258	0.111071	0.130227	0.248702	0.0911872	0.134017	0.170462	0.17074	0.105312	0.0985901	0.0893426	0.160919	NA	NA	NA	NA	NA	NA	NA	NA	0.709602	6.3	0.000472517	0.0139886	0.141369	1.85423
A0A4W8VX11	PCM1	Isoform of Q15154, Pericentriolar material 1 protein OS=Homo sapiens OX=9606 GN=PCM1 PE=4 SV=1	0.0293512	-0.0293512	0.0248001	0.18322	0.0618692	0.0906837	0.0140509	0.0161264	0.122274	0.134254	0.172706	0.12949	0.115043	0.122595	0.148914	0.161833	0	-0.335818	-0.330726	-0.328783	-0.327094	-0.199738	-0.381576	-0.333127	0.539869	4.61678	0.000473341	0.0139886	0.102718	1.85423
Q15363	TMED2	Transmembrane emp24 domain-containing protein 2 OS=Homo sapiens OX=9606 GN=TMED2 PE=1 SV=1	-0.0112048	0.0112048	-0.152515	-0.0429718	-0.0306295	-0.0130555	-0.0319407	-0.0764411	-0.0984587	0.0539243	-0.114326	-0.104763	-0.174015	-0.161465	-0.176272	-0.240729	0	-0.0173685	0.241132	-0.208172	-0.196018	-0.109185	0.0222283	0.161929	0.674588	3.88851	0.000473771	0.0139886	-0.172718	1.85423
P10914	IRF1	Interferon regulatory factor 1 OS=Homo sapiens OX=9606 GN=IRF1 PE=1 SV=2	-0.0464126	0.0464126	0.0179596	0.15084	0.0681626	0.083593	0.0617339	0.101727	0.0591334	0.183584	0.0857526	0.112241	0.104763	0.175504	0.111852	0.195669	0	0.0263092	-0.0250637	0.0198387	0.0549553	0.13234	0.0280857	0.0619897	0.547215	6.27207	0.000473788	0.0139886	0.211233	1.85423
Q8IXM3	MRPL41	39S ribosomal protein L41, mitochondrial OS=Homo sapiens OX=9606 GN=MRPL41 PE=1 SV=1	0.0365647	-0.0365647	-0.0925477	-0.110816	-0.0412522	-0.0946971	-0.135104	-0.11957	-0.0602825	-0.083189	-0.114421	-0.141888	-0.161249	-0.157084	-0.0683953	-0.123374	0	-0.10237	0.0155909	-0.0533082	-0.0764677	-0.0440733	-0.186858	-0.132587	0.629699	6.3	0.000476112	0.0139886	-0.134803	1.85423
Q5T1M5	FKBP15	FK506-binding protein 15 OS=Homo sapiens OX=9606 GN=FKBP15 PE=1 SV=2	0.00306858	-0.00306858	-0.000897808	-0.00774172	-0.0337435	-0.0355791	-0.045003	-0.0505301	-0.0377049	-0.0453709	-0.0116055	-0.0305849	-0.0235149	-0.054227	-0.0220046	-0.026641	0	-0.011547	-0.00277544	0.00497538	0.00678837	-0.0154628	0.00405475	-0.0165975	0.709242	5.88934	0.000476537	0.0139886	-0.0347181	1.85423
Q86XL3	ANKLE2	Ankyrin repeat and LEM domain-containing protein 2 OS=Homo sapiens OX=9606 GN=ANKLE2 PE=1 SV=4	0.0180603	-0.0180603	-0.0238231	0.0915128	-0.0252764	0.169761	0.0417725	0.0823679	0.112288	0.0244529	0.0501147	0.151923	0.2523	0.176355	0.258395	0.122999	0	-0.0435011	-0.0152071	-0.0193252	0.0185591	-0.0183359	-0.00799016	-0.019263	0.581976	3.8432	0.000479115	0.0139886	0.200586	1.85423
Q9HCN4	GPN1	GPN-loop GTPase 1 OS=Homo sapiens OX=9606 GN=GPN1 PE=1 SV=1	0.0131908	-0.0131908	0.06977	0.0315948	0.0152224	0.0300618	0.0149368	0.0226845	0.0779137	0.0532279	0.0506882	0.0707552	0.0328348	0.0680472	0.0467973	0.0999667	0	-0.0328726	0.00436507	-0.048795	-0.0365003	-0.0504073	-0.0638405	0.00514453	0.541758	5.87881	0.000480333	0.0139886	0.0987911	1.85423
A0A087WVC6	PTPRJ	Isoform of Q12913, Protein-tyrosine-phosphatase OS=Homo sapiens OX=9606 GN=PTPRJ PE=1 SV=1	-0.0187655	0.0187655	0.0301154	-0.00952559	0.0160703	0.0278297	0.048512	0.0113346	0.0375274	0.0484907	0.0530557	0.0746834	0.0212044	0.0397924	0.0822963	0.0397224	0	0.0606645	0.0697008	0.0763188	0.07132	0.073503	0.0571762	0.0433566	0.564635	5.29897	0.000481213	0.0139886	0.0530575	1.85423
Q5T1C6	THEM4	Acyl-coenzyme A thioesterase THEM4 OS=Homo sapiens OX=9606 GN=THEM4 PE=1 SV=1	-0.00449007	0.00449007	-0.0188249	-0.0710287	-0.0575486	-0.0311904	-0.0274499	-0.0107687	-0.07027	-0.113624	-0.0778747	-0.0837044	-0.0786145	-0.0820575	-0.0567572	-0.0515924	0	-0.0125751	-0.0216018	0.00955631	0.0214166	0.0260535	-0.015349	-0.0641493	0.614071	4.79988	0.000485839	0.0140242	-0.0553291	1.85312
O43164	PJA2	E3 ubiquitin-protein ligase Praja-2 OS=Homo sapiens OX=9606 GN=PJA2 PE=1 SV=4	0.00462919	-0.00462919	0.0302689	0.0906034	0.0144372	0.0011405	0.0376073	0.0176815	0.0207441	0.0280669	0.116494	0.0535456	0.0995677	0.126159	0.0906879	0.0688241	0	0.0671132	0.0196207	-0.0116917	-0.00335708	0.00660568	0.00898804	-0.023945	0.655059	4.21201	0.000486512	0.0140242	0.0769236	1.85312
A0A1W2PR28	IQSEC2	Isoform of Q5JU85, IQ motif and SEC7 domain-containing protein 2 OS=Homo sapiens OX=9606 GN=IQSEC2 PE=1 SV=1	0.0336562	-0.0336562	-0.0276555	-0.116166	-0.0910419	-0.0759969	-0.0321304	-0.138628	0.0066182	-0.264199	-0.0811597	-0.175007	-0.161656	-0.309899	-0.246801	-0.158313	0	-0.18922	-0.199303	-0.305195	-0.144695	-0.172777	-0.213009	-0.169655	0.544697	4.5075	0.000488345	0.0140242	-0.253045	1.85312
P55084	HADHB	Trifunctional enzyme subunit beta, mitochondrial OS=Homo sapiens OX=9606 GN=HADHB PE=1 SV=3	-0.00866239	0.00866239	-0.0471088	-0.0442026	-0.00963458	-0.113952	-0.00878211	-0.0745463	-0.103501	-0.0620843	-0.107821	-0.0933113	-0.107998	-0.104216	-0.0467145	-0.0854519	0	0.0135115	0.0364394	0.039138	-0.0289283	-0.0134274	0.0147661	-0.030461	0.591905	6.24308	0.000494018	0.0141301	-0.11778	1.84985
A0A494C0X7	ITGB2	Isoform of P05107, Integrin beta OS=Homo sapiens OX=9606 GN=ITGB2 PE=1 SV=1	-0.016561	0.016561	-0.0856702	-0.0884367	-0.0253587	-0.0173467	0.0145262	-0.00274483	-0.08368	-0.019674	-0.0843394	-0.129266	-0.125144	-0.0782131	-0.121373	-0.158858	0	-0.0458427	0.0780682	-0.0599577	-0.00828937	-0.0223753	-0.00482253	0.011736	0.634321	4.48649	0.000511304	0.014566	-0.0956981	1.83666
O75608	LYPLA1	Acyl-protein thioesterase 1 OS=Homo sapiens OX=9606 GN=LYPLA1 PE=1 SV=1	0.0329947	-0.0329947	-0.00979142	-0.0265192	-0.0251938	-0.00306849	-0.0562072	-0.0243903	-0.0104975	-0.0219756	0.0522894	0.0211217	0.00757763	0.0314977	0.144586	0.100899	0	0.0177196	-0.0417809	-0.0508708	-0.0189996	-0.0729588	-0.00788396	-0.0178605	0.705978	3.2313	0.000514267	0.0145921	0.126537	1.83588
P00390	GSR	Glutathione reductase, mitochondrial OS=Homo sapiens OX=9606 GN=GSR PE=1 SV=2	0.0204441	-0.0204441	0.057114	0.014591	0.0670366	0.0494082	0.0951194	0.0486935	0.0779463	0.0300712	0.0886221	0.0835537	0.0748195	0.0634036	0.0710159	0.0483036	0	0.0442014	0.0372141	0.078007	0.0300398	0.0173736	0.0320687	0.0130746	0.678426	6.02872	0.000516483	0.0145968	0.0689911	1.83574
Q9Y3B2	EXOSC1	Exosome complex component CSL4 OS=Homo sapiens OX=9606 GN=EXOSC1 PE=1 SV=1	-0.00810759	0.00810759	-0.0162541	0.0351467	-0.0289753	0.0184521	-0.0252289	0.0199991	0.0405359	-0.0393554	0.00803342	-0.037511	-0.0326048	-0.0403602	-0.133587	-0.0899979	0	0.0274052	-0.0236584	0.0536151	0.0207506	0.0146459	0.0297034	0.0563485	0.705105	3.24013	0.00052478	0.0147727	-0.110339	1.83054
P35269	GTF2F1	General transcription factor IIF subunit 1 OS=Homo sapiens OX=9606 GN=GTF2F1 PE=1 SV=2	-0.00156219	0.00156219	0.0380384	0.0128989	0.014526	0.024856	0.00681314	0.0227707	0.0295951	0.0366816	0.0182787	0.00662677	0.0306239	0.0283689	0.0379026	0.0431291	0	-0.0262364	0.0144017	-0.0602964	-0.0217292	-0.00988999	-0.0501361	-0.0373995	0.513209	6.3	0.000531403	0.0149002	0.0255516	1.82681
Q9GZP8	IMUP	Immortalization up-regulated protein OS=Homo sapiens OX=9606 GN=IMUP PE=1 SV=1	-0.0415636	0.0415636	0.00490122	0.00330554	-0.131282	-0.100747	-0.0993116	-0.0395308	-0.109575	-0.161331	-0.0866509	-0.310912	-0.251595	-0.0565144	-0.145779	-0.229776	NA	NA	NA	NA	NA	NA	NA	NA	0.561394	5.17486	0.000533541	0.0149015	-0.192208	1.82677
P50225	SULT1A1	Sulfotransferase 1A1 OS=Homo sapiens OX=9606 GN=SULT1A1 PE=1 SV=3	0.00193132	-0.00193132	0.0203622	0.0699553	0.0204659	0.0312566	-0.0266536	-0.0708562	-0.0125999	-0.0234321	0.0109568	0.00460299	0.0353864	0.0218269	0.121677	0.155817	0	0.0483399	0.0802432	0.131635	0.106036	0.0491116	0.110422	0.0697456	0.704076	3.18387	0.000537416	0.0149511	0.13745	1.82533
Q9BV73	CEP250	Centrosome-associated protein CEP250 OS=Homo sapiens OX=9606 GN=CEP250 PE=1 SV=2	-0.0018721	0.0018721	0.00905036	0.0838519	0.0372037	0.0124748	0.0639672	0.0351365	0.0604971	0.0630412	0.045418	0.129019	0.0497073	0.0930473	0.0465034	0.094772	0	-0.0693369	-0.0253815	-0.00426678	-0.0170192	-0.0101938	-0.0176146	-0.0274846	0.557304	6.0627	0.000545323	0.015112	0.102953	1.82068
Q6UUV7	CRTC3	CREB-regulated transcription coactivator 3 OS=Homo sapiens OX=9606 GN=CRTC3 PE=1 SV=2	0.00845429	-0.00845429	-0.0295023	-0.0299213	-0.0115159	0.00706037	-0.041547	-0.0292731	-0.0181637	-0.0256929	-0.0218143	-0.0481575	-0.0610957	-0.0343872	-0.102244	-0.0324623	0	0.00409252	-0.0319054	-0.0730547	-0.0267327	-0.00675281	0.0291819	-0.014552	0.555642	3.65128	0.000553815	0.0152415	-0.0599387	1.81697
Q93052	LPP	Lipoma-preferred partner OS=Homo sapiens OX=9606 GN=LPP PE=1 SV=1	-0.00819122	0.00819122	0.0526903	0.0458308	0.0397065	0.0469129	0.0828296	0.0367429	0.0413527	0.0194786	0.0274388	0.0998781	0.0604988	0.0644824	0.0528634	0.0896821	0	0.0396271	0.0174261	0.138171	0.0550721	-0.0113209	0.0281795	0.0433016	0.563215	6.3	0.000554277	0.0152415	0.0699322	1.81697
H7BYY1	TPM1	Isoform of P09493, Tropomyosin 1 (Alpha), isoform CRA_m OS=Homo sapiens OX=9606 GN=TPM1 PE=1 SV=1	0.0207028	-0.0207028	0.0597687	0.0095269	0.0427746	-0.00110952	0.0727559	0.0552316	0.0385731	0.0262642	0.0515368	0.0311227	0.0613668	0.0564466	0.0600768	0.0768389	0	-0.00818188	-0.0476257	-0.00893797	-0.0317609	-0.0247155	0.0813664	0.0927484	0.536073	6.26473	0.000558628	0.0153021	0.0904215	1.81525
P52655	GTF2A1	Transcription initiation factor IIA subunit 1 OS=Homo sapiens OX=9606 GN=GTF2A1 PE=1 SV=1	-0.00982442	0.00982442	0.0125601	-0.0208072	0.00116159	0.025636	0.0650738	-0.0254853	0.0507693	-0.00665787	0.0766625	0.0451364	0.0770534	0.0395254	0.0819944	0.143134	0	0.174497	0.291945	0.470781	-0.0798938	-0.148994	0.195591	0.129967	0.666225	3.46342	0.000570591	0.0155121	0.104194	1.80933
P61289	PSME3	Proteasome activator complex subunit 3 OS=Homo sapiens OX=9606 GN=PSME3 PE=1 SV=1	0.00570648	-0.00570648	0.0343465	0.00872771	0.00763244	0.0494206	0.0381283	-0.0031264	0.041349	0.0480662	0.0525601	0.0456437	0.0189216	0.0364648	0.0624656	0.04079	0	0.0893429	0.0843449	0.11366	0.0759639	0.0584088	0.0637647	0.0182534	0.462859	4.9179	0.000573241	0.0155121	0.0307702	1.80933
Q6DD88	ATL3	Atlastin-3 OS=Homo sapiens OX=9606 GN=ATL3 PE=1 SV=1	-0.00622057	0.00622057	-0.0940652	0.00477445	-0.0729719	-0.0357035	-0.0895128	-0.11349	-0.0801983	-0.0427297	-0.111531	-0.0714301	-0.114282	-0.0467252	-0.0904247	-0.0813202	0	-0.0696718	-0.0135906	-0.0206087	-0.0927804	-0.0035286	-0.0681696	-0.0863507	0.622153	6.00758	0.000574228	0.0155121	-0.086609	1.80933
F8W9J4	DST	Isoform of Q03001, Dystonin OS=Homo sapiens OX=9606 GN=DST PE=1 SV=1	0.0764979	-0.0764979	0.227795	0.0601648	0.0385541	0.0523473	0.121006	0.116832	0.103746	0.0769311	0.136233	0.175897	0.172345	0.150536	0.176892	0.267526	0	-0.00242304	-0.0303554	-0.133373	-0.0548591	-0.137181	-0.117043	-0.0125912	0.526689	4.952	0.000577008	0.0155121	0.284855	1.80933
Q07820	MCL1	Induced myeloid leukemia cell differentiation protein Mcl-1 OS=Homo sapiens OX=9606 GN=MCL1 PE=1 SV=3	-0.0262582	0.0262582	0.0951145	0.110481	0.0507227	0.0943828	0.126662	0.0239309	0.0813461	0.142007	0.110684	0.10196	0.105029	0.0975686	0.118886	0.095236	0	8.68511e-05	0.0455791	0.0787767	-0.00147055	0.0672483	0.0121737	0.00902596	0.669775	6.3	0.000577184	0.0155121	0.0967393	1.80933
Q9P000	COMMD9	COMM domain-containing protein 9 OS=Homo sapiens OX=9606 GN=COMMD9 PE=1 SV=2	0.00934352	-0.00934352	-0.0338557	-0.0357547	-0.0258601	-0.0580536	-0.0836374	-0.109248	-0.0150975	-0.072915	-0.0451678	-0.0477083	-0.0488446	-0.0871741	-0.0694725	-0.096429	0	0.0580063	0.0181905	0.0437348	-0.00959111	0.0328033	0.00599176	0.067888	0.595088	5.97178	0.000585979	0.0156893	-0.066744	1.8044
Q9H0J9	PARP12	Protein mono-ADP-ribosyltransferase PARP12 OS=Homo sapiens OX=9606 GN=PARP12 PE=1 SV=1	-0.0250124	0.0250124	0.0487464	-0.0360477	0.00661039	-0.0296965	-0.0441303	-0.0396896	-0.0808413	0.00342561	-0.0812586	-0.100582	-0.0850192	-0.0226548	-0.105827	-0.173831	0	-0.0101784	-0.0275057	0.000351904	0.0218125	0.0107231	-0.0188237	-0.0250849	0.610025	3.49329	0.000592253	0.0157979	-0.126761	1.8014
P38117	ETFB	Electron transfer flavoprotein subunit beta OS=Homo sapiens OX=9606 GN=ETFB PE=1 SV=3	0.0141129	-0.0141129	-0.0258441	-0.0195539	-0.00283303	-0.0342472	-0.019396	-0.0161688	-0.0362975	-0.0751974	-0.0355818	-0.0878492	-0.0410996	-0.0572568	-0.0614535	-0.0306137	0	0.0528623	0.0609562	0.100001	-0.0146805	0.0471648	0.0902903	0.0146273	0.596491	4.9223	0.000599458	0.0159304	-0.0428632	1.79777
Q8N0Y7	PGAM4	Probable phosphoglycerate mutase 4 OS=Homo sapiens OX=9606 GN=PGAM4 PE=3 SV=1	-0.00935121	0.00935121	0.0465545	0.0598472	-0.0126521	0.0574481	0.0450775	0.233534	0.00385973	0.0917341	0.0431062	0.239931	0.134822	0.174382	0.181724	0.318001	0	0.0943131	0.071094	-0.0297527	0.0819472	0.0592844	0.0271382	0.0556334	0.567592	3.5702	0.000604241	0.0159978	0.222261	1.79594
P11215	ITGAM	Integrin alpha-M OS=Homo sapiens OX=9606 GN=ITGAM PE=1 SV=2	-0.0103484	0.0103484	-0.088989	-0.103373	-0.0222592	-0.039151	-0.00527167	-0.0337811	-0.0567413	-0.0144076	-0.0974105	-0.0891307	-0.153868	-0.0742639	-0.100164	-0.144841	0	-0.00102761	0.0835226	-0.0208875	0.0488104	-0.00441849	0.0608127	0.0188081	0.582675	4.13232	0.000610275	0.0160977	-0.0899295	1.79324
Q9P2E9	RRBP1	Ribosome-binding protein 1 OS=Homo sapiens OX=9606 GN=RRBP1 PE=1 SV=5	-0.00189158	0.00189158	0.0296601	0.062397	0.0421124	0.0796345	0.0288985	0.020083	0.0319735	0.0574647	0.0556922	0.0665278	0.042128	0.0826469	0.062633	0.0493614	0	0.0323784	0.029551	0.0815218	0.0896355	0.0670395	0.0858212	0.0242735	0.333121	4.53283	0.000624947	0.0164239	0.0335538	1.78452
Q6P6C2	ALKBH5	RNA demethylase ALKBH5 OS=Homo sapiens OX=9606 GN=ALKBH5 PE=1 SV=2	0.0562242	-0.0562242	0.0244278	0.0276412	0.0385488	0.0157787	0.039448	0.0706381	-0.00821816	0.100135	0.0870526	0.00224666	0.101519	0.166753	0.183636	0.203877	0	0.0346794	0.0132054	0.0306089	0.0208583	0.0241599	-0.00304523	0.0456624	0.671878	3.38733	0.000634188	0.0165572	0.175003	1.78101
Q8NFH8	REPS2	RalBP1-associated Eps domain-containing protein 2 OS=Homo sapiens OX=9606 GN=REPS2 PE=1 SV=2	0.0367175	-0.0367175	0.0597066	0.189683	0.118576	0.0889189	0.237509	0.0779237	0.127809	0.00250102	0.260213	0.236764	0.111576	0.244639	0.154801	0.324518	0	0.0323634	0.0398507	0.00757061	0.00839274	0.0708459	0.0592632	-0.000125711	0.44529	4.2837	0.000635757	0.0165572	0.147146	1.78101
P08236	GUSB	Beta-glucuronidase OS=Homo sapiens OX=9606 GN=GUSB PE=1 SV=2	0.0422803	-0.0422803	0.0289058	0.0387801	0.0756242	0.058574	0.139997	0.132832	0.122054	0.125625	0.132777	0.437791	0.142863	0.129447	0.167912	0.47586	0	0.0480611	0.0805078	0.107277	0.102953	0.146655	0.132818	0.10501	0.543812	3.89726	0.000636996	0.0165572	0.328879	1.78101
P82979	SARNP	SAP domain-containing ribonucleoprotein OS=Homo sapiens OX=9606 GN=SARNP PE=1 SV=3	0.0280903	-0.0280903	0.0486279	0.00105317	0.0719004	-0.00340805	0.0695057	0.0688459	0.0788905	0.023517	0.0621407	0.0186155	0.0573054	0.0996499	0.0981536	0.0867393	0	-0.00931981	-0.00404708	-0.00839316	0.0328462	-0.0118568	0.0270654	0.0850485	0.523273	4.97137	0.000642955	0.016621	0.12469	1.77934
Q13435	SF3B2	Splicing factor 3B subunit 2 OS=Homo sapiens OX=9606 GN=SF3B2 PE=1 SV=2	0.00213076	-0.00213076	0.0245826	0.0344966	0.0385559	0.0430302	0.0237118	0.00364051	0.0330971	0.0258954	0.0231398	0.0261462	0.0250999	0.0452058	0.0543479	0.0369743	0	-0.0217663	-0.0239936	0.01052	0.0140711	0.0249074	-0.0190105	0.0151198	0.604038	6.13389	0.000644117	0.016621	0.0315703	1.77934
P08240	SRPRA	Signal recognition particle receptor subunit alpha OS=Homo sapiens OX=9606 GN=SRPRA PE=1 SV=2	0.00380577	-0.00380577	-0.0467317	-0.0167098	-0.018089	-0.0231972	-0.0652272	-0.0496864	-0.0348305	0.0216626	-0.0627024	-0.0473908	-0.0496018	-0.0316832	-0.0949945	-0.108784	0	-0.0618382	-0.0517123	0.00419802	-0.0528775	-0.0369751	-0.0466168	-0.0502358	0.440765	4.04556	0.00065291	0.0167414	-0.0518809	1.77621
Q02952	AKAP12	A-kinase anchor protein 12 OS=Homo sapiens OX=9606 GN=AKAP12 PE=1 SV=4	-0.0319822	0.0319822	0.0717278	0.219059	0.0792699	0.0717677	0.121161	0.0683415	0.131453	0.190316	0.125866	0.166034	0.145945	0.143932	0.128503	0.148555	0	-0.0627737	-0.107771	-0.0615315	-0.0469905	-0.0176844	-0.136283	-0.0657772	0.604238	6.3	0.000653485	0.0167414	0.162175	1.77621
Q14207	NPAT	Protein NPAT OS=Homo sapiens OX=9606 GN=NPAT PE=1 SV=3	-0.0498946	0.0498946	-0.0623407	-0.094691	-0.0613483	-0.0337149	-0.0456059	-0.051578	-0.0459728	-0.136237	-0.064019	-0.0520623	-0.112715	-0.0947244	-0.113407	-0.15462	0	-0.00987242	0.0711056	0.0470862	0.0709269	0.00702097	0.0522389	0.0135209	0.517107	4.93147	0.000671372	0.0171346	-0.169132	1.76613
Q9Y2Q3	GSTK1	Glutathione S-transferase kappa 1 OS=Homo sapiens OX=9606 GN=GSTK1 PE=1 SV=3	0.00218389	-0.00218389	-0.0519237	-0.0522776	0.00401691	-0.0605644	-0.0586262	-0.0391872	-0.0944609	-0.101462	-0.0603836	-0.0867255	-0.0734169	-0.0980785	-0.062066	-0.0368658	0	-0.000282535	0.0289511	0.0254234	-0.0448083	0.00315657	0.0496241	-0.0227834	0.623941	6.15241	0.000673643	0.0171346	-0.0865496	1.76613
A2A274	ACO2	Isoform of Q99798, Aconitate hydratase, mitochondrial OS=Homo sapiens OX=9606 GN=ACO2 PE=1 SV=1	-0.0097472	0.0097472	-0.0184632	-0.0229386	0.0156177	-0.0343772	0.00193688	-0.0310884	-0.0413574	-0.0819226	-0.0546242	-0.0371629	-0.0460017	-0.0714752	-0.038841	-0.0476558	0	0.00360823	0.0267903	0.058088	-0.00520788	0.0189041	0.0333898	-0.000437961	0.647625	4.91633	0.000679541	0.0172231	-0.0448671	1.76389
Q9NUM4	TMEM106B	Transmembrane protein 106B OS=Homo sapiens OX=9606 GN=TMEM106B PE=1 SV=2	0.00238042	-0.00238042	0.0419943	0.00882354	0.0671267	0.0701328	0.0608952	0.102705	0.139941	0.0961696	0.0871334	0.0415477	0.0387199	0.10414	0.0899823	0.0609871	0	0.2772	0.287883	0.180644	0.127654	0.196901	0.130291	0.1499	0.693339	5.84313	0.000685295	0.0173073	0.0822644	1.76177
Q00325	SLC25A3	Phosphate carrier protein, mitochondrial OS=Homo sapiens OX=9606 GN=SLC25A3 PE=1 SV=2	0.0490047	-0.0490047	-0.326351	-0.136855	-0.0961849	-0.112582	-0.225265	-0.232274	-0.160815	-0.0344598	-0.290929	-0.222753	-0.35141	-0.14645	-0.282456	-0.284813	0	0.300584	0.838215	-0.287787	-0.0849337	0.199871	0.459497	0.686476	0.359033	4.1363	0.000690619	0.0173614	-0.155937	1.76042
Q10567	AP1B1	AP-1 complex subunit beta-1 OS=Homo sapiens OX=9606 GN=AP1B1 PE=1 SV=2	0.00770904	-0.00770904	0.0286685	0.0346495	-0.0397125	0.0529195	-0.0336308	-0.0405139	-0.21451	-0.122178	-0.015968	-0.144131	-0.110755	-0.116198	-0.181332	-0.0808984	0	-0.0170134	-0.0232645	0.00669128	-0.0248569	-0.0558456	-0.111749	-0.0491291	0.69288	4.96935	0.00069231	0.0173614	-0.132816	1.76042
P05164	MPO	Myeloperoxidase OS=Homo sapiens OX=9606 GN=MPO PE=1 SV=1	-0.0165493	0.0165493	0.0446989	-0.00873796	0.0224212	0.00725404	0.0458667	0.0539798	0.0362094	0.0375905	0.0460337	0.0247881	0.0574854	0.026888	0.128781	0.0540025	0	0.120413	0.105226	0.120542	0.0385801	0.088839	0.167153	0.137911	0.533782	3.579	0.000696944	0.0174163	0.0790857	1.75905
Q969S3	ZNF622	Zinc finger protein 622 OS=Homo sapiens OX=9606 GN=ZNF622 PE=1 SV=1	0.0246192	-0.0246192	0.0455079	0.00651242	0.00627407	-0.00110378	-0.0273975	0.00811912	-0.00559484	0.0265154	0.0171778	0.0260958	0.0390066	0.0447407	0.0761274	0.115776	0	0.0181537	-0.00335529	0.0517637	0.0353842	0.0554368	0.050273	0.0722466	0.692045	3.2793	0.000705245	0.01752	0.0896602	1.75646
Q8IXQ3	C9orf40	Uncharacterized protein C9orf40 OS=Homo sapiens OX=9606 GN=C9orf40 PE=1 SV=1	-0.0148308	0.0148308	0.0672608	0.172211	0.105389	0.0869854	0.0338717	0.040379	0.129691	0.0798669	0.0889623	0.160182	0.159873	0.181629	0.151006	0.0820423	0	0.015755	-0.0477123	0.0584408	0.018787	-0.0177736	0.168338	0.0252928	0.416013	4.5484	0.000706017	0.01752	0.0866755	1.75646
Q14914	PTGR1	Prostaglandin reductase 1 OS=Homo sapiens OX=9606 GN=PTGR1 PE=1 SV=2	-0.0398734	0.0398734	-0.0164927	0.00123665	-0.0803041	-0.0189486	-0.0782741	-0.0550981	0.00940791	-0.0818936	0.0506279	-0.0109576	0.0114464	0.0719709	0.128972	0.205351	0	0.0620442	0.0890295	0.127727	0.055734	0.0899857	0.0494375	0.053899	0.691719	3.25681	0.000710349	0.0175568	0.187957	1.75556
P01127	PDGFB	Platelet-derived growth factor subunit B OS=Homo sapiens OX=9606 GN=PDGFB PE=1 SV=1	0.0448084	-0.0448084	0.181634	0.152033	0.121115	0.22985	0.116502	0.157354	0.101814	0.132472	0.223862	0.287677	0.259847	0.202897	0.109445	0.201871	NA	NA	NA	NA	NA	NA	NA	NA	0.354504	4.45077	0.000715433	0.0175568	0.120042	1.75556
O14732	IMPA2	Inositol monophosphatase 2 OS=Homo sapiens OX=9606 GN=IMPA2 PE=1 SV=1	0.0281201	-0.0281201	0.0765675	0.00986833	0.0352358	0.0610861	0.0679707	0.0104117	0.000148898	0.0385119	0.0804914	0.0597977	0.177479	0.109531	0.150997	0.0717568	0	0.0259558	0.141204	0.164253	0.053814	-0.114567	0.137799	0.031577	0.622463	3.98811	0.000717306	0.0175568	0.102461	1.75556
P20700	LMNB1	Lamin-B1 OS=Homo sapiens OX=9606 GN=LMNB1 PE=1 SV=2	0.00570916	-0.00570916	-0.00751935	0.0181734	-0.00842928	0.0306838	0.0423722	0.0254316	0.0106861	0.0219553	-0.0251909	-0.00122655	-0.0229227	-0.0183714	-0.0621318	-0.052774	0	-0.0774377	-0.0330588	-0.0299022	-0.0597994	-0.0294139	-0.0637095	-0.0130425	0.691274	3.38798	0.000717357	0.0175568	-0.0670732	1.75556
P62736	ACTA2	Actin, aortic smooth muscle OS=Homo sapiens OX=9606 GN=ACTA2 PE=1 SV=1	0.0100009	-0.0100009	0.0372839	0.00380178	0.0213162	0.0104894	0.0305381	0.000969345	0.0303686	0.0101404	0.0441741	0.0542967	0.0159673	0.0383246	0.0355179	0.0774641	0	0.0374779	0.0543737	0.0639803	0.0409584	0.0420979	0.0466366	0.0781028	0.487515	4.47811	0.000723456	0.0176454	0.0338519	1.75337
Q86X10	RALGAPB	Ral GTPase-activating protein subunit beta OS=Homo sapiens OX=9606 GN=RALGAPB PE=1 SV=1	0.00894486	-0.00894486	-0.0183275	-0.0272475	0.00644413	-0.00645428	-0.020572	-0.0163536	-0.0475811	-0.032	-0.0435784	-0.0819412	-0.0819604	-0.0874416	-0.010603	-0.058222	0	0.0185068	-0.0668366	-0.0155138	-0.0185224	-0.0430863	-0.0644258	-0.0239108	0.645405	4.66579	0.000731811	0.0177852	-0.0548184	1.74994
O75558	STX11	Syntaxin-11 OS=Homo sapiens OX=9606 GN=STX11 PE=1 SV=1	0.000727702	-0.000727702	-0.0343274	-0.00903443	-0.0531949	-0.0578529	-0.0473301	-0.0678877	-0.0572742	-0.0634624	-0.120161	-0.0745078	-0.0818917	0.0083769	-0.0741677	-0.172891	0	-0.0951903	-0.0947932	-0.104113	-0.0858718	-0.0229236	-0.084787	-0.0481331	0.515916	5.16171	0.000734183	0.0177852	-0.144711	1.74994
P00352	ALDH1A1	Retinal dehydrogenase 1 OS=Homo sapiens OX=9606 GN=ALDH1A1 PE=1 SV=2	0.0105864	-0.0105864	0.0307926	-0.00990308	0.0068267	-0.00315204	-0.0106685	0.00480657	0.0161874	-0.0171027	0.0363842	0.031623	0.0196719	0.0291461	0.0625037	0.0699208	0	0.0341043	0.0276768	0.0379164	0.0387761	0.01088	0.0214546	-0.0321002	0.688816	3.32049	0.000757193	0.0182804	0.0602651	1.73801
Q8WVR3	TRAPPC14	Trafficking protein particle complex subunit 14 OS=Homo sapiens OX=9606 GN=TRAPPC14 PE=1 SV=2	0.00598681	-0.00598681	-0.0742509	0.0368485	-0.00115587	-0.0105998	-0.0385014	-0.0830115	-0.0385705	-0.0299934	0.0229995	-0.0588732	0.0701676	0.0242787	0.18898	0.0927216	0	-0.0602223	-0.04374	-0.0325886	-0.0630071	-0.080328	-0.0103185	0.00504147	0.688535	3.48277	0.000761857	0.0183309	0.160737	1.73682
Q96GX9	APIP	Methylthioribulose-1-phosphate dehydratase OS=Homo sapiens OX=9606 GN=APIP PE=1 SV=1	0.0224052	-0.0224052	0.0332843	0.0213008	0.045794	0.0761479	0.0494974	0.0697653	0.0954192	0.0456473	0.143005	-0.00487406	0.173198	0.207272	0.293705	0.0605736	0	-0.041167	-0.023937	-0.0157814	0.0394323	0.0319143	0.0600168	0.125048	0.557236	3.74435	0.000768194	0.0184211	0.178999	1.73468
P25942	CD40	Tumor necrosis factor receptor superfamily member 5 OS=Homo sapiens OX=9606 GN=CD40 PE=1 SV=1	0.0325196	-0.0325196	0.0270874	-0.00635445	0.00594614	0.0473903	0.0192975	0.00763023	0.0234908	0.000268453	-0.00014974	-0.0716502	-0.081503	-0.0674015	-0.0562298	-0.0918137	NA	NA	NA	NA	NA	NA	NA	NA	0.687883	4.00943	0.000772788	0.0184691	-0.0846364	1.73355
Q9H0M0	WWP1	NEDD4-like E3 ubiquitin-protein ligase WWP1 OS=Homo sapiens OX=9606 GN=WWP1 PE=1 SV=1	-0.00227686	0.00227686	0.068768	0.022657	0.0163509	0.0602395	0.00167314	0.0640721	0.0227506	-0.0471302	0.104462	0.0287844	0.149892	0.116479	0.159643	0.0955953	NA	NA	NA	NA	NA	NA	NA	NA	0.686232	3.98699	0.000801057	0.0190807	0.112959	1.71941
Q96B45	BORCS7	BLOC-1-related complex subunit 7 OS=Homo sapiens OX=9606 GN=BORCS7 PE=3 SV=2	-0.00190908	0.00190908	0.031529	-0.0246647	0.0274283	0.0131592	-0.0270091	-0.043535	0.0182835	0.0199489	0.0224017	-0.0470176	-0.0888375	-0.0218454	-0.0939131	-0.126967	0	0.0579761	0.0935816	0.0419126	0.0455417	0.0765741	0.0301336	0.0397218	0.68538	3.49272	0.000815986	0.0193313	-0.111342	1.71374
P16383	GCFC2	Intron Large complex component GCFC2 OS=Homo sapiens OX=9606 GN=GCFC2 PE=1 SV=2	0.0384503	-0.0384503	0.000306131	-0.177187	-0.00976194	-0.0438884	-0.045524	0.0663202	-0.0193019	0.0534175	0.00789059	0.0606255	0.122671	0.0435298	0.32187	0.188921	0	-0.00323806	-0.0169226	-0.0214379	0.00346792	-0.0135464	-0.000263653	-0.0223746	0.685322	3.26472	0.000817007	0.0193313	0.260597	1.71374
Q00587	CDC42EP1	Cdc42 effector protein 1 OS=Homo sapiens OX=9606 GN=CDC42EP1 PE=1 SV=1	-0.0022354	0.0022354	-0.00560536	0.205208	-0.0180767	0.0429153	-0.082207	0.094545	-0.0724912	0.104343	0.122594	0.0966177	0.0574963	0.216623	0.341805	0.373583	0	-0.0568787	-0.0295126	-0.169413	-0.210185	-0.204979	-0.138486	-0.171005	0.685049	3.25727	0.000821849	0.0193815	0.321061	1.71261
O00602	FCN1	Ficolin-1 OS=Homo sapiens OX=9606 GN=FCN1 PE=1 SV=2	0.000991517	-0.000991517	0.0111344	-0.0531917	-0.00736926	0.0196351	-0.0347749	0.0397012	-0.0565957	-0.0057879	-0.0375076	0.0263491	-0.0712833	-0.0196162	-0.11835	-0.138891	0	-0.0561855	-0.120705	-0.184239	-0.117363	-0.171376	-0.183824	-0.287858	0.684375	3.48426	0.000833898	0.0196007	-0.121592	1.70773
P55265	ADAR	Double-stranded RNA-specific adenosine deaminase OS=Homo sapiens OX=9606 GN=ADAR PE=1 SV=4	-0.0119026	0.0119026	-0.0305443	-0.0137599	-0.0229059	-0.0130643	-0.0301007	5.28654e-05	0.0038245	0.00896346	-0.0204948	0.00735652	-0.043162	-0.0268842	-0.0682925	-0.0652533	0	0.00692096	-0.0219139	-0.012191	-0.00165638	-0.0178435	-0.0270393	0.0143355	0.684043	3.51499	0.000839894	0.0196767	-0.0588683	1.70605
Q9UMZ2	SYNRG	Synergin gamma OS=Homo sapiens OX=9606 GN=SYNRG PE=1 SV=2	0.00885792	-0.00885792	0.0199427	0.0470425	0.0211243	0.041775	-0.00266435	0.0261685	0.0532752	0.0461643	0.00871505	0.0219399	0.0752182	0.0422347	0.0617078	0.061167	0	0.023061	0.019669	0.0101082	0.0227531	0.0309592	0.0071765	0.0105678	0.503594	4.97526	0.00084805	0.0198027	0.0797359	1.70328
Q53F23	TBXAS1	Isoform of P24557, HCG14925, isoform CRA_a (Fragment) OS=Homo sapiens OX=9606 GN=TBXAS1 PE=1 SV=1	-0.0243521	0.0243521	-0.132247	-0.068969	-0.0240546	-0.110714	-0.0259725	-0.032003	-0.0823396	-0.0248108	-0.153475	-0.0702111	-0.252752	-0.110552	-0.136027	-0.166605	0	0.0601592	0.133039	0.039916	-0.0046812	0.0675048	0.0798365	0.0734216	0.548762	4.01245	0.000854019	0.0198769	-0.124728	1.70165
Q93077	H2AC6	Histone H2A type 1-C OS=Homo sapiens OX=9606 GN=H2AC6 PE=1 SV=3	0.0376043	-0.0376043	-0.152586	-0.0462091	-0.0238762	-0.0686523	-0.104986	-0.10656	-0.101537	-0.0154035	-0.138074	-0.0910876	-0.0509476	-0.120618	-0.176392	-0.18519	0	0.0759633	0.124847	-0.0691175	-0.0784141	0.0544167	0.0527458	0.0551426	0.501856	4.6666	0.000866024	0.0200906	-0.208019	1.69701
Q9BXW7	HDHD5	Haloacid dehalogenase-like hydrolase domain-containing 5 OS=Homo sapiens OX=9606 GN=HDHD5 PE=1 SV=1	0.0132396	-0.0132396	-0.126181	-0.104743	-0.00537006	-0.0448709	0.00976784	-0.104588	-0.0365327	-0.0523533	-0.128003	-0.102533	-0.123233	-0.119173	-0.200716	-0.0984042	0	0.101273	0.100902	0.0576324	0.0761996	0.0158242	0.0622181	0.0142399	0.500619	4.18161	0.000892604	0.02059	-0.100101	1.68634
Q7Z6K5	ARPIN	Arpin OS=Homo sapiens OX=9606 GN=ARPIN PE=1 SV=1	-0.0299307	0.0299307	0.0579594	0.0726745	0.0244308	0.0212889	-0.0130443	0.0659469	0.0464391	0.101453	0.0851342	0.0735494	0.0521312	0.0853845	0.104927	0.0772718	0	0.0272654	0.0324311	0.0792566	0.0200186	0.0185377	0.0334583	0.0119308	0.50513	5.48638	0.000900204	0.02059	0.128564	1.68634
A0A1B0GW23	ABHD14A-ACY1	ABHD14A-ACY1 readthrough, N-acyl-L-amino-acid amidohydrolase (Fragment) OS=Homo sapiens OX=9606 GN=ABHD14A-ACY1 PE=3 SV=1	0.00271613	-0.00271613	0.0562353	0.0621289	0.0337509	0.00224402	0.0442569	0.0535309	0.0277727	-0.0110373	0.0501178	0.0936883	0.0523081	0.0461382	0.100409	0.10216	0	0.0209691	0.0143885	0.0273995	0.00890915	0.0311605	0.0283041	0.0229233	0.480881	4.13254	0.000901247	0.02059	0.0528902	1.68634
P49137	MAPKAPK2	MAP kinase-activated protein kinase 2 OS=Homo sapiens OX=9606 GN=MAPKAPK2 PE=1 SV=1	-0.00151422	0.00151422	0.021299	0.0119938	-0.0113432	0.00290415	0.022973	-0.00307507	-0.0231375	-0.0537871	-0.0178361	-0.0227192	-0.0242571	-0.05609	-0.0572286	-0.0236099	0	0.0537531	0.0386598	0.0649715	0.0227603	0.0128585	0.0365419	0.0175303	0.680686	4.75205	0.000902548	0.02059	-0.0394272	1.68634
D6RBW1	EIF4E	Isoform of P06730, Eukaryotic translation initiation factor 4E OS=Homo sapiens OX=9606 GN=EIF4E PE=1 SV=1	0.0132509	-0.0132509	-0.0263759	-0.0534107	-0.0428786	-0.0481069	-0.0981979	-0.0658047	-0.0541628	-0.0636908	-0.0501435	-0.0397407	-0.0481264	-0.0489024	-0.0403506	-0.0402927	0	0.0125552	0.0191962	-0.00339918	0.0265526	0.00576352	0.0174741	0.0550108	0.680661	6.22014	0.000903011	0.02059	-0.0542641	1.68634
Q8TCU4	ALMS1	Alstrom syndrome protein 1 OS=Homo sapiens OX=9606 GN=ALMS1 PE=1 SV=4	-0.0170244	0.0170244	-0.00669061	0.0586566	0.0818193	-0.00837386	0.0127655	-0.060092	0.0112845	0.0984645	0.0911107	0.102306	0.139384	0.0730889	0.136944	0.256957	0	-0.00202725	-0.0732991	-0.0181758	-0.0313892	-0.00669258	-0.0392881	-0.0100509	0.680563	3.4252	0.000904898	0.02059	0.180961	1.68634
Q9NRR3	CDC42SE2	CDC42 small effector protein 2 OS=Homo sapiens OX=9606 GN=CDC42SE2 PE=1 SV=1	-0.0161659	0.0161659	0.026734	0.0330565	0.0759138	0.0904917	0.0389238	0.0856082	0.0642586	0.0849524	0.0597557	0.0856277	0.0930247	0.0408013	0.0230637	0.0705642	0	0.0996313	0.00726105	0.132942	-0.0194427	0.0690737	0.0299734	0.113713	0.679518	5.98822	0.000925243	0.0209362	0.0677501	1.6791
P55010	EIF5	Eukaryotic translation initiation factor 5 OS=Homo sapiens OX=9606 GN=EIF5 PE=1 SV=2	0.01784	-0.01784	0.00301282	0.0116223	-4.78731e-06	0.000555439	-0.0177307	-0.0348625	-0.0375966	-0.0536497	-0.0272251	-0.0515941	-0.0183647	-0.042244	-0.0209539	-0.0343814	0	-0.00789155	-0.023065	-0.0237161	-0.0154222	-0.0297854	-0.0188166	-0.0509613	0.67948	5.05465	0.000925989	0.0209362	-0.0376501	1.6791
Q8NFC6	BOD1L1	Biorientation of chromosomes in cell division protein 1-like 1 OS=Homo sapiens OX=9606 GN=BOD1L1 PE=1 SV=2	0.004665	-0.004665	0.0264331	0.0361762	0.0334813	0.0384935	0.0165819	0.0377379	0.0408493	0.0393275	0.0507193	0.0446445	0.0121515	0.0392076	0.0367846	0.0191014	0	0.0317884	0.0417552	0.0385868	0.0439073	0.0422394	0.0218655	0.0386519	0.679168	6.12097	0.000932132	0.0209573	0.03409	1.67866
Q6ZU80-1	CEP128	Isoform of Q6ZU80, Isoform 1 of Centrosomal protein of 128 kDa OS=Homo sapiens OX=9606 GN=CEP128 PE=1 SV=2	-0.00787829	0.00787829	0.0609719	0.0332977	0.111925	0.0894987	0.206225	0.094015	0.0538932	0.107558	0.193116	0.356816	0.309581	0.0984034	0.151079	0.137281	NA	NA	NA	NA	NA	NA	NA	NA	0.547372	5.49183	0.00093281	0.0209573	0.200866	1.67866
Q7Z3D4	LYSMD3	LysM and putative peptidoglycan-binding domain-containing protein 3 OS=Homo sapiens OX=9606 GN=LYSMD3 PE=1 SV=2	-0.0363269	0.0363269	-0.0113574	-0.0707104	-0.043777	-0.0205029	-0.134186	-0.00286885	-0.0819313	-0.0131795	0.0437035	0.0141214	0.151857	0.102409	0.114812	0.0740609	0	-0.364841	-0.204219	-0.284063	-0.253347	-0.210233	-0.244406	-0.342871	0.678875	3.98484	0.000937947	0.0210065	0.142333	1.67765
Q14444	CAPRIN1	Caprin-1 OS=Homo sapiens OX=9606 GN=CAPRIN1 PE=1 SV=2	-0.0110198	0.0110198	-0.00352372	-0.0575388	0.00202223	-0.000723331	-0.00204684	-0.013847	0.0029252	-0.0178171	0.00407427	0.00344008	-0.00186912	0.0300779	0.0789592	0.0548445	0	0.0569979	0.0437307	0.0629742	0.0831467	0.0604046	0.0564831	0.0593832	0.678417	3.22197	0.000947097	0.0211449	0.07276	1.67479
P43246	MSH2	DNA mismatch repair protein Msh2 OS=Homo sapiens OX=9606 GN=MSH2 PE=1 SV=1	-0.00182624	0.00182624	0.00179025	0.0181276	-0.00943736	0.0107784	-0.0274657	-0.00188158	-0.0115555	-0.0308285	-0.00917607	-0.0209467	-0.00708282	-0.0278549	-0.0332639	-0.0392561	0	0.0462038	0.00185141	0.0381461	-0.00404397	0.0257722	0.0168133	0.0285005	0.568897	3.61435	0.000960778	0.0213618	-0.0365493	1.67036
O15455	TLR3	Toll-like receptor 3 OS=Homo sapiens OX=9606 GN=TLR3 PE=1 SV=1	-0.00393016	0.00393016	0.0118001	-0.00562116	-0.0468297	0.0979601	0.0744814	0.125789	0.069329	0.0213997	0.0665925	0.104694	0.0662595	0.114112	0.0692168	0.131366	NA	NA	NA	NA	NA	NA	NA	NA	0.564699	5.47923	0.000964545	0.0213618	0.0832966	1.67036
Q9C0C2	TNKS1BP1	182 kDa tankyrase-1-binding protein OS=Homo sapiens OX=9606 GN=TNKS1BP1 PE=1 SV=4	-0.00332885	0.00332885	0.0125729	0.0231007	0.0121205	0.0366547	0.0403765	0.00598461	0.0245485	0.0358959	0.0322777	0.0818704	0.00574365	0.0476831	0.0513146	0.0480146	0	-0.00827668	-0.0168013	0.0174933	0.0407057	0.0290454	0.0629117	0.0295804	0.509532	6.07528	0.000967929	0.0213618	0.0686404	1.67036
A0A182DWE9	HLA-DPB1	Isoform of P04440, HLA class II histocompatibility antigen DP beta chain OS=Homo sapiens OX=9606 GN=HLA-DPB1 PE=1 SV=1	-0.0151256	0.0151256	0.0219336	0.0588987	-0.0297697	0.0592596	0.0218848	0.0447828	0.0328986	0.020824	0.0829604	0.0844452	0.130456	0.119033	0.0643803	0.0512068	0	0.066102	0.068959	0.0798848	0.0456346	0.0656904	0.159878	0.0553209	0.594468	4.29121	0.000968809	0.0213618	0.0732724	1.67036
Q92828	CORO2A	Coronin-2A OS=Homo sapiens OX=9606 GN=CORO2A PE=1 SV=2	0.0171844	-0.0171844	-0.0116834	0.0227639	0.00801792	0.00537851	-0.0368266	-0.0238635	0.0204859	-0.0537985	-0.055821	-0.0855692	-0.0319273	-0.0517917	-0.0834989	-0.0563282	0	-0.00201545	0.0323646	0.0157286	0.0503526	-0.00275236	0.00115582	0.0120798	0.591207	4.46191	0.000977323	0.021483	-0.057204	1.6679
A0A3B3IRI0	OGFRL1	Isoform of Q5TC84, Opioid growth factor receptor-like protein 1 OS=Homo sapiens OX=9606 GN=OGFRL1 PE=1 SV=1	0.00837127	-0.00837127	0.0935937	0.0469913	0.0345069	0.114323	0.00505511	0.067078	0.0734066	0.0505012	0.109249	0.175735	0.0886552	0.053562	0.0956466	0.13061	0	-0.0984299	-0.0783947	-0.0948183	-0.0278447	-0.0122903	-0.0588375	-0.0624593	0.434765	4.49296	0.000994881	0.021797	0.0727559	1.6616
F5H6T4	ITGB7	Isoform of P26010, Integrin beta OS=Homo sapiens OX=9606 GN=ITGB7 PE=1 SV=1	0.0162311	-0.0162311	-0.0894402	-0.0207686	-0.0896043	-0.100737	-0.0603433	-0.0729173	-0.0738583	-0.139307	-0.0808907	-0.0350177	-0.149894	-0.0430042	-0.0982367	-0.126242	NA	NA	NA	NA	NA	NA	NA	NA	0.577042	6.02405	0.00100004	0.021797	-0.0891716	1.6616
P78324	SIRPA	Tyrosine-protein phosphatase non-receptor type substrate 1 OS=Homo sapiens OX=9606 GN=SIRPA PE=1 SV=2	-0.0264426	0.0264426	0.0278559	0.03345	0.0403974	0.0677502	0.0193472	0.0244956	0.0311868	0.0133604	0.0632645	0.0510157	0.0457508	0.0361998	0.0807787	0.0728027	0	-0.0171811	0.0187638	-0.00170429	0.0278699	0.0258959	0.0383126	0.0393887	0.377956	4.23667	0.00100079	0.021797	0.0376227	1.6616
Q9Y570	PPME1	Protein phosphatase methylesterase 1 OS=Homo sapiens OX=9606 GN=PPME1 PE=1 SV=3	0.00576107	-0.00576107	-0.041599	0.022772	0.00969004	0.0455928	-0.0189412	0.026534	0.0734679	-0.00151701	0.0618072	0.0209109	0.0901655	0.0495004	0.114341	0.0622005	0	0.0246199	-0.00586266	-0.019809	-0.0186551	-0.0121177	-0.00969238	0.0152226	0.596027	3.60867	0.00101378	0.0219541	0.09018	1.65849
O00399	DCTN6	Dynactin subunit 6 OS=Homo sapiens OX=9606 GN=DCTN6 PE=1 SV=1	-0.00200059	0.00200059	0.00706911	-0.030696	-0.00729344	0.0139783	0.00241522	-0.0223478	0.0302892	-0.0146324	0.0126105	0.0236683	0.0385442	0.0389991	0.0806891	0.0342239	0	-0.0696273	-0.0399477	0.097378	-0.0433686	-0.0930161	-0.0300937	-0.0101244	0.675109	3.68593	0.00101537	0.0219541	0.0607843	1.65849
Q8N257	H2BU1	Histone H2B type 3-B OS=Homo sapiens OX=9606 GN=H2BU1 PE=1 SV=3	0.000299132	-0.000299132	-0.297623	-0.0891907	-0.0261537	-0.0560142	-0.0894263	-0.104178	-0.107982	0.0209492	-0.205826	-0.157848	-0.247294	-0.168049	-0.247197	-0.308031	0	0.125911	0.19842	-0.107464	-0.0271731	0.0600461	0.158076	0.276345	0.528854	4.03727	0.00101725	0.0219541	-0.180195	1.65849
Q9NSY1	BMP2K	BMP-2-inducible protein kinase OS=Homo sapiens OX=9606 GN=BMP2K PE=1 SV=2	-0.0206115	0.0206115	-0.0730005	-0.02373	-0.0367849	-0.0341787	-0.0498271	-0.162172	-0.107578	-0.0923527	-0.0559782	-0.0812299	-0.079597	-0.106361	-0.0927087	-0.07096	0	-0.000192204	-0.00948473	0.119517	0.0665333	-0.0814439	0.0369608	0.0707018	0.602386	5.84851	0.00102321	0.022016	-0.0898274	1.65726
P10124	SRGN	Serglycin OS=Homo sapiens OX=9606 GN=SRGN PE=1 SV=3	0.00218608	-0.00218608	0.0833077	0.040876	0.0267107	0.0926249	0.101144	0.0950588	0.0399418	0.0889272	0.0911246	0.112409	0.07948	0.0897024	0.0375402	0.097995	0	-0.0424895	0.0157635	0.00497964	-0.0100028	0.0471772	0.0289658	0.0289827	0.674201	6.3	0.00102787	0.0220498	0.0875871	1.6566
Q9NPE3	NOP10	H/ACA ribonucleoprotein complex subunit 3 OS=Homo sapiens OX=9606 GN=NOP10 PE=1 SV=1	0.0215456	-0.0215456	0.032244	0.0146844	0.0526483	0.0161181	0.00766631	0.011753	0.000123596	-0.00259394	0.0135983	0.0392604	0.0498567	0.0687834	0.0814933	0.084548	0	-0.213585	-0.262119	-0.313819	-0.19356	-0.196168	-0.246545	-0.198345	0.674048	3.66185	0.00103813	0.0222028	0.0713093	1.65359
A0A2Y9D025	NDUFA6	Isoform of P56556, Complex I-B14 OS=Homo sapiens OX=9606 GN=NDUFA6 PE=1 SV=1	0.0349152	-0.0349152	-0.301648	-0.0559785	-0.0673315	-0.121007	-0.122232	-0.119475	-0.183825	0.0010547	-0.319239	-0.112075	-0.433618	-0.146021	-0.340663	-0.267118	0	-0.0636187	0.0264127	-0.119242	-0.138041	-0.06581	-0.0852668	0.0271045	0.475896	4.08458	0.00104959	0.0223807	-0.229866	1.65013
Q5T7V8	GORAB	RAB6-interacting golgin OS=Homo sapiens OX=9606 GN=GORAB PE=1 SV=2	0.0166104	-0.0166104	-0.0148627	-0.0227408	-0.0491298	0.0231091	-0.0542967	-0.082788	0.0999953	0.260319	0.158842	0.160592	0.109696	0.0318786	0.13907	0.0550961	0	0.0248009	0.0713298	0.00728132	0.0948215	0.12801	-0.0461539	0.0162217	0.673202	4.76371	0.00105659	0.0224508	0.147168	1.64877
P16070	CD44	CD44 antigen OS=Homo sapiens OX=9606 GN=CD44 PE=1 SV=3	0.0156741	-0.0156741	-0.0189323	-0.0283099	0.0110194	0.00924706	-0.0166694	0.0239642	-3.05878e-05	-0.0400847	-0.0380147	-0.0759396	-0.0636469	-0.0345709	-0.0621141	-0.0939158	0	-0.110857	-0.124047	-0.087911	-0.0807192	-0.0915197	-0.121555	-0.132083	0.673084	4.34451	0.00105918	0.0224508	-0.0624525	1.64877
P36402	TCF7	Transcription factor 7 OS=Homo sapiens OX=9606 GN=TCF7 PE=1 SV=3	0.043124	-0.043124	-0.0122334	-0.0538616	-0.0488302	-0.0605622	-0.123268	-0.0884764	0.0286354	-0.0304031	-0.119757	-0.0706107	-0.209868	-0.0373418	-0.244167	-0.198139	0	0.0496599	-0.0233146	0.0521881	-0.0116545	0.0269132	-0.0508349	-0.0309295	0.588866	3.32197	0.00107173	0.0226495	-0.183407	1.64494
Q92879	CELF1	CUGBP Elav-like family member 1 OS=Homo sapiens OX=9606 GN=CELF1 PE=1 SV=2	0.0157017	-0.0157017	0.00224574	-0.00125049	-0.0811332	-0.076254	-0.054747	-0.013717	-0.0439704	-0.003814	-0.083304	-0.0131801	-0.0852041	-0.13031	-0.0944905	-0.0726697	0	-0.0209203	-0.0099932	-0.00941805	0.00909399	-0.00697332	-0.0317275	0.0535386	0.491286	3.96904	0.00107927	0.0226898	-0.0729519	1.64417
Q6ZNW5	GDPGP1	GDP-D-glucose phosphorylase 1 OS=Homo sapiens OX=9606 GN=GDPGP1 PE=1 SV=2	-0.00198639	0.00198639	0.0353769	0.0396336	0.0644706	-0.0412604	0.0344873	0.0543427	0.0391408	0.0255085	0.0857697	0.0367866	0.155021	0.129671	0.0525658	0.245407	0	-0.0845316	-0.0537264	-0.0555268	-0.049814	-0.0447472	-0.0701854	-0.0755379	0.611647	3.88465	0.00108692	0.0226898	0.130839	1.64417
H0YDT6	EIF3F	Isoform of O00303, Eukaryotic translation initiation factor 3 subunit F OS=Homo sapiens OX=9606 GN=EIF3F PE=1 SV=2	0.0159749	-0.0159749	-0.00152014	-0.027593	-0.01108	-0.0173038	-0.031971	-0.00236221	-0.0237089	-0.0614431	-0.0193924	-0.0855455	-0.0621029	-0.051534	-0.0346595	-0.0421913	0	-0.0822372	-0.0397786	-0.0387495	-0.0486031	-0.0228308	-0.0760067	-0.101151	0.549417	4.8211	0.00108838	0.0226898	-0.0429144	1.64417
O75146	HIP1R	Huntingtin-interacting protein 1-related protein OS=Homo sapiens OX=9606 GN=HIP1R PE=1 SV=2	-0.0131529	0.0131529	-0.0264939	0.00361286	-0.0141431	-0.00602419	-0.0212831	0.00269973	-0.00113464	-0.0162992	-0.0272479	-0.0105865	-0.0203341	-0.0583671	-0.0501257	-0.0620646	0	0.0343565	-0.0387904	-0.0405368	-0.00740843	-0.00782173	-0.0423027	0.0123114	0.661137	3.59646	0.00108952	0.0226898	-0.050648	1.64417
Q9H0S4	DDX47	Probable ATP-dependent RNA helicase DDX47 OS=Homo sapiens OX=9606 GN=DDX47 PE=1 SV=1	-0.0089482	0.0089482	-0.0321472	-0.00322612	-0.0530526	-0.0339618	-0.0900305	-0.0525584	-0.0470436	-0.0361944	-0.0899201	-0.0961235	-0.0714939	-0.0187174	-0.042393	-0.0722027	0	0.0277933	0.025504	-0.0573454	0.053591	-0.0276489	-0.00641419	0.0385984	0.626345	5.76956	0.00109174	0.0226898	-0.0614627	1.64417
Q6TCH4	PAQR6	Membrane progestin receptor delta OS=Homo sapiens OX=9606 GN=PAQR6 PE=1 SV=2	0.131037	-0.131037	-0.110079	-0.166901	-0.088902	-0.122821	-0.297054	-0.0475885	0.0402405	-0.122007	-0.262653	-0.188456	-0.327611	-0.253663	-0.461388	-0.262246	0	-0.357423	-0.192867	-0.572842	-0.261647	-0.320237	-0.620731	-0.491819	0.501995	4.02063	0.00109692	0.0226898	-0.249985	1.64417
Q9Y2R2	PTPN22	Tyrosine-protein phosphatase non-receptor type 22 OS=Homo sapiens OX=9606 GN=PTPN22 PE=1 SV=2	0.00217398	-0.00217398	0.129112	0.0172769	0.16015	0.224176	0.0362025	0.145155	0.12247	0.0663774	0.0617792	0.248548	0.219069	0.198572	0.132549	0.190474	0	0.0218659	-0.00252138	-0.0367317	0.00375936	0.00813577	-0.0208175	0.0412827	0.51861	6.3	0.00109869	0.0226898	0.21601	1.64417
Q9UHA4	LAMTOR3	Ragulator complex protein LAMTOR3 OS=Homo sapiens OX=9606 GN=LAMTOR3 PE=1 SV=1	-0.0047856	0.0047856	0.0166896	0.023142	-0.00467492	0.0399516	0.0288116	0.017701	0.0540091	-0.00498548	0.0166285	0.0489466	0.0518181	0.048812	0.0335707	0.0423173	0	-0.0993066	-0.130725	-0.0428848	-0.0814187	-0.0772811	-0.139621	-0.188772	0.496272	5.53284	0.00109912	0.0226898	0.0645062	1.64417
Q96BM9	ARL8A	ADP-ribosylation factor-like protein 8A OS=Homo sapiens OX=9606 GN=ARL8A PE=1 SV=1	0.0165882	-0.0165882	-0.0180357	0.0614535	-0.000608932	0.048412	0.0104246	0.0105182	0.0774287	0.0923666	0.0751684	0.163133	0.0977364	0.037212	0.0856138	0.0814204	0	-0.0172375	-0.0285952	-0.0554864	-0.0113272	-0.0146182	0.00256643	0.0295023	0.63889	4.65576	0.00110605	0.0227668	0.0788505	1.6427
Q9NTX7	RNF146	E3 ubiquitin-protein ligase RNF146 OS=Homo sapiens OX=9606 GN=RNF146 PE=1 SV=1	0.0242459	-0.0242459	0.104285	0.022597	0.0988998	0.0303068	0.0277129	0.0816541	0.0595242	0.108177	0.0974407	0.132659	0.231009	0.0519087	0.0734693	0.143168	NA	NA	NA	NA	NA	NA	NA	NA	0.500023	6.01935	0.00111951	0.0229561	0.188309	1.6391
O75369-8	FLNB	Isoform of O75369, Isoform 8 of Filamin-B OS=Homo sapiens OX=9606 GN=FLNB PE=1 SV=2	-0.00301994	0.00301994	0.000796465	0.0138079	0.0106208	0.00469309	0.00295974	-0.00559249	0.00126285	-0.00565352	0.0192384	0.00129719	0.0149882	0.0305102	0.0242802	0.0229288	0	0.00794707	-0.00171356	0.0196863	0.0215183	0.000140635	0.00112498	0.00583128	0.670314	3.97827	0.0011217	0.0229561	0.0212702	1.6391
A0A087WTB5	IL6R	Isoform of P08887, Interleukin-6 receptor subunit alpha OS=Homo sapiens OX=9606 GN=IL6R PE=1 SV=1	-0.159571	0.159571	0.397876	0.436079	0.434862	0.597559	0.382463	0.0956804	0.206085	0.483692	0.508152	0.657364	0.285667	0.746462	0.450305	0.655759	NA	NA	NA	NA	NA	NA	NA	NA	0.323631	4.49178	0.0011267	0.0229923	0.316174	1.63842
Q9H7Z6	KAT8	Histone acetyltransferase KAT8 OS=Homo sapiens OX=9606 GN=KAT8 PE=1 SV=2	-0.0175897	0.0175897	0.0228248	0.0829701	-0.0230318	0.0278728	0.114211	-0.0369423	0.0409729	0.0847381	0.0666435	0.0815861	0.111726	0.0994045	0.0703842	0.15666	0	0.111514	0.173238	0.170503	0.103831	0.0789007	0.0858641	0.0706891	0.518259	3.88219	0.00114686	0.023337	0.118528	1.63195
K7ELL7	PRKCSH	Isoform of P14314, Glucosidase 2 subunit beta OS=Homo sapiens OX=9606 GN=PRKCSH PE=1 SV=1	0.00538124	-0.00538124	0.0353285	0.0518025	0.0384266	0.0133731	0.0258612	0.0379991	0.0332243	-0.00560557	0.0416805	0.0289355	0.031755	0.0416627	0.0736254	0.0593951	0	0.00791653	0.0122001	0.0304384	-0.00138422	0.0153445	0.039292	0.0315627	0.482526	4.62405	0.00115112	0.0233569	0.0734295	1.63158
P51688	SGSH	N-sulphoglucosamine sulphohydrolase OS=Homo sapiens OX=9606 GN=SGSH PE=1 SV=1	-0.0102996	0.0102996	0.0620345	0.0309501	-0.0452111	0.0335676	0.138388	0.0436892	0.0380386	0.0481006	0.0537951	0.0637588	0.086367	0.0929679	0.0791759	0.1079	0	-0.0315318	0.096178	0.0313647	-0.0265456	0.0608342	0.118867	0.0402718	0.492132	4.87218	0.00115938	0.0234525	0.128531	1.62981
Q8N9E0	FAM133A	Protein FAM133A OS=Homo sapiens OX=9606 GN=FAM133A PE=1 SV=1	-0.0389282	0.0389282	0.0792341	0.0589391	0.0740614	0.169713	0.036248	0.118123	0.126254	0.267759	0.139196	0.10918	0.114037	0.219591	0.173869	0.0937133	0	-0.0739839	-0.0591271	-0.0831221	-0.00347657	-0.000151074	-0.0339884	0.0869795	0.558463	6.07567	0.00116242	0.0234525	0.169281	1.62981
P80188	LCN2	Neutrophil gelatinase-associated lipocalin OS=Homo sapiens OX=9606 GN=LCN2 PE=1 SV=2	0.0658217	-0.0658217	-0.0346091	-0.0635381	-0.0538423	-0.0328658	-0.0979358	-0.0446152	-0.0111103	-0.119054	-0.0877542	-0.10343	-0.0567904	-0.0901239	-0.161032	-0.138884	0	0.0831487	0.0422536	-0.00233729	-0.0305624	-0.0316282	-0.0292439	-0.0680281	0.49	4.38469	0.0011714	0.0235012	-0.169864	1.62891
Q16540	MRPL23	39S ribosomal protein L23, mitochondrial OS=Homo sapiens OX=9606 GN=MRPL23 PE=1 SV=1	-0.0705876	0.0705876	-0.140244	0.00290058	-0.0499028	-0.0876216	-0.0885148	-0.0749891	-0.220747	-0.0552507	-0.130265	-0.269423	-0.146853	-0.131348	-0.138557	-0.168132	0	0.0224544	0.0792032	0.00157741	-0.064374	0.0446696	-0.127136	-0.0647302	0.513465	5.45432	0.00117341	0.0235012	-0.17334	1.62891
Q6QNY0	BLOC1S3	Biogenesis of lysosome-related organelles complex 1 subunit 3 OS=Homo sapiens OX=9606 GN=BLOC1S3 PE=1 SV=1	0.00534983	-0.00534983	0.0356407	0.0157102	0.0451897	0.000902892	0.0254326	0.0434944	0.0602223	0.0586915	0.0774309	0.0601347	0.0459273	0.00997949	0.0687337	0.0324165	0	-0.00253399	-0.0160574	-0.0394419	-0.0259146	0.0145757	-0.0259963	-0.0564559	0.564894	5.74928	0.00117473	0.0235012	0.0523029	1.62891
O94915	FRYL	Protein furry homolog-like OS=Homo sapiens OX=9606 GN=FRYL PE=1 SV=2	0.0125146	-0.0125146	-0.0196712	-0.0266255	-0.0491271	-0.0356069	-0.0172485	-0.0156562	-0.0303959	-0.0352161	-0.0497695	-0.0373386	-0.092128	-0.0643491	-0.0117509	-0.0588681	0	0.0115691	-0.0055343	0.00178534	-0.00392689	-0.00753912	-0.0167173	-0.0113953	0.504543	6.27691	0.00118012	0.0235428	-0.0781538	1.62814
Q9Y3D9	MRPS23	28S ribosomal protein S23, mitochondrial OS=Homo sapiens OX=9606 GN=MRPS23 PE=1 SV=2	0.00957707	-0.00957707	-0.107446	-0.120243	-0.0906298	-0.129135	-0.206674	-0.128451	-0.0905528	-0.101873	-0.121314	-0.139804	-0.103457	-0.117912	-0.0214112	-0.115591	0	-0.0473916	0.0314007	0.00808202	0.0483893	0.0737375	0.028937	-0.0737992	0.667094	6.3	0.00119829	0.0238274	-0.113932	1.62292
Q9UPY5	SLC7A11	Cystine/glutamate transporter OS=Homo sapiens OX=9606 GN=SLC7A11 PE=1 SV=1	-0.0318862	0.0318862	-0.0021229	0.0261222	-0.0329164	0.0586087	0.0642577	0.111479	0.0150332	0.0428885	-0.0248978	0.0316249	-0.0438835	0.0084129	0.175825	0.211948	0	-0.0657055	-0.0223497	-0.146008	-0.236386	-0.0531617	-0.217305	-0.0719353	0.66698	3.04631	0.00120107	0.0238274	0.177963	1.62292
Q6YN16	HSDL2	Hydroxysteroid dehydrogenase-like protein 2 OS=Homo sapiens OX=9606 GN=HSDL2 PE=1 SV=1	0.0215269	-0.0215269	-0.0197372	-0.0556404	0.0108779	-0.0635128	-0.0494187	-0.065559	-0.0721281	-0.0943018	-0.0475492	-0.11144	-0.102751	-0.119637	-0.0408083	-0.0503056	0	-0.0205471	-0.0345507	-0.0172171	-0.045628	-0.0418835	-0.0294202	-0.0651216	0.562973	5.5218	0.00120728	0.023884	-0.0806662	1.62189
O75506	HSBP1	Heat shock factor-binding protein 1 OS=Homo sapiens OX=9606 GN=HSBP1 PE=1 SV=1	0.0252711	-0.0252711	0.089719	0.0631164	0.044072	0.0409556	0.0341401	-0.0303474	0.0225657	0.0340514	0.139049	0.108166	0.0847145	0.0729235	0.208731	0.11643	0	0.00973413	-0.0701303	-0.0391834	0.0512154	0.0394227	0.0711874	0.213715	0.5874	4.36755	0.00122169	0.0241022	0.0975289	1.61794
Q9NWW6	NMRK1	Nicotinamide riboside kinase 1 OS=Homo sapiens OX=9606 GN=NMRK1 PE=1 SV=1	-0.0294288	0.0294288	0.0147581	-0.0609904	-0.056274	0.0274276	-0.0384794	-0.0527381	-0.0904882	-0.0330974	-0.0602352	-0.104184	-0.0743076	-0.105641	-0.0296625	-0.158647	0	0.0347384	0.0174659	-0.0891894	0.0129579	-0.0315121	-0.0126717	-0.0339549	0.509836	4.83839	0.00125315	0.0246546	-0.0950662	1.6081
P14222	PRF1	Perforin-1 OS=Homo sapiens OX=9606 GN=PRF1 PE=1 SV=1	0.0178791	-0.0178791	-0.0178832	-0.0237679	-0.0147619	-0.0171477	-0.0185204	0.00198077	0.00970933	0.00578202	-0.0162973	-0.0441924	-0.0549275	-0.0333153	-0.0521132	-0.106583	0	-0.038098	0.011743	-0.0634416	-0.0291907	-0.0234532	-0.0297736	-0.0552067	0.664702	3.47238	0.001258	0.0246817	-0.0719544	1.60762
Q69YN2	CWF19L1	CWF19-like protein 1 OS=Homo sapiens OX=9606 GN=CWF19L1 PE=1 SV=2	0.0161101	-0.0161101	-0.0120175	0.00782834	-0.000513114	-0.00157268	-0.0424049	-0.0407862	-0.0234384	-0.0237446	-0.0101495	-0.067958	-0.0271146	-0.0412605	-0.0349061	-0.0493623	0	0.0325038	0.0473206	0.0727162	0.0598164	0.0327224	0.0351242	0.0121619	0.607012	5.33298	0.00127226	0.0248453	-0.0355256	1.60476
P13984	GTF2F2	General transcription factor IIF subunit 2 OS=Homo sapiens OX=9606 GN=GTF2F2 PE=1 SV=2	0.0166697	-0.0166697	0.00906989	0.0494808	0.0410253	0.0508789	0.0136703	0.0312533	0.0310397	0.0265064	0.0374638	0.0215118	0.0434508	0.038102	0.0476488	0.0646446	0	0.0502284	0.0888738	0.0809054	0.0817432	0.0729216	0.037442	0.0499023	0.485924	6.3	0.00127331	0.0248453	0.068367	1.60476
P24941	CDK2	Cyclin-dependent kinase 2 OS=Homo sapiens OX=9606 GN=CDK2 PE=1 SV=2	-0.0158786	0.0158786	-0.00891184	0.0164143	0.0357906	0.0603	-0.0287653	0.0176989	-0.0249738	0.00550939	0.0242591	0.0300349	0.051739	0.0588237	0.0787049	0.126543	0	0.0534446	0.0224812	0.0379405	0.0418956	0.00534005	0.0228101	0.0292023	0.663779	3.47663	0.00128172	0.024941	0.0955428	1.60309
Q6ZVK8	NUDT18	8-oxo-dGDP phosphatase NUDT18 OS=Homo sapiens OX=9606 GN=NUDT18 PE=1 SV=3	0.00428054	-0.00428054	0.00232969	0.0357091	0.00633309	-0.00180415	0.037874	-0.0231548	0.0277609	0.0180737	0.019755	0.0326477	0.018318	-0.0246638	0.0886749	0.0859018	0	0.015878	-0.0118434	-0.0527397	-0.0550747	0.00963416	-0.0024439	-0.0687724	0.663573	3.04618	0.00128705	0.0249545	0.077961	1.60285
A0A096LPC5	WASHC2C	Isoform of Q9Y4E1, WASH complex subunit 2C OS=Homo sapiens OX=9606 GN=WASHC2C PE=1 SV=1	0.020431	-0.020431	0.0170639	0.00323375	0.0114138	0.0192647	-0.00470699	0.0167941	-0.00161156	-0.0153336	0.0454026	0.0415199	0.0248247	0.0463024	0.0639142	0.0581625	0	0.0425665	0.00496898	0.0240767	0.0324758	0.0242033	0.0299069	0.0377754	0.663372	4.10464	0.00129228	0.0249545	0.0444709	1.60285
Q7L273	KCTD9	BTB/POZ domain-containing protein KCTD9 OS=Homo sapiens OX=9606 GN=KCTD9 PE=1 SV=1	-0.25195	0.25195	-0.407495	-0.434688	-0.366796	-0.452911	-0.474735	-0.475797	-0.349463	-0.462699	-0.336162	-0.375678	-0.466556	-0.443625	-0.527006	-0.493433	0	-0.0895587	-0.0167009	-0.0406701	-0.0894926	-0.0651895	0.00571518	-0.101209	0.663265	6.3	0.00129509	0.0249545	-0.435475	1.60285
Q13541	EIF4EBP1	Eukaryotic translation initiation factor 4E-binding protein 1 OS=Homo sapiens OX=9606 GN=EIF4EBP1 PE=1 SV=3	0.00101158	-0.00101158	0.0531464	0.0169139	0.0651222	0.0328233	0.0473565	0.0497644	0.0125824	0.00362662	0.0629007	0.088182	0.0521858	0.0531961	0.0457393	0.0680468	0	-0.0684675	-0.0366473	0.00335773	-0.0281427	-0.00908539	-0.0329201	-0.0812045	0.424344	4.25888	0.00129737	0.0249545	0.0382891	1.60285
Q03169	TNFAIP2	Tumor necrosis factor alpha-induced protein 2 OS=Homo sapiens OX=9606 GN=TNFAIP2 PE=1 SV=2	0.0241056	-0.0241056	-0.0383062	-0.1022	-0.0612433	-0.0545562	-0.118519	-0.149138	-0.104619	-0.0616437	-0.119894	-0.101413	-0.0761291	-0.0952508	-0.0625345	-0.0901484	0	0.0270117	0.0519142	0.117481	0.0626767	0.0396211	0.0795036	0.0156352	0.663079	6.3	0.00129993	0.0249545	-0.101283	1.60285
P17676	CEBPB	CCAAT/enhancer-binding protein beta OS=Homo sapiens OX=9606 GN=CEBPB PE=1 SV=2	-0.0146306	0.0146306	0.0840957	0.0763624	0.0505196	0.101923	0.0437811	-0.000146868	0.0679471	0.0569138	0.0574302	0.0851217	0.0725365	0.136222	0.0923474	0.0773616	0	-0.000346108	-0.0258465	-0.0386081	0.0038836	-0.0672984	-0.0050329	0.049669	0.493379	6.3	0.0013192	0.0252563	0.122441	1.59763
Q9UBN7	HDAC6	Histone deacetylase 6 OS=Homo sapiens OX=9606 GN=HDAC6 PE=1 SV=2	-0.0322054	0.0322054	0.0378049	-0.0023243	0.0117569	0.0175013	0.0211027	-0.0132165	-0.0293751	-0.0070766	-0.0123268	0.00759055	0.0561292	0.0363599	0.0853796	0.0956581	0	0.0339534	0.0122228	0.0301599	0.0787407	-0.0295157	0.0360687	-0.017745	0.662013	3.52256	0.00132813	0.025359	0.0882744	1.59587
Q06265	EXOSC9	Exosome complex component RRP45 OS=Homo sapiens OX=9606 GN=EXOSC9 PE=1 SV=3	0.0136202	-0.0136202	0.0364885	0.0117825	0.0647886	0.0778951	0.00175217	0.0592259	0.0744313	0.034751	0.0685042	0.0606044	0.0547696	0.0439748	0.065531	0.052824	0	-0.0306412	-0.0294245	-0.0167867	-0.017273	6.40221e-05	-0.0320611	-0.0293507	0.624191	5.98786	0.00133281	0.0253803	0.0549221	1.5955
Q8WXG6-4	MADD	Isoform of Q8WXG6, Isoform 4 of MAP kinase-activating death domain protein OS=Homo sapiens OX=9606 GN=MADD PE=1 SV=2	0.004824	-0.004824	0.0754781	0.0987338	0.150166	0.126205	-0.019616	0.0043508	0.0993259	0.141839	0.0738799	0.178102	0.232046	0.143053	0.180001	0.0923777	0	0.00796247	-0.0302807	-0.19533	-0.0878521	-0.126182	-0.0782603	0.00260972	0.454099	4.57104	0.00135264	0.0256894	0.106387	1.59025
Q15369	ELOC	Elongin-C OS=Homo sapiens OX=9606 GN=ELOC PE=1 SV=1	-0.027529	0.027529	0.0621567	0.0718005	0.0714501	0.0703646	0.150239	0.0422486	0.0530795	0.0749094	0.0821264	0.114039	0.106414	0.0984647	0.0628771	0.0825966	0	0.0602596	0.0505298	0.107947	0.063299	0.0594925	0.084551	0.0419733	0.631638	6.3	0.00136153	0.0257293	0.0890789	1.58957
E9PRG8	C11orf98	Uncharacterized protein C11orf98 OS=Homo sapiens OX=9606 GN=C11orf98 PE=4 SV=2	0.028815	-0.028815	0.0128775	-0.0309949	0.0218093	0.0245936	-0.0164278	0.0239028	0.0410683	-0.0128077	0.110723	0.0945076	0.108661	0.0377835	0.0993199	0.0500837	0	-0.0365457	-0.0100621	-0.00765885	0.0462701	-0.032267	0.0575099	0.0957572	0.660758	4.42892	0.00136197	0.0257293	0.0799445	1.58957
Q8N6I1	EID2	EP300-interacting inhibitor of differentiation 2 OS=Homo sapiens OX=9606 GN=EID2 PE=1 SV=3	0.0907321	-0.0907321	0.0305989	0.120897	0.0412687	-0.000813898	-0.013676	0.087228	0.0302479	0.0384552	0.164168	0.119929	0.197312	0.102108	0.194814	0.266586	0	0.0794227	0.1502	0.35002	0.214629	0.127603	0.12769	0.173392	0.593712	3.47578	0.0013695	0.0257336	0.211492	1.5895
Q96QG7	MTMR9	Myotubularin-related protein 9 OS=Homo sapiens OX=9606 GN=MTMR9 PE=1 SV=1	0.0110423	-0.0110423	-0.0264132	-0.0507393	0.00145841	-0.00153521	-0.0819291	-0.0508648	-0.0543431	-0.0438056	-0.00750826	-0.0743447	-0.0719762	-0.0282308	-0.061033	-0.087394	0	0.0453451	-0.0300128	-0.0380604	0.0201879	-0.0555355	-0.0163321	-0.0104494	0.481563	5.93859	0.00138061	0.0257336	-0.0967589	1.5895
O14686	KMT2D	Histone-lysine N-methyltransferase 2D OS=Homo sapiens OX=9606 GN=KMT2D PE=1 SV=2	0.00936497	-0.00936497	0.0462838	0.00978193	0.00369295	0.0193129	0.0357515	-0.000961572	0.0143515	0.0232028	0.0413526	0.0580798	0.0406645	0.0237086	0.0315053	0.0524025	0	0.0045802	0.00972669	0.0417815	0.0094494	0.0314134	0.00901403	-0.000250752	0.470113	4.46724	0.00138216	0.0257336	0.0299004	1.5895
Q86XP3	DDX42	ATP-dependent RNA helicase DDX42 OS=Homo sapiens OX=9606 GN=DDX42 PE=1 SV=1	0.0202422	-0.0202422	-0.043252	-0.0279014	-0.00716386	-0.0457421	-0.072996	-0.0481558	-0.0489066	-0.0521313	-0.074073	-0.0260113	-0.0733757	-0.0202562	-0.0436445	-0.0887586	0	0.0268493	-0.00238912	-0.0133399	0.0134677	0.0130643	0.00155182	-0.00158239	0.522146	6.3	0.00138379	0.0257336	-0.0705084	1.5895
Q96K31	C8orf76	Uncharacterized protein C8orf76 OS=Homo sapiens OX=9606 GN=C8orf76 PE=2 SV=1	-0.0321038	0.0321038	-0.0409695	-0.0266324	-0.0668674	-0.0563463	-0.120706	-0.0186896	-0.289466	-0.22097	-0.113502	-0.0626855	-0.478517	-0.087322	-0.394079	-0.161574	NA	NA	NA	NA	NA	NA	NA	NA	0.50399	4.08598	0.00138622	0.0257336	-0.308212	1.5895
Q9Y3C6	PPIL1	Peptidyl-prolyl cis-trans isomerase-like 1 OS=Homo sapiens OX=9606 GN=PPIL1 PE=1 SV=1	-0.0249653	0.0249653	-0.0193679	-0.0120257	-0.0219917	0.0159205	0.0242609	-0.00968844	0.0210179	0.0493517	0.0034023	0.0249136	0.0382978	0.0539896	0.0751526	0.0796859	0	0.0341617	-0.0303709	-0.0046065	-0.0373418	0.0327004	-0.000353859	0.0414368	0.648187	3.4301	0.00138744	0.0257336	0.0755251	1.5895
P49790	NUP153	Nuclear pore complex protein Nup153 OS=Homo sapiens OX=9606 GN=NUP153 PE=1 SV=2	0.00347354	-0.00347354	0.0600155	0.0402248	0.0442521	0.0316935	0.0275102	0.032343	0.0476798	0.0434535	0.0317638	0.0084648	0.0205454	0.046123	0.0395597	0.0383537	0	-0.00217217	-0.0231567	0.0112199	0.00769629	-0.000112085	-0.0331425	0.0192438	0.659783	6.3	0.00138876	0.0257336	0.0365615	1.5895
A0A087X0W8	RELA	Isoform of Q04206, Transcription factor p65 OS=Homo sapiens OX=9606 GN=RELA PE=1 SV=1	0.00134524	-0.00134524	-0.00865765	-0.0447859	-0.0170917	-0.0223469	-0.0638058	-0.0343264	-0.014878	-0.0125213	-0.0239737	-0.0424069	-0.0614589	-0.0109139	-0.0864669	-0.0545457	0	-0.0151949	-0.0318866	-0.0224237	-0.0155729	-0.0541068	-0.0771082	-0.0577055	0.476067	4.46226	0.0013941	0.0257336	-0.0791693	1.5895
O95831	AIFM1	Apoptosis-inducing factor 1, mitochondrial OS=Homo sapiens OX=9606 GN=AIFM1 PE=1 SV=1	0.0194092	-0.0194092	0.000959008	0.000189637	0.0611518	0.037383	0.0197821	0.0518439	0.0253671	0.0481691	0.0112758	0.0472161	0.0160295	0.0552048	0.0728744	0.11181	0	-0.0740998	-0.0593355	-0.0499607	-0.107431	-0.0766828	-0.0757516	-0.0208175	0.485656	3.52365	0.00139679	0.0257336	0.0789464	1.5895
A0A0D9SGE8	PHF6	Isoform of Q8IWS0, PHD finger protein 6 OS=Homo sapiens OX=9606 GN=PHF6 PE=1 SV=1	0.0387261	-0.0387261	-0.0248105	-0.0277825	-0.0112367	-0.0885408	-0.12205	0.00474624	-0.0295831	-0.0164897	-0.0139374	-0.124954	-0.0799934	-0.0909871	-0.186775	-0.179293	0	-0.0137361	-0.0440982	-0.0237663	-0.0122115	-0.0417213	-0.0798509	-0.121973	0.592078	3.2687	0.00139833	0.0257336	-0.148835	1.5895
P01584	IL1B	Interleukin-1 beta OS=Homo sapiens OX=9606 GN=IL1B PE=1 SV=2	0.00615802	-0.00615802	-0.0289396	0.0311966	-0.0623611	-0.0940672	-0.0579526	-0.110501	-0.0330874	-0.0238839	-0.0442189	-0.076174	-0.0802375	-0.0725981	-0.0762882	-0.0773051	0	0.128385	-0.00156124	0.181079	0.111962	0.0398676	0.0623052	-0.034336	0.243878	4.0277	0.00140444	0.0257795	-0.0449756	1.58873
Q6P1N0	CC2D1A	Coiled-coil and C2 domain-containing protein 1A OS=Homo sapiens OX=9606 GN=CC2D1A PE=1 SV=1	-0.00373873	0.00373873	0.0601207	0.0303067	0.0154569	0.00123032	0.0195649	0.0380587	0.0178744	0.0145845	0.0554136	0.0410789	0.0352519	0.0487226	0.0681256	0.0305517	0	-0.0104522	-0.0126842	-0.0229663	0.00886803	0.00288765	-0.0148559	0.0155822	0.424168	4.29528	0.0014168	0.0258093	0.0301659	1.58822
O15427	SLC16A3	Monocarboxylate transporter 4 OS=Homo sapiens OX=9606 GN=SLC16A3 PE=1 SV=1	-0.0157282	0.0157282	0.0602686	0.0654558	0.0114908	0.0471874	0.00984981	0.0130205	-0.00461235	0.0735668	0.0242925	0.0733055	0.0700802	0.0574314	0.1158	0.108595	0	-0.0252015	-0.0808277	-0.07331	-0.136993	-0.0143751	-0.0735141	0.0398379	0.560996	3.30822	0.00141716	0.0258093	0.086834	1.58822
Q9UKZ1	CNOT11	CCR4-NOT transcription complex subunit 11 OS=Homo sapiens OX=9606 GN=CNOT11 PE=1 SV=1	-0.0691834	0.0691834	-0.0137708	0.0455895	-0.0362954	-0.0559773	0.00901874	-0.0621805	-0.0669792	-0.0685014	-0.0492127	-0.0864519	-0.124395	-0.119164	-0.0705791	-0.174511	0	-0.0541071	-0.0890342	-0.151195	-0.00451881	-0.0427842	-0.0792987	-0.0312328	0.527215	4.19485	0.0014186	0.0258093	-0.132752	1.58822
Q9BVL2	NUP58	Nucleoporin p58/p45 OS=Homo sapiens OX=9606 GN=NUP58 PE=1 SV=1	-0.00571571	0.00571571	0.0374163	0.0367229	0.0226949	0.0463517	0.0392113	0.0380278	0.0126853	0.0143829	0.0632076	0.015187	0.045123	0.0255742	0.053544	0.0948163	0	-0.0390597	-0.048001	-0.0923838	-0.0551747	-0.0548262	-0.0905024	-0.0029237	0.47067	4.52006	0.00142057	0.0258093	0.0807803	1.58822
Q9H3H3	C11orf68	UPF0696 protein C11orf68 OS=Homo sapiens OX=9606 GN=C11orf68 PE=1 SV=3	0.0103055	-0.0103055	-0.0118442	0.0298057	0.000551709	-0.0202681	-0.0203329	0.0120321	-0.000766993	-0.00924541	0.0276336	0.0586578	0.0237805	0.0286442	0.0495882	0.0588387	0	0.102841	0.0602845	0.0217274	-0.00373068	-0.0224795	-0.0257673	0.0636542	0.65833	4.24935	0.00142951	0.025859	0.0429754	1.58739
P07910-2	HNRNPC	Isoform of P07910, Isoform C1 of Heterogeneous nuclear ribonucleoproteins C1/C2 OS=Homo sapiens OX=9606 GN=HNRNPC PE=1 SV=4	0.0321002	-0.0321002	0.00699226	-0.00231467	0.00923788	0.0276083	0.00632388	0.0674076	0.010202	-0.00795494	0.014008	0.0900941	0.0528973	0.122524	0.084468	0.122584	0	0.0567006	0.115267	0.125862	0.119703	0.176585	0.214564	0.0848205	0.60608	3.95135	0.00143056	0.025859	0.0906272	1.58739
O15014	ZNF609	Zinc finger protein 609 OS=Homo sapiens OX=9606 GN=ZNF609 PE=1 SV=2	0.0127144	-0.0127144	0.00566951	0.00115251	-0.000160307	-0.00853616	-0.0288076	0.022345	0.0414191	0.01337	0.0404882	0.0314517	0.0276501	0.0430438	0.0266544	0.0436898	0	-0.042165	-0.0321586	-0.0988164	-0.0264742	-0.00933445	-0.0379554	-0.0186939	0.657658	4.58526	0.0014487	0.0260909	0.0363324	1.58351
P53999	SUB1	Activated RNA polymerase II transcriptional coactivator p15 OS=Homo sapiens OX=9606 GN=SUB1 PE=1 SV=3	0.0310654	-0.0310654	0.0345717	0.00209396	0.0368094	0.0333773	0.0172692	0.0290958	0.0294229	-0.00279783	0.0218067	0.010422	0.0712974	0.0611192	0.131414	0.0750565	0	0.0444679	0.0137626	-0.0105208	0.0269217	0.0545978	0.0349292	0.157407	0.657588	3.55488	0.00145072	0.0260909	0.0882461	1.58351
H3BN34	PKM	Isoform of P14618, Pyruvate kinase PKM (Fragment) OS=Homo sapiens OX=9606 GN=PKM PE=1 SV=8	-0.0165323	0.0165323	-0.0122939	0.0272497	0.0875711	-0.0191414	0.13893	0.138207	0.0434099	0.0384133	0.109512	0.195586	-0.00567141	0.130385	0.220792	0.152717	NA	NA	NA	NA	NA	NA	NA	NA	0.359197	4.37785	0.00145475	0.0260976	0.0978823	1.5834
A0A5F9ZHB6	PRIM1	Isoform of P49642, DNA primase OS=Homo sapiens OX=9606 GN=PRIM1 PE=1 SV=1	0.0624618	-0.0624618	-0.147525	-0.167525	-0.0415022	-0.153309	-0.397677	-0.239847	-0.264602	-0.103031	-0.351398	-0.219169	-0.267331	-0.121677	-0.264646	-0.216098	0	0.0154668	-0.0329088	-0.129043	0.00883673	-0.0116988	-0.0438426	0.029175	0.572641	6.11837	0.00145895	0.0261072	-0.261444	1.58324
O94919	ENDOD1	Endonuclease domain-containing 1 protein OS=Homo sapiens OX=9606 GN=ENDOD1 PE=1 SV=2	-0.0252561	0.0252561	0.00758413	0.0160614	-0.00873507	0.0472137	0.0444134	0.0766072	0.0671935	0.00852892	0.0647922	0.0415328	0.036539	0.0350803	0.0900193	0.0627591	0	0.0844469	0.0260192	0.0465746	0.0208728	0.0409141	-0.003482	-0.0179684	0.477732	5.52296	0.00147553	0.026258	0.0967139	1.58074
Q9UKT9	IKZF3	Zinc finger protein Aiolos OS=Homo sapiens OX=9606 GN=IKZF3 PE=1 SV=2	0.0372599	-0.0372599	-0.00593056	-0.020595	-0.0258551	-0.0426915	-0.000908749	-0.0154821	-0.05409	0.00034397	-0.0843104	-0.104545	-0.0883048	-0.0422312	-0.121992	-0.0495942	0	0.0404095	0.0264644	-0.0220129	0.00339255	0.0212891	-0.0268333	0.0312315	0.579087	4.46035	0.00147629	0.026258	-0.0706857	1.58074
A8MVS5	HIDE1	Protein HIDE1 OS=Homo sapiens OX=9606 GN=HIDE1 PE=1 SV=2	-0.0284359	0.0284359	0.0801512	0.224772	0.100193	-0.149983	-0.0518201	-0.0696537	-0.0792327	0.050963	0.229746	0.257736	0.246186	0.164018	0.299853	0.295449	0	0.0265636	0.0560666	0.0627018	-0.0050391	0.0440847	0.104514	0.0731533	0.656631	4.16619	0.00147844	0.026258	0.242877	1.58074
Q71UI9	H2AZ2	Histone H2A.V OS=Homo sapiens OX=9606 GN=H2AZ2 PE=1 SV=3	0.0328506	-0.0328506	-0.0740203	0.00699502	0.000257666	0.0226458	0.036883	-0.0347307	-0.0920204	0.0276178	-0.102371	-0.0314126	-0.0565586	-0.0844661	-0.172151	-0.175064	0	0.0824725	0.167848	-0.0910257	-0.0497359	0.0656533	0.0421204	0.10284	0.656412	3.30857	0.00148486	0.0263063	-0.155279	1.57994
Q9UL03	INTS6	Integrator complex subunit 6 OS=Homo sapiens OX=9606 GN=INTS6 PE=1 SV=1	-0.0331097	0.0331097	0.0215245	-0.0197964	-0.0187614	-0.0219529	-0.100194	0.0207518	0.000632224	0.00516704	-0.0468891	-0.134686	-0.080965	-0.0634746	-0.136171	-0.163193	0	-0.146329	-0.145788	-0.150481	-0.0444065	-0.0546737	-0.111283	-0.0828257	0.585218	4.06972	0.00149951	0.0265	-0.101572	1.57675
Q9Y259	CHKB	Choline/ethanolamine kinase OS=Homo sapiens OX=9606 GN=CHKB PE=1 SV=3	-0.00530945	0.00530945	0.0340984	0.0189668	0.0420082	0.0124046	0.0243948	0.0172404	0.00951202	0.00527704	0.0422858	0.0413094	0.0180779	0.0204914	0.0716256	0.0501523	0	0.0262811	-0.0119029	0.0264187	0.0473196	0.0036321	0.00584519	0.0406451	0.403935	4.22247	0.00150387	0.0265113	0.0271008	1.57657
Q8NCN2	ZBTB34	Zinc finger and BTB domain-containing protein 34 OS=Homo sapiens OX=9606 GN=ZBTB34 PE=1 SV=4	-0.00777388	0.00777388	0.08566	0.0312064	0.0584168	0.0357487	0.0816223	0.0535379	-0.035075	0.0355394	0.0226572	0.0989166	0.106681	0.0924109	0.108	0.118079	0	0.0951022	0.0972706	0.0877626	0.143732	-0.012597	0.226822	0.0165514	0.496746	3.98032	0.0015241	0.0268017	0.0774169	1.57184
P17900	GM2A	Ganglioside GM2 activator OS=Homo sapiens OX=9606 GN=GM2A PE=1 SV=4	0.0240453	-0.0240453	0.0516924	-0.0311395	0.0611823	0.0344904	0.091073	0.0370766	-0.0348692	0.0429145	0.0723832	0.192618	0.0574133	0.0738269	0.193077	0.285832	0	-0.00673534	0.0553281	0.161518	0.0435533	0.0437818	0.133544	0.156982	0.51074	4.08134	0.00153157	0.0268128	0.133345	1.57166
P62314	SNRPD1	Small nuclear ribonucleoprotein Sm D1 OS=Homo sapiens OX=9606 GN=SNRPD1 PE=1 SV=1	-0.0415439	0.0415439	0.0228187	0.0479639	0.0864151	0.0412665	0.110704	0.0652602	0.055725	0.0610457	0.0474881	0.0625733	0.0755793	0.0752112	0.0637732	0.108693	0	0.128005	0.138222	0.27788	0.17369	0.211125	0.18625	0.131975	0.562435	5.98821	0.00153227	0.0268128	0.0723281	1.57166
Q9UDY4	DNAJB4	DnaJ homolog subfamily B member 4 OS=Homo sapiens OX=9606 GN=DNAJB4 PE=1 SV=1	-0.0325542	0.0325542	0.0958699	0.0589062	0.000440948	0.0906107	0.0388052	0.0814384	0.0838606	0.120236	0.0890195	0.151974	0.035961	0.180435	0.123975	0.0770427	0	0.0327426	0.100735	0.0404848	0.103683	0.116371	0.0253618	0.0748509	0.499073	6.3	0.00157039	0.0274125	0.155819	1.56205
O95479	H6PD	GDH/6PGL endoplasmic bifunctional protein OS=Homo sapiens OX=9606 GN=H6PD PE=1 SV=2	0.0121761	-0.0121761	-0.000294875	-0.0105914	-0.052045	-0.0555402	-0.00238461	-0.00037865	-0.0323094	-0.00706446	-0.0577902	-0.0609796	-0.077773	-0.0730225	-0.0452023	-0.0343152	0	0.0187099	0.0612492	0.0695807	0.0210381	0.0082669	-0.00604804	0.0133001	0.547842	4.44152	0.00157753	0.0274582	-0.0460592	1.56133
Q9UPR0	PLCL2	Inactive phospholipase C-like protein 2 OS=Homo sapiens OX=9606 GN=PLCL2 PE=1 SV=2	-0.0263149	0.0263149	0.0249487	0.0157732	0.0396959	0.0390067	0.0212469	-0.0175747	0.0232291	-0.00346119	0.0125194	0.00565696	-0.0372139	-0.0656424	-0.0481468	-0.0603819	0	0.0803959	0.0704995	0.0611356	0.0533648	-0.00460976	0.042222	0.0248809	0.653176	3.76114	0.00158232	0.0274582	-0.0661736	1.56133
Q9BV68	RNF126	E3 ubiquitin-protein ligase RNF126 OS=Homo sapiens OX=9606 GN=RNF126 PE=1 SV=2	0.0184491	-0.0184491	0.0526895	0.0200129	0.0215784	0.0813069	0.0287932	0.0342339	0.0977995	0.0317804	0.0583778	0.078371	0.0752077	0.0599107	0.0293621	0.0796145	0	0.000238778	-0.00551057	-0.0369862	-0.00644501	0.00501654	-0.0122813	-0.030523	0.530992	6.3	0.00158457	0.0274582	0.0787296	1.56133
Q00653-4	NFKB2	Isoform of Q00653, Isoform 4 of Nuclear factor NF-kappa-B p100 subunit OS=Homo sapiens OX=9606 GN=NFKB2 PE=1 SV=4	0.00587755	-0.00587755	0.00372832	0.0143952	-0.0426905	-0.0440051	-0.037543	-0.0460528	-0.00844558	0.00115382	-0.00394396	-0.0633601	-0.047051	-0.0392189	-0.0801449	-0.055226	0	0.0458947	0.00275872	0.0149717	0.0161497	-0.00533445	0.00793653	-0.00480081	0.482248	3.69557	0.00159045	0.0274931	-0.0638742	1.56078
P09493-6	TPM1	Isoform of P09493, Isoform 6 of Tropomyosin alpha-1 chain OS=Homo sapiens OX=9606 GN=TPM1 PE=1 SV=2	0.0372092	-0.0372092	0.0678862	0.0325166	0.0253446	0.0144445	0.0609097	0.0582008	0.0104006	0.0501925	0.0737833	0.0497252	0.0580672	0.0334102	0.0910453	0.123271	0	0.0766093	-0.0132195	-0.0193353	0.0497353	0.0587742	0.0341551	0.0742455	0.469252	4.15553	0.00159837	0.0275632	0.110412	1.55967
Q8N163	CCAR2	Cell cycle and apoptosis regulator protein 2 OS=Homo sapiens OX=9606 GN=CCAR2 PE=1 SV=2	0.0205538	-0.0205538	-0.00821327	-0.0205224	-0.00931764	-0.00106555	-0.0129374	-0.0295558	-0.0159427	-0.047087	-0.0224655	-0.0420148	-0.0256555	-0.017171	-0.0509021	-0.037075	0	-0.0322159	-0.0491637	-0.0210221	-0.0534513	-0.0391546	-0.0547196	-0.0259378	0.47262	4.65352	0.00163105	0.0280588	-0.0560796	1.55193
Q9UBP8	KAAG1	Kidney-associated antigen 1 OS=Homo sapiens OX=9606 GN=KAAG1 PE=2 SV=1	-0.0107972	0.0107972	-0.0708312	-0.0717389	-0.0919187	-0.0499358	-0.114644	-0.113149	-0.106745	-0.116623	-0.0204585	-0.042428	-0.0824323	-0.0678359	-0.12587	-0.249326	0	-0.252996	-0.24195	-0.351803	-0.183002	-0.180578	-0.14867	-0.356446	0.461341	6.3	0.00164307	0.0281644	-0.186464	1.5503
Q13888	GTF2H2	General transcription factor IIH subunit 2 OS=Homo sapiens OX=9606 GN=GTF2H2 PE=1 SV=1	0.0295273	-0.0295273	-0.0393005	-0.0469982	-0.0564966	-0.0182342	-0.0714911	-0.0358987	-0.0500213	-0.0302865	-0.039236	-0.0449525	-0.0181286	-0.159241	-0.131538	-0.0936789	0	-0.0800536	-0.100603	-0.134591	-0.0723941	-0.0898405	-0.0324202	-0.0749781	0.473397	3.76136	0.0016451	0.0281644	-0.104164	1.5503
Q8WXH0	SYNE2	Nesprin-2 OS=Homo sapiens OX=9606 GN=SYNE2 PE=1 SV=3	-0.014436	0.014436	-0.0253712	0.00330478	-0.0186167	0.0169477	-0.0169643	0.0121836	-0.00896341	0.0152124	-0.0468128	-0.0206578	-0.0302178	-0.0109452	-0.067547	-0.0865767	0	-0.0439486	-0.0308437	-0.0309635	-0.0439248	-0.0202001	-0.061287	-0.024073	0.650843	3.23463	0.00165589	0.0282638	-0.0682337	1.54877
Q14247	CTTN	Src substrate cortactin OS=Homo sapiens OX=9606 GN=CTTN PE=1 SV=2	-0.00101791	0.00101791	0.0442445	0.0314923	0.0284129	0.0687098	0.0644941	0.0518221	0.0418713	0.0183618	0.0592981	0.043086	0.0703662	0.0580524	0.0222464	0.0391696	0	0.028167	0.0209	0.0124403	-0.00631416	0.00161409	0.024787	0.0445651	0.650752	6.07026	0.00165884	0.0282638	0.0471577	1.54877
P39748	FEN1	Flap endonuclease 1 OS=Homo sapiens OX=9606 GN=FEN1 PE=1 SV=1	0.00617426	-0.00617426	0.0121284	-0.0139178	-0.0294192	-0.0392283	-0.0345087	-0.0139723	-0.0512016	-0.0570313	-0.0427223	-0.0245569	-0.0542793	-0.0205198	-0.0361931	-0.0215623	0	0.020709	-0.00368497	0.0269983	0.00710795	-0.0387301	0.0159374	0.0754684	0.650272	5.74739	0.00167435	0.0284429	-0.0356625	1.54603
P36405	ARL3	ADP-ribosylation factor-like protein 3 OS=Homo sapiens OX=9606 GN=ARL3 PE=1 SV=2	0.0181826	-0.0181826	0.043794	0.00888106	0.0285511	0.0263913	0.0481367	0.0863875	0.0147392	-0.0370156	0.0880041	0.0178749	0.120208	0.0742741	0.134642	0.087228	0	0.00894353	-0.0267434	-0.027084	-0.0259676	-0.0557867	-0.0598594	-0.0299014	0.568334	3.97666	0.00168123	0.0284429	0.0857913	1.54603
E7EUN9	DUS2	Isoform of Q9NX74, tRNA-dihydrouridine(20) synthase [NAD(P)+]-like OS=Homo sapiens OX=9606 GN=DUS2 PE=1 SV=1	0.0857223	-0.0857223	0.10641	0.126377	0.112876	0.155361	0.0954734	0.130419	0.114345	0.0434531	0.130106	0.0615755	0.1327	0.125029	0.232573	0.266904	0	0.0487279	0.0270373	0.135715	0.0863674	0.0780517	0.169224	0.0932434	0.459809	4.51418	0.00168134	0.0284429	0.271267	1.54603
Q9P258	RCC2	Protein RCC2 OS=Homo sapiens OX=9606 GN=RCC2 PE=1 SV=2	0.0100915	-0.0100915	0.003921	-0.00570107	0.0146808	-0.00430511	0.00144334	-0.021045	-0.0313289	-0.0434852	-0.0114924	-0.0508049	-0.0175991	-0.0264931	-0.0247857	-0.0680785	0	0.0346615	0.0258846	0.0263272	0.013288	0.0227117	0.0175699	-0.000612528	0.599543	4.95949	0.00171907	0.0290124	-0.0353344	1.53742
Q6RFH5	WDR74	WD repeat-containing protein 74 OS=Homo sapiens OX=9606 GN=WDR74 PE=1 SV=1	-0.0315648	0.0315648	0.069124	0.0117537	0.00486094	0.0471044	0.0959547	0.0439038	0.029164	0.0962076	0.0734922	0.0847157	0.0220484	0.0644434	0.108648	0.0819979	NA	NA	NA	NA	NA	NA	NA	NA	0.479194	6.3	0.00173023	0.0291317	0.113943	1.53563
Q14254	FLOT2	Flotillin-2 OS=Homo sapiens OX=9606 GN=FLOT2 PE=1 SV=2	0.0132413	-0.0132413	-0.0131091	0.000605503	-0.0227182	-0.022272	-0.0203385	0.00798977	0.00896273	0.0129722	-0.0262288	0.0136943	-0.0112709	-0.0425673	-0.0500666	-0.101574	0	-0.0866042	-0.0517136	-0.0977391	-0.0261548	-0.0482654	-0.0314536	-0.0374567	0.648247	3.39843	0.00174115	0.0292463	-0.0716835	1.53393
P55795	HNRNPH2	Heterogeneous nuclear ribonucleoprotein H2 OS=Homo sapiens OX=9606 GN=HNRNPH2 PE=1 SV=1	-0.0205854	0.0205854	-0.023322	0.0167331	-0.0413617	-0.00862915	-0.0469791	-0.0412092	-0.0502486	0.0116357	-0.0479846	-0.059023	0.00341538	-0.0620159	-0.107763	-0.10118	0	-0.00876864	-0.00399542	0.038011	-0.0172733	0.00296195	0.0205324	0.000756807	0.511686	3.2454	0.00174548	0.0292502	-0.0791785	1.53387
A2RUR9	CCDC144A	Coiled-coil domain-containing protein 144A OS=Homo sapiens OX=9606 GN=CCDC144A PE=2 SV=1	0.00934897	-0.00934897	0.118094	0.12156	0.140509	0.10586	0.0416181	0.139823	0.129261	0.0797684	0.155604	0.104384	0.0197144	0.116481	0.0962248	0.0992921	NA	NA	NA	NA	NA	NA	NA	NA	0.647684	6.3	0.00176015	0.0293697	0.104884	1.5321
Q8TC12	RDH11	Retinol dehydrogenase 11 OS=Homo sapiens OX=9606 GN=RDH11 PE=1 SV=2	0.0453385	-0.0453385	-0.196472	-0.127671	0.00479504	0.0438872	-0.103773	-0.104399	-0.0263642	-0.0645674	-0.205872	-0.0689516	-0.238841	-0.119739	-0.239018	-0.239082	0	-0.0166799	0.094102	0.0268372	0.0847461	-0.142109	-0.032582	-0.0431858	0.518422	3.47266	0.00176244	0.0293697	-0.203971	1.5321
P54577	YARS1	Tyrosine--tRNA ligase, cytoplasmic OS=Homo sapiens OX=9606 GN=YARS1 PE=1 SV=4	0.0342592	-0.0342592	-0.0330265	-0.0413544	-0.0242919	-0.0314701	-0.0656197	-0.0319738	-0.0302404	-0.0565078	-0.0343772	-0.0905612	-0.0398137	-0.0771495	-0.0475796	-0.0686606	0	-0.0178818	-0.0129106	-0.0479097	-0.0250087	-0.0349479	-0.0510365	-0.0275582	0.492359	6.3	0.00176499	0.0293697	-0.0816898	1.5321
A4D1P6	WDR91	WD repeat-containing protein 91 OS=Homo sapiens OX=9606 GN=WDR91 PE=1 SV=2	-0.00242767	0.00242767	-0.0436093	-0.0367044	-0.0119659	-0.0126446	-0.0523104	-0.0297728	-0.000642453	-0.0406302	-0.0285805	-0.0743903	-0.05585	-0.0283713	-0.0317461	-0.0746636	0	-0.0128783	-0.0260309	0.000415665	-0.0475201	-0.039097	-0.11558	-0.0459866	0.466845	6.24452	0.00176925	0.0293721	-0.0742833	1.53207
P31930	UQCRC1	Cytochrome b-c1 complex subunit 1, mitochondrial OS=Homo sapiens OX=9606 GN=UQCRC1 PE=1 SV=3	0.00819832	-0.00819832	-0.124528	-0.0899069	-0.0305342	-0.0187508	0.0200346	-0.00669151	-0.0473564	-0.08405	-0.107507	-0.0321666	-0.263598	-0.0852095	-0.193894	-0.183714	0	0.0602684	0.138832	0.00617369	-0.0173361	-0.0235535	0.0507017	0.142481	0.621158	3.83112	0.00178253	0.0295236	-0.161342	1.52983
Q9NXR8	ING3	Inhibitor of growth protein 3 OS=Homo sapiens OX=9606 GN=ING3 PE=1 SV=2	-0.00280079	0.00280079	0.126893	0.1475	0.164821	0.083733	0.234415	0.0890951	0.0717922	0.24206	0.0857229	0.0996668	0.125079	0.219437	0.157058	0.191033	0	-0.0119416	-0.0325109	-0.047388	-0.0607985	0.019581	-0.0301106	0.00378363	0.600488	6.3	0.00179548	0.0296626	0.147245	1.52779
Q9NTX5	ECHDC1	Ethylmalonyl-CoA decarboxylase OS=Homo sapiens OX=9606 GN=ECHDC1 PE=1 SV=2	0.0115151	-0.0115151	0.0468091	0.0119065	0.0212507	0.0031251	0.0103079	-0.0119551	0.00203072	0.0066106	0.0496966	0.0316582	0.0216427	0.0237672	0.0781083	0.0867014	0	0.0461033	0.0157947	0.0278779	0.0202345	-0.0045388	0.00906277	0.0479398	0.646539	3.21022	0.00179925	0.0296626	0.0674788	1.52779
Q9UNK0	STX8	Syntaxin-8 OS=Homo sapiens OX=9606 GN=STX8 PE=1 SV=2	-0.0319103	0.0319103	-0.00866908	0.10207	0.0159374	0.175584	0.060986	0.104135	0.0731112	0.112871	0.105254	0.0925118	0.148336	0.0570428	0.102867	0.14266	0	-0.00330465	-0.0287786	0.0447839	0.0596351	-0.0160695	-0.157013	-0.0526588	0.496731	6.3	0.00180538	0.0296746	0.13839	1.52761
O14974-4	PPP1R12A	Isoform of O14974, Isoform 4 of Protein phosphatase 1 regulatory subunit 12A OS=Homo sapiens OX=9606 GN=PPP1R12A PE=1 SV=1	-0.0054601	0.0054601	0.0358431	0.0246142	0.034915	0.0259125	0.0178363	0.0321202	0.0175595	0.0166305	0.0189262	0.0250869	0.0216055	0.0404594	0.0536872	0.0240595	0	0.00458855	0.0217538	0.00299526	0.0189553	0.0144905	-0.00312452	0.0287551	0.605675	6.3	0.00180831	0.0296746	0.0278099	1.52761
Q16566	CAMK4	Calcium/calmodulin-dependent protein kinase type IV OS=Homo sapiens OX=9606 GN=CAMK4 PE=1 SV=1	-0.000639326	0.000639326	-0.00771522	0.0140663	-0.0011215	0.0141496	0.00757606	0.00131585	0.0182935	0.0061135	-0.000112489	-0.0401429	0.0173022	0.0290069	0.0710814	0.0393559	0	0.0412695	-0.00397592	-0.0713706	-0.0329291	-0.0338492	0.00369198	0.00379004	0.645995	3.50463	0.00181811	0.0297144	0.0543319	1.52703
Q9NUW8	TDP1	Tyrosyl-DNA phosphodiesterase 1 OS=Homo sapiens OX=9606 GN=TDP1 PE=1 SV=2	0.00904047	-0.00904047	-0.0165944	-0.0334539	-0.0464598	-0.0269706	-0.0135662	-0.037503	-0.0046539	-0.0565175	-0.0148044	-0.0477917	-0.0101198	-0.0904485	-0.0712689	-0.0624842	0	0.0241561	0.040866	0.00234534	0.00794219	-0.0115634	0.0200335	0.0219009	0.459323	4.80041	0.00181908	0.0297144	-0.0844285	1.52703
P0DPK5	H3Y2	Histone H3.X OS=Homo sapiens OX=9606 GN=H3Y2 PE=5 SV=1	-0.153256	0.153256	-0.474595	-0.00793451	0.0264822	0.141998	-0.0168369	-0.324542	-0.31982	-0.0609565	-0.51503	-0.252751	-0.813451	-0.335216	-0.4454	-0.583899	0	0.397224	0.574147	-0.0823288	0.0201455	0.279705	0.258846	0.571372	0.547842	4.26262	0.00185047	0.0301193	-0.50343	1.52115
Q9H875	PRKRIP1	PRKR-interacting protein 1 OS=Homo sapiens OX=9606 GN=PRKRIP1 PE=1 SV=1	0.00648788	-0.00648788	0.0745748	0.0482234	0.0236757	0.00969302	0.0813764	0.010019	0.0420772	0.0147807	0.0784786	0.0224025	0.0773025	0.057207	0.0755119	0.0666381	0	0.0496186	0.052192	0.0544397	0.00795279	0.0266848	0.0120974	0.0419086	0.457015	5.29816	0.00185233	0.0301193	0.0997881	1.52115
P21912	SDHB	Succinate dehydrogenase [ubiquinone] iron-sulfur subunit, mitochondrial OS=Homo sapiens OX=9606 GN=SDHB PE=1 SV=3	-0.0214644	0.0214644	-0.00605308	-0.016709	-0.0129992	-0.0446031	0.0593272	0.0203493	0.0639836	-0.0402598	-0.0560726	-0.0702804	-0.0470976	-0.0994817	-0.116541	-0.120242	0	0.0268094	-0.0098361	-0.0195516	-0.116032	-0.023693	0.00755006	-0.0143835	0.64451	4.04766	0.00187038	0.0303436	-0.0978341	1.51793
Q9BYD1	MRPL13	39S ribosomal protein L13, mitochondrial OS=Homo sapiens OX=9606 GN=MRPL13 PE=1 SV=1	0.0306463	-0.0306463	0.0188079	-0.0120751	0.00359459	-0.0479296	-0.0407231	-0.116106	-0.0797664	0.00883631	-0.186195	-0.176612	-0.250824	-0.102358	-0.0580725	-0.113322	0	0.121028	0.116439	0.12038	0.08069	0.161698	0.124367	-0.0132063	0.555245	4.73208	0.00187674	0.0303776	-0.141166	1.51745
O75439	PMPCB	Mitochondrial-processing peptidase subunit beta OS=Homo sapiens OX=9606 GN=PMPCB PE=1 SV=2	-0.0224456	0.0224456	-0.0261734	-0.0329123	0.00173169	-0.0291971	0.0193361	-0.066818	-0.0584973	-0.0483968	-0.040252	-0.0146632	-0.0951771	-0.0713916	-0.056692	-0.0592936	0	-0.0202651	0.00678385	0.0431454	-0.028854	0.00829964	0.00611743	-0.0900092	0.466892	4.48646	0.00188488	0.0304055	-0.0759832	1.51705
Q9UNQ2	DIMT1	Probable dimethyladenosine transferase OS=Homo sapiens OX=9606 GN=DIMT1 PE=1 SV=1	-0.00491681	0.00491681	0.0914694	0.122702	0.0645964	0.0749663	0.119629	0.079502	0.0292073	0.0687101	0.0648167	0.0751679	0.0483329	0.0780675	0.104835	0.0396847	0	0.0106235	0.00627144	-0.0194216	-0.00380492	0.0635714	0.0134574	0.0157239	0.644046	6.3	0.001887	0.0304055	0.0758116	1.51705
Q56VL3	OCIAD2	OCIA domain-containing protein 2 OS=Homo sapiens OX=9606 GN=OCIAD2 PE=1 SV=1	-0.0577803	0.0577803	-0.0350543	-0.0496739	-0.0288493	0.0893043	0.0628537	-0.0176854	-0.116432	-0.0211796	-0.13978	-0.0257604	-0.253488	-0.123025	-0.253618	-0.151163	NA	NA	NA	NA	NA	NA	NA	NA	0.643872	3.96314	0.00189324	0.0304371	-0.20807	1.5166
Q15276	RABEP1	Rab GTPase-binding effector protein 1 OS=Homo sapiens OX=9606 GN=RABEP1 PE=1 SV=2	0.0146595	-0.0146595	0.00663569	-0.00430969	0.0267807	0.00449233	-0.00230382	0.0314093	0.0587258	0.000375199	0.0489458	0.0314	0.0490799	0.0254163	0.027003	0.0442662	0	0.0356145	0.031754	0.0653026	0.0435409	0.0447182	0.0602348	0.0197985	0.502141	5.02155	0.00190292	0.0305238	0.0386515	1.51536
Q9C0G6	DNAH6	Dynein heavy chain 6, axonemal OS=Homo sapiens OX=9606 GN=DNAH6 PE=2 SV=3	-0.00957739	0.00957739	0.0818148	-0.104918	-0.19406	0.0551414	-0.015584	0.0216251	0.121297	0.189886	0.0710812	0.133352	0.158071	0.135824	0.217495	0.233109	NA	NA	NA	NA	NA	NA	NA	NA	0.637076	4.85984	0.00192292	0.0307753	0.178209	1.5118
P08133	ANXA6	Annexin A6 OS=Homo sapiens OX=9606 GN=ANXA6 PE=1 SV=3	-0.0515843	0.0515843	-0.135286	-0.0304706	-0.00220566	0.00289016	-0.0203788	-0.0475605	-0.0569243	0.0123662	-0.100974	-0.0920954	-0.167933	-0.0779182	-0.145613	-0.219297	0	0.118444	0.253073	-0.126608	0.0522612	0.0517373	0.0951278	0.223275	0.595736	3.65876	0.00193363	0.0308775	-0.160746	1.51036
F5H8H3	STARD10	Isoform of Q9Y365, START domain-containing protein 10 OS=Homo sapiens OX=9606 GN=STARD10 PE=1 SV=1	0.0250851	-0.0250851	-0.0953034	0.000725662	-0.0131586	-0.0336069	0.0532254	0.00209062	-0.0186887	-0.0026735	-0.00905167	0.0406468	0.0650915	0.0690451	0.0964154	0.120694	0	0.0275139	-0.00412999	-0.0362402	0.0202219	0.0306038	-0.029549	0.0699892	0.642561	3.5763	0.00194096	0.0309251	0.119879	1.50969
Q10570	CPSF1	Cleavage and polyadenylation specificity factor subunit 1 OS=Homo sapiens OX=9606 GN=CPSF1 PE=1 SV=2	0.0338275	-0.0338275	-0.0640255	-0.00959379	-0.0492128	-0.0349042	-0.0689634	-0.0443609	-0.038903	-0.0526235	-0.0367908	-0.0765861	-0.0499807	-0.0655637	-0.0463592	-0.0763078	0	-0.0323824	-0.0495311	-0.0349889	-0.0449504	-0.024199	-0.0670089	-0.0266698	0.519025	6.3	0.00195401	0.0310635	-0.0663519	1.50775
P18124	RPL7	60S ribosomal protein L7 OS=Homo sapiens OX=9606 GN=RPL7 PE=1 SV=1	0.107708	-0.107708	0.123171	0.189529	0.172605	0.223616	0.24415	0.232947	0.153075	0.245623	0.152711	0.267519	0.191593	0.230085	0.12614	0.223853	0	0.0575124	0.0243297	0.0336573	0.0876054	0.0750856	0.0142742	-0.0169765	0.641825	6.20221	0.00196819	0.0312193	0.206542	1.50558
P17812	CTPS1	CTP synthase 1 OS=Homo sapiens OX=9606 GN=CTPS1 PE=1 SV=2	0.0309205	-0.0309205	-0.0014603	-0.00873953	-0.041217	-0.019835	-0.0463468	-0.0175403	-0.0224922	-0.0425256	-0.0391142	-0.0614552	-0.0212237	-0.0619126	-0.0633873	-0.0351775	0	0.0505069	0.0621742	0.0833375	0.0354141	0.00770275	0.0556595	0.026566	0.475426	5.5073	0.00198494	0.031415	-0.049443	1.50286
P34910	EVI2B	Protein EVI2B OS=Homo sapiens OX=9606 GN=EVI2B PE=1 SV=2	0.00409765	-0.00409765	-0.00710503	-0.0347625	0.0120979	0.00917448	-0.0621039	0.00884908	-0.0381583	0.0466145	0.038698	0.0274596	0.0522185	0.0256069	0.0799317	0.104315	0	-0.0984269	-0.0053666	-0.0281764	0.00548861	-0.0425024	-0.0173698	-0.0220592	0.641198	3.34368	0.00199163	0.0314509	0.095233	1.50237
Q86Y82	STX12	Syntaxin-12 OS=Homo sapiens OX=9606 GN=STX12 PE=1 SV=1	-0.013404	0.013404	-0.00144107	0.000997137	-0.0335674	0.00653241	0.0178924	0.0218675	0.0087705	0.0112825	-0.00219225	0.0337625	0.0462277	0.0328076	0.0403556	0.0485049	0	0.0066876	-0.0306053	0.093937	0.0279591	0.0401115	0.00624646	0.0511995	0.594564	3.73155	0.00201902	0.031813	0.0477963	1.4974
K7ERY2	YIF1B	Isoform of Q5BJH7, Protein YIF1B (Fragment) OS=Homo sapiens OX=9606 GN=YIF1B PE=1 SV=1	-0.0449373	0.0449373	0.0360763	0.00437726	0.0117589	0.0243126	0.034267	0.0895922	0.0303069	0.08232	0.0578828	0.0975632	0.0958346	0.0775567	0.0524317	0.056483	0	-0.0661432	-0.0511475	0.0212579	-0.049697	-0.0680972	-0.0187313	0.0320559	0.515331	5.33994	0.00203768	0.0320361	0.0699999	1.49436
Q07352	ZFP36L1	mRNA decay activator protein ZFP36L1 OS=Homo sapiens OX=9606 GN=ZFP36L1 PE=1 SV=1	0.0354882	-0.0354882	0.0287773	0.0469556	0.0202032	0.0686336	0.0936732	0.0323817	0.0857086	0.103735	0.0928688	0.0290109	0.0457699	0.0446085	0.075698	0.142019	0	0.033067	-0.00502158	0.0840321	0.0829457	0.0116012	0.0447495	0.0236722	0.473288	6.3	0.00206207	0.0322316	0.109396	1.49172
Q9UDY2	TJP2	Tight junction protein ZO-2 OS=Homo sapiens OX=9606 GN=TJP2 PE=1 SV=2	0.13135	-0.13135	0.0491741	-0.0853071	-0.232638	-0.177543	-0.205463	-0.0873715	-0.0941612	-0.190346	-0.162343	-0.0601488	-0.395991	-0.227196	-0.261954	-0.234814	0	0.118671	-0.00558608	0.188914	0.239	0.0624661	0.324668	0.0298349	0.455069	5.24297	0.00206737	0.0322316	-0.391673	1.49172
Q13188	STK3	Serine/threonine-protein kinase 3 OS=Homo sapiens OX=9606 GN=STK3 PE=1 SV=2	0.0111438	-0.0111438	0.00904127	0.0299521	0.040459	0.0681867	0.000460564	0.0182554	0.030264	0.078892	0.0155894	0.0465552	0.0470405	0.0315179	0.121005	0.0650699	0	-0.00081356	0.00672163	0.0754793	0.0586007	0.0149371	0.000299434	0.0224313	0.433327	3.16586	0.00206769	0.0322316	0.0681733	1.49172
P07355	ANXA2	Annexin A2 OS=Homo sapiens OX=9606 GN=ANXA2 PE=1 SV=2	-0.0108309	0.0108309	-0.146853	-0.117142	-0.0690338	-0.0849171	-0.00318172	-0.0825294	-0.0678106	-0.0538191	-0.119619	-0.0686368	-0.158626	-0.0959274	-0.113337	-0.126636	0	0.0720601	0.202612	-0.0651048	-0.0321884	0.0351971	0.0438138	0.116249	0.456857	6.3	0.00206822	0.0322316	-0.17123	1.49172
Q9UPT9	USP22	Ubiquitin carboxyl-terminal hydrolase 22 OS=Homo sapiens OX=9606 GN=USP22 PE=1 SV=2	0.00468423	-0.00468423	-0.189295	0.0474066	0.028615	-0.0723692	-0.0711365	0.00513577	-0.117764	-0.174806	-0.15751	-0.0917774	-0.0916537	-0.102767	-0.198511	-0.146126	0	0.0835717	0.0144981	0.0754863	0.00235202	-0.0196717	0.0251158	0.0379514	0.461439	4.14673	0.00207474	0.0322627	-0.191077	1.4913
P52272	HNRNPM	Heterogeneous nuclear ribonucleoprotein M OS=Homo sapiens OX=9606 GN=HNRNPM PE=1 SV=3	0.00351564	-0.00351564	0.0112076	-0.0104562	0.00299993	0.0117025	0.0202098	-0.0180985	-0.0181836	0.0128887	-0.0343343	0.000396514	-0.0138712	0.00767353	-0.0850171	-0.0432176	0	0.0172714	-0.00504203	0.0285029	-0.0159445	-0.00628051	0.00685639	0.0522983	0.638886	3.10245	0.00208013	0.0322761	-0.0626129	1.49112
Q14644	RASA3	Ras GTPase-activating protein 3 OS=Homo sapiens OX=9606 GN=RASA3 PE=1 SV=3	-0.0368388	0.0368388	-0.00656114	-0.0832792	0.0177342	-0.0870527	-0.0339404	-0.093997	-0.0369794	0.0186506	-0.0593943	-0.0927642	-0.0872022	-0.0890633	-0.119129	-0.133195	0	0.0379709	0.0564479	0.0602858	0.0339354	0.0451466	0.0763956	0.0982682	0.476864	3.48323	0.00208908	0.0322938	-0.106124	1.49088
Q86SQ0	PHLDB2	Pleckstrin homology-like domain family B member 2 OS=Homo sapiens OX=9606 GN=PHLDB2 PE=1 SV=2	-0.0508056	0.0508056	0.273436	0.0538397	0.217511	0.153308	0.296958	0.189662	0.0247613	0.32481	0.144236	0.23766	0.186389	0.233218	0.342159	0.195994	0	-0.0346548	-0.145738	0.0214324	0.0161652	-0.125754	0.103987	0.00296669	0.539669	6.3	0.00209334	0.0322938	0.223859	1.49088
P04083	ANXA1	Annexin A1 OS=Homo sapiens OX=9606 GN=ANXA1 PE=1 SV=2	0.00397465	-0.00397465	-0.0523111	-0.00980066	-0.013159	0.0191666	-0.0133862	0.00716092	-0.0272065	0.0168468	-0.0611272	-0.0279278	-0.0781815	-0.0203826	-0.073554	-0.10276	0	0.022004	0.212631	-0.0655761	0.0484477	0.000406609	0.0867927	0.0994909	0.638508	3.45813	0.00209488	0.0322938	-0.0815788	1.49088
A0A087WV05	readthrough,	readthrough, Uncharacterized protein OS=Homo sapiens OX=9606 PE=3 SV=1	-0.0406084	0.0406084	0.0199656	-0.000506165	0.0755226	0.0863529	0.0664971	0.0526795	0.0488645	0.043904	0.0839853	0.0162058	0.0840114	0.0582198	0.0721153	0.105165	0	0.0661274	0.0478765	0.0892227	0.0429465	0.0488857	0.0673216	0.0889391	0.464937	6.3	0.00210497	0.032316	0.0990241	1.49058
Q13330	MTA1	Metastasis-associated protein MTA1 OS=Homo sapiens OX=9606 GN=MTA1 PE=1 SV=2	-0.0115764	0.0115764	-0.0309184	-0.0238395	-0.0464808	-0.0369533	-0.0463369	-0.0352864	-0.0820838	-0.0431093	-0.0390343	-0.0271213	-0.0854687	-0.00902243	-0.0941151	-0.0359997	0	-0.0828134	-0.0648467	-0.108614	-0.0286554	-0.0226572	-0.0841181	-0.140929	0.493542	6.3	0.0021054	0.032316	-0.0631586	1.49058
F8W6G6	LILRB3	Isoform of O75022, Leukocyte immunoglobulin-like receptor subfamily B member 3 OS=Homo sapiens OX=9606 GN=LILRB3 PE=1 SV=2	-0.122388	0.122388	0.159912	0.0826282	-0.0567172	0.135354	0.282757	0.0879487	-0.0478014	0.14601	0.228125	0.177854	0.330387	0.372972	0.271094	0.225087	0	0.187234	0.0949246	0.40019	0.0209625	0.00672505	0.0150194	0.160159	0.483769	4.01738	0.00212469	0.032542	0.234048	1.48756
Q9BY77-2	POLDIP3	Isoform of Q9BY77, Isoform 2 of Polymerase delta-interacting protein 3 OS=Homo sapiens OX=9606 GN=POLDIP3 PE=1 SV=2	-0.0670031	0.0670031	0.131575	0.0606452	0.0827159	0.0143694	0.0450877	0.0194589	-0.000976929	0.128329	0.183961	0.093464	0.115631	0.175158	0.120878	0.17687	0	0.018331	0.0448043	0.0617672	0.125223	0.160709	-0.022924	0.0392574	0.456987	4.12143	0.00215568	0.0328058	0.162843	1.48405
G3V3A0	SERPINA3	Isoform of P01011, Alpha-1-antichymotrypsin OS=Homo sapiens OX=9606 GN=SERPINA3 PE=1 SV=1	-0.0227455	0.0227455	-0.042768	-0.116512	-0.106046	-0.0483329	-0.00523621	-0.0840403	-0.0587125	-0.0236362	0.0203405	-0.0487809	0.0648652	0.0825561	0.115921	0.0681965	0	-0.116462	-0.0402171	0.0515479	0.0404691	0.0176166	-0.0303579	-0.0794195	0.636962	3.79115	0.00215626	0.0328058	0.132546	1.48405
Q86UX7	FERMT3	Fermitin family homolog 3 OS=Homo sapiens OX=9606 GN=FERMT3 PE=1 SV=1	0.0080544	-0.0080544	-0.0215821	-0.0153976	-0.00647358	-0.0539664	-0.0208407	-0.0592684	-0.0215252	-0.0466393	-0.0398368	-0.0980023	-0.0283547	-0.0752339	-0.0314774	-0.0473505	0	0.0312542	0.0398164	0.0445226	0.0189573	0.00352857	0.0321982	0.0330791	0.506149	5.74823	0.00215661	0.0328058	-0.0535708	1.48405
O95777	LSM8	U6 snRNA-associated Sm-like protein LSm8 OS=Homo sapiens OX=9606 GN=LSM8 PE=1 SV=3	-0.0106989	0.0106989	0.032587	0.0165068	0.0689406	0.022161	0.120294	0.0364188	0.0524978	0.0274416	0.0650651	0.0991201	0.133263	0.016569	0.0880375	0.058892	0	-0.0164159	-0.0558071	0.00862898	-0.0542535	-0.0282422	-0.0380507	-0.00747404	0.486241	5.78872	0.00216236	0.0328058	0.0722569	1.48405
Q9H0F6	SHARPIN	Sharpin OS=Homo sapiens OX=9606 GN=SHARPIN PE=1 SV=1	0.000588745	-0.000588745	0.0385673	0.0311657	-0.0035479	0.0296275	0.00587787	0.0489333	0.0449873	-0.00299945	0.0515836	0.0667542	0.0432571	0.0355667	0.0942865	0.0259905	0	0.0354855	0.00229915	0.0473853	0.107528	0.0443353	0.0161336	0.0140333	0.416737	4.43884	0.00216918	0.0328058	0.0378466	1.48405
Q9BRP8	PYM1	Partner of Y14 and mago OS=Homo sapiens OX=9606 GN=PYM1 PE=1 SV=1	-0.00373038	0.00373038	0.109626	0.0420242	0.0371077	0.0668539	0.0921619	0.0504396	0.0765083	0.0358921	0.0688137	0.0473466	0.0414323	0.081601	0.0447804	0.0752211	0	0.0417217	0.0743161	0.0368517	0.0380606	0.0559517	0.0103621	0.00998336	0.636632	6.3	0.00216955	0.0328058	0.0621291	1.48405
Q14166	TTLL12	Tubulin--tyrosine ligase-like protein 12 OS=Homo sapiens OX=9606 GN=TTLL12 PE=1 SV=2	-0.00686721	0.00686721	0.00444786	0.0387873	0.0223327	-0.0178638	-5.16936e-05	-0.0334991	-0.014527	-0.0484036	-0.0293342	-0.0620536	-0.00562808	-0.0285626	-0.0586456	-0.108717	0	0.0613549	0.0472622	0.0615259	0.0454527	0.0334072	0.0396774	0.0205817	0.557621	3.35811	0.00219337	0.0330958	-0.075432	1.48023
H0YI08	IRAG1	Isoform of Q9Y6F6, Inositol 1,4,5-triphosphate receptor-associated 1 OS=Homo sapiens OX=9606 GN=IRAG1 PE=1 SV=1	-0.000473895	0.000473895	0.0489722	-0.00177319	0.0472325	0.0316496	-0.00209449	0.0174369	0.096438	0.0561137	0.10581	0.0677487	0.0686459	0.0820994	0.0481899	0.0253081	0	-0.00340312	-0.0374846	-0.0897393	-0.0177584	-0.013794	-0.0267838	-0.0307721	0.602013	4.76472	0.00219841	0.0331017	0.0548024	1.48015
P61925	PKIA	cAMP-dependent protein kinase inhibitor alpha OS=Homo sapiens OX=9606 GN=PKIA PE=1 SV=2	-0.0317962	0.0317962	0.16987	0.0743088	0.1422	0.109818	0.172762	0.169152	0.230313	0.186372	0.213957	0.156406	0.0670485	0.14004	0.0816252	0.0946044	NA	NA	NA	NA	NA	NA	NA	NA	0.635666	6.3	0.0022089	0.0331257	0.150351	1.47984
P19447	ERCC3	General transcription and DNA repair factor IIH helicase subunit XPB OS=Homo sapiens OX=9606 GN=ERCC3 PE=1 SV=1	0.024104	-0.024104	-0.0715997	-0.0524663	-0.0460777	-0.0746292	-0.115643	-0.0802332	-0.0554036	-0.000660485	-0.0586828	-0.1521	-0.0591438	-0.0594447	-0.144439	-0.0961656	0	0.0715035	0.0225509	-0.034279	0.0546837	0.0351275	0.0162977	0.0537339	0.277733	4.25528	0.0022112	0.0331257	-0.0536892	1.47984
Q9ULH1	ASAP1	Arf-GAP with SH3 domain, ANK repeat and PH domain-containing protein 1 OS=Homo sapiens OX=9606 GN=ASAP1 PE=1 SV=4	-0.0131101	0.0131101	-0.0179117	-0.000578809	-0.0325771	-0.0128608	-0.0531078	-0.0313757	-0.0219751	-0.0342293	-0.0389201	-0.0364057	-0.00510485	-0.0358106	-0.0381606	-0.0362079	0	0.0576288	0.0358354	0.0716321	0.0652313	0.0101265	0.0602502	0.0368812	0.582684	5.76026	0.00221396	0.0331257	-0.0326441	1.47984
Q96Q05	TRAPPC9	Trafficking protein particle complex subunit 9 OS=Homo sapiens OX=9606 GN=TRAPPC9 PE=1 SV=2	0.00454634	-0.00454634	-0.00445423	-0.00167332	-0.0107142	-0.029826	-0.0330852	-0.0235205	-0.0185359	-0.00096767	-0.00837182	-0.087193	-0.0258997	-0.0431701	-0.0309828	-0.0679876	0	0.0269365	0.0188065	0.0189921	0.031795	0.00933565	0.0140012	0.0324574	0.428517	4.30119	0.00225472	0.0336073	-0.0337865	1.47357
Q92820	GGH	Gamma-glutamyl hydrolase OS=Homo sapiens OX=9606 GN=GGH PE=1 SV=2	0.0137883	-0.0137883	0.016295	0.00531422	-0.0116225	-0.0263092	0.0117227	-0.010682	-0.0122287	-0.0334577	0.0338791	-0.0181574	0.000556759	0.0175299	0.0564235	0.0784746	0	0.0316516	0.0475067	0.0389995	0.0368809	-0.00343436	0.0317181	-0.0125937	0.634537	3.17485	0.00225559	0.0336073	0.0706611	1.47357
A5YKK6	CNOT1	CCR4-NOT transcription complex subunit 1 OS=Homo sapiens OX=9606 GN=CNOT1 PE=1 SV=2	-0.00857471	0.00857471	0.00497425	-0.00780577	0.00778319	-0.0151735	-0.0111404	-0.0144058	-0.0211013	-0.0135135	-0.0216864	-0.0425892	-0.0271674	-0.0202382	-0.00226286	-0.0428098	0	0.00334751	-0.00711326	0.0235342	0.0134878	-0.001684	-0.0063126	0.0167976	0.52865	4.9449	0.00226634	0.0336971	-0.025413	1.47241
Q92905	COPS5	COP9 signalosome complex subunit 5 OS=Homo sapiens OX=9606 GN=COPS5 PE=1 SV=4	0.000214328	-0.000214328	0.0656106	0.026974	0.0395659	0.0278038	0.0542841	0.0312798	0.0428846	0.00649574	0.0517092	0.0278077	0.0382833	0.0486861	0.0437351	0.0519325	0	0.0298131	0.0239301	0.0242237	0.0540887	0.0289938	-0.00155465	0.0229334	0.628646	6.3	0.00227141	0.0337021	0.0397931	1.47234
P20702	ITGAX	Integrin alpha-X OS=Homo sapiens OX=9606 GN=ITGAX PE=1 SV=3	0.0298151	-0.0298151	-0.173785	-0.158288	-0.112399	-0.142043	-0.296159	-0.100514	-0.100371	-0.0308648	-0.128949	-0.201698	-0.256729	-0.119713	-0.19061	-0.211028	0	-0.0965766	-0.0453892	-0.238213	-0.134419	-0.0386901	-0.0152593	-0.180122	0.242036	4.04592	0.0022916	0.0339309	-0.102392	1.46941
P13804	ETFA	Electron transfer flavoprotein subunit alpha, mitochondrial OS=Homo sapiens OX=9606 GN=ETFA PE=1 SV=1	0.00134711	-0.00134711	-0.0188573	-0.0603747	0.0178786	-0.0634465	0.0295988	-0.0381001	-0.0472774	-0.107505	-0.0278041	-0.0591893	-0.115685	-0.0827328	-0.0640569	-0.0772741	0	-0.0244765	-0.0272073	0.0230333	-0.0403917	-0.0491347	-0.0136569	-0.0684561	0.458489	4.59801	0.00230451	0.0340513	-0.0813731	1.46787
O00483	NDUFA4	Cytochrome c oxidase subunit NDUFA4 OS=Homo sapiens OX=9606 GN=NDUFA4 PE=1 SV=1	2.20805e-05	-2.20805e-05	-0.350241	-0.099036	-0.0470031	0.00977203	-0.0570061	-0.0689408	-0.138098	0.0298486	-0.306196	-0.154319	-0.263252	-0.163211	-0.348695	-0.338033	NA	NA	NA	NA	NA	NA	NA	NA	0.521444	4.11697	0.00230987	0.0340598	-0.219533	1.46776
Q96B02	UBE2W	Ubiquitin-conjugating enzyme E2 W OS=Homo sapiens OX=9606 GN=UBE2W PE=1 SV=1	0.0290096	-0.0290096	0.0286231	0.124424	0.0988096	0.0567898	0.0483959	0.0334906	0.076915	0.0397428	0.0256847	0.119375	0.143486	0.0491299	0.103877	0.203018	0	0.0739137	0.12427	0.0971048	0.171149	0.107212	0.137778	0.122436	0.443199	4.61265	0.00231802	0.0341094	0.179049	1.46713
P14770	GP9	Platelet glycoprotein IX OS=Homo sapiens OX=9606 GN=GP9 PE=1 SV=3	0.0560062	-0.0560062	-0.152916	-0.202951	-0.107984	-0.0829986	-0.0326813	-0.0174057	-0.0187455	-0.1267	-0.163089	-0.155171	-0.214957	-0.202636	-0.147364	-0.201796	0	0.0718244	-0.0827269	-0.198954	-0.23134	-0.337559	-0.246883	-0.206384	0.453242	4.1583	0.00233307	0.0342601	-0.131105	1.46521
P83916	CBX1	Chromobox protein homolog 1 OS=Homo sapiens OX=9606 GN=CBX1 PE=1 SV=1	-0.00211565	0.00211565	0.0573595	0.0153091	0.0499038	0.0460474	-0.00460606	0.0400519	0.0543408	0.037143	0.0484004	0.0270049	0.0597925	0.0687371	0.0748549	0.0192976	0	-0.0817548	0.0112066	-0.00438878	0.000707937	-0.00729934	-0.0120799	0.0263434	0.473516	6.3	0.00234894	0.0344004	0.0610583	1.46344
Q9Y5K5	UCHL5	Ubiquitin carboxyl-terminal hydrolase isozyme L5 OS=Homo sapiens OX=9606 GN=UCHL5 PE=1 SV=3	-0.077823	0.077823	0.172667	0.272065	0.00744287	0.188841	0.106366	0.210048	0.122144	0.175213	0.11375	0.175985	0.134546	0.221177	0.230207	0.373714	0	-0.106904	0.0350062	0.285364	0.0257686	0.0531589	0.125941	0.0602827	0.439585	6.3	0.00235229	0.0344004	0.343638	1.46344
O43852	CALU	Calumenin OS=Homo sapiens OX=9606 GN=CALU PE=1 SV=2	0.0124723	-0.0124723	0.0192269	0.00576361	0.00552877	0.0227356	-0.0153817	0.0180613	0.0273949	0.000520838	0.0602047	0.0303817	0.0378534	0.0184003	0.0717029	0.0308028	0	0.0277557	0.0560411	0.0243221	0.0189104	0.0594992	0.0798293	0.0775756	0.536494	4.4632	0.00236935	0.0344712	0.0359654	1.46254
Q16576	RBBP7	Histone-binding protein RBBP7 OS=Homo sapiens OX=9606 GN=RBBP7 PE=1 SV=1	-0.029525	0.029525	0.0347762	0.031133	-0.00624684	0.0439044	-0.042952	-0.0189905	0.048856	0.0178296	0.0893154	0.035837	0.0495032	0.103465	0.0978426	0.130244	0	-0.0410187	0.0301779	0.0823131	-0.0514702	0.0170319	-0.00932897	0.0133887	0.595427	4.4949	0.00236981	0.0344712	0.0802071	1.46254
Q9H6S3	EPS8L2	Epidermal growth factor receptor kinase substrate 8-like protein 2 OS=Homo sapiens OX=9606 GN=EPS8L2 PE=1 SV=2	-0.0373237	0.0373237	0.0649222	0.0337368	0.0961545	0.0256413	0.129611	0.0430841	0.0936251	0.0893641	0.0649612	0.0859915	0.115688	0.0727709	0.0359496	0.127694	0	0.0458953	0.146498	0.211033	0.0931574	0.14998	0.132085	0.134522	0.535149	6.11258	0.00237594	0.0344712	0.0924169	1.46254
Q9UIV1	CNOT7	CCR4-NOT transcription complex subunit 7 OS=Homo sapiens OX=9606 GN=CNOT7 PE=1 SV=3	-0.028953	0.028953	0.0917701	-0.00909602	-0.00820317	-0.0110859	0.0308824	0.0228197	0.00670725	0.0501102	0.0475295	0.0731112	0.0818588	0.0885206	0.0517628	0.107676	0	0.0575323	0.0206468	0.0887948	0.0176706	0.0154942	-0.00175618	0.0536275	0.51638	4.24859	0.00237649	0.0344712	0.0747856	1.46254
O15173	PGRMC2	Membrane-associated progesterone receptor component 2 OS=Homo sapiens OX=9606 GN=PGRMC2 PE=1 SV=1	-0.0464251	0.0464251	0.0436402	0.156425	0.19937	0.266517	0.139239	0.188477	0.0656879	0.198851	0.227868	0.243831	0.136139	0.255087	0.17831	0.0911827	0	0.0273285	0.177061	-0.0332849	-0.0157813	0.0788577	0.0810805	0.204251	0.631516	6.00964	0.00238475	0.0345207	0.182548	1.46192
Q15019	SEPTIN2	Septin-2 OS=Homo sapiens OX=9606 GN=SEPTIN2 PE=1 SV=1	0.0187974	-0.0187974	0.0649305	0.0393397	0.0534744	0.0469469	0.0282053	0.0214334	0.019932	0.0153261	0.0657574	0.022883	0.0514268	0.0429687	0.096079	0.0724456	0	0.0429812	-0.00202255	0.0295002	0.0100448	-0.00878436	0.0043324	0.0142067	0.425042	3.22856	0.00239363	0.034579	0.0574675	1.46119
P35237	SERPINB6	Serpin B6 OS=Homo sapiens OX=9606 GN=SERPINB6 PE=1 SV=3	0.00692664	-0.00692664	0.0138522	0.00361303	0.00888898	0.000639575	-0.0238482	-0.0283943	-0.0103494	-0.0253719	0.0059605	0.0279444	0.0214352	0.0307913	0.0397394	0.0439537	0	0.0442483	0.0292744	0.0506127	0.0220631	0.00127781	0.0147742	0.0326931	0.630918	4.01286	0.00241101	0.03472	0.0390628	1.45942
E9PJX4	FGD4	Isoform of Q96M96, FYVE, RhoGEF and PH domain-containing protein 4 OS=Homo sapiens OX=9606 GN=FGD4 PE=1 SV=1	0.0265969	-0.0265969	-0.0046703	-0.0489425	-0.194856	0.00858585	-0.0445411	-0.133352	-0.125391	-0.164975	-0.093748	0.084868	-0.226377	-0.308843	-0.18358	-0.261222	NA	NA	NA	NA	NA	NA	NA	NA	0.463725	3.78338	0.00241471	0.03472	-0.226763	1.45942
Q96S59	RANBP9	Ran-binding protein 9 OS=Homo sapiens OX=9606 GN=RANBP9 PE=1 SV=1	0.0275394	-0.0275394	-0.0391948	0.0264016	-0.0802871	-0.0623514	-0.076944	-0.119064	-0.0420143	-0.0361413	-0.0126235	-0.136572	-0.0641865	-0.113596	-0.0977287	-0.0861066	0	0.0302588	0.0277657	0.0880219	0.0568382	0.00498965	0.0421978	0.0581732	0.535817	5.75565	0.00241802	0.03472	-0.0784004	1.45942
P42704	LRPPRC	Leucine-rich PPR motif-containing protein, mitochondrial OS=Homo sapiens OX=9606 GN=LRPPRC PE=1 SV=3	0.0053618	-0.0053618	-0.044041	-0.021333	0.0141797	-0.0421231	-0.000725381	-0.0119598	-0.108982	-0.022801	-0.119645	-0.0640494	-0.0659185	-0.0692451	-0.0456702	-0.0609144	0	0.0249102	0.0306962	0.112439	0.0141671	0.0300853	0.0723536	-0.00944021	0.598866	4.6423	0.00242981	0.03478	-0.0603268	1.45867
Q8WTW3	COG1	Conserved oligomeric Golgi complex subunit 1 OS=Homo sapiens OX=9606 GN=COG1 PE=1 SV=1	-0.0075467	0.0075467	-0.0524907	-0.0725161	-0.0694843	-0.0518341	-0.0705196	-0.0157019	-0.0299172	0.00747434	-0.0820415	-0.0367137	-0.0829702	-0.0619723	-0.0677477	-0.136924	0	-0.0496832	-0.0726658	-0.104217	-0.0787203	-0.11232	-0.10577	-0.0931628	0.408451	3.57443	0.00243196	0.03478	-0.0719937	1.45867
A0A024RCL9	LST1	Isoform of O00453, Leukocyte specific transcript 1, isoform CRA_c OS=Homo sapiens OX=9606 GN=LST1 PE=1 SV=1	0.0209645	-0.0209645	0.0640468	0.0231383	0.091367	0.0107303	0.0409576	-0.0110533	0.0212938	0.0280535	0.0959267	0.0750159	0.0922112	0.0715399	0.167506	0.0421615	0	-0.0139754	-0.0473861	0.0131755	-0.0212471	-0.0503064	0.000992501	0.0292236	0.475879	4.20581	0.00244067	0.0348346	0.0716146	1.45799
Q5QPM7	PSMF1	Isoform of Q92530, Proteasome inhibitor PI31 subunit OS=Homo sapiens OX=9606 GN=PSMF1 PE=1 SV=2	0.00602623	-0.00602623	0.00446215	-0.0310454	-0.0276896	0.0280622	0.0168774	0.0198697	-0.0579531	-0.00846077	-0.00431533	-0.00599293	-0.0597049	-0.0442389	-0.0644503	-0.0912777	0	0.00311959	-0.0348704	-0.0650308	-0.0356825	-0.0467411	-0.0813366	-0.00742501	0.630007	3.5779	0.00245154	0.0349101	-0.073244	1.45705
Q6JBY9	RCSD1	CapZ-interacting protein OS=Homo sapiens OX=9606 GN=RCSD1 PE=1 SV=1	0.0249842	-0.0249842	0.0270317	0.0125428	0.00992041	0.0114177	0.010928	0.00828444	0.0177358	0.00224823	0.0372933	0.0199682	0.0302487	0.0407247	0.049779	0.0422061	0	0.00172937	0.00457675	-0.015522	-0.00161111	-0.00443102	0.00685252	-0.00848521	0.496901	3.50591	0.00245999	0.0349101	0.0412043	1.45705
Q53YP1	HLA-C	Isoform of P10321, HLA class I histocompatibility antigen OS=Homo sapiens OX=9606 GN=HLA-C PE=1 SV=1	-0.0562521	0.0562521	-0.140572	0.00410285	-0.00417253	0.0616081	0.00467476	-0.0621183	-0.130112	-0.107604	-0.0580238	-0.292518	-0.118626	-0.0641971	-0.304219	-0.216908	0	-0.218904	0.0668621	-0.0803085	0.0925296	-0.11201	-0.149043	0.00346	0.519161	3.42483	0.00246066	0.0349101	-0.229292	1.45705
Q08AF3	SLFN5	Schlafen family member 5 OS=Homo sapiens OX=9606 GN=SLFN5 PE=1 SV=1	-0.00177562	0.00177562	0.0238633	0.0198198	0.0105122	0.004266	0.0331874	-0.0544325	-0.00438286	-0.0259035	-0.0256343	-0.0923307	-0.0507929	-0.0382569	-0.0469641	-0.0722087	0	0.0233497	-0.000347616	0.00189196	-0.0338436	-0.0452357	-0.0284486	0.0131262	0.608374	4.47801	0.00250998	0.035539	-0.0618467	1.4493
O94906	PRPF6	Pre-mRNA-processing factor 6 OS=Homo sapiens OX=9606 GN=PRPF6 PE=1 SV=1	-0.00628329	0.00628329	-0.0413977	-0.0288151	-0.0241281	-0.024606	-0.0494953	-0.0438442	-0.0322048	-0.0079393	-0.04617	-0.0348651	-0.0069131	-0.0551475	-0.0342796	-0.0651434	0	-0.0146843	-0.0592271	-0.0479925	-0.0199988	-0.00981725	-0.0459625	-0.0135382	0.425919	6.3	0.00253174	0.035776	-0.0285577	1.44641
Q96P11-2	NSUN5	Isoform of Q96P11, Isoform 2 of 28S rRNA (cytosine-C(5))-methyltransferase OS=Homo sapiens OX=9606 GN=NSUN5 PE=1 SV=2	-0.0090067	0.0090067	-0.0396137	-0.0253633	-0.0523874	0.0093697	0.0103317	0.0101664	0.00693873	-0.00443954	0.00795455	-0.0250325	-0.0452656	-0.0141352	-0.0776736	-0.088426	0	0.058705	0.0422557	0.0418696	0.0610264	0.0548239	0.00938937	0.0139881	0.627792	3.39463	0.00255243	0.0359969	-0.0758983	1.44374
Q96EH3	MALSU1	Mitochondrial assembly of ribosomal large subunit protein 1 OS=Homo sapiens OX=9606 GN=MALSU1 PE=1 SV=1	-0.0446743	0.0446743	0.105761	-0.0457107	0.00906845	0.0150545	0.117332	0.0819378	0.160564	0.0971609	0.120881	0.101959	0.0290494	0.0693582	0.13211	0.146026	NA	NA	NA	NA	NA	NA	NA	NA	0.541448	5.20358	0.00256518	0.036096	0.0970678	1.44254
P16885	PLCG2	1-phosphatidylinositol 4,5-bisphosphate phosphodiesterase gamma-2 OS=Homo sapiens OX=9606 GN=PLCG2 PE=1 SV=4	-0.00457722	0.00457722	-0.0120542	0.0166359	-0.0113355	0.0199728	-0.0206836	-0.0441457	-0.0130367	-0.032712	-0.0278433	-0.00654623	-0.0372325	-0.0186832	-0.0302622	-0.0369328	0	0.0467798	0.0447208	0.0714586	0.0539841	0.0373299	0.0370767	0.0255129	0.611969	5.27906	0.00257292	0.036096	-0.0285162	1.44254
Q9HCS7	XAB2	Pre-mRNA-splicing factor SYF1 OS=Homo sapiens OX=9606 GN=XAB2 PE=1 SV=2	0.0306356	-0.0306356	-0.0890145	-0.0299943	-0.0712483	-0.0748909	-0.132159	-0.103035	-0.0114109	-0.0486232	-0.0985542	-0.0718881	-0.0945778	-0.0728496	-0.113211	-0.0808908	0	-0.0165022	-0.0180871	-0.0235558	-0.0264705	-0.0510992	-0.0343628	-0.00888118	0.549116	6.20515	0.00257626	0.036096	-0.0822545	1.44254
P31949	S100A11	Protein S100-A11 OS=Homo sapiens OX=9606 GN=S100A11 PE=1 SV=2	-0.00430742	0.00430742	-0.00690536	0.048426	0.0241628	0.0523383	-0.00102323	0.0207216	0.0387724	-0.00304646	0.0539358	0.0499349	0.0888721	0.038708	0.0729266	0.0273589	0	-0.00966692	-0.0114443	0.00113969	-0.0112253	-0.0163084	-0.023733	0.0143648	0.466545	4.24834	0.00258028	0.036096	0.0430552	1.44254
E9PN10	EBAG9	Isoform of O00559, Receptor-binding cancer antigen-expressed on SiSo cells (Fragment) OS=Homo sapiens OX=9606 GN=EBAG9 PE=1 SV=1	-0.0579381	0.0579381	-0.0102688	0.00668892	-0.0434308	0.00031001	0.105741	-0.0314588	0.0945156	0.077843	0.149451	0.157688	0.0462775	0.124768	0.0832405	0.134604	NA	NA	NA	NA	NA	NA	NA	NA	0.606082	4.84804	0.00258481	0.036096	0.1196	1.44254
Q9H999	PANK3	Pantothenate kinase 3 OS=Homo sapiens OX=9606 GN=PANK3 PE=1 SV=1	-0.028249	0.028249	0.0786342	0.0523188	0.0637328	0.0182034	0.090115	0.0370726	0.0655648	0.0788331	0.042427	0.0700933	0.0383637	0.0671172	0.113844	0.0600326	0	-0.0666212	-0.0607667	-0.0640126	-0.0258107	-0.126042	-0.0745437	-0.0542226	0.527597	6.3	0.00259402	0.0361253	0.062614	1.44219
A0A6I8PIV1	LARS1	Isoform of Q9P2J5, Leucyl-tRNA synthetase OS=Homo sapiens OX=9606 GN=LARS1 PE=1 SV=1	0.00784565	-0.00784565	-0.0454444	0.00604358	-0.0232238	-0.000534513	-0.0376627	-0.0637246	-0.0331569	-0.0475549	-0.0504461	-0.0775482	0.00848783	-0.0505467	-0.0573513	-0.0667023	0	0.0254611	0.0317493	0.0468274	0.0179865	0.00423187	-0.004123	0.0118057	0.486978	5.42765	0.00259704	0.0361253	-0.041057	1.44219
Q5SSJ5	HP1BP3	Heterochromatin protein 1-binding protein 3 OS=Homo sapiens OX=9606 GN=HP1BP3 PE=1 SV=1	-0.00946437	0.00946437	-0.0522734	0.0375271	0.0323205	0.0473521	0.00127279	0.0138224	-0.0234132	0.044075	-0.0525886	-0.0330567	-0.0988279	-0.0239998	-0.0841395	-0.0890056	0	0.0451993	0.0320675	-0.0537428	0.0435528	0.0654986	0.0619096	0.0624485	0.626401	4.02224	0.00261759	0.0362212	-0.0880391	1.44104
Q96LT9	RNPC3	RNA-binding region-containing protein 3 OS=Homo sapiens OX=9606 GN=RNPC3 PE=1 SV=1	-0.0395586	0.0395586	0.0691434	0.0416564	0.00738636	-0.0167123	0.159876	-0.027575	-0.0302941	0.0529302	0.063809	0.109627	0.183925	0.225515	0.119821	0.161225	0	-0.145771	-0.0172695	-0.183113	0.0297249	0.0357619	-0.013534	-0.0791989	0.610934	3.98634	0.00262317	0.0362212	0.151258	1.44104
P41208	CETN2	Centrin-2 OS=Homo sapiens OX=9606 GN=CETN2 PE=1 SV=1	0.0444428	-0.0444428	0.104091	0.072042	0.0306567	0.063713	0.026311	0.107732	0.0807206	0.0182465	0.078656	0.0960533	0.0776866	0.0586608	0.105518	0.177173	0	0.0793035	0.100654	-0.0191891	0.0459368	0.0867514	0.0492113	0.0982231	0.433337	4.6952	0.00262426	0.0362212	0.164004	1.44104
H0YNF3	SLTM	Isoform of Q9NWH9, SAFB-like transcription modulator (Fragment) OS=Homo sapiens OX=9606 GN=SLTM PE=1 SV=1	-0.0243163	0.0243163	0.144406	0.248058	0.173333	0.216231	0.258394	0.185971	0.101176	0.18184	0.174725	0.577513	0.22568	0.196946	0.247971	0.252815	0	-0.223039	-0.230771	-0.175227	-0.146586	-0.130724	-0.21785	-0.163476	0.29466	4.42415	0.00262429	0.0362212	0.156663	1.44104
Q9Y6M7-7	SLC4A7	Isoform of Q9Y6M7, Isoform 7 of Sodium bicarbonate cotransporter 3 OS=Homo sapiens OX=9606 GN=SLC4A7 PE=1 SV=2	-0.0125809	0.0125809	0.0743778	0.0174058	0.077956	0.0155654	0.143824	0.0350398	0.0269885	0.0372505	0.0811008	0.0949223	0.0916588	0.0953706	0.0385796	0.109879	0	0.0701237	0.0572205	0.0831445	0.120501	0.0417458	0.0601459	0.139391	0.473148	6.3	0.00265198	0.0365326	0.104573	1.43732
P49902	NT5C2	Cytosolic purine 5'-nucleotidase OS=Homo sapiens OX=9606 GN=NT5C2 PE=1 SV=1	0.105868	-0.105868	-0.0174802	-0.0281565	-0.0183115	-0.100902	-0.274692	-0.151412	-0.0658465	-0.15151	-0.0750589	-0.407045	-0.277694	-0.161555	-0.192231	-0.19852	NA	NA	NA	NA	NA	NA	NA	NA	0.494613	5.47484	0.00267534	0.0367833	-0.187956	1.43435
O15015-1	ZNF646	Isoform of O15015, Isoform 1 of Zinc finger protein 646 OS=Homo sapiens OX=9606 GN=ZNF646 PE=1 SV=2	0.0150899	-0.0150899	-0.0717308	-0.0154388	-0.0391207	0.0345076	0.0403225	-0.0433333	-0.0435302	-0.0199423	-0.0140914	-0.0781502	-0.085468	-0.0670817	-0.0972098	-0.114862	NA	NA	NA	NA	NA	NA	NA	NA	0.577257	3.63937	0.00268897	0.0368376	-0.0966747	1.43371
Q92608	DOCK2	Dedicator of cytokinesis protein 2 OS=Homo sapiens OX=9606 GN=DOCK2 PE=1 SV=2	-0.0282047	0.0282047	-0.0136002	0.0154187	-0.00614702	-0.00212754	-0.0267602	-0.0267296	-0.0255142	0.00313966	-0.0242531	-0.0448277	-0.0313583	-0.0257367	-0.0455515	-0.0607733	0	0.0358088	-0.00458993	0.0282293	0.00839516	-0.0077335	0.00747516	0.0276071	0.486528	3.55014	0.00268963	0.0368376	-0.050808	1.43371
Q5T440	IBA57	Putative transferase CAF17, mitochondrial OS=Homo sapiens OX=9606 GN=IBA57 PE=1 SV=1	-0.0201575	0.0201575	-0.0927534	-0.00892957	-0.00515071	-0.0609371	0.000849558	-0.0172281	-0.0616915	-0.00220052	-0.115528	-0.153268	-0.101989	-0.0863083	-0.068438	-0.0831805	0	-0.0571057	-0.0783394	-0.0633368	-0.0928336	-0.0333313	-0.0349816	-0.0384196	0.604699	4.44123	0.00274709	0.0375524	-0.0830424	1.42536
Q96SQ5	ZNF587	Zinc finger protein 587 OS=Homo sapiens OX=9606 GN=ZNF587 PE=1 SV=1	-0.00142958	0.00142958	0.0252002	0.0954456	0.0561397	0.168193	0.0352377	0.138219	0.0632589	0.187783	0.0835831	0.102357	0.124035	0.133969	0.0695667	0.123218	0	-0.0800338	-0.0829513	-0.068736	-0.0587408	-0.0020439	-0.0471445	-0.0913738	0.568982	6.01269	0.00276524	0.0377038	0.107131	1.42362
Q9Y2W2	WBP11	WW domain-binding protein 11 OS=Homo sapiens OX=9606 GN=WBP11 PE=1 SV=1	0.00466718	-0.00466718	0.0257339	0.0022607	-0.00475172	0.02791	0.0391389	0.0257783	0.0160819	0.00824573	0.0186004	0.001664	0.0872249	0.0425479	0.0389183	0.0458997	0	0.00316208	0.00125675	0.00638386	-0.026706	-0.0226034	-0.0350633	0.0139405	0.572393	3.80479	0.00277559	0.0377038	0.042314	1.42362
Q96F63	CCDC97	Coiled-coil domain-containing protein 97 OS=Homo sapiens OX=9606 GN=CCDC97 PE=1 SV=1	-0.0067762	0.0067762	-0.0117547	-0.0772173	-0.000461343	-0.0119839	-0.0573169	-0.0420856	-0.0407286	-0.0861927	0.00929292	-0.0974405	-0.0416675	-0.0486331	-0.112913	-0.0796671	0	0.0525324	-0.00976083	0.0145663	-0.0108518	-0.0226583	-0.0448276	-0.106261	0.43493	4.56322	0.00277915	0.0377038	-0.115178	1.42362
Q13615	MTMR3	Myotubularin-related protein 3 OS=Homo sapiens OX=9606 GN=MTMR3 PE=1 SV=3	0.0259767	-0.0259767	0.0582282	0.01305	0.00222715	0.0307703	0.0322153	-0.00133231	0.0228981	0.0331934	0.0330942	0.0342588	0.0565155	0.0418147	0.0421131	0.0826013	0	-0.0325136	-0.0438609	-0.0209086	-0.0509415	-0.0520526	0.00107984	-0.0600239	0.444068	3.65909	0.00277934	0.0377038	0.0558247	1.42362
P28161	GSTM2	Glutathione S-transferase Mu 2 OS=Homo sapiens OX=9606 GN=GSTM2 PE=1 SV=2	0.0094019	-0.0094019	0.0539062	0.0309277	0.0319654	0.0279834	0.0562344	0.0188163	0.0377141	-0.00501002	0.0582129	-0.00814086	0.0668444	0.03835	0.0857495	0.121336	0	0.0879074	0.0913718	0.0954737	0.0451321	0.0526699	0.0817611	0.0844698	0.584405	3.40207	0.0027954	0.0378496	0.08247	1.42194
Q9UIB8	CD84	SLAM family member 5 OS=Homo sapiens OX=9606 GN=CD84 PE=1 SV=1	-0.00257701	0.00257701	0.00332655	0.0356501	0.0117818	0.0281161	0.000177992	0.00121583	0.0714977	0.017436	0.0109607	0.0379008	0.04652	0.0954992	0.0312158	0.0570846	0	-0.00614615	-0.0287409	-0.0177119	-0.0242032	-0.00113605	-0.013553	-0.00560296	0.454306	4.45539	0.002806	0.0379209	0.0504771	1.42112
A0A087WWM4	GMPR2	Isoform of Q9P2T1, GMP reductase OS=Homo sapiens OX=9606 GN=GMPR2 PE=1 SV=1	-0.004404	0.004404	0.0163457	0.00325387	0.0184323	0.0147705	0.0393476	0.0226801	0.0204587	-0.00265843	0.0713753	0.0310871	0.00175116	0.035721	0.0368765	0.0537338	0	0.0155362	0.0267811	0.030969	0.00650779	0.0140189	-0.00596366	-0.00183841	0.39035	4.3035	0.0028162	0.0379867	0.027419	1.42037
Q9BUL8	PDCD10	Programmed cell death protein 10 OS=Homo sapiens OX=9606 GN=PDCD10 PE=1 SV=1	-0.00500974	0.00500974	0.0165362	0.00865371	0.0317005	0.0348441	0.0143319	-0.0137566	0.0285091	0.00798998	-0.0115363	0.0521299	0.0458857	0.0252359	0.0836582	0.070906	0	0.0609267	0.0751803	0.134043	0.048559	0.0323912	0.0969214	0.104653	0.622037	3.25133	0.00283118	0.0381144	0.0654152	1.41891
Q9BSY4	CHCHD5	Coiled-coil-helix-coiled-coil-helix domain-containing protein 5 OS=Homo sapiens OX=9606 GN=CHCHD5 PE=1 SV=1	0.037011	-0.037011	-0.000699876	-0.0251733	-0.10938	-0.231954	-0.234066	-0.175438	-0.134942	-0.0911671	-0.158716	-0.0353331	-0.133727	-0.0965002	-0.126516	-0.103441	NA	NA	NA	NA	NA	NA	NA	NA	0.621909	5.8889	0.00283767	0.0381144	-0.136045	1.41891
Q8N357	SLC35F6	Solute carrier family 35 member F6 OS=Homo sapiens OX=9606 GN=SLC35F6 PE=1 SV=1	0.114401	-0.114401	-0.224253	-0.171722	-0.188633	0.0509754	-0.154416	0.0461759	-0.523844	-0.288774	-0.397164	-0.0274748	-0.773329	-0.361796	-0.47395	-0.266276	0	-0.0751909	0.346329	-0.21691	-0.157977	-0.113034	0.0295259	0.198892	0.491449	4.77144	0.00284172	0.0381144	-0.326	1.41891
P01008	SERPINC1	Antithrombin-III OS=Homo sapiens OX=9606 GN=SERPINC1 PE=1 SV=1	0.0704838	-0.0704838	0.0732806	0.0304624	-0.0777096	-0.092321	-0.175814	-0.130767	-0.203186	-0.175663	-0.0818642	-0.0445635	-0.0564254	-0.11622	-0.385297	-0.185013	0	-0.312734	-0.186922	-0.433052	-0.362175	-0.468343	-0.315781	-0.436613	0.443362	3.65663	0.00284902	0.0381404	-0.273158	1.41861
Q15545	TAF7	Transcription initiation factor TFIID subunit 7 OS=Homo sapiens OX=9606 GN=TAF7 PE=1 SV=1	0.0151786	-0.0151786	0.056631	0.065162	0.0608746	0.0335762	0.123	0.0369417	0.0369173	0.050999	0.054074	0.0952591	0.104453	0.0162666	0.103149	0.072334	0	-0.0135716	0.139258	0.0783984	0.0337827	0.0652345	0.0533082	0.026322	0.492992	6.3	0.00286048	0.038222	0.066001	1.41769
Q9BXD5	NPL	N-acetylneuraminate lyase OS=Homo sapiens OX=9606 GN=NPL PE=1 SV=1	-0.00992113	0.00992113	0.00814315	-0.0205086	-0.0246638	-0.0275263	-0.0348867	-0.00788972	-0.0149764	-0.0828486	0.0670799	0.0484222	0.00344323	0.0513167	0.0429518	0.0665005	0	-0.00333573	-0.0178604	-0.0545539	-0.0260981	-0.0397726	-0.0203873	-0.0751773	0.621088	4.23572	0.00287952	0.0383586	0.063836	1.41614
Q13232	NME3	Nucleoside diphosphate kinase 3 OS=Homo sapiens OX=9606 GN=NME3 PE=1 SV=2	0.0287782	-0.0287782	0.025366	-0.0165347	0.0238008	-0.0251824	-0.00221684	-0.00605491	-0.00576135	-0.0323936	0.00618973	-0.0143117	-0.0327412	0.00294375	-0.0712617	-0.107941	0	0.0189921	0.0392726	-0.0858281	-0.0433826	-0.134658	-0.113855	-0.0922481	0.621004	3.15025	0.00288384	0.0383586	-0.0863257	1.41614
Q8N806	UBR7	Putative E3 ubiquitin-protein ligase UBR7 OS=Homo sapiens OX=9606 GN=UBR7 PE=1 SV=2	-0.0336451	0.0336451	0.0275774	0.0200481	-0.00249625	0.00710048	0.0306547	0.0257098	0.031275	0.0204179	0.0715908	0.0432399	0.0519569	0.0327853	0.0629632	0.0328474	0	0.0621183	0.0355678	0.0701604	0.0189549	0.00802745	0.0290563	0.0609216	0.449306	4.86173	0.00289109	0.0383586	0.0467726	1.41614
O75362	ZNF217	Zinc finger protein 217 OS=Homo sapiens OX=9606 GN=ZNF217 PE=1 SV=1	-0.00998179	0.00998179	-0.0451283	-0.0408584	-0.146647	-0.0455742	-0.127381	-0.0311799	-0.122159	-0.185552	-0.141881	-0.0826017	-0.165163	-0.0687262	-0.101729	-0.0593144	0	-0.00557831	-0.0127491	-0.0216925	-0.00525015	0.0496864	-0.0236295	0.00200736	0.57866	5.90395	0.00289224	0.0383586	-0.111235	1.41614
Q9UMS0	NFU1	NFU1 iron-sulfur cluster scaffold homolog, mitochondrial OS=Homo sapiens OX=9606 GN=NFU1 PE=1 SV=2	0.0415214	-0.0415214	-0.0471112	-0.0355114	-0.0102915	-0.0345485	-0.0318387	-0.0986876	-0.103451	-0.0568599	-0.0337167	-0.0456581	-0.0621446	-0.0784159	-0.0647416	-0.0895243	0	-0.0320645	0.0699764	0.0850446	-0.0164124	0.0724949	0.126814	0.0118665	0.456707	6.3	0.00290444	0.0384178	-0.095877	1.41547
Q96PP8	GBP5	Guanylate-binding protein 5 OS=Homo sapiens OX=9606 GN=GBP5 PE=1 SV=1	-0.000587725	0.000587725	-0.0243599	0.0201857	-0.0694632	-0.0523847	-0.0894315	-0.0756708	-0.0226022	-0.0276817	-0.0647248	-0.043394	-0.042586	-0.0383341	-0.0226997	-0.0604872	0	0.0137325	-0.0129277	0.0555173	0.0127117	-0.00940702	0.0232403	0.0315558	0.620397	5.85222	0.00291516	0.0384178	-0.0509298	1.41547
P51970	NDUFA8	NADH dehydrogenase [ubiquinone] 1 alpha subcomplex subunit 8 OS=Homo sapiens OX=9606 GN=NDUFA8 PE=1 SV=3	0.0030392	-0.0030392	-0.0473966	-0.0923467	1.30016e-05	-0.015406	-0.0463041	-0.0292634	0.0398447	0.0605014	0.0278266	-0.121641	-0.0701096	-0.0952633	-0.165388	-0.189673	NA	NA	NA	NA	NA	NA	NA	NA	0.620272	3.39122	0.00292164	0.0384178	-0.163944	1.41547
Q13769	THOC5	THO complex subunit 5 homolog OS=Homo sapiens OX=9606 GN=THOC5 PE=1 SV=2	-0.0188093	0.0188093	-0.0571898	0.0276824	-0.039701	0.0153261	-0.0518571	-0.0183848	-0.0451484	-0.0636882	-0.0569425	-0.0484861	-0.0703949	-0.0460624	-0.055108	-0.0303407	0	0.0592871	-0.0667067	-0.00107211	0.0142777	-0.0260676	-0.00896746	0.022375	0.496967	5.19558	0.00292175	0.0384178	-0.0492182	1.41547
Q96DX4	RSPRY1	RING finger and SPRY domain-containing protein 1 OS=Homo sapiens OX=9606 GN=RSPRY1 PE=1 SV=1	-0.0262846	0.0262846	0.0357148	0.0822897	0.0106892	0.0344444	0.175172	0.0412715	0.146612	0.00298233	0.0792119	0.0882977	0.0209874	0.212599	0.146967	0.150353	0	-0.048067	-0.0698197	-0.284907	-0.0935776	-0.245551	-0.183558	-0.0744502	0.432437	4.84883	0.00292847	0.0384178	0.201792	1.41547
Q8WYA6	CTNNBL1	Beta-catenin-like protein 1 OS=Homo sapiens OX=9606 GN=CTNNBL1 PE=1 SV=1	-0.0104374	0.0104374	-0.0313382	-0.028493	-0.0497844	-0.0733834	-0.0774411	-0.0347003	-0.0285237	0.0167043	-0.0522816	-0.12593	-0.0667729	-0.0334124	-0.143737	-0.0682915	0	-0.0315256	-0.0181504	-0.0695576	-0.0359088	-0.0323143	-0.0494674	-0.0541589	0.386597	4.23761	0.00292907	0.0384178	-0.0562834	1.41547
Q9H477	RBKS	Ribokinase OS=Homo sapiens OX=9606 GN=RBKS PE=1 SV=1	0.0126907	-0.0126907	0.0339051	-0.00153913	0.0277694	0.072407	0.0991827	0.0536791	0.0438351	0.0454874	0.0638934	0.0543718	0.0713861	0.0271095	0.116142	0.0253108	0	0.109594	0.178994	0.134479	0.0897678	0.106101	0.125176	0.164605	0.540439	5.8289	0.00293961	0.0384398	0.0596928	1.41522
Q86WU2	LDHD	Probable D-lactate dehydrogenase, mitochondrial OS=Homo sapiens OX=9606 GN=LDHD PE=1 SV=1	-0.0117046	0.0117046	0.0103737	0.427161	0.341078	0.174879	0.54638	0.244583	0.192784	0.165147	0.110437	0.436299	0.758504	0.223965	0.354771	0.47778	NA	NA	NA	NA	NA	NA	NA	NA	0.440518	6.3	0.00294155	0.0384398	0.607139	1.41522
Q9UJY5	GGA1	ADP-ribosylation factor-binding protein GGA1 OS=Homo sapiens OX=9606 GN=GGA1 PE=1 SV=1	0.00090449	-0.00090449	0.0499967	0.0319322	0.0517074	0.00858204	0.0461856	0.00835443	0.0945568	0.0390458	0.0517602	0.0378544	0.0227913	0.0310822	0.0783749	0.0571751	0	-0.00562757	0.00299237	-0.00385785	0.0190817	0.00530838	-0.00348475	-0.00465334	0.461968	6.3	0.00296764	0.0387097	0.0609752	1.41218
Q99583	MNT	Max-binding protein MNT OS=Homo sapiens OX=9606 GN=MNT PE=1 SV=1	0.00171232	-0.00171232	-0.0459019	-0.0625168	-0.0443187	-0.153701	-0.119058	-0.0345577	-0.0401536	-0.0553522	-0.0337948	-0.0965838	-0.101573	-0.0846587	-0.0760645	-0.128531	0	0.0202647	0.0474493	0.0251776	-0.016657	0.00611337	0.0220964	0.00267527	0.522705	6.03582	0.00297939	0.038792	-0.0806957	1.41126
A0A0B4J231	IGLL5	Isoform of B9A064, Immunoglobulin lambda-like polypeptide 5 OS=Homo sapiens OX=9606 GN=IGLL5 PE=1 SV=1	-0.0566465	0.0566465	0.0881743	0.0739079	0.149077	0.121225	0.252428	0.111782	0.191194	0.0964332	0.135122	0.0914103	0.221424	0.121394	0.130908	0.122492	0	-0.0479646	0.00580329	-0.0238577	-0.0387689	-0.0467011	-0.0125032	-0.0413273	0.615646	6.03477	0.00300442	0.0390376	0.146857	1.40852
P22695	UQCRC2	Cytochrome b-c1 complex subunit 2, mitochondrial OS=Homo sapiens OX=9606 GN=UQCRC2 PE=1 SV=3	0.0179943	-0.0179943	-0.173069	-0.0600597	-0.00768453	-0.0054382	-0.0320147	-0.118264	-0.0518213	-0.0340265	-0.157813	-0.061353	-0.228989	-0.0710416	-0.19841	-0.116278	0	0.093402	0.226542	0.0159595	-0.00206588	-0.0136357	0.126477	0.181866	0.432237	4.07076	0.00301352	0.0390376	-0.120616	1.40852
P13224	GP1BB	Platelet glycoprotein Ib beta chain OS=Homo sapiens OX=9606 GN=GP1BB PE=1 SV=1	-0.0682983	0.0682983	-0.134616	-0.125209	0.00375901	-0.012038	0.0421618	0.0499086	-0.00930162	0.0335187	-0.183208	-0.129227	-0.242596	-0.0637806	-0.243299	-0.351804	0	-0.340788	0.0986822	0.218397	-0.0154619	0.144489	0.127897	0.184032	0.618504	3.53545	0.00301469	0.0390376	-0.274692	1.40852
P83876	TXNL4A	Thioredoxin-like protein 4A OS=Homo sapiens OX=9606 GN=TXNL4A PE=1 SV=1	-0.0362766	0.0362766	0.0141317	0.0221292	0.0359649	-0.00358804	0.0147222	-0.0298887	0.0759341	0.0764683	0.0282732	0.0960457	0.0102641	0.0542347	0.122445	0.159007	0	0.0315703	-0.0436917	-0.00557832	0.0283205	-0.00131802	0.0566435	0.00824382	0.521147	3.23064	0.00303138	0.0391823	0.109103	1.40691
Q9P219	CCDC88C	Protein Daple OS=Homo sapiens OX=9606 GN=CCDC88C PE=1 SV=3	-0.00169254	0.00169254	-0.00369724	0.00705319	0.0151957	-0.0411918	0.00560685	0.0136519	-0.0046538	-0.0049413	-0.0411227	0.00686925	-0.0841808	-0.0105113	-0.095857	-0.052412	0	0.0056059	-0.0121485	0.0301549	-0.0141936	-0.0144323	0.0124254	-0.0255868	0.617983	3.60913	0.00304255	0.0392555	-0.0734906	1.4061
F8VXC8	SMARCC2	Isoform of Q8TAQ2, SWI/SNF complex subunit SMARCC2 OS=Homo sapiens OX=9606 GN=SMARCC2 PE=1 SV=1	-0.00300288	0.00300288	-0.031542	0.0106784	-0.00672145	-0.033896	-0.0628626	-0.0142889	-0.00250771	-0.0299727	-0.0288124	-0.0357609	-0.0129895	-0.0426991	-0.0410678	-0.0514585	0	-0.0476143	0.00574698	-0.0320209	0.0173246	0.0560364	0.0238072	-0.0251449	0.429823	5.9673	0.00306097	0.0394217	-0.0600164	1.40426
B4E3Q4	ADA2	Isoform of Q9NZK5, Adenosine deaminase OS=Homo sapiens OX=9606 GN=ADA2 PE=1 SV=1	0.00883606	-0.00883606	0.0469742	0.0206144	0.020989	0.0310219	0.069415	0.0277853	0.00601287	-0.00275326	0.0458334	0.0561345	0.048405	0.0125172	0.0913577	0.0663036	0	-0.0196833	0.00527391	0.0117182	-0.0211902	-0.0309696	-0.0135601	-0.0206002	0.347072	4.1084	0.00308716	0.0396614	0.0363272	1.40163
O60927	PPP1R11	E3 ubiquitin-protein ligase PPP1R11 OS=Homo sapiens OX=9606 GN=PPP1R11 PE=1 SV=1	-0.00741587	0.00741587	0.0883425	0.0668694	0.126608	0.0135598	0.166708	0.0466599	0.0916873	0.114393	0.0773361	0.212592	0.0708258	0.0934569	0.0693443	0.168426	0	0.0825715	0.0603821	0.0762379	0.0357255	0.0318346	0.00818089	0.0336833	0.505308	6.3	0.00309072	0.0396614	0.133349	1.40163
Q14240	EIF4A2	Eukaryotic initiation factor 4A-II OS=Homo sapiens OX=9606 GN=EIF4A2 PE=1 SV=2	-0.00393849	0.00393849	0.0169615	0.00389046	-0.00413369	-0.0351634	-0.00420683	-0.0401965	0.018743	-0.00316868	0.0150648	0.010483	0.0306513	0.00527165	0.0520643	0.0584948	0	0.0202879	0.0617272	0.0191255	0.0335613	0.000513894	0.0865565	0.0588738	0.61626	3.27359	0.00313633	0.0400893	0.056701	1.39697
K7EN65	MBD1	Isoform of Q9UIS9, Methyl-CpG-binding domain protein 1 (Fragment) OS=Homo sapiens OX=9606 GN=MBD1 PE=1 SV=1	0.0309231	-0.0309231	-0.0628618	-0.0641013	-0.108522	-0.101522	-0.108738	-0.0654123	-0.0213559	-0.0280173	-0.07435	-0.117391	-0.0632772	-0.0813445	-0.106605	-0.107417	0	-0.235167	-0.223246	-0.355083	-0.202745	-0.158705	-0.296667	-0.264691	0.227001	4.22236	0.00314189	0.0400893	-0.0461236	1.39697
O95391	SLU7	Pre-mRNA-splicing factor SLU7 OS=Homo sapiens OX=9606 GN=SLU7 PE=1 SV=2	-0.0301584	0.0301584	0.0881728	0.0626108	0.0535953	0.0613464	0.136965	0.0148967	0.0682748	0.0446993	0.011635	0.128586	0.128515	0.11398	0.11327	0.073419	0	-0.0061564	0.00637199	0.0119563	0.0638641	0.0156981	0.0581439	0.04805	0.441689	6.3	0.00314306	0.0400893	0.130206	1.39697
O00160	MYO1F	Unconventional myosin-If OS=Homo sapiens OX=9606 GN=MYO1F PE=1 SV=3	-0.0091067	0.0091067	-0.0193003	-0.04161	-0.0259381	-0.0420638	-0.0672093	-0.0598709	-0.0580205	-0.0670914	-0.0563168	-0.0626189	-0.0480204	-0.018759	-0.0392308	-0.0153724	0	0.0382324	0.0108937	0.0517292	0.0169978	-0.00469141	0.00839839	0.0158369	0.616067	6.1105	0.003147	0.0400893	-0.0487312	1.39697
Q8NFH3	NUP43	Nucleoporin Nup43 OS=Homo sapiens OX=9606 GN=NUP43 PE=1 SV=1	0.017784	-0.017784	0.040671	-0.0191614	0.0289917	0.0536194	0.0671988	-0.0061784	0.0440198	-0.00191762	0.0528046	0.0305828	0.0175159	0.0638138	0.118079	0.0768778	0	-0.0316414	-0.0612989	0.0193704	0.011238	-0.0484907	-0.0199044	-0.0206587	0.433756	3.3	0.00315221	0.0400893	0.079853	1.39697
Q06587	RING1	E3 ubiquitin-protein ligase RING1 OS=Homo sapiens OX=9606 GN=RING1 PE=1 SV=2	-0.0497869	0.0497869	0.023557	0.0477926	0.00974964	0.0773888	0.0220632	0.0656445	0.0334338	0.0922124	0.0693902	0.0754406	0.0301436	0.0662651	0.079493	0.124705	0	0.0396047	-0.012347	0.0828936	0.0039882	0.0669154	0.00910774	-0.0101521	0.425628	5.57555	0.00317217	0.0402712	0.128778	1.395
K7EN73	ALDH3A2	Isoform of P51648, Aldehyde dehydrogenase family 3 member A2 (Fragment) OS=Homo sapiens OX=9606 GN=ALDH3A2 PE=1 SV=8	-0.0316746	0.0316746	0.0303192	-0.0424707	-0.0136837	-0.0479404	0.0205338	-0.0102539	0.0699826	-0.00271677	0.0656151	0.123069	0.106546	0.0184147	0.197242	0.0807049	0	0.110085	0.0152216	-0.0634762	0.0345286	0.0522665	-0.0238937	-0.0977712	0.565782	3.8	0.00318133	0.0403157	0.112665	1.39453
Q9UJU6	DBNL	Drebrin-like protein OS=Homo sapiens OX=9606 GN=DBNL PE=1 SV=1	0.0968879	-0.0968879	-0.193326	-0.217097	-0.162174	-0.207811	-0.275643	-0.184595	-0.0881684	-0.128843	-0.203228	-0.206197	-0.208603	-0.146863	-0.270484	-0.169937	0	-0.149563	-0.147559	-0.120398	-0.102473	-0.135512	-0.152109	-0.152624	0.61512	6.3	0.00319973	0.0403383	-0.190255	1.39428
P20645	M6PR	Cation-dependent mannose-6-phosphate receptor OS=Homo sapiens OX=9606 GN=M6PR PE=1 SV=1	-0.00779644	0.00779644	0.00374215	0.0165971	-0.00287695	0.046365	0.0258763	-0.0108038	-0.0424884	0.0232415	0.00724485	-0.047389	-0.0141307	-0.0043716	-0.0660331	-0.114498	0	0.0792919	0.20727	0.0548567	0.00856586	0.116313	0.0763238	0.117912	0.615098	3.15598	0.00320098	0.0403383	-0.0914176	1.39428
Q8N5M1	ATPAF2	ATP synthase mitochondrial F1 complex assembly factor 2 OS=Homo sapiens OX=9606 GN=ATPAF2 PE=1 SV=1	-0.0339911	0.0339911	-0.0352583	0.060852	0.0828047	0.0547739	-0.0116752	0.0339575	0.0302774	-0.0316013	-0.0401543	0.0509748	0.105965	0.11498	0.126476	0.152125	0	-0.0660342	0.0400745	-0.0025089	-0.0511371	-0.0378107	-0.0245004	-0.0650943	0.615033	3.58327	0.00320464	0.0403383	0.125386	1.39428
Q7RTR2	NLRC3	NLR family CARD domain-containing protein 3 OS=Homo sapiens OX=9606 GN=NLRC3 PE=1 SV=2	-0.0133927	0.0133927	0.0563543	-0.081475	0.0588889	-0.0518173	0.0289704	0.0109924	-0.042118	-0.0105289	-0.0964485	-0.0490823	-0.0854682	-0.0998763	-0.0821275	-0.230011	0	0.0360324	0.00294472	-0.0581121	-0.047363	-0.000198112	-0.0530519	0.0275227	0.615013	3.63935	0.00320577	0.0403383	-0.154632	1.39428
P21796	VDAC1	Voltage-dependent anion-selective channel protein 1 OS=Homo sapiens OX=9606 GN=VDAC1 PE=1 SV=2	-0.0347653	0.0347653	-0.26184	-0.0823542	-0.0274464	-0.0282565	-0.016269	-0.129919	-0.0986097	0.0109601	-0.211495	-0.133028	-0.256438	-0.101941	-0.20592	-0.247935	0	0.0358958	0.141361	-0.0868525	-0.0616123	-0.0455902	0.0259955	0.0984366	0.460192	4.06775	0.00322466	0.0405045	-0.150254	1.3925
P84077	ARF1	ADP-ribosylation factor 1 OS=Homo sapiens OX=9606 GN=ARF1 PE=1 SV=2	-0.00349004	0.00349004	0.0460296	0.0012587	-0.0194598	0.0247966	-0.0113729	0.000448492	0.0209963	0.0451649	0.0145152	0.0553318	0.0273486	0.0432992	0.0635547	0.0431454	0	-0.0179476	0.0343234	0.0122983	-0.00789829	0.00713793	0.00841063	0.0359443	0.524636	4.58625	0.00327975	0.041124	0.037033	1.38591
Q16773	KYAT1	Kynurenine--oxoglutarate transaminase 1 OS=Homo sapiens OX=9606 GN=KYAT1 PE=1 SV=1	0.0158411	-0.0158411	0.0464992	-0.00330105	0.0305663	0.0276185	0.107467	0.0513743	0.0349714	0.0107396	-0.0063626	0.0180218	0.0813162	0.0480011	0.129092	0.129758	0	0.0886074	0.109341	0.0834224	0.0584241	0.0754636	0.0635758	0.0992419	0.602479	3.50118	0.00333447	0.0416052	0.10674	1.38085
Q7Z6J0	SH3RF1	E3 ubiquitin-protein ligase SH3RF1 OS=Homo sapiens OX=9606 GN=SH3RF1 PE=1 SV=2	-0.00270641	0.00270641	-0.0536558	0.0317788	-0.00868433	0.0407276	-0.0056637	-0.0477775	-0.0847277	-0.0605811	0.0674764	0.204302	0.0987976	0.0182756	0.098606	0.188419	0	0.255026	0.0867429	0.0934768	0.13574	0.227691	0.224848	0.167065	0.612715	4.23949	0.00333703	0.0416052	0.128591	1.38085
Q9HBG7	LY9	T-lymphocyte surface antigen Ly-9 OS=Homo sapiens OX=9606 GN=LY9 PE=1 SV=3	0.0188701	-0.0188701	0.130734	0.0187838	0.113113	0.114195	0.169022	0.0866488	0.115297	0.0989312	0.0904588	0.0425497	0.162787	0.078483	0.142811	0.0848669	0	0.0803163	0.0637121	0.126378	0.0502342	0.0933495	0.326596	0.152995	0.612626	6.04013	0.0033422	0.0416052	0.108264	1.38085
Q9NZZ3	CHMP5	Charged multivesicular body protein 5 OS=Homo sapiens OX=9606 GN=CHMP5 PE=1 SV=1	0.00473148	-0.00473148	0.0618362	0.0155053	0.00795173	0.0200197	0.0149685	-0.0317185	-0.00208931	0.0250615	0.0155366	0.0841379	0.0643426	0.0809083	0.0598265	0.0839843	0	0.0214487	0.0111816	0.0327659	0.0118881	4.42352e-05	0.0118994	0.0317012	0.612534	4.07146	0.00334752	0.0416052	0.0635359	1.38085
Q7Z3D6-2	DGLUCY	Isoform of Q7Z3D6, Isoform 2 of D-glutamate cyclase, mitochondrial OS=Homo sapiens OX=9606 GN=DGLUCY PE=1 SV=2	0.00618649	-0.00618649	-0.029637	-0.0428009	-0.054619	-0.101815	-0.0651946	-0.0560791	-0.0321778	-0.0641701	-0.0647873	-0.0184611	-0.0617388	-0.0693822	-0.0623118	-0.0214218	0	0.038646	0.0545442	0.138199	0.0496535	0.0513967	0.0818882	-0.055149	0.612456	6.03023	0.00335208	0.0416052	-0.0560132	1.38085
Q5T8J1	CCND3	Isoform of P30281, G1/S-specific cyclin-D3 OS=Homo sapiens OX=9606 GN=CCND3 PE=1 SV=1	-0.0692993	0.0692993	-0.00685457	-0.0231057	-0.0125359	-0.0138195	0.130038	0.0357767	0.00615549	0.0323022	0.0912261	0.19221	0.170979	0.0267702	0.169907	0.125016	0	-0.0201945	-0.0406772	-0.113392	0.0131617	-0.149897	-0.0989776	-0.124411	0.491455	4.39406	0.00335886	0.0416052	0.118427	1.38085
Q9Y3Y4-2	PYGO1	Isoform of Q9Y3Y4, Isoform 2 of Pygopus homolog 1 OS=Homo sapiens OX=9606 GN=PYGO1 PE=1 SV=2	0.0238329	-0.0238329	0.120747	-0.0388034	0.107871	0.0772589	0.165262	0.0724382	-0.0338625	0.0515286	0.121474	0.14508	0.124196	0.0810706	0.225075	0.109105	0	0.110813	-0.0189189	-0.0619692	0.116789	0.0503232	-0.0441636	0.00134361	0.348313	4.16975	0.00335903	0.0416052	0.0917725	1.38085
A6NK58	LIPT2	Putative lipoyltransferase 2, mitochondrial OS=Homo sapiens OX=9606 GN=LIPT2 PE=1 SV=1	0.0378659	-0.0378659	0.0565507	0.0269954	0.0751838	0.0125119	0.0652659	0.0798049	-0.0288554	-0.0039212	0.0779804	0.0532901	0.119932	0.0568723	0.145521	0.114847	NA	NA	NA	NA	NA	NA	NA	NA	0.489927	3.65726	0.0033676	0.041639	0.10354	1.3805
Q6PJF5-2	RHBDF2	Isoform of Q6PJF5, Isoform 2 of Inactive rhomboid protein 2 OS=Homo sapiens OX=9606 GN=RHBDF2 PE=1 SV=2	0.0718186	-0.0718186	0.00242965	0.0237567	0.0472852	-0.007261	-0.058521	-0.049677	-0.0157385	-0.0197616	0.0107455	0.116148	0.0584956	0.135143	0.151518	0.19543	0	-0.0201043	0.0847486	0.0736844	0.0826767	0.0821785	0.123382	-0.0311563	0.611834	3.62067	0.00338853	0.0418186	0.175721	1.37863
Q96GM8	TOE1	Target of EGR1 protein 1 OS=Homo sapiens OX=9606 GN=TOE1 PE=1 SV=1	0.0329642	-0.0329642	-0.0662512	-0.0557334	-0.0173429	-0.0314886	-0.0700445	-0.016758	-0.0408651	-0.0938289	-0.0349316	-0.0984042	-0.0233172	-0.0732817	-0.0741272	-0.105147	0	0.0318637	-0.0117295	-0.0340105	0.00190023	0.032779	-0.0686203	0.00344347	0.427379	6.3	0.00339387	0.0418186	-0.114839	1.37863
O00716	E2F3	Transcription factor E2F3 OS=Homo sapiens OX=9606 GN=E2F3 PE=1 SV=1	-0.0729728	0.0729728	0.10449	0.033664	0.010975	0.245867	-0.0897891	-0.0371754	0.0857029	0.227172	0.227348	0.301498	0.10707	0.218495	0.193999	0.346434	NA	NA	NA	NA	NA	NA	NA	NA	0.536309	4.5495	0.00340217	0.0418227	0.205677	1.37859
Q13474-2	DRP2	Isoform of Q13474, Isoform 2 of Dystrophin-related protein 2 OS=Homo sapiens OX=9606 GN=DRP2 PE=2 SV=2	-0.0278891	0.0278891	0.134924	0.0655524	-0.0386974	0.0564276	0.222088	0.106792	0.0457792	0.132665	0.124018	0.0982511	0.158758	0.0483178	0.162193	0.15548	0	0.0609961	0.114292	0.0783034	0.0872196	0.0721588	0.0941836	0.109523	0.433867	6.3	0.00340595	0.0418227	0.189959	1.37859
H0Y5F2	C1orf167	Isoform of Q5SNV9, Uncharacterized protein C1orf167 (Fragment) OS=Homo sapiens OX=9606 GN=C1orf167 PE=1 SV=1	0.156636	-0.156636	-0.284627	-0.201255	-0.211457	-0.238598	-0.275075	-0.237044	-0.181933	-0.191328	-0.266589	-0.265402	-0.324099	-0.308866	-0.264369	-0.177798	0	-0.0911715	-0.117487	0.00789161	-0.21127	-0.246292	0.164443	0.162007	0.595545	6.3	0.00341632	0.0418778	-0.245219	1.37802
Q86YS6	RAB43	Ras-related protein Rab-43 OS=Homo sapiens OX=9606 GN=RAB43 PE=1 SV=1	0.00482717	-0.00482717	0.028193	0.0493422	-0.00069639	0.0051014	0.0318193	0.0534158	-0.0790216	0.0228752	0.0993779	0.155397	0.095284	0.0900568	0.0764214	0.0548241	0	-0.00410912	-0.0597221	0.0251645	-0.0286698	-0.0427514	-0.0396021	-0.0235388	0.611101	4.2583	0.00343187	0.0419962	0.0857364	1.37679
P53803	POLR2K	DNA-directed RNA polymerases I, II, and III subunit RPABC4 OS=Homo sapiens OX=9606 GN=POLR2K PE=1 SV=1	0.0201259	-0.0201259	0.0484117	-0.00318785	-0.01576	0.00152373	0.00900632	0.0158656	-0.0641219	0.0541125	-0.017856	0.0536946	-0.0322984	-0.0785144	-0.0797906	-0.136333	0	-0.192656	-0.266531	-0.414676	-0.258153	-0.167128	-0.279409	-0.311234	0.610497	3.53042	0.00346797	0.0422743	-0.113899	1.37392
A8K727	PLEKHA2	Isoform of Q9HB19, Pleckstrin homology domain-containing family A member 2 OS=Homo sapiens OX=9606 GN=PLEKHA2 PE=1 SV=1	-0.0164939	0.0164939	-0.0122219	-0.0125508	0.00324448	-0.0118188	0.00532185	-0.0155694	-0.0511504	0.0188706	-0.0681403	-0.075557	0.0196036	-0.0628536	-0.119597	-0.148197	0	0.00748876	0.0111253	-0.0125007	-0.0130788	-0.0120264	0.0344956	-0.0175037	0.610455	3.20638	0.00347051	0.0422743	-0.108698	1.37392
F5H760	MGST1	Isoform of P10620, Glutathione transferase (Fragment) OS=Homo sapiens OX=9606 GN=MGST1 PE=1 SV=1	0.00593651	-0.00593651	-0.185909	-0.198966	0.220398	-0.0533751	-0.484924	-0.183414	-0.308895	0.141011	-0.200613	-0.180721	-0.659311	-0.229827	-0.459225	-0.592143	NA	NA	NA	NA	NA	NA	NA	NA	0.487032	3.46735	0.0034724	0.0422743	-0.482394	1.37392
A2RUC4	TYW5	tRNA wybutosine-synthesizing protein 5 OS=Homo sapiens OX=9606 GN=TYW5 PE=1 SV=1	-0.00890771	0.00890771	0.0572666	-0.0101158	0.0787107	0.0120536	0.0346405	0.013277	-0.00522917	0.014422	0.0702662	0.0442154	0.0147438	0.061967	0.104616	0.103523	0	-0.131986	-0.139463	-0.149122	-0.0885474	-0.0729083	-0.194129	-0.180219	0.421392	4.05375	0.00348169	0.042315	0.0549646	1.37351
O00330	PDHX	Pyruvate dehydrogenase protein X component, mitochondrial OS=Homo sapiens OX=9606 GN=PDHX PE=1 SV=3	-0.0255408	0.0255408	-0.0308904	0.00621321	0.0136978	0.0403929	-0.048253	0.0160334	-0.0459761	-0.0313427	0.00199144	0.0170426	-0.00984479	0.0358239	0.0764586	0.138183	0	-0.0192003	-0.0857286	0.0503297	-0.0496315	-0.127662	-0.0072194	0.0536254	0.609996	3.16219	0.00349818	0.042443	0.111775	1.37219
H7BXH2	PPP6R3	Isoform of Q5H9R7, Serine/threonine-protein phosphatase 6 regulatory subunit 3 OS=Homo sapiens OX=9606 GN=PPP6R3 PE=1 SV=1	0.00218502	-0.00218502	0.060594	0.0396875	0.0184563	0.0341862	0.00977613	0.00746263	0.0380903	0.0366716	0.0531783	0.0868971	0.0394142	0.0336267	0.0565534	0.0349575	0	0.00851035	0.0301157	0.0542788	0.0292045	-0.00451423	0.0219181	0.0115314	0.419865	4.54383	0.00351155	0.042481	0.0337555	1.37181
A0A7I2V3V3	KIF11	Isoform of P52732, Kinesin-like protein KIF11 OS=Homo sapiens OX=9606 GN=KIF11 PE=4 SV=1	0.106389	-0.106389	0.187348	0.11523	-0.0157066	0.0561284	0.0598558	0.199832	0.141787	0.0136921	0.122889	0.274452	0.142508	0.0827856	0.330201	0.494614	NA	NA	NA	NA	NA	NA	NA	NA	0.52981	3.14325	0.00351324	0.042481	0.328596	1.37181
P31323	PRKAR2B	cAMP-dependent protein kinase type II-beta regulatory subunit OS=Homo sapiens OX=9606 GN=PRKAR2B PE=1 SV=3	-0.0260064	0.0260064	-0.0231202	0.0191688	-0.025346	-0.024088	-0.0265498	-0.0420667	0.0116232	-0.0301561	-0.030539	-0.00777641	-0.0477136	-0.0358439	-0.0886303	-0.0600287	0	0.0267504	0.00325886	0.0488333	0.0430122	0.0263314	0.0396244	0.0280532	0.504611	3.26639	0.00352575	0.04256	-0.0629832	1.371
Q96HQ2	CDKN2AIPNL	CDKN2AIP N-terminal-like protein OS=Homo sapiens OX=9606 GN=CDKN2AIPNL PE=1 SV=1	-0.0120357	0.0120357	0.102665	0.0845458	0.0106413	0.112763	0.165652	0.0158241	0.00129485	0.0374858	0.0874814	0.105327	0.115813	0.102268	0.127498	0.127914	0	0.0752309	0.0242646	0.166252	0.0291526	0.0922025	0.0728217	0.0575757	0.331465	4.0432	0.00355875	0.0428857	0.0741379	1.36769
Q9NWZ8	GEMIN8	Gem-associated protein 8 OS=Homo sapiens OX=9606 GN=GEMIN8 PE=1 SV=1	-0.128695	0.128695	0.138479	0.0960462	0.0306414	0.0726256	0.281503	0.0736787	0.071126	0.216261	0.273005	0.163822	0.0895885	0.170081	0.316599	0.208417	0	-0.0141126	-0.0187871	0.104122	0.00406212	0.0366247	0.10155	0.0118817	0.419975	5.91377	0.00359525	0.0432523	0.343807	1.36399
P61923	COPZ1	Coatomer subunit zeta-1 OS=Homo sapiens OX=9606 GN=COPZ1 PE=1 SV=1	-0.0291081	0.0291081	0.0745137	0.0309858	0.0309192	-0.000515737	0.0492773	-0.00759413	5.87555e-05	0.00643532	0.0483811	0.0140836	0.07367	0.0513729	0.126406	0.100815	0	0.081797	0.0780292	0.116976	0.0623597	0.0728549	0.0592438	0.0787665	0.607999	3.43396	0.00362062	0.0434841	0.097824	1.36167
Q5T321	NBEA	Isoform of Q8NFP9, Neurobeachin OS=Homo sapiens OX=9606 GN=NBEA PE=1 SV=1	0.0134846	-0.0134846	0.0180564	-0.031365	-0.0393806	-0.0204857	-0.0350846	0.026867	0.0134467	0.0178047	-0.0874307	-0.0957458	-0.013043	-0.108532	-0.129226	-0.0511875	0	0.076507	0.00875873	-0.0243991	-0.0820305	0.0187683	-0.116136	-0.0687412	0.607797	4.24657	0.00363322	0.043562	-0.0768371	1.36089
P36915	GNL1	Guanine nucleotide-binding protein-like 1 OS=Homo sapiens OX=9606 GN=GNL1 PE=1 SV=2	-0.00758779	0.00758779	-0.046356	-0.0226753	-0.0222965	-0.0588799	-0.0325448	-0.0642123	-0.042934	-0.0776632	-0.054918	-0.0585757	-0.0792031	-0.0135979	-0.101651	-0.0152491	0	0.0595338	0.0326957	0.0373966	0.0240462	0.0103827	-0.00185993	0.00742206	0.497048	6.3	0.00366083	0.0436883	-0.0637451	1.35964
Q9H425	C1orf198	Uncharacterized protein C1orf198 OS=Homo sapiens OX=9606 GN=C1orf198 PE=1 SV=1	0.0212363	-0.0212363	0.0310232	0.0270053	0.0663287	-0.0610262	0.0133383	0.0459847	0.0541938	0.0688593	-0.00647477	0.112325	0.154005	0.0863401	0.0398046	0.186159	0	-0.00490437	-0.00121374	-0.0790743	-0.0136106	0.0249034	0.105298	0.0844079	0.471685	4.03391	0.00366202	0.0436883	0.117226	1.35964
A0A3B3ITX4	readthrough,	readthrough, Uncharacterized protein OS=Homo sapiens OX=9606 PE=3 SV=1	-0.0528586	0.0528586	-0.253753	-0.102635	-0.068692	-0.0528117	0.0238725	-0.153674	-0.100427	0.0317219	-0.271319	-0.177083	-0.312092	-0.0963618	-0.271162	-0.24646	0	0.143919	0.435579	-0.0846491	-0.0127377	0.0958844	0.176907	0.429764	0.495059	4.15342	0.00366216	0.0436883	-0.175314	1.35964
A0A5F9ZHW5	ATXN2	Isoform of Q99700, Ataxin-2 OS=Homo sapiens OX=9606 GN=ATXN2 PE=1 SV=1	0.00667704	-0.00667704	0.0589322	0.0296733	0.0129641	0.00282345	0.0294431	0.0274383	0.0470511	0.0216574	0.0556453	0.00761707	0.0144152	0.0637848	0.0578167	0.0478773	0	0.0471737	0.00224736	0.0273039	0.0639642	0.0349143	0.0541233	0.0452334	0.412479	5.87037	0.00374626	0.0444302	0.0696259	1.35232
H3BNX8	COX5A	Isoform of P20674, Cytochrome c oxidase polypeptide Va OS=Homo sapiens OX=9606 GN=COX5A PE=1 SV=1	-0.00622564	0.00622564	-0.0379511	-0.0583844	-0.00876586	0.0239429	-0.014059	0.0365341	0.0223693	0.0565195	-0.00633287	0.0552953	0.0154899	0.0805171	0.0614009	0.0812923	0	0.19277	0.309742	0.297976	0.177154	0.0940744	0.301093	0.34543	0.522732	4.12296	0.00374747	0.0444302	0.0777943	1.35232
O95628	CNOT4	CCR4-NOT transcription complex subunit 4 OS=Homo sapiens OX=9606 GN=CNOT4 PE=1 SV=3	-0.0343568	0.0343568	-0.0288769	0.0201511	-0.00106239	0.0636632	-0.0389122	-0.036331	-0.0423276	-0.0658731	-0.0781703	-0.00391394	-0.0800218	-0.0244052	-0.140504	-0.0789648	0	0.0823517	0.0675597	0.0866497	0.0801878	0.0593144	0.113937	0.0524699	0.505224	3.42379	0.00375223	0.0444302	-0.102677	1.35232
Q96L91	EP400	E1A-binding protein p400 OS=Homo sapiens OX=9606 GN=EP400 PE=1 SV=4	-0.00234028	0.00234028	0.0057799	0.00982257	-0.0101428	0.00835803	-0.034878	0.015137	-0.0567509	-0.0127109	-0.00383427	-0.055036	-0.0221391	-0.0216584	-0.0376695	-0.0516935	0	-0.0438693	-0.0613546	-0.074182	-0.0670815	-0.0720776	-0.0815133	-0.0511027	0.516857	4.96618	0.00375394	0.0444302	-0.0344151	1.35232
H0Y967	GRK6	Isoform of P43250, G protein-coupled receptor kinase 6 (Fragment) OS=Homo sapiens OX=9606 GN=GRK6 PE=4 SV=1	-0.00843931	0.00843931	0.00338613	-0.0744146	0.0294131	-0.0490879	0.0641372	-0.0195523	0.0863614	0.043174	0.0402452	0.0309101	0.105289	0.0431739	0.0949393	0.0535813	0	0.00849455	0.0784711	0.0952842	0.113535	0.097015	0.0332246	0.0182621	0.555121	4.99143	0.00375554	0.0444302	0.0735491	1.35232
Q9BY77	POLDIP3	Polymerase delta-interacting protein 3 OS=Homo sapiens OX=9606 GN=POLDIP3 PE=1 SV=2	-0.00283457	0.00283457	-0.0202927	0.0159059	-0.0182024	-0.0182343	-0.0111912	0.0138837	-0.0517511	-0.00381198	-0.0212575	-0.0721701	-0.0265015	-0.0335025	-0.0452879	-0.0312322	0	-0.0475441	-0.0609993	-0.0227838	-0.0151864	-0.0376395	-0.0521804	-0.00786174	0.516627	4.56391	0.00378258	0.0446354	-0.0345135	1.35032
Q4TT34	NME4	Isoform of O00746, Nucleoside diphosphate kinase OS=Homo sapiens OX=9606 GN=NME4 PE=1 SV=1	0.0197936	-0.0197936	-0.00817884	-0.0278218	-0.0515232	-0.0422176	0.00666103	-0.00417198	-0.0011075	-0.0245493	0.0402737	0.0813306	0.042056	0.014478	0.0943036	0.0293679	NA	NA	NA	NA	NA	NA	NA	NA	0.6054	4.32107	0.00378542	0.0446354	0.0632439	1.35032
Q13126	MTAP	S-methyl-5'-thioadenosine phosphorylase OS=Homo sapiens OX=9606 GN=MTAP PE=1 SV=2	0.0350173	-0.0350173	0.0042739	-0.0564556	-0.00684796	-0.0212447	-0.0297431	-0.0373304	-0.0318516	-0.0604606	-0.0413541	-0.103407	-0.0580233	-0.0396528	-0.0706609	-0.0398233	0	-0.00660029	-0.0229029	-0.0407654	0.00779318	-0.0614463	-0.0704874	-0.0964994	0.436798	5.2376	0.0037974	0.0447026	-0.0581214	1.34967
Q9Y2A7	NCKAP1	Nck-associated protein 1 OS=Homo sapiens OX=9606 GN=NCKAP1 PE=1 SV=1	0.0214101	-0.0214101	0.109989	0.10062	0.0657493	0.0794811	-0.0260162	0.0555505	0.105074	0.0473684	0.117747	0.112089	0.119972	0.0162044	0.175658	0.118255	0	0.0383321	0.00684254	0.0616465	-0.0270635	-0.0228226	0.0202845	0.0167396	0.333883	4.52835	0.00382551	0.0449592	0.0714514	1.34718
P51148	RAB5C	Ras-related protein Rab-5C OS=Homo sapiens OX=9606 GN=RAB5C PE=1 SV=2	-0.00267912	0.00267912	0.0615253	0.0680104	0.029656	0.0169903	0.00583708	-0.0299785	0.0418555	-0.014405	0.0536415	0.0684949	0.0724183	0.0594847	0.0816337	0.135142	0	0.0500219	0.0468376	0.0875359	0.0368853	0.00977866	0.0164611	0.039426	0.580687	3.65487	0.00383749	0.0450257	0.0903894	1.34654
Q9NX24	NHP2	H/ACA ribonucleoprotein complex subunit 2 OS=Homo sapiens OX=9606 GN=NHP2 PE=1 SV=1	0.0193428	-0.0193428	-0.0542419	-0.0912695	-0.0692526	-0.0100021	-0.0972437	-0.0623697	0.0426704	-0.0660769	-0.0465393	-0.0835796	-0.131907	-0.0828026	-0.0867728	-0.121884	0	-0.152669	-0.169878	-0.29622	-0.132523	-0.0917815	-0.177606	-0.19962	0.379231	3.9864	0.00386129	0.0452305	-0.0718628	1.34457
A0AV96	RBM47	RNA-binding protein 47 OS=Homo sapiens OX=9606 GN=RBM47 PE=1 SV=2	-0.0547833	0.0547833	-0.0285634	-0.0703547	-0.0287359	-0.0769548	-0.0663077	-0.10296	-0.148797	-0.075879	-0.0912145	-0.0563362	-0.0587844	-0.110301	-0.0986951	-0.0734193	0	0.0197692	0.00446249	0.054648	0.0504829	0.0148981	0.0362382	-0.0111484	0.50127	6.00779	0.00387658	0.045335	-0.093011	1.34357
Q03252	LMNB2	Lamin-B2 OS=Homo sapiens OX=9606 GN=LMNB2 PE=1 SV=4	-0.0152033	0.0152033	-0.0036027	0.0116506	-0.0126648	0.014873	0.0334082	0.0127665	-0.0129622	0.0194793	-0.055254	-0.0155524	-0.0329343	0.0197091	-0.097452	-0.0722852	0	-0.0889354	-0.0153993	-0.0577949	-0.0807949	-0.0436238	-0.106815	-0.0466541	0.603672	3.14478	0.00389846	0.0454425	-0.0842551	1.34254
Q93038	TNFRSF25	Tumor necrosis factor receptor superfamily member 25 OS=Homo sapiens OX=9606 GN=TNFRSF25 PE=1 SV=2	0.0398893	-0.0398893	-0.072668	0.0259723	-0.0462459	-0.0606137	-0.0890338	-0.0154465	-0.122458	-0.0766024	-0.159019	-0.0696079	-0.138691	-0.0383184	-0.104593	-0.0506109	0	-0.179021	-0.0649715	-0.065436	-0.114706	-0.0267197	-0.120341	-0.0852448	0.471741	5.50932	0.00389853	0.0454425	-0.0955354	1.34254
Q8NBZ7	UXS1	UDP-glucuronic acid decarboxylase 1 OS=Homo sapiens OX=9606 GN=UXS1 PE=1 SV=1	0.0629253	-0.0629253	-0.0828852	-0.112286	-0.0570048	-0.117827	-0.0967836	-0.102584	-0.00743312	-0.119318	-0.0441397	-0.106333	-0.2116	-0.152305	-0.160622	-0.0876953	0	-0.0027904	-0.0459464	-0.0568905	-0.0311271	-0.0556763	-0.099661	-0.0976587	0.418973	6.3	0.00391614	0.0455731	-0.204104	1.34129
Q9C000	NLRP1	NACHT, LRR and PYD domains-containing protein 1 OS=Homo sapiens OX=9606 GN=NLRP1 PE=1 SV=1	-0.0121657	0.0121657	-0.0823589	-0.0284544	-0.103163	-0.0841094	-0.0346165	-0.0428751	-0.139879	-0.0445183	0.00455958	-0.0974194	-0.102629	-0.0673584	-0.0772428	-0.173084	0	-0.0742996	-0.0658186	-0.0609324	-0.119746	-0.0572321	-0.0839777	-0.1189	0.412675	6.3	0.0039239	0.0455889	-0.152931	1.34114
Q3ZCQ8-2	TIMM50	Isoform of Q3ZCQ8, Isoform 2 of Mitochondrial import inner membrane translocase subunit TIM50 OS=Homo sapiens OX=9606 GN=TIMM50 PE=1 SV=2	0.013418	-0.013418	-0.0414755	-0.098803	-0.0906992	-0.0338801	-0.0258272	-0.042248	-0.0463377	-0.052457	-0.0754387	-0.067613	-0.124807	-0.0485096	-0.117866	-0.0319189	0	-0.02725	-0.0179128	-0.129434	-0.00420784	-0.0424092	-0.0462879	0.0152555	0.430651	6.3	0.00393465	0.0456394	-0.092006	1.34066
Q12996	CSTF3	Cleavage stimulation factor subunit 3 OS=Homo sapiens OX=9606 GN=CSTF3 PE=1 SV=1	-0.00297512	0.00297512	-0.0219166	-0.0261911	-0.0634625	-0.0473512	-0.0292289	-0.0249222	-0.0434736	-0.035631	-0.0424174	-0.0623199	-0.0241075	-0.0496221	-0.0335654	-0.007083	0	0.0170072	-0.0106934	-0.00192787	0.00767602	-0.0216523	0.00195205	0.0162414	0.60271	6.02517	0.00396267	0.0458675	-0.0385988	1.3385
P67936	TPM4	Tropomyosin alpha-4 chain OS=Homo sapiens OX=9606 GN=TPM4 PE=1 SV=3	0.0260811	-0.0260811	0.009933	-0.000546518	0.017708	0.00331467	0.0463635	-0.00578008	0.0228875	-0.0212286	0.0431264	0.0688071	0.0627888	0.0294686	0.0532463	0.0525543	0	-0.0358318	-0.0572484	-0.0130504	-0.0384945	-0.0331038	-0.00808341	-0.00291581	0.547926	4.25673	0.00397144	0.0458675	0.0457108	1.3385
Q16644	MAPKAPK3	MAP kinase-activated protein kinase 3 OS=Homo sapiens OX=9606 GN=MAPKAPK3 PE=1 SV=1	0.000378219	-0.000378219	-0.0290057	0.0271885	-0.0548674	-0.0473061	-0.181965	-0.0470566	-0.075141	-0.00435059	-0.00500645	-0.0348572	-0.145092	-0.0626588	-0.147463	-0.128779	0	-0.0123457	-0.00382069	0.0257114	0.0232284	-0.0446443	-0.0270873	-0.0450841	0.416089	3.80757	0.00397364	0.0458675	-0.137895	1.3385
Q8TED0	UTP15	U3 small nucleolar RNA-associated protein 15 homolog OS=Homo sapiens OX=9606 GN=UTP15 PE=1 SV=3	-0.0307754	0.0307754	0.0521627	0.0793746	0.00902774	0.0356432	0.0412169	0.051796	0.00977432	0.0468198	0.049067	0.049142	0.0670902	0.0644856	0.13417	0.0460076	NA	NA	NA	NA	NA	NA	NA	NA	0.406694	4.84801	0.00398158	0.0458848	0.1124	1.33833
A6NLN1	PTBP1	Isoform of P26599, Polypyrimidine tract-binding protein 1 OS=Homo sapiens OX=9606 GN=PTBP1 PE=1 SV=4	-0.0288114	0.0288114	-0.127297	-0.0677998	-0.100569	-0.0203546	-0.0147374	-0.0494287	-0.108683	-0.109102	-0.254124	-0.12129	-0.109397	-0.121517	-0.133413	-0.0570997	0	-0.00624768	0.00766271	0.0238918	-0.013217	0.030952	0.0900307	0.112446	0.448741	4.57719	0.00400916	0.046128	-0.0947921	1.33604
P23258	TUBG1	Tubulin gamma-1 chain OS=Homo sapiens OX=9606 GN=TUBG1 PE=1 SV=2	0.0234431	-0.0234431	-0.0411341	-0.00424837	-0.00230633	-0.0492432	-0.019199	-0.0270481	-0.00194022	-0.0488802	-0.0562956	-0.0575608	-0.0356016	-0.0454335	-0.0295994	-0.0571627	0	0.00723158	-0.0298853	-0.0135462	-0.000554804	-0.0163016	-0.0572647	-0.0121428	0.355921	4.48974	0.00403437	0.0463432	-0.0326251	1.33401
Q6ZSJ8	C1orf122	Uncharacterized protein C1orf122 OS=Homo sapiens OX=9606 GN=C1orf122 PE=4 SV=2	-0.0123113	0.0123113	0.0211987	0.00596372	0.0235995	0.0423148	0.0931888	0.0590837	0.013409	0.026382	0.106814	0.0261094	0.0237859	0.0188392	0.152626	0.085895	0	0.0594181	0.297751	0.0646491	0.0855908	-0.106679	0.11565	0.157891	0.414286	3.45776	0.00407923	0.0467284	0.102079	1.33042
P09972	ALDOC	Fructose-bisphosphate aldolase C OS=Homo sapiens OX=9606 GN=ALDOC PE=1 SV=2	0.0090754	-0.0090754	0.0722855	0.00704697	0.0541106	0.0210118	0.0969104	0.0254772	0.0280046	0.000719446	0.0342459	0.0339928	0.081928	0.0593295	0.0901779	0.0570021	0	-0.00729799	-0.00597126	-0.0280437	-0.00396157	0.0139288	-0.00683812	0.00488978	0.404532	5.12879	0.00408455	0.0467284	0.100156	1.33042
H0YBI6	TXNRD3	Isoform of Q86VQ6, Thioredoxin-disulfide reductase OS=Homo sapiens OX=9606 GN=TXNRD3 PE=1 SV=3	0.106471	-0.106471	0.090891	0.211371	0.150398	0.162236	0.217473	0.165345	0.182027	0.187393	0.162584	0.178816	0.388186	0.163748	0.175529	0.128985	0	-0.00550815	-0.139451	0.125042	0.0323541	-0.0281989	0.189357	-0.00390339	0.519947	6.3	0.00408758	0.0467284	0.20667	1.33042
P04085	PDGFA	Platelet-derived growth factor subunit A OS=Homo sapiens OX=9606 GN=PDGFA PE=1 SV=1	0.0505859	-0.0505859	0.0131959	-0.0572191	0.0263607	-0.00144661	-0.0633054	-0.0338024	0.117445	-0.00932175	0.0679092	0.0447263	0.140932	0.0510136	0.160706	0.17947	NA	NA	NA	NA	NA	NA	NA	NA	0.5506	4.5332	0.00410944	0.0468359	0.119085	1.32942
Q8WWI1	LMO7	LIM domain only protein 7 OS=Homo sapiens OX=9606 GN=LMO7 PE=1 SV=3	0.00110895	-0.00110895	0.0220084	-0.00172765	-0.0139931	-0.0176793	0.010167	0.013879	0.0227749	0.00796687	0.0135077	0.0288328	0.0481389	0.00341654	0.0230728	0.0452939	0	-0.00562427	-0.0101718	-0.0429442	0.00622313	0.0188363	0.00714695	0.028743	0.503796	4.36775	0.00412493	0.0468359	0.0322457	1.32942
Q9P287	BCCIP	BRCA2 and CDKN1A-interacting protein OS=Homo sapiens OX=9606 GN=BCCIP PE=1 SV=1	-0.0152782	0.0152782	0.0240528	0.00894538	0.0297559	-0.00554796	0.0548322	0.011942	-0.00735013	0.0188108	0.0366049	0.0682861	0.030991	0.02826	0.0590488	0.0373525	0	0.0201114	0.0375478	0.00768396	0.0101804	-0.000381009	0.0375808	0.0363258	0.412212	4.2731	0.00412602	0.0468359	0.0321799	1.32942
A0A2R8Y5P7	HARS2	Isoform of P49590, Histidine--tRNA ligase OS=Homo sapiens OX=9606 GN=HARS2 PE=1 SV=1	0.0090999	-0.0090999	0.0177174	0.00455841	0.0167101	-0.00467439	0.0914499	0.00362674	0.0196416	-0.0157967	0.0439926	0.039469	0.117789	0.00137348	0.187736	0.095089	0	0.0545006	0.0531284	0.042761	0.0207025	0.0607686	0.016229	-0.00320166	0.600309	3.25526	0.00412663	0.0468359	0.125762	1.32942
P40227	CCT6A	T-complex protein 1 subunit zeta OS=Homo sapiens OX=9606 GN=CCT6A PE=1 SV=3	-0.00513974	0.00513974	0.0364413	0.0543251	0.0230219	0.0543214	0.0386463	0.0196792	0.0269267	0.0114479	0.031116	0.0626035	0.0647047	0.0310153	0.0302139	0.0557872	0	0.0444945	0.00210047	0.0284591	0.0443279	0.0271919	-0.00561537	0.0317858	0.548044	6.3	0.00412987	0.0468359	0.038592	1.32942
P54652	HSPA2	Heat shock-related 70 kDa protein 2 OS=Homo sapiens OX=9606 GN=HSPA2 PE=1 SV=1	-0.0175421	0.0175421	-0.0899079	0.00446666	-0.0397689	-0.0614921	0.0342195	-0.0538228	-0.0320995	-0.00180559	-0.163227	-0.225685	-0.120632	-0.0279985	-0.137689	-0.140392	0	-0.00226795	0.0539738	0.0254174	0.0478628	0.0672871	0.0139356	0.0151112	0.600063	4.32443	0.00414373	0.0469184	-0.116248	1.32866
P49411	TUFM	Elongation factor Tu, mitochondrial OS=Homo sapiens OX=9606 GN=TUFM PE=1 SV=2	0.0189256	-0.0189256	-0.0609571	-0.0637331	-0.000395706	-0.111784	-0.0582247	-0.0444801	-0.129059	-0.109395	-0.12965	-0.155709	-0.102019	-0.102943	-0.0405199	-0.0547724	0	-0.0205679	-0.00274591	0.0198506	-0.0551553	-0.0243038	4.38318e-05	-0.0128332	0.464011	4.95946	0.00417514	0.047199	-0.0707174	1.32607
Q6P1J9	CDC73	Parafibromin OS=Homo sapiens OX=9606 GN=CDC73 PE=1 SV=1	-0.00227993	0.00227993	-0.0278999	0.0101152	-0.0467096	-0.0281332	-0.0361656	-0.0172584	-0.0191105	0.00377048	-0.0322717	-0.0362374	-0.0530293	-0.0089344	-0.0322768	-0.057758	0	-0.0565447	-0.0428229	0.0105617	-0.0176357	-0.011727	-0.0613221	-0.045344	0.296753	4.08558	0.00420477	0.0473912	-0.0245537	1.3243
P78406	RAE1	mRNA export factor OS=Homo sapiens OX=9606 GN=RAE1 PE=1 SV=1	0.00292929	-0.00292929	-0.0228778	-0.00517269	-0.0284267	-0.0715639	-0.0496898	-0.0212725	0.000126485	-0.0252409	-0.0585564	-0.106506	-0.0191214	-0.026075	-0.0996111	-0.0580949	0	-0.0474869	-0.0906014	-0.0482768	-0.0173665	-0.057272	-0.0671991	-0.0788092	0.368063	4.29154	0.00420546	0.0473912	-0.0426989	1.3243
Q9BTV4	TMEM43	Transmembrane protein 43 OS=Homo sapiens OX=9606 GN=TMEM43 PE=1 SV=1	0.019889	-0.019889	-0.239204	-0.0354558	-0.0285602	0.046042	-0.226844	-0.0429168	-0.256388	0.0632423	-0.431781	-0.054068	-0.358611	-0.207891	-0.169516	-0.414087	0	0.214721	0.289995	-0.662985	-0.296809	-0.0382176	0.077016	0.361082	0.437779	4.28318	0.00421515	0.0474061	-0.28404	1.32417
Q96H20	SNF8	Vacuolar-sorting protein SNF8 OS=Homo sapiens OX=9606 GN=SNF8 PE=1 SV=1	-0.0406527	0.0406527	0.0838904	0.0523913	0.047999	0.0524409	0.0722782	0.0257103	0.0300868	0.0463173	0.092949	0.0341111	0.0680928	0.0556129	0.0838669	0.0924487	0	0.0226505	0.0352032	-0.00733264	0.0300117	0.0161804	0.0395277	0.0151621	0.412012	6.3	0.00422009	0.0474061	0.104759	1.32417
Q7L9B9	EEPD1	Endonuclease/exonuclease/phosphatase family domain-containing protein 1 OS=Homo sapiens OX=9606 GN=EEPD1 PE=1 SV=2	0.0342811	-0.0342811	0.0090594	-0.067301	-0.090691	-0.0917491	0.031548	-0.0986123	-0.207547	0.0449908	-0.156524	-0.0610533	-0.24173	-0.112449	-0.156501	-0.120448	0	-0.0783146	-0.0891352	-0.116763	-0.0858893	-0.0460099	-0.141488	-0.13253	0.415655	4.30346	0.00423713	0.0474559	-0.177793	1.32371
Q9UMX5	NENF	Neudesin OS=Homo sapiens OX=9606 GN=NENF PE=1 SV=1	-0.00221427	0.00221427	0.0151472	-0.0126428	0.00394324	-0.057602	-0.0426739	-0.0123531	-0.0268614	0.00413099	0.0240196	0.033563	0.0122434	0.0161389	0.0698678	0.0642659	0	0.0490002	0.0537122	0.0794222	0.053659	0.0368728	0.0861601	0.0943736	0.598608	3.27768	0.00424627	0.0474559	0.0721009	1.32371
O15156	ZBTB7B	Zinc finger and BTB domain-containing protein 7B OS=Homo sapiens OX=9606 GN=ZBTB7B PE=1 SV=2	0.0706081	-0.0706081	-0.0386306	-0.0437542	-0.0857964	-0.080777	-0.0500935	-0.0604967	-0.071779	-0.0940891	-0.0827862	-0.0160712	-0.119319	-0.0539253	-0.152675	-0.107549	0	0.00584895	-0.0432168	-0.0479772	-0.0207766	-0.025852	-0.0423143	-0.0602274	0.40325	5.69978	0.00425483	0.0474559	-0.162534	1.32371
K7EKC1	FOSB	Isoform of P53539, Protein fosB OS=Homo sapiens OX=9606 GN=FOSB PE=1 SV=1	0.0411753	-0.0411753	0.0511022	-0.0403064	-0.0812773	0.128269	0.0402504	0.172822	0.0650078	0.179584	0.0625353	0.134969	0.144076	0.0099605	0.234274	0.164993	0	0.0780768	0.0500626	-0.059816	0.0777475	0.0660725	0.147556	0.0199141	0.418116	3.75996	0.0042575	0.0474559	0.201474	1.32371
Q14161-5	GIT2	Isoform of Q14161, Isoform 5 of ARF GTPase-activating protein GIT2 OS=Homo sapiens OX=9606 GN=GIT2 PE=1 SV=2	-0.175852	0.175852	-0.077766	-0.105766	-0.0511834	-0.398927	0.180035	-0.580112	-0.257812	-0.770829	-0.232753	-0.199327	-0.327117	-0.612823	-0.698897	-0.416071	0	-0.0891026	-0.306188	-0.424846	-0.180505	-0.15652	-0.31248	-0.267075	0.409842	4.55816	0.00425784	0.0474559	-0.729419	1.32371
Q15646	OASL	2'-5'-oligoadenylate synthase-like protein OS=Homo sapiens OX=9606 GN=OASL PE=1 SV=2	0.00303424	-0.00303424	-0.0520657	-0.0693105	-0.123088	-0.0591102	-0.130188	-0.0779753	-0.0762172	-0.118249	-0.134397	-0.0116153	-0.045043	-0.0842564	-0.0875965	-0.118158	0	-0.0199733	0.142321	0.201081	0.151433	0.136093	-0.102951	0.0113204	0.5983	6.03843	0.00426822	0.0474972	-0.088825	1.32333
O60343	TBC1D4	TBC1 domain family member 4 OS=Homo sapiens OX=9606 GN=TBC1D4 PE=1 SV=2	-0.048424	0.048424	0.126368	0.155303	0.0803719	0.0797383	0.172796	0.0537768	0.11841	0.104704	0.0589872	0.146507	0.144029	0.146894	0.0917445	0.124134	0	0.000437615	-0.00114008	0.0326923	0.0227332	0.0212282	0.104576	0.0492368	0.598016	6.3	0.0042886	0.0475445	0.114553	1.3229
Q92599	SEPTIN8	Septin-8 OS=Homo sapiens OX=9606 GN=SEPTIN8 PE=1 SV=4	-0.067137	0.067137	0.0412464	0.0863455	-0.000177196	0.0869379	0.1221	0.0360855	0.076393	0.044738	0.0664112	0.107577	0.108925	0.113181	0.0653179	0.141455	0	-0.0274392	0.000526367	0.0305852	-0.00736938	-0.0541179	-0.0359153	-0.0270949	0.412115	6.3	0.00429112	0.0475445	0.162761	1.3229
P12931	SRC	Proto-oncogene tyrosine-protein kinase Src OS=Homo sapiens OX=9606 GN=SRC PE=1 SV=3	-0.0158685	0.0158685	-0.00808647	0.00103243	0.0339152	0.0355804	0.0755534	0.0474653	0.0184074	0.0184455	0.0619212	-0.0145055	0.0626381	0.0949587	0.0434241	0.0597906	0	-0.0461075	-0.0260014	0.023155	-0.0171721	-0.0205551	-0.0135923	-0.0292022	0.409779	5.39577	0.00429249	0.0475445	0.0779731	1.3229
Q96DE0	NUDT16	U8 snoRNA-decapping enzyme OS=Homo sapiens OX=9606 GN=NUDT16 PE=1 SV=2	0.0385589	-0.0385589	0.0160011	0.00669923	0.0384663	0.0582607	0.0704046	0.0293958	0.0187619	0.018074	0.0658411	0.0664828	0.0616687	0.0348228	0.0376176	0.10153	0	0.0425771	0.0328392	0.0282317	0.0432293	0.0409879	0.0690914	0.0230232	0.40792	6.03943	0.00435408	0.0481518	0.0984744	1.31739
Q92610	ZNF592	Zinc finger protein 592 OS=Homo sapiens OX=9606 GN=ZNF592 PE=1 SV=2	0.0401756	-0.0401756	-0.0853043	-0.0314054	-0.0374732	-0.0316676	-0.0767462	-0.060414	-0.0537133	-0.0589123	-0.060847	-0.122628	-0.10954	-0.045289	-0.0801137	-0.0431787	0	-0.0251595	0.0223218	0.0181516	-0.03587	-0.00384261	0.00467868	-0.0167893	0.468109	6.3	0.00437172	0.048272	-0.089399	1.31631
Q9UPU5	USP24	Ubiquitin carboxyl-terminal hydrolase 24 OS=Homo sapiens OX=9606 GN=USP24 PE=1 SV=3	0.00236541	-0.00236541	-0.0276346	0.00206184	-0.0113305	-0.0262189	0.0030973	-0.00644994	0.00908595	-0.0333379	-0.0234559	-0.037223	-0.0235086	-0.0398051	-0.046928	-0.0155934	0	0.0445564	0.0194261	0.0419065	0.0137303	0.00474169	0.0220714	0.0176684	0.443927	4.46079	0.00439827	0.0484376	-0.024439	1.31482
P60660	MYL6	Myosin light polypeptide 6 OS=Homo sapiens OX=9606 GN=MYL6 PE=1 SV=2	-0.0170782	0.0170782	0.0473014	0.0225793	-0.00337717	-0.030197	0.0253878	-0.0823004	-0.0492035	-0.0141732	-0.0147184	0.15887	0.0824069	0.114227	0.0997306	0.161497	0	0.150605	0.161858	0.359526	0.180725	0.237134	0.180727	0.203247	0.596352	4.03115	0.00440939	0.0484376	0.121469	1.31482
Q2PPJ7	RALGAPA2	Ral GTPase-activating protein subunit alpha-2 OS=Homo sapiens OX=9606 GN=RALGAPA2 PE=1 SV=2	0.0216527	-0.0216527	-0.072866	-0.0535986	-0.0381461	-0.0780094	-0.0791571	-0.056459	-0.0365311	-0.0974759	-0.0849028	-0.0251735	-0.0620533	-0.048566	-0.0501668	-0.0922375	0	-0.0164148	-0.00279245	-0.00973388	0.00962909	-0.00513048	0.0489737	-0.00533819	0.596297	6.3	0.00441343	0.0484376	-0.0625453	1.31482
P49796	RGS3	Regulator of G-protein signaling 3 OS=Homo sapiens OX=9606 GN=RGS3 PE=1 SV=2	0.00776673	-0.00776673	0.0485698	0.0106465	0.0560252	0.0217058	0.0345484	0.0276329	0.0448802	0.0237634	0.056826	0.0444638	0.0295042	0.0229737	0.0433238	0.0292654	0	0.0338433	0.0467275	0.0174815	-0.00173479	0.0218174	-0.00635225	-0.0115909	0.595667	6.07479	0.00441393	0.0484376	0.0362428	1.31482
P39019	RPS19	40S ribosomal protein S19 OS=Homo sapiens OX=9606 GN=RPS19 PE=1 SV=2	-0.0093532	0.0093532	0.0249198	0.0530583	0.0176264	0.0640241	0.00790814	0.0433733	-0.0294909	0.054341	0.00826716	0.0580626	0.0613278	0.0485004	0.0857608	0.113169	0	0.131272	0.261891	-0.138298	0.0985774	0.136068	0.183135	0.108059	0.516392	3.25542	0.00443834	0.0486305	0.0799019	1.31309
A0A0C4DGT3	IQSEC1	Isoform of Q6DN90, Epididymis secretory sperm binding protein OS=Homo sapiens OX=9606 GN=IQSEC1 PE=1 SV=1	-0.0478504	0.0478504	0.133024	0.137629	0.0474577	0.0783217	0.105262	0.181944	0.160194	0.213536	0.252899	0.225588	0.227216	0.209963	-0.0519982	0.311549	NA	NA	NA	NA	NA	NA	NA	NA	0.463517	6.10476	0.00444788	0.0486603	0.231359	1.31283
H7C5P4	RFC2	Isoform of P35250, Replication factor C subunit 2 (Fragment) OS=Homo sapiens OX=9606 GN=RFC2 PE=1 SV=1	0.0881422	-0.0881422	-0.227805	-0.242934	-0.242231	-0.317337	-0.32225	-0.157694	-0.317631	-0.275464	-0.206211	-0.283245	-0.376527	-0.163739	-0.283511	-0.0350076	NA	NA	NA	NA	NA	NA	NA	NA	0.595711	6.14469	0.00445672	0.0486821	-0.248404	1.31263
P01040	CSTA	Cystatin-A OS=Homo sapiens OX=9606 GN=CSTA PE=1 SV=1	-0.0936188	0.0936188	0.0776136	0.0958811	0.106284	0.0990086	0.0300697	0.0786993	0.0780186	0.0945711	0.135625	0.117892	0.0837933	0.119099	0.133713	0.148905	0	0.11275	0.130678	0.0788636	0.13622	0.146128	0.147929	0.125856	0.412739	6.3	0.00447976	0.0488589	0.175221	1.31106
P61962	DCAF7	DDB1- and CUL4-associated factor 7 OS=Homo sapiens OX=9606 GN=DCAF7 PE=1 SV=1	0.0110175	-0.0110175	0.0152029	-0.0165842	-0.0157344	-0.0287591	-0.0289728	-0.0505674	-0.00411648	-0.0328042	0.00723803	-0.0553268	-0.0545211	-0.0150451	-0.0485269	-0.0488867	0	-0.0098322	-0.0185369	-0.0115202	0.018707	-0.0586342	-0.0456719	-0.0431175	0.403988	4.77327	0.00449873	0.0489908	-0.0664599	1.30989
H0Y993	DEK	Isoform of P35659, DEK oncogene (DNA binding), isoform CRA_b OS=Homo sapiens OX=9606 GN=DEK PE=1 SV=2	0.00719859	-0.00719859	-0.0134234	0.00619675	0.0246549	0.0356389	0.0578403	0.029534	0.026749	0.0341845	0.0176723	0.0319645	0.0373427	0.0641879	0.0267854	0.00599128	0	0.048298	0.0230694	-0.0358556	0.0301712	0.0618292	0.0548917	0.0576175	0.595014	5.6385	0.00450864	0.0490237	0.0344402	1.30959
Q04864-2	REL	Isoform of Q04864, Isoform 2 of Proto-oncogene c-Rel OS=Homo sapiens OX=9606 GN=REL PE=1 SV=1	-0.0154354	0.0154354	0.0246332	-0.0404269	-0.00316321	-0.0244818	-0.0233423	-0.00406747	-0.0200765	-0.00870658	-0.0602959	-0.0164216	-0.0285809	-0.0519208	-0.0706591	-0.0228541	0	0.00580982	0.0215986	0.0465953	-0.0100053	-0.0127899	-0.00563547	-0.0555759	0.433443	4.01652	0.00454725	0.0493682	-0.0482309	1.30655
Q13148	TARDBP	TAR DNA-binding protein 43 OS=Homo sapiens OX=9606 GN=TARDBP PE=1 SV=1	-0.0519106	0.0519106	-0.0736754	0.0133418	-0.0235244	0.0112604	-0.0731364	-0.0467932	-0.075098	-0.0629705	-0.0925437	-0.0636043	-0.077152	0.00095309	-0.103775	-0.124471	0	-0.0745263	-0.089039	-0.153803	-0.0572177	-0.0817565	-0.123309	-0.0809161	0.406176	4.12708	0.00456088	0.0494408	-0.126918	1.30591
P84103	SRSF3	Serine/arginine-rich splicing factor 3 OS=Homo sapiens OX=9606 GN=SRSF3 PE=1 SV=1	0.017957	-0.017957	0.0254875	-0.0159182	0.0023444	-0.00515326	-0.0049192	0.00691804	0.00359037	-0.0158891	-0.0313961	-0.0499888	-0.0290486	-0.0605313	-0.0280518	-0.13764	0	-0.0799781	-0.00890905	-0.0276428	-0.0326743	-0.0386333	-0.105181	-0.106603	0.594064	3.41467	0.00458018	0.0495067	-0.083699	1.30534
Q13547	HDAC1	Histone deacetylase 1 OS=Homo sapiens OX=9606 GN=HDAC1 PE=1 SV=1	0.0131037	-0.0131037	-0.0529653	-0.010061	-0.0489143	-0.0343013	-0.090999	-0.0605273	-0.0424954	-0.0464515	-0.0451156	-0.0742222	-0.0441115	-0.0515713	-0.0165964	-0.0697627	0	-0.0574319	-0.0634974	-0.0714928	-0.0190848	0.0116136	-0.0633415	-0.06088	0.594055	6.07082	0.00458086	0.0495067	-0.0535332	1.30534
Q9HB58	SP110	Sp110 nuclear body protein OS=Homo sapiens OX=9606 GN=SP110 PE=1 SV=5	0.00713405	-0.00713405	-0.000874361	-0.00441704	-0.0604256	0.0211543	-0.00628161	0.0403268	-0.0519409	0.0171237	-0.0778301	-0.070468	-0.0495849	-0.0173746	-0.0923731	-0.0938179	0	0.0323635	0.0397629	0.0407358	0.0782443	0.038113	0.034638	-0.0783113	0.564923	4.46752	0.00465986	0.0502702	-0.0658581	1.29869
Q7Z591	AKNA	Microtubule organization protein AKNA OS=Homo sapiens OX=9606 GN=AKNA PE=1 SV=2	-0.0123311	0.0123311	0.0345833	0.0176272	0.0250652	0.0474135	0.0942512	0.0427663	0.0478381	0.0174716	0.00803067	0.0968336	0.0490041	0.0385353	0.0706355	0.0512836	0	-0.0315222	-0.0891206	-0.0214348	-0.036222	-0.0467943	-0.027469	-0.005063	0.466692	5.98002	0.00466563	0.0502702	0.0514151	1.29869
P50453	SERPINB9	Serpin B9 OS=Homo sapiens OX=9606 GN=SERPINB9 PE=1 SV=1	0.00934754	-0.00934754	0.0174124	0.00545852	0.0218485	0.0273681	0.0274026	0.0239682	0.014609	-0.0118922	0.01973	-0.00587369	0.0153121	0.0126326	0.0606022	0.0531155	0	0.0664356	0.0415603	0.0580758	0.0584934	0.037229	0.0394086	0.06049	0.592776	3.40387	0.00467877	0.0503348	0.0468566	1.29813
H3BN98	readthrough,	readthrough, 40S ribosomal protein S15a (Fragment) OS=Homo sapiens OX=9606 PE=3 SV=2	-0.0243642	0.0243642	-0.0314152	-0.0502028	-0.0810353	-0.111505	-0.0110171	-0.0468098	-0.0486089	-0.050877	0.00747019	0.0138397	-0.198271	0.0195376	-0.215682	-0.218669	0	-0.136167	-0.14613	-0.165793	-0.133138	-0.135501	-0.319961	-0.435097	0.5926	3.48511	0.00469242	0.0503348	-0.187879	1.29813
P24666-2	ACP1	Isoform of P24666, Isoform 2 of Low molecular weight phosphotyrosine protein phosphatase OS=Homo sapiens OX=9606 GN=ACP1 PE=1 SV=3	-0.0443404	0.0443404	-0.0597325	-0.0209752	-0.0967014	-0.0261364	-0.155292	0.0234008	-0.0452504	-0.0420143	-0.0270972	-0.169418	-0.144708	-0.0262196	-0.182267	-0.152048	0	0.116837	0.133104	0.161519	0.100952	0.161997	0.134071	0.0893398	0.410544	3.50998	0.00469283	0.0503348	-0.145378	1.29813
O15084	ANKRD28	Serine/threonine-protein phosphatase 6 regulatory ankyrin repeat subunit A OS=Homo sapiens OX=9606 GN=ANKRD28 PE=1 SV=5	-0.00341983	0.00341983	0.0321578	0.0381183	-0.00650578	-0.0118178	0.105231	0.0196997	0.0643653	-0.000225141	0.093844	0.108876	0.0753964	0.012061	0.0525763	0.101691	0	0.0256528	0.00622632	-0.00172157	-0.00152107	-0.0368545	-0.0824967	-0.0305535	0.424992	5.05694	0.00470263	0.0503641	0.0642389	1.29788
O15212	PFDN6	Prefoldin subunit 6 OS=Homo sapiens OX=9606 GN=PFDN6 PE=1 SV=1	0.0297948	-0.0297948	0.0439133	-0.0123992	0.0111841	-0.0165215	0.0160066	0.0332883	0.0413525	0.0197799	0.0392296	0.032584	0.0444331	0.010039	0.0704263	0.0616695	0	0.0204617	0.0294199	0.0162156	-0.00191335	0.0124344	-0.00243932	0.0518319	0.433332	3.42059	0.00472261	0.0504482	0.0573539	1.29715
Q9Y2H0	DLGAP4	Disks large-associated protein 4 OS=Homo sapiens OX=9606 GN=DLGAP4 PE=1 SV=3	-0.0216346	0.0216346	0.032437	0.0270837	0.0258942	0.058012	0.06098	0.0228114	0.0709645	-0.00365594	0.0343074	0.0197863	0.0273434	0.0532121	0.0832662	0.0677555	0	0.0785751	0.0902142	0.09311	0.0627948	0.0570999	0.0630432	0.0794021	0.374287	6.3	0.00473032	0.0504482	0.045853	1.29715
Q9H6D7	HAUS4	HAUS augmin-like complex subunit 4 OS=Homo sapiens OX=9606 GN=HAUS4 PE=1 SV=1	-0.0458323	0.0458323	0.319836	0.225863	0.193487	0.290604	0.231491	0.267618	0.155807	0.0482706	0.23035	0.383963	0.430458	0.232216	0.196336	0.189096	0	-0.00755185	0.00375364	-0.00320507	0.0271705	0.0288934	0.0485702	0.0216127	0.592094	6.3	0.00473174	0.0504482	0.242565	1.29715
Q06187	BTK	Tyrosine-protein kinase BTK OS=Homo sapiens OX=9606 GN=BTK PE=1 SV=3	0.0372855	-0.0372855	-0.0369292	-0.0249226	-0.0338224	-0.0405399	-0.0741513	-0.0307928	-0.0568088	-0.076752	-0.0400172	-0.0475537	-0.0609477	-0.0445361	-0.0506015	-0.048024	0	0.0111634	0.0223717	0.0361013	0.0345163	-0.00701437	0.0159492	0.00680277	0.510296	6.08995	0.00474485	0.0505124	-0.0552586	1.2966
O43920	NDUFS5	NADH dehydrogenase [ubiquinone] iron-sulfur protein 5 OS=Homo sapiens OX=9606 GN=NDUFS5 PE=1 SV=3	0.012406	-0.012406	-0.157007	-0.167685	-0.105934	-0.0997026	-0.175427	-0.0480996	-0.1003	0.000911807	-0.175328	-0.226334	-0.31244	-0.156738	-0.141729	-0.100943	0	0.201932	0.270958	0.0905667	0.184843	0.275109	0.0516142	0.370461	0.447192	6.3	0.00476902	0.0506882	-0.140497	1.29509
P08514	ITGA2B	Integrin alpha-IIb OS=Homo sapiens OX=9606 GN=ITGA2B PE=1 SV=3	-0.0176839	0.0176839	-0.128608	-0.118286	-0.0063775	-0.0227838	-0.0240255	-0.00316693	-0.0259515	-0.0175273	-0.118759	-0.0932657	-0.175995	-0.0399119	-0.133704	-0.195819	0	0.0448572	0.0421677	-0.0367788	0.014549	0.0340075	0.0399097	0.106361	0.503241	4.07097	0.0047756	0.0506882	-0.107629	1.29509
P42331	ARHGAP25	Rho GTPase-activating protein 25 OS=Homo sapiens OX=9606 GN=ARHGAP25 PE=1 SV=2	-0.0320308	0.0320308	0.0673162	-0.0171567	0.0057664	-0.0669028	-0.121874	-0.0489382	-0.0155851	-0.0644902	-0.144648	-0.113867	-0.0793947	-0.082017	-0.0403344	-0.0895408	0	-0.0313104	0.048679	-0.127729	-0.107235	-0.146692	-0.118986	-0.0590449	0.541266	5.51086	0.00479365	0.0507421	-0.0884302	1.29463
Q5TFE4	NT5DC1	5'-nucleotidase domain-containing protein 1 OS=Homo sapiens OX=9606 GN=NT5DC1 PE=1 SV=1	-0.0381038	0.0381038	0.0486463	0.0727489	0.056819	0.0662861	0.0673268	0.0709064	0.0429975	0.0198037	0.050142	0.0798611	0.0619449	0.0499073	0.101986	0.0641558	0	0.0243451	0.0166538	0.00797016	0.0174151	0.0355382	0.00708899	0.000843202	0.172717	4.09287	0.00479757	0.0507421	0.0334024	1.29463
O75175	CNOT3	CCR4-NOT transcription complex subunit 3 OS=Homo sapiens OX=9606 GN=CNOT3 PE=1 SV=1	-0.00412022	0.00412022	-0.00277726	-0.0265341	0.00899955	0.0118039	0.0493252	0.0288431	0.0193528	0.0343003	0.0276047	0.00797845	0.00125368	0.0200261	0.0396456	0.0361769	0	0.0883829	0.0742549	0.13992	0.108828	0.104197	0.086711	0.119067	0.591189	5.52044	0.00480272	0.0507421	0.0313362	1.29463
O95684	CEP43	Centrosomal protein 43 OS=Homo sapiens OX=9606 GN=CEP43 PE=1 SV=1	-0.0143195	0.0143195	0.0721428	0.0348507	0.06835	0.0485042	0.0856862	0.0305493	0.0488888	0.084728	0.0241176	0.0296279	0.0520328	0.0846987	0.06321	0.0551032	0	0.0503283	0.105631	0.12301	0.0545284	0.0276896	0.12584	0.11985	0.591107	6.1476	0.00480918	0.0507421	0.0562914	1.29463
P86790	CCZ1B	Vacuolar fusion protein CCZ1 homolog B OS=Homo sapiens OX=9606 GN=CCZ1B PE=1 SV=1	0.0279169	-0.0279169	-0.0212745	-0.0406705	-0.0497269	-0.0608385	-0.113967	-0.0667494	-0.0595067	-0.0312173	-0.0537322	-0.0541357	-0.10887	-0.0640705	-0.0369958	-0.0602081	0	0.0607845	0.0432188	0.0345116	0.0470248	0.0380082	0.0807151	0.0182815	0.558019	5.97883	0.0048245	0.0508285	-0.0643546	1.29389
Q12802	AKAP13	A-kinase anchor protein 13 OS=Homo sapiens OX=9606 GN=AKAP13 PE=1 SV=2	0.0131082	-0.0131082	0.0185242	0.0106306	0.0193285	0.0224207	0.027414	0.00874626	0.00303271	0.000144024	0.0298096	0.0239185	0.021555	0.0278438	0.0208416	0.0314413	0	0.0257998	0.0203785	0.0660312	0.0401045	0.0242281	0.0150387	0.0113515	0.364564	4.21305	0.00485399	0.0510637	0.0167828	1.29189
P50748	KNTC1	Kinetochore-associated protein 1 OS=Homo sapiens OX=9606 GN=KNTC1 PE=1 SV=1	-0.0326572	0.0326572	0.0452794	0.0637702	0.0587026	0.0979523	-0.0622223	-0.0783762	0.0209604	0.119038	0.129233	0.0967836	0.115138	0.0906206	0.137121	0.177682	0	0.0139067	0.0463238	-0.019054	-0.00414248	-0.0566122	-0.0208768	-0.0674285	0.531981	4.52556	0.00487476	0.0512065	0.111921	1.29067
Q9Y2D5	AKAP2	A-kinase anchor protein 2 OS=Homo sapiens OX=9606 GN=AKAP2 PE=1 SV=3	0.0220848	-0.0220848	0.00998592	0.029103	0.00483064	0.0031012	-0.00539027	0.0177565	0.0349224	0.00151362	0.0411507	0.0426665	0.0434301	0.02492	0.0238493	0.0467117	0	0.0110768	0.0186024	0.00318342	0.0252363	0.00576062	-0.00408559	0.0161442	0.477905	4.50131	0.0048821	0.0512081	0.0311833	1.29066
Q8N103	TAGAP	T-cell activation Rho GTPase-activating protein OS=Homo sapiens OX=9606 GN=TAGAP PE=1 SV=1	-0.0211782	0.0211782	0.0885401	0.0280349	0.07417	0.0832148	0.046897	0.059291	0.0102564	0.0376952	0.0702654	0.0510677	0.0565024	0.0415835	0.0786949	0.118855	0	0.0939973	-0.00118849	0.0397437	0.0567003	0.0102237	0.0847365	0.0689071	0.488421	6.13998	0.00489518	0.0512129	0.0618347	1.29062
H0YLM8	DMXL2	Isoform of Q8TDJ6, DmX-like protein 2 OS=Homo sapiens OX=9606 GN=DMXL2 PE=1 SV=2	-0.00259746	0.00259746	-0.0498379	-0.0230983	-0.0496091	-0.0522743	-0.0659579	-0.0484446	-0.045255	-0.0514071	-0.0307763	-0.0643112	-0.0395722	-0.0323849	0.00292812	-0.0558069	0	0.00159759	0.0207807	0.0313953	0.0127043	-0.037025	-0.00380359	-0.0265753	0.589933	6.07625	0.0049027	0.0512129	-0.044406	1.29062
O95816	BAG2	BAG family molecular chaperone regulator 2 OS=Homo sapiens OX=9606 GN=BAG2 PE=1 SV=1	0.00686159	-0.00686159	0.0375843	0.0603636	-0.0105571	0.0205995	0.0391786	0.038305	0.107826	0.138314	0.0356201	0.0438597	0.058014	0.057953	0.0492177	0.0932687	0	-0.02392	-0.0229683	-0.102785	-0.036046	0.00737412	-0.0470883	-0.0635795	0.513079	4.98479	0.00490413	0.0512129	0.0595104	1.29062
Q16512	PKN1	Serine/threonine-protein kinase N1 OS=Homo sapiens OX=9606 GN=PKN1 PE=1 SV=2	-0.0247624	0.0247624	-0.00599465	0.0166965	-0.00232809	-0.0290195	-0.0249807	-0.0584949	-0.013114	-0.0536579	-0.0337006	-0.0219598	-0.0337455	-0.0639813	-0.0381197	-0.0314556	0	0.030697	0.00825201	0.0401654	-0.00235488	-0.0126008	0.00367093	-0.00125008	0.511209	5.51212	0.00495907	0.0517109	-0.0391055	1.28642
Q8WVK2	SNRNP27	U4/U6.U5 small nuclear ribonucleoprotein 27 kDa protein OS=Homo sapiens OX=9606 GN=SNRNP27 PE=1 SV=1	-0.0163391	0.0163391	0.034105	0.0304045	0.00613347	0.0588654	-0.000498067	0.0150942	0.0819619	0.107469	-0.0269338	-0.062166	-0.0289474	-0.0565353	-0.0809624	-0.183688	0	0.0721914	0.0107646	0.043724	0.12707	0.0356716	0.0881048	-0.0502197	0.589039	4.02598	0.004975	0.0518011	-0.115336	1.28566
Q9ULR0	ISY1	Pre-mRNA-splicing factor ISY1 homolog OS=Homo sapiens OX=9606 GN=ISY1 PE=1 SV=3	-0.0133627	0.0133627	0.0304526	0.0278015	0.015342	0.0201996	-0.00222172	-0.0192247	0.0158566	0.0446779	0.0531155	0.0842053	0.0502512	0.0588068	0.0114068	0.0725911	0	0.023319	-0.000327047	-0.0211857	0.0442016	0.0503374	0.0593029	0.118739	0.572948	4.51918	0.00498589	0.0518387	0.0478283	1.28535
P19525	EIF2AK2	Interferon-induced, double-stranded RNA-activated protein kinase OS=Homo sapiens OX=9606 GN=EIF2AK2 PE=1 SV=2	0.00969538	-0.00969538	-0.0116891	-0.0196538	-0.0619445	-0.0616349	-0.0664036	-0.050836	-0.0760849	-0.0262584	-0.0790257	-0.098786	0.0271393	-0.0340161	-0.09462	-0.154915	0	0.0109013	-0.0191048	0.0095015	-0.018651	-0.0236612	-0.0203063	-0.0111568	0.392516	5.79641	0.00502863	0.0522068	-0.128941	1.28227
Q00722	PLCB2	1-phosphatidylinositol 4,5-bisphosphate phosphodiesterase beta-2 OS=Homo sapiens OX=9606 GN=PLCB2 PE=1 SV=2	0.00496211	-0.00496211	-0.00754536	0.006979	0.0210395	-0.00630071	-0.00366619	-0.0099568	-0.00327966	-0.0190143	0.00688099	-0.00638055	0.0183213	-0.00683098	-0.030538	-0.0456988	0	0.0391342	0.0307444	0.0542719	0.0408913	0.0238929	0.0448107	0.04849	0.588225	3.04317	0.00504156	0.0522649	-0.037507	1.28179
P61952	GNG11	Guanine nucleotide-binding protein G(I)/G(S)/G(O) subunit gamma-11 OS=Homo sapiens OX=9606 GN=GNG11 PE=1 SV=1	0.0209319	-0.0209319	0.0192689	0.0304107	0.061695	0.101628	0.0871443	0.123527	0.0238488	0.0346231	0.0743497	0.0792398	0.0614506	0.0616933	0.103799	0.0498232	0	-0.0305095	-0.103046	-0.0466273	-0.0168246	-0.0815983	-0.134994	-0.0555539	0.140853	4.24268	0.005063	0.0524109	0.0316072	1.28058
O15553	MEFV	Pyrin OS=Homo sapiens OX=9606 GN=MEFV PE=1 SV=1	0.0189549	-0.0189549	-0.0229093	0.014391	-0.0181413	-0.00279421	-0.0809045	-0.0372812	-0.0883451	-0.02784	-0.0804115	-0.0481143	-0.0349219	-0.0222125	-0.0430116	-0.0554932	0	0.025365	0.00370777	0.0519147	0.0160403	0.00720453	-0.0149511	-0.0551904	0.587555	5.44691	0.00509685	0.0526847	-0.0504366	1.27832
Q13651	IL10RA	Interleukin-10 receptor subunit alpha OS=Homo sapiens OX=9606 GN=IL10RA PE=1 SV=2	-0.0480377	0.0480377	0.124225	-0.00151268	0.158493	0.0399615	0.017276	0.0661311	-0.0583766	0.122614	0.157248	0.14185	0.246754	0.092911	0.105385	0.198425	NA	NA	NA	NA	NA	NA	NA	NA	0.434366	4.11377	0.00512793	0.0528633	0.121816	1.27685
Q9NZR1	TMOD2	Tropomodulin-2 OS=Homo sapiens OX=9606 GN=TMOD2 PE=1 SV=1	0.0139981	-0.0139981	0.0450441	0.0201075	0.0201565	-0.0191813	-0.0136442	-0.019988	0.0211641	0.00661437	0.0488077	0.0202186	0.0104235	0.045524	0.0728004	0.0876934	0	-0.0363398	-0.01706	-0.0225161	-0.0439085	-0.00376483	-0.0245476	-0.00245797	0.587055	3.25528	0.00513855	0.0528633	0.0696563	1.27685
O00264	PGRMC1	Membrane-associated progesterone receptor component 1 OS=Homo sapiens OX=9606 GN=PGRMC1 PE=1 SV=3	0.0447149	-0.0447149	-0.0865338	-0.102286	-0.0368605	-0.0626584	-0.153677	-0.11605	0.020282	0.00156096	-0.0523143	-0.0258831	-0.1579	-0.147169	-0.243236	-0.172133	0	-0.0420236	0.077421	-0.057362	-0.0781462	-0.0650692	-0.0934646	-0.00860678	0.559956	3.55678	0.00514367	0.0528633	-0.163802	1.27685
A0A0B4J1V8	PPAN-P2RY11	PPAN-P2RY11 readthrough, HCG2039996 OS=Homo sapiens OX=9606 GN=PPAN-P2RY11 PE=3 SV=1	-0.0581343	0.0581343	-0.115128	-0.0639346	-0.00308759	-0.0429808	-0.0631516	-0.100959	-0.147685	-0.0761498	-0.169495	-0.178776	-0.120148	-0.0690662	-0.102859	-0.0695616	NA	NA	NA	NA	NA	NA	NA	NA	0.434637	5.02208	0.00514382	0.0528633	-0.0885781	1.27685
Q5VY60	HAUS6	Isoform of Q7Z4H7, HAUS augmin-like complex subunit 6 OS=Homo sapiens OX=9606 GN=HAUS6 PE=1 SV=1	0.0027431	-0.0027431	0.0305482	-0.0610921	0.027305	0.0741963	0.0916065	0.177643	0.0687787	0.0763378	-0.0100002	0.102016	0.100853	0.128801	0.0921836	0.0834814	0	0.0109662	-0.0276686	-0.0484723	-0.0061617	-0.0224814	-0.0605149	-0.0873001	0.574477	5.53904	0.00516441	0.0528825	0.0962634	1.27669
Q9UPY8	MAPRE3	Microtubule-associated protein RP/EB family member 3 OS=Homo sapiens OX=9606 GN=MAPRE3 PE=1 SV=1	0.00589192	-0.00589192	-0.0223455	-0.105352	-0.0779912	-0.0560936	-0.0643612	-0.00310269	-0.114071	-0.00244996	-0.141313	-0.0687285	-0.0851398	-0.0710603	-0.0955321	-0.0604941	0	0.0222987	0.0728484	0.0503331	0.068526	0.0631404	-0.00855279	0.0765788	0.307609	4.51651	0.0051648	0.0528825	-0.054121	1.27669
Q92925	SMARCD2	SWI/SNF-related matrix-associated actin-dependent regulator of chromatin subfamily D member 2 OS=Homo sapiens OX=9606 GN=SMARCD2 PE=1 SV=3	-0.0113179	0.0113179	0.00148939	0.00784301	0.0181173	0.0323465	0.000580648	0.0148974	0.0419692	-0.00210639	0.0181042	0.0453204	0.0770746	0.012067	0.0860689	0.0176737	0	-0.060419	-0.000424994	-0.0545138	-0.0132104	0.0305376	-0.0150376	-0.0823825	0.424632	3.65237	0.00516796	0.0528825	0.0521147	1.27669
P55957	BID	BH3-interacting domain death agonist OS=Homo sapiens OX=9606 GN=BID PE=1 SV=1	-0.00974123	0.00974123	0.0437917	0.0304353	0.0489702	0.0156294	0.023619	0.027149	0.0210062	0.0520376	0.0260577	0.0374765	-0.00219209	0.0402301	0.0556978	0.0719068	0	0.0364257	0.0939421	0.0780191	0.0866435	0.0162161	0.0998497	0.0594078	0.393575	6.3	0.00519904	0.0531241	0.0678301	1.27471
P20936	RASA1	Ras GTPase-activating protein 1 OS=Homo sapiens OX=9606 GN=RASA1 PE=1 SV=1	-0.0348625	0.0348625	-0.0536394	0.00202451	-0.0187951	-0.0285499	-0.0162588	-0.104439	-0.0638451	-0.0732088	-0.0619895	-0.0522601	-0.0926207	-0.029047	-0.0785554	-0.0419929	0	0.0550619	0.0519309	0.0698432	0.0671997	0.0504101	0.0600796	0.0902225	0.447918	5.61109	0.00521578	0.0531739	-0.0620535	1.2743
O95202	LETM1	Mitochondrial proton/calcium exchanger protein OS=Homo sapiens OX=9606 GN=LETM1 PE=1 SV=1	-0.00944636	0.00944636	0.00213076	-0.0155943	0.0367906	0.0352502	0.0131303	0.0711963	0.0195945	0.0388866	0.0648858	0.0467111	-0.0135512	0.0397417	0.0515648	0.0836124	0	-0.187997	-0.124493	-0.107002	-0.182845	-0.054218	-0.236681	-0.1276	0.473762	5.61913	0.00522044	0.0531739	0.0438298	1.2743
Q9UL17	TBX21	T-box transcription factor TBX21 OS=Homo sapiens OX=9606 GN=TBX21 PE=1 SV=1	-0.0478398	0.0478398	0.102527	0.0504922	0.0193657	0.0962293	0.123423	0.108893	0.0284338	0.0915682	0.116508	0.140878	0.0978576	0.0704009	0.0529578	0.13869	0	0.0151158	0.00715029	0.0537632	0.0175247	0.03501	0.0341304	0.0832113	0.479595	6.3	0.00522968	0.0531739	0.106224	1.2743
P13010	XRCC5	X-ray repair cross-complementing protein 5 OS=Homo sapiens OX=9606 GN=XRCC5 PE=1 SV=3	-0.0152725	0.0152725	-0.00880401	0.0233199	0.0134745	-0.00509837	-0.0139697	-0.0209658	-0.0231123	-0.0118555	-0.0144435	-0.0519473	-0.0162412	-0.0301621	-0.0124342	-0.0594471	0	0.0518578	0.012332	0.0256695	0.0178379	-0.00589972	0.0284052	0.0642419	0.479523	4.93102	0.00523377	0.0531739	-0.033585	1.2743
O00471	EXOC5	Exocyst complex component 5 OS=Homo sapiens OX=9606 GN=EXOC5 PE=1 SV=1	-0.00987309	0.00987309	0.00691422	0.00866617	-0.00114624	-0.0136849	-0.0125315	-0.059317	-0.023927	0.00474017	-0.030243	0.0437879	-0.032803	-0.0512754	-0.0680188	-0.0925637	0	0.00818991	-0.012752	0.0503766	-0.00634109	-0.0116656	-0.0281513	0.000297203	0.585794	3.5206	0.00524483	0.0532104	-0.0748109	1.274
C9JYN0	SYPL1	Isoform of Q16563, Synaptophysin-like protein 1 OS=Homo sapiens OX=9606 GN=SYPL1 PE=1 SV=1	0.0503492	-0.0503492	-0.0125449	-0.0798249	-0.0158953	-0.0511937	-0.0458788	-0.0326957	-0.0454482	-0.0226524	-0.0198979	-0.0904862	-0.127359	-0.0807397	-0.0739153	-0.0747217	0	0.015704	-0.0371195	-0.0689506	-0.0305018	-0.00654155	-0.0217815	-0.0326381	0.391157	4.98473	0.00526823	0.0533717	-0.111054	1.27269
P57076	CFAP298	Cilia- and flagella-associated protein 298 OS=Homo sapiens OX=9606 GN=CFAP298 PE=1 SV=1	0.078495	-0.078495	-0.0911322	0.0799516	0.03454	0.0273232	0.121676	0.0848935	0.0803313	0.0445314	-0.00793855	0.115663	0.137305	0.0812212	0.146142	0.182417	0	0.0165838	0.0255578	-0.0112642	0.00914385	0.0127491	-0.0369684	0.0237075	0.414523	3.56474	0.00528727	0.0534885	0.156672	1.27174
Q6GMV3	PTRHD1	Putative peptidyl-tRNA hydrolase PTRHD1 OS=Homo sapiens OX=9606 GN=PTRHD1 PE=1 SV=1	0.0113563	-0.0113563	-0.00801328	-0.0164405	0.0059449	0.0151893	0.030077	-0.00486754	0.0347869	-0.0264441	0.0313405	0.118515	0.0555656	0.00435237	0.0721359	0.0869033	0	0.0240979	0.0608269	0.0401568	0.0587959	0.013715	0.0240527	-0.0269911	0.534821	4.36214	0.005301	0.0535514	0.0593356	1.27123
P26885	FKBP2	Peptidyl-prolyl cis-trans isomerase FKBP2 OS=Homo sapiens OX=9606 GN=FKBP2 PE=1 SV=2	-0.010296	0.010296	0.0418974	0.0181193	0.0463614	0.0715813	0.0644805	0.0408147	0.05264	0.00180815	0.0708038	0.0471591	0.0316974	0.0456958	0.0449718	0.038426	0	0.0706521	0.0440772	0.0969343	0.0927522	0.127288	0.111535	0.108144	0.584992	6.03034	0.00531339	0.0536006	0.0463701	1.27083
B1AJU2	TRAF3IP3	Isoform of Q9Y228, TRAF3-interacting JNK-activating modulator OS=Homo sapiens OX=9606 GN=TRAF3IP3 PE=1 SV=1	0.0632554	-0.0632554	-0.00747673	-0.0805534	-0.0610277	-0.00794597	-0.00764784	-0.0294355	-0.00850139	-0.0342915	-0.0187752	-0.102647	-0.172854	-0.144157	-0.139516	-0.0772294	NA	NA	NA	NA	NA	NA	NA	NA	0.548002	3.97133	0.00533289	0.0536687	-0.113704	1.27028
H3BTH8	HAPLN3	Isoform of Q96S86, Hyaluronan and proteoglycan link protein 3 OS=Homo sapiens OX=9606 GN=HAPLN3 PE=1 SV=1	-0.077466	0.077466	0.138926	0.0286095	0.160364	0.0941901	0.118632	0.122579	-0.0116179	0.119649	0.169972	0.413485	-0.00103451	0.17356	0.240996	0.451085	NA	NA	NA	NA	NA	NA	NA	NA	0.368162	4.29807	0.00533522	0.0536687	0.177413	1.27028
Q9UBR2	CTSZ	Cathepsin Z OS=Homo sapiens OX=9606 GN=CTSZ PE=1 SV=1	0.0125512	-0.0125512	0.0371314	-0.00570032	-0.0399638	-0.0274428	-0.00490918	-0.0553365	-0.0427159	-0.0813714	-0.00225749	-0.0595653	-0.0400661	-0.0451959	-0.0419696	-0.0485546	0	-0.017312	-0.0110294	0.00307239	-0.0269354	-0.0650953	-0.0702545	-0.0745443	0.550835	5.59885	0.00540635	0.0542618	-0.0474387	1.26551
Q9BSE5	AGMAT	Agmatinase, mitochondrial OS=Homo sapiens OX=9606 GN=AGMAT PE=1 SV=2	0.0484994	-0.0484994	0.0465425	-0.0462595	0.0793644	-0.0412659	0.0108736	0.130595	0.0296007	0.0734415	-0.0024674	0.0351171	0.0972025	0.0751736	0.169382	0.170729	0	-0.203607	-0.228844	-0.255254	-0.127459	-0.230619	-0.0602942	-0.0692542	0.513444	3.50908	0.00540942	0.0542618	0.147518	1.26551
P55263	ADK	Adenosine kinase OS=Homo sapiens OX=9606 GN=ADK PE=1 SV=2	0.0253123	-0.0253123	-0.00204294	-0.0180718	0.00676148	-0.0114449	-0.0526983	-0.00123611	0.0108501	-0.0688835	0.00400736	-0.0577413	-0.0535255	-0.0399419	-0.0581651	-0.0751339	0	-0.0434004	-0.0265108	-0.0706749	-0.0413296	-0.00658108	-0.0488904	-0.0663344	0.432539	3.50586	0.0054266	0.0543576	-0.0626261	1.26474
P04792	HSPB1	Heat shock protein beta-1 OS=Homo sapiens OX=9606 GN=HSPB1 PE=1 SV=2	-0.0302363	0.0302363	0.0257686	0.0176528	0.0466676	0.0198687	0.115171	-0.00732552	-0.0177612	0.00534221	-0.101386	-0.0732337	-0.0446	-0.0310172	-0.0599727	-0.0642613	0	0.0128228	0.00572656	0.0776454	0.0140071	-0.0294899	0.0351995	-0.0389231	0.583419	4.48803	0.00545003	0.0545156	-0.084193	1.26348
A0A087WT44	HMOX2	Isoform of P30519, Heme oxygenase (biliverdin-producing) OS=Homo sapiens OX=9606 GN=HMOX2 PE=1 SV=1	0.0557768	-0.0557768	0.159073	0.123055	0.0374992	0.0933786	0.11264	0.140082	0.100576	-0.0150446	0.0653038	0.113312	0.136104	0.281347	0.33439	0.0951071	0	-0.0762118	-0.0531201	0.00666528	-0.0260266	-0.00524457	-0.119244	-0.00145378	0.403468	3.85062	0.00549761	0.0549145	0.151554	1.26031
Q13325	IFIT5	Interferon-induced protein with tetratricopeptide repeats 5 OS=Homo sapiens OX=9606 GN=IFIT5 PE=1 SV=1	-0.0101238	0.0101238	-0.138322	-0.0146933	-0.0409348	-0.0844013	-0.092468	-0.153877	-0.130315	-0.102418	-0.0549377	-0.129387	-0.0627274	-0.078119	-0.0789091	-0.114389	0	-0.0206083	-0.0512294	-0.0313845	-0.0486023	-0.0576369	-0.0531881	-0.0677974	0.572502	6.3	0.0055339	0.0550714	-0.10184	1.25907
P82932	MRPS6	28S ribosomal protein S6, mitochondrial OS=Homo sapiens OX=9606 GN=MRPS6 PE=1 SV=3	0.00446894	-0.00446894	-0.118037	-0.132847	-0.132396	0.0306113	-0.462078	0.0211108	-0.217574	-0.185029	-0.542511	-0.0273437	-0.193477	-0.491863	-0.162874	-0.411303	0	-0.038277	-0.0279721	0.0354727	0.00888726	0.125493	0.0713952	-0.0148562	0.399376	5.14658	0.0055399	0.0550714	-0.329689	1.25907
A0A0B4J269	readthrough,	readthrough, G_PROTEIN_RECEP_F1_2 domain-containing protein OS=Homo sapiens OX=9606 PE=1 SV=1	-0.0184244	0.0184244	-0.0124409	0.0235662	-0.0315453	0.0113043	-0.00221143	0.0154895	0.0465558	0.0292883	-0.00362978	0.0236569	0.0137086	0.0523709	0.103014	0.0586619	0	-0.0152036	-0.0182107	-0.0908843	-0.0195153	-0.0709606	-0.0786139	-0.133415	0.563017	3.23806	0.00554292	0.0550714	0.0722466	1.25907
Q13950-2	RUNX2	Isoform of Q13950, Isoform 2 of Runt-related transcription factor 2 OS=Homo sapiens OX=9606 GN=RUNX2 PE=1 SV=2	-0.0211385	0.0211385	-0.000322808	0.0990243	0.0975902	0.025642	0.172887	0.0842452	0.0252951	0.0562661	0.0643747	0.0821924	0.0399875	0.0693711	0.12478	0.157338	0	0.0170473	0.000795656	-0.0216697	0.0825047	0.0308304	0.0346734	0.0546448	0.271958	3.06978	0.00554426	0.0550714	0.0906751	1.25907
Q13303	KCNAB2	Voltage-gated potassium channel subunit beta-2 OS=Homo sapiens OX=9606 GN=KCNAB2 PE=1 SV=2	-0.0224984	0.0224984	0.0476378	0.0161795	0.0406901	0.0254892	0.072053	0.0400614	0.0471144	0.0368096	0.0325346	0.0284622	0.0293708	0.0457751	0.0409002	0.0530978	0	0.0225536	0.00579004	0.0141146	0.0306575	0.0113828	-0.00215706	0.0282726	0.544018	6.3	0.00556163	0.0551113	0.0429753	1.25876
C9J2Y9	POLR2B	Isoform of P30876, DNA-directed RNA polymerase subunit beta OS=Homo sapiens OX=9606 GN=POLR2B PE=1 SV=2	0.007434	-0.007434	-0.00183707	-0.0141337	-0.024023	-0.00812679	0.00739133	-0.0260434	0.00441119	-0.000391538	-0.0297278	-0.0500316	-0.0304931	-0.0350366	-0.0109232	-0.049283	0	-0.0438879	-0.0346352	-0.00125499	-0.0289508	-0.00881026	-0.0251024	-0.0176528	0.568182	4.25528	0.00556375	0.0551113	-0.0290663	1.25876
Q9H5N1	RABEP2	Rab GTPase-binding effector protein 2 OS=Homo sapiens OX=9606 GN=RABEP2 PE=1 SV=2	-0.00291566	0.00291566	0.0526239	0.0398795	0.0577259	0.0299041	0.0293878	0.0508059	0.0444797	0.00302802	0.0927304	0.0880635	0.0736979	0.0184336	0.0266046	0.080054	0	0.0437173	0.0430505	0.0096248	0.0449391	-0.00520623	0.0173046	0.0330203	0.331303	4.32223	0.00561895	0.0555808	0.0376991	1.25508
P25398	RPS12	40S ribosomal protein S12 OS=Homo sapiens OX=9606 GN=RPS12 PE=1 SV=3	-0.0113165	0.0113165	-0.00283096	0.0156112	-0.000505359	0.0196552	0.0335951	0.0196087	-0.0421889	-0.00037469	-0.0310942	-0.137189	-0.0228968	-0.0568028	-0.034921	-0.0580795	0	0.0119917	-0.0106648	-0.00410812	-0.0545727	-0.0553203	-0.0326383	-0.102041	0.581341	4.51405	0.00563506	0.0556629	-0.0653444	1.25443
Q9NV88	INTS9	Integrator complex subunit 9 OS=Homo sapiens OX=9606 GN=INTS9 PE=1 SV=2	0.0150558	-0.0150558	-0.0823654	-0.0558107	-0.103423	-0.103445	-0.247514	-0.115825	-0.0808942	-0.0831404	-0.155156	-0.0499833	-0.119018	-0.145753	-0.179563	-0.0493144	0	-0.0210412	0.0188982	0.0352516	0.0343744	0.05907	0.0300381	0.101854	0.548429	6.04885	0.00564977	0.0556713	-0.121166	1.25437
P35749	MYH11	Myosin-11 OS=Homo sapiens OX=9606 GN=MYH11 PE=1 SV=3	-0.0514791	0.0514791	0.0799056	0.0932603	0.0549958	-0.00126482	0.0704529	0.0600015	0.0284727	0.046513	0.106526	0.0955909	0.127761	0.152519	0.0407115	0.0959768	0	0.0558249	0.0934375	0.0665905	0.0507323	0.110087	0.142628	0.0553779	0.397785	6.3	0.00565155	0.0556713	0.152855	1.25437
P02787	TF	Serotransferrin OS=Homo sapiens OX=9606 GN=TF PE=1 SV=3	0.0258109	-0.0258109	0.0643315	0.0302558	0.0397919	0.00129205	0.0509859	0.0421791	0.0637708	0.0731398	0.0362026	0.124179	0.0500091	0.0781917	0.013055	0.0947486	0	-0.0286593	0.00815135	0.0261405	0.00723247	0.00657662	0.000823076	-0.0233889	0.433142	6.18319	0.00567698	0.0558445	0.083196	1.25302
Q14511	NEDD9	Enhancer of filamentation 1 OS=Homo sapiens OX=9606 GN=NEDD9 PE=1 SV=1	-0.0294654	0.0294654	0.0442339	-0.00899312	0.040829	0.0796293	0.0257054	0.0377574	0.061939	0.0369494	0.0680207	0.0834523	-0.00186965	0.0836473	0.0500371	0.0885996	0	0.0339897	0.0203454	-0.0157827	0.0566395	0.0196407	0.0141283	0.0540982	0.409999	6.21691	0.00573606	0.0563479	0.0789786	1.24912
M0R0N4	AP2S1	Isoform of P53680, AP complex subunit sigma OS=Homo sapiens OX=9606 GN=AP2S1 PE=1 SV=1	-0.0358646	0.0358646	-0.00716739	0.0401927	-0.0475933	0.0368391	-0.00427787	-0.139246	-0.0159954	-0.0188165	-0.00898849	0.0196323	0.0401978	0.106629	0.142279	0.119739	0	-0.0365909	-0.0868301	-0.134086	-0.0569869	-0.083813	-0.111025	-0.0801988	0.57988	3.5825	0.00576832	0.0565566	0.143702	1.24752
P36578	RPL4	60S ribosomal protein L4 OS=Homo sapiens OX=9606 GN=RPL4 PE=1 SV=5	0.0173986	-0.0173986	0.0133475	0.0352482	0.0570338	0.0836111	0.0159124	0.0642324	0.0577211	0.112839	0.0667895	0.111147	0.0487845	0.0796439	0.0576298	0.0266616	0	-0.0620348	0.0541717	-0.0656809	0.0118209	0.0173285	-0.122628	-0.0918895	0.56245	5.97401	0.00577319	0.0565566	0.0651688	1.24752
Q6UB99	ANKRD11	Ankyrin repeat domain-containing protein 11 OS=Homo sapiens OX=9606 GN=ANKRD11 PE=1 SV=3	0.0066394	-0.0066394	0.0699294	0.0688598	0.0199632	0.00322341	0.0706999	0.065137	0.0543108	0.0796375	0.00585476	0.0637661	0.0940471	0.0538449	0.0817934	0.0388403	0	0.0269136	0.00185182	-0.0540635	0.0444771	0.0598367	-0.0272394	-0.0564818	0.473306	6.3	0.00580115	0.0567373	0.0549897	1.24613
C9JC32	TRAK1	Isoform of Q9UPV9, Trafficking kinesin-binding protein 1 OS=Homo sapiens OX=9606 GN=TRAK1 PE=1 SV=1	0.089974	-0.089974	0.525017	0.0495847	0.0531677	0.202386	0.180495	0.0214305	0.284039	0.281873	0.392484	0.390698	0.340291	0.364502	0.0881684	0.456851	0	0.0612257	-0.0681934	0.0203547	-0.037528	-0.0136101	-0.00957101	0.001851	0.380084	4.5813	0.00580756	0.0567373	0.235636	1.24613
Q96CT7	CCDC124	Coiled-coil domain-containing protein 124 OS=Homo sapiens OX=9606 GN=CCDC124 PE=1 SV=1	0.00338217	-0.00338217	0.0458667	0.00853127	-0.0316286	0.00558926	0.0391204	0.0675763	0.0140205	0.0026495	0.0201724	0.054868	0.0563953	0.0323213	0.045395	0.0601252	0	0.0106306	0.00921628	0.0119191	0.00327206	-0.0229156	0.0163577	0.0128037	0.393674	3.93914	0.00583808	0.0568409	0.0568938	1.24534
P13500	CCL2	C-C motif chemokine 2 OS=Homo sapiens OX=9606 GN=CCL2 PE=1 SV=1	-0.0220961	0.0220961	0.118083	0.0817804	0.0365731	0.085748	0.110436	0.180876	0.16422	0.152527	0.139462	0.182172	0.0903003	0.120604	0.0436691	0.0674533	0	0.165456	0.114485	0.0674511	0.127289	0.194562	0.229706	0.178415	0.579114	6.3	0.00583916	0.0568409	0.127327	1.24534
P16284	PECAM1	Platelet endothelial cell adhesion molecule OS=Homo sapiens OX=9606 GN=PECAM1 PE=1 SV=2	-0.00958731	0.00958731	0.0409682	-0.000274357	0.0318678	0.0413187	0.0351181	-0.00726685	0.00305322	0.0172015	0.0387291	0.072995	0.0457608	0.0237178	0.0676379	0.0284365	0	-0.00229602	-0.0620747	-0.0823987	-0.0517897	-0.075406	-0.0598739	-0.099706	0.406576	4.28646	0.00584211	0.0568409	0.0327656	1.24534
Q9H270	VPS11	Vacuolar protein sorting-associated protein 11 homolog OS=Homo sapiens OX=9606 GN=VPS11 PE=1 SV=1	-0.00750202	0.00750202	-0.00383314	0.0150401	0.0093921	-0.000523074	0.0062879	-0.048051	-0.0688434	-0.0590364	-0.017278	-0.0217429	-0.00824789	-0.0417113	-0.0335147	-0.0729021	0	-0.000697351	-0.00416102	0.01026	-0.00174844	-0.0352287	-0.00202658	-0.0211249	0.544907	5.00905	0.00586011	0.0569382	-0.0429192	1.2446
Q96P20	NLRP3	NACHT, LRR and PYD domains-containing protein 3 OS=Homo sapiens OX=9606 GN=NLRP3 PE=1 SV=3	0.0195837	-0.0195837	0.153781	0.266845	0.133513	0.153927	0.129035	0.118237	0.0087106	0.397613	0.0620627	0.538933	0.280403	0.262131	0.198118	0.30617	NA	NA	NA	NA	NA	NA	NA	NA	0.399307	6.3	0.00589388	0.0570937	0.387634	1.24341
P61978-3	HNRNPK	Isoform of P61978, Isoform 3 of Heterogeneous nuclear ribonucleoprotein K OS=Homo sapiens OX=9606 GN=HNRNPK PE=1 SV=1	-0.00800774	0.00800774	0.00495324	0.0388204	0.0146809	0.0323398	0.0527083	0.0245861	0.0103674	0.00473358	0.00944989	0.0282293	0.0448592	0.022889	0.0332693	0.0575567	0	-0.00937882	-0.0291649	-0.0225314	-0.0269602	-0.0277239	-0.0236827	0.00871571	0.300107	3.5945	0.00589628	0.0570937	0.0300265	1.24341
E7EPW5	ST7	Isoform of Q9NRC1, Suppressor of tumorigenicity 7 protein OS=Homo sapiens OX=9606 GN=ST7 PE=1 SV=1	0.134571	-0.134571	-0.066885	-0.192352	-0.0542628	-0.182671	-0.241136	-0.141836	-0.0898133	-0.189219	-0.139345	-0.213564	-0.215447	-0.244381	-0.180985	-0.146953	NA	NA	NA	NA	NA	NA	NA	NA	0.443664	6.3	0.00590016	0.0570937	-0.21504	1.24341
Q5VVQ6	YOD1	Ubiquitin thioesterase OTU1 OS=Homo sapiens OX=9606 GN=YOD1 PE=1 SV=1	-0.00427029	0.00427029	-0.0591937	-0.0573324	-0.0776806	-0.0217577	-0.0764136	-0.108071	-0.076298	-0.0927817	-0.0175237	-0.135112	-0.0808461	-0.0606664	-0.161957	-0.0180533	0	-0.1316	-0.134025	-0.09018	-0.0749698	-0.111903	0.0128516	-0.0888943	0.465818	6.3	0.0059321	0.0573248	-0.0924435	1.24166
P27816-5	MAP4	Isoform of P27816, Isoform 5 of Microtubule-associated protein 4 OS=Homo sapiens OX=9606 GN=MAP4 PE=1 SV=3	0.0605427	-0.0605427	-0.00823165	0.0316466	0.0476353	-0.0283257	0.000662858	-0.00301083	0.0328714	-0.0181654	0.0829539	0.113385	0.104287	0.0479444	0.0777715	0.171991	0	-0.257275	-0.265945	-0.496785	-0.311296	-0.289814	-0.304688	-0.24637	0.556947	4.27346	0.00596209	0.0574036	0.0965013	1.24106
P48553	TRAPPC10	Trafficking protein particle complex subunit 10 OS=Homo sapiens OX=9606 GN=TRAPPC10 PE=1 SV=2	-0.0178943	0.0178943	0.0151646	0.0308667	-0.0145738	0.014599	0.0173305	-0.0107214	-0.0443984	-0.0249951	-0.0266297	-0.0173511	-0.0292846	-0.0309153	-0.0201772	-0.0994222	0	-0.0262506	-0.00486891	-0.0128326	-0.0113284	-0.0227949	-0.0307143	0.0104237	0.502839	3.46523	0.00597772	0.0574036	-0.0628233	1.24106
Q6ZT12	UBR3	E3 ubiquitin-protein ligase UBR3 OS=Homo sapiens OX=9606 GN=UBR3 PE=2 SV=2	-0.0318769	0.0318769	0.0431744	0.0255737	0.0767918	0.159507	0.0650139	0.0363996	0.148153	0.071499	0.110291	0.0457731	0.0908186	0.103586	0.0985466	0.0592368	0	0.0481491	-0.0156115	0.131129	0.057193	0.0941237	0.0457613	-0.00892075	0.560427	5.97706	0.00597828	0.0574036	0.0888042	1.24106
Q96A33	CCDC47	PAT complex subunit CCDC47 OS=Homo sapiens OX=9606 GN=CCDC47 PE=1 SV=1	0.0378669	-0.0378669	0.0936016	0.0892091	0.120026	0.0380065	0.0780686	0.107415	0.064481	0.0398279	0.0996119	0.0947291	0.0514368	0.0763599	0.174398	0.0699886	0	-0.0784483	-0.0799228	-0.111865	-0.0954359	0.00389951	-0.0950328	-0.0325576	0.508285	6.3	0.00598271	0.0574036	0.0855319	1.24106
P19838	NFKB1	Nuclear factor NF-kappa-B p105 subunit OS=Homo sapiens OX=9606 GN=NFKB1 PE=1 SV=2	0.00436569	-0.00436569	0.00749789	0.00873712	-0.012329	-0.0154517	0.00371576	-0.0266766	-0.014054	-0.00666138	-0.0178741	-0.0432908	-0.00278374	-0.00344027	-0.0380371	-0.075718	0	0.0265115	-0.00769316	0.0137109	-0.0100393	-0.0140606	-0.0243562	-0.00617412	0.548071	3.04141	0.00598349	0.0574036	-0.0492135	1.24106
G3V203	RPL18	Isoform of Q07020, 60S ribosomal protein L18 OS=Homo sapiens OX=9606 GN=RPL18 PE=1 SV=1	0.00918892	-0.00918892	0.157724	0.0691623	0.0831076	0.0367605	0.185653	0.154548	0.127772	0.112449	0.201472	0.120857	0.121798	0.177632	0.0916642	0.044085	0	-0.0419145	0.124362	-0.167832	0.114874	-0.00221714	0.064478	-0.0346758	0.577525	6.3	0.00598861	0.0574036	0.138175	1.24106
Q9C099	LRRCC1	Leucine-rich repeat and coiled-coil domain-containing protein 1 OS=Homo sapiens OX=9606 GN=LRRCC1 PE=1 SV=2	-0.0630273	0.0630273	-0.0786636	-0.0360194	-0.152126	0.0399386	0.000172734	0.0234052	0.0246668	-0.0127176	0.016408	0.147934	0.176536	0.107781	0.132364	0.12678	NA	NA	NA	NA	NA	NA	NA	NA	0.577407	4.17545	0.00599988	0.0574327	0.161979	1.24084
P52824	DGKQ	Diacylglycerol kinase theta OS=Homo sapiens OX=9606 GN=DGKQ PE=1 SV=2	-0.123807	0.123807	0.0925384	0.0918912	-0.00963562	-0.0100016	0.130827	0.326117	0.0762586	0.206832	0.121106	0.160061	0.197529	0.103297	0.215579	0.249301	0	-0.0142089	-0.0771172	-0.0300381	-0.0259281	-0.0926292	-0.0657064	-0.0108774	0.385285	5.78379	0.00600777	0.0574327	0.322321	1.24084
Q5T8I3	FAM102B	Protein FAM102B OS=Homo sapiens OX=9606 GN=FAM102B PE=1 SV=2	-0.0083469	0.0083469	0.0367736	0.0794493	0.0798794	0.0722833	0.0141691	0.0763712	0.0375308	0.0823029	0.0200039	0.0886931	0.063191	0.0875249	0.0449537	0.0776791	0	0.0190431	-0.0210143	-0.0920342	-0.0709653	-0.031045	0.0124576	-0.0229337	0.572974	6.13461	0.00605382	0.0577953	0.0620484	1.23811
Q5MNZ6	WDR45B	WD repeat domain phosphoinositide-interacting protein 3 OS=Homo sapiens OX=9606 GN=WDR45B PE=1 SV=2	0.00484177	-0.00484177	0.00225587	0.0103612	0.0167938	0.0180006	-0.0163882	-0.0130462	0.0532331	0.0304473	0.0132582	0.0198216	0.0213462	0.0437179	0.0202357	0.0418359	0	0.0428312	0.0138067	-0.0253515	-0.0181983	-0.0180934	-0.0273195	-0.00482887	0.576671	4.75222	0.00607027	0.0578655	0.028696	1.23758
Q96IY1	NSL1	Kinetochore-associated protein NSL1 homolog OS=Homo sapiens OX=9606 GN=NSL1 PE=1 SV=3	-0.0220113	0.0220113	-0.021906	-0.018354	-0.0367346	0.0161192	0.047091	-0.050677	-0.0251552	-0.0295931	0.0103463	-0.0697304	-0.071325	-0.0785051	-0.0891638	-0.0591598	0	-0.00815447	0.0745144	0.0528642	0.0514222	0.025948	0.0120665	-0.022191	0.489693	3.91099	0.00607742	0.0578655	-0.0705288	1.23758
Q9HAJ7	SAP30L	Histone deacetylase complex subunit SAP30L OS=Homo sapiens OX=9606 GN=SAP30L PE=1 SV=1	0.0409943	-0.0409943	0.0621089	0.0405274	-0.037821	-0.00497902	-0.0668786	0.0150101	-0.0348195	-0.0715839	-0.0228396	-0.276244	-0.0488085	-0.0486332	-0.136999	-0.217811	0	-0.129963	-0.0678169	-0.0584463	-0.0419858	-0.00756841	-0.0474907	-0.122256	0.450481	4.49959	0.00609312	0.0579376	-0.126248	1.23704
P53367	ARFIP1	Arfaptin-1 OS=Homo sapiens OX=9606 GN=ARFIP1 PE=1 SV=2	-0.0180965	0.0180965	0.0112109	0.0390742	0.0264336	0.0265761	0.0826438	0.0118758	0.00106286	0.00984354	0.0235012	0.00616529	0.0632052	0.0741761	0.0471907	0.0977667	0	0.0403416	0.0223113	0.0671816	0.0405259	0.0184138	0.0183059	0.0212253	0.489871	3.65268	0.00610984	0.058019	0.0554869	1.23643
O14672	ADAM10	Disintegrin and metalloproteinase domain-containing protein 10 OS=Homo sapiens OX=9606 GN=ADAM10 PE=1 SV=1	0.00709532	-0.00709532	-0.0248921	-0.021856	0.0101274	-0.0322639	-0.0296986	-0.0352047	0.00944654	-0.0129616	-0.0589942	-0.043715	-0.0372659	7.07107e-05	-0.0492829	-0.107768	0	-0.140915	0.0194581	-0.137799	-0.106226	-0.121281	-0.172319	-0.0905673	0.38137	4.22332	0.00613631	0.058158	-0.0381866	1.23539
A0A2R8YE10	VPS45	Isoform of Q9NRW7, Vacuolar protein sorting-associated protein 45 OS=Homo sapiens OX=9606 GN=VPS45 PE=1 SV=1	-0.00204235	0.00204235	0.0593301	0.0744941	0.104199	0.0878105	0.0695577	0.171045	0.0380893	0.0637107	0.0997536	0.0797481	0.127194	0.0734013	0.04612	0.0500218	0	-0.00813118	0.0330163	0.116837	0.0563192	0.0866675	0.0862913	0.100415	0.575846	6.06761	0.00615002	0.058158	0.084221	1.23539
Q6IC98	GRAMD4	GRAM domain-containing protein 4 OS=Homo sapiens OX=9606 GN=GRAMD4 PE=1 SV=1	-0.0598026	0.0598026	0.0491694	0.0108711	0.0717365	0.097201	0.0929224	0.0161917	0.102668	-0.0115023	0.0589235	0.0857353	0.0776459	0.0722463	0.094731	0.150027	0	0.00168695	-0.0829928	0.0842837	0.0841348	0.0417472	0.0202751	-0.0263731	0.37833	4.78838	0.00615199	0.058158	0.157534	1.23539
J3KPG9	CSAD	Isoform of Q9Y600, Cysteine sulfinic acid decarboxylase (Fragment) OS=Homo sapiens OX=9606 GN=CSAD PE=1 SV=1	0.00359826	-0.00359826	0.172003	0.00411922	-0.126489	0.0228499	-0.137041	0.118175	-0.23817	-0.279516	-0.10322	0.0767726	-0.156556	-0.309475	-0.258818	-0.257141	0	0.101162	0.032658	-0.0802115	-0.00198947	0.0342708	-0.126761	-0.00602104	0.440165	3.84729	0.00615714	0.058158	-0.282389	1.23539
Q9H832	UBE2Z	Ubiquitin-conjugating enzyme E2 Z OS=Homo sapiens OX=9606 GN=UBE2Z PE=1 SV=2	0.0170689	-0.0170689	-0.01138	-0.00475706	0.0339083	-0.050658	-0.0370445	-0.0154647	-0.00353891	-0.0671296	0.0669634	-0.0286874	0.011794	0.0947414	0.118021	0.0779679	0	0.103982	0.0661349	0.0878654	0.0918747	0.0745571	0.0740113	0.0700175	0.575602	3.61163	0.00617378	0.0581648	0.108909	1.23534
P09417	QDPR	Dihydropteridine reductase OS=Homo sapiens OX=9606 GN=QDPR PE=1 SV=2	-0.0114801	0.0114801	-0.0184321	0.0207702	0.0255508	0.010859	0.0211174	0.00676288	0.00417512	0.000716312	0.0356189	0.00997002	0.0535855	0.0163689	0.0191492	0.0650679	0	-0.00634751	-0.0222459	-0.0179542	0.00205779	-0.0134248	-0.0289638	-0.045612	0.437481	3.95243	0.00617419	0.0581648	0.0347254	1.23534
Q92783	STAM	Signal transducing adapter molecule 1 OS=Homo sapiens OX=9606 GN=STAM PE=1 SV=3	-0.00875435	0.00875435	0.0284239	0.0607684	0.0520366	0.0528468	-0.0225445	-0.00169826	0.0234013	0.00660715	0.0483935	0.013035	0.0823236	0.0753426	0.0677863	0.0809168	0	0.00249373	0.0244831	-0.00430895	0.0131588	-0.000921059	0.0227463	-0.0249551	0.549478	3.94088	0.00619722	0.0583046	0.0599456	1.2343
Q9NXC2	GFOD1	Glucose-fructose oxidoreductase domain-containing protein 1 OS=Homo sapiens OX=9606 GN=GFOD1 PE=1 SV=1	0.0608869	-0.0608869	0.0949176	-0.00462324	0.220347	0.0598268	0.0459446	0.180458	0.226476	0.276901	0.26823	0.218167	0.559809	0.0124633	0.609829	0.0325922	0	-0.0970569	-0.0634566	-0.0522713	-0.0411426	0.00134725	-0.0278391	-0.0250546	0.388807	4.97399	0.00620866	0.0583352	0.339114	1.23407
O75368	SH3BGRL	SH3 domain-binding glutamic acid-rich-like protein OS=Homo sapiens OX=9606 GN=SH3BGRL PE=1 SV=1	0.0163743	-0.0163743	0.0588213	0.062151	0.0442088	0.0490456	0.0321132	0.0420817	0.0512521	0.0135772	0.0326679	0.0160358	0.0442114	0.0516563	0.0458618	0.0698634	0	0.0416751	0.0215783	0.0422985	0.0259912	0.0351091	0.0251848	0.0100201	0.574593	6.3	0.00627279	0.0587436	0.0438137	1.23104
A6QL63	BTBD11	Ankyrin repeat and BTB/POZ domain-containing protein BTBD11 OS=Homo sapiens OX=9606 GN=BTBD11 PE=2 SV=3	0.0292468	-0.0292468	0.0414693	-0.0988032	0.037083	-0.0763103	-0.0286371	0.0210497	-0.0560806	-0.0377635	-0.1169	-0.000810315	-0.109799	-0.0911613	-0.093358	-0.116339	0	0.032104	-0.00289783	0.00516076	-0.0172118	0.0267005	-0.0290058	0.026697	0.446666	4.08201	0.00627992	0.0587436	-0.0991106	1.23104
O60814	H2BC12	Histone H2B type 1-K OS=Homo sapiens OX=9606 GN=H2BC12 PE=1 SV=3	0.0200782	-0.0200782	-0.294132	-0.0410403	-0.0224436	0.00563605	-0.0752608	-0.13871	-0.139547	0.0641337	-0.262644	-0.123209	-0.267424	-0.0660049	-0.250828	-0.279194	0	-0.0191184	-0.00643844	-0.40328	-0.262478	-0.13258	-0.0552824	0.0924582	0.400238	4.09017	0.0062803	0.0587436	-0.162431	1.23104
O43776	NARS1	Asparagine--tRNA ligase, cytoplasmic OS=Homo sapiens OX=9606 GN=NARS1 PE=1 SV=1	0.00637018	-0.00637018	0.0147399	0.0121436	0.0107217	0.0139426	0.00493836	0.0135869	0.0182344	-0.0261876	0.0221141	0.0648999	0.0208336	0.0248229	0.036917	0.0605985	0	0.0633785	0.069804	0.106309	0.0393069	0.0368159	0.0589814	0.0745855	0.542487	4.24736	0.00628512	0.0587436	0.0332507	1.23104
A0A7I2V4F0	DDX1	Isoform of Q92499, ATP-dependent RNA helicase DDX1 OS=Homo sapiens OX=9606 GN=DDX1 PE=4 SV=1	-0.0106976	0.0106976	0.00498162	-0.0121301	0.0184582	-0.010355	0.0271769	0.000257026	0.00100937	-0.0134408	-0.00923295	-0.0537496	-0.0278788	-0.0273636	-0.0238701	-0.0342531	0	-0.0192682	-0.031798	-0.0761741	-0.0324564	-0.0504727	-0.0615363	-0.031441	0.574232	4.47588	0.00630852	0.0588851	-0.0322309	1.22999
Q93009	USP7	Ubiquitin carboxyl-terminal hydrolase 7 OS=Homo sapiens OX=9606 GN=USP7 PE=1 SV=2	0.00978728	-0.00978728	-0.0132018	-0.00165466	0.0202617	-0.0100484	-0.0611515	-0.0389591	0.00985092	-0.00415766	-0.0344428	-0.064227	-0.0227454	-0.0255314	-0.0422624	-0.0650856	0	0.0273112	0.0284778	0.0296059	0.0251366	0.0125748	0.0106232	0.0101525	0.386842	4.24995	0.00633326	0.0590386	-0.0341802	1.22886
F6U1T9	PPP3R1	Isoform of P63098, Calcineurin subunit B type 1 OS=Homo sapiens OX=9606 GN=PPP3R1 PE=1 SV=1	-0.0163426	0.0163426	0.107492	0.0518494	0.0562406	0.0606968	0.0669346	0.0433952	0.11477	0.126887	0.100459	0.0498844	0.0580363	0.0526073	0.0480675	0.0528257	0	0.0576018	0.112801	0.0866683	0.0206787	0.0586398	0.0884682	0.0739929	0.573041	6.3	0.00642775	0.0597799	0.0707352	1.22345
Q96AZ6	ISG20	Interferon-stimulated gene 20 kDa protein OS=Homo sapiens OX=9606 GN=ISG20 PE=1 SV=2	-0.0425949	0.0425949	0.00321777	0.0414222	-0.010053	0.000609159	0.00978715	-0.0130954	-0.0303351	-0.071659	-0.0428859	-0.0699181	-0.0258397	-0.0446377	-0.0540652	-0.0666023	0	0.0426534	0.0252279	0.00746962	-0.00330861	-0.00290908	-0.00606664	0.0280397	0.532619	4.89537	0.00643508	0.0597799	-0.0551508	1.22345
Q9Y6I3	EPN1	Epsin-1 OS=Homo sapiens OX=9606 GN=EPN1 PE=1 SV=2	0.029077	-0.029077	0.00898774	0.0114759	0.0388024	0.043368	0.0666858	0.00806405	0.0497282	0.00139135	0.0102969	0.0239622	0.0639037	0.0397009	0.0514376	0.0800713	0	0.00141357	0.0179382	0.00710924	0.0114862	0.0101217	0.041458	0.0440373	0.375966	4.6809	0.00643796	0.0597799	0.084222	1.22345
Q9Y530	OARD1	ADP-ribose glycohydrolase OARD1 OS=Homo sapiens OX=9606 GN=OARD1 PE=1 SV=2	-0.015218	0.015218	-0.0908258	-0.0628518	-0.0546558	-0.0253502	-0.021446	-0.0846049	0.0253882	-0.0453352	-0.073453	-0.109303	-0.0567022	-0.0816404	-0.0889916	-0.075654	0	0.0388141	0.0210062	0.00249042	0.0603236	0.0267222	0.00951223	0.0449467	0.367169	4.24544	0.00645353	0.0598123	-0.0510632	1.22321
J3KMY8	ADGRB3	Isoform of O60242, Adhesion G protein-coupled receptor B3 OS=Homo sapiens OX=9606 GN=ADGRB3 PE=1 SV=1	0.0275569	-0.0275569	0.0280022	-0.0541669	-0.00962569	-0.0940112	-0.0465252	-0.0369478	-0.0955598	-0.0912984	-0.030149	-0.0930704	-0.108325	-0.0948443	-0.0238022	-0.0624896	0	-0.0959942	-0.0367226	-0.0567797	-0.0247758	-0.0470034	-0.0471569	-0.00415196	0.461174	5.63608	0.00645824	0.0598123	-0.0735786	1.22321
Q92947	GCDH	Glutaryl-CoA dehydrogenase, mitochondrial OS=Homo sapiens OX=9606 GN=GCDH PE=1 SV=1	0.0235309	-0.0235309	0.0635253	-0.00640151	0.0183628	-0.016736	0.0866909	0.0304305	0.0315347	0.017234	0.022139	0.020867	0.0513339	0.0254886	0.108393	0.0988581	0	-0.0234043	0.0197917	-0.00521186	-0.0441746	-0.0225256	0.0118006	-0.036794	0.497013	3.16907	0.00646676	0.0598133	0.0847571	1.2232
P21333	FLNA	Filamin-A OS=Homo sapiens OX=9606 GN=FLNA PE=1 SV=4	0.0921807	-0.0921807	-0.0693585	-0.158072	-0.040297	-0.217583	-0.279058	-0.0471227	-0.0543495	-0.133096	-0.0658827	-0.116279	-0.281692	-0.250787	-0.155709	-0.220611	NA	NA	NA	NA	NA	NA	NA	NA	0.381452	6.3	0.00647623	0.0598232	-0.307429	1.22313
O43294	TGFB1I1	Transforming growth factor beta-1-induced transcript 1 protein OS=Homo sapiens OX=9606 GN=TGFB1I1 PE=1 SV=2	0.0142541	-0.0142541	0.00648712	0.000542626	0.0216043	0.0514638	0.00378953	0.0288577	0.0572512	0.0126793	-0.0228945	-0.0663566	-0.0333814	0.000882916	-0.0593381	-0.0914072	0	-0.0136447	-0.0247441	-0.0703841	-0.0475738	-0.0549052	-0.0510288	-0.107537	0.571595	4.16989	0.00657502	0.0606416	-0.0612916	1.21723
Q96N66	MBOAT7	Lysophospholipid acyltransferase 7 OS=Homo sapiens OX=9606 GN=MBOAT7 PE=1 SV=2	-0.0832024	0.0832024	-0.111669	0.0717802	-0.0449845	0.0408749	-0.027274	-0.0814452	-0.0980656	0.113963	-0.0633144	-0.0990013	-0.209733	-0.132947	-0.254385	-0.198298	NA	NA	NA	NA	NA	NA	NA	NA	0.565439	3.77777	0.0065834	0.0606416	-0.213685	1.21723
O14562	UBFD1	Ubiquitin domain-containing protein UBFD1 OS=Homo sapiens OX=9606 GN=UBFD1 PE=1 SV=2	0.0233149	-0.0233149	-0.00190106	-0.00779809	-0.0168984	-0.0193931	-0.0219383	0.00896978	0.0313332	0.00645969	0.0545588	-0.000739486	0.0529969	0.0113134	0.0564008	0.0655986	0	0.013402	0.00687984	-0.0136184	0.0325284	0.00628092	0.0253666	0.0171228	0.571445	3.61702	0.00659037	0.0606416	0.0642077	1.21723
Q5C9Z4	NOM1	Nucleolar MIF4G domain-containing protein 1 OS=Homo sapiens OX=9606 GN=NOM1 PE=1 SV=1	0.036143	-0.036143	0.0158046	-0.0339305	0.0524727	-0.0676903	-0.00650517	-0.0191051	-0.124517	-0.00520839	0.0381984	-0.130312	0.0542	-0.00447726	-0.126786	-0.450925	0	-0.0338061	-0.049855	0.0124566	0.0640352	-0.121226	-0.0215009	-0.103781	0.571189	3.04244	0.00661682	0.0606971	-0.274403	1.21683
A0A6Q8PFL5	LRSAM1	Isoform of Q6UWE0, E3 ubiquitin-protein ligase LRSAM1 OS=Homo sapiens OX=9606 GN=LRSAM1 PE=1 SV=1	-0.00043565	0.00043565	-0.0164541	0.0006038	0.00618844	-0.0157008	-0.0278181	-0.00509804	0.00173002	0.00994546	0.0389001	0.0368611	0.00619349	0.00477784	0.0174384	0.026284	0	0.00561743	0.0275439	0.0620553	0.0127588	-0.0102812	0.0219062	0.0097586	0.571163	4.50738	0.00661953	0.0606971	0.0275704	1.21683
Q9NSU2-1	TREX1	Isoform of Q9NSU2, Isoform 1 of Three-prime repair exonuclease 1 OS=Homo sapiens OX=9606 GN=TREX1 PE=1 SV=2	0.00275665	-0.00275665	0.0323917	0.00882523	0.0534251	-0.0101496	0.0278996	-0.0541159	-0.0258945	-0.0195445	0.00127488	-0.093196	-0.0927934	-0.0754757	-0.0397375	-0.0536197	0	0.0674217	0.120994	0.130533	0.135869	-0.0192001	0.0458295	0.0545602	0.550763	4.50099	0.00663185	0.0606971	-0.0724088	1.21683
Q92882	OSTF1	Osteoclast-stimulating factor 1 OS=Homo sapiens OX=9606 GN=OSTF1 PE=1 SV=2	-0.0103838	0.0103838	0.0276496	-0.0131369	-0.0121375	0.0200212	0.0572256	0.0428364	0.00307426	-0.00171902	0.00541134	0.0683429	0.0750686	0.0194761	0.0367119	0.0855874	0	-0.0106174	0.0112094	0.0369944	-0.00329161	-0.0214887	-0.0294344	-0.0331605	0.403422	3.58799	0.00663795	0.0606971	0.0597988	1.21683
O60675	MAFK	Transcription factor MafK OS=Homo sapiens OX=9606 GN=MAFK PE=1 SV=1	-0.209954	0.209954	0.191627	0.302384	0.23456	0.223597	0.307788	0.211254	0.241709	0.341868	0.25918	0.378414	0.237046	0.442719	0.122741	0.399671	0	0.207581	0.13962	0.233414	0.224626	0.272413	0.200126	0.193378	0.471334	6.3	0.00663912	0.0606971	0.310632	1.21683
Q99570	PIK3R4	Phosphoinositide 3-kinase regulatory subunit 4 OS=Homo sapiens OX=9606 GN=PIK3R4 PE=1 SV=3	-0.00767518	0.00767518	-0.0235017	0.0106322	-0.0518793	-0.0374458	-0.0777531	-0.0630874	-0.0598501	-0.0363369	-0.00102177	-0.0787805	-0.0511004	-0.0636506	-0.0364772	-0.0227799	0	-0.00915459	-0.0112754	0.00538508	-0.00497832	-0.00594152	-0.0498872	-0.0261252	0.570892	5.78974	0.00664753	0.0606971	-0.0489541	1.21683
P49914	MTHFS	5-formyltetrahydrofolate cyclo-ligase OS=Homo sapiens OX=9606 GN=MTHFS PE=1 SV=2	0.00920093	-0.00920093	-0.0672786	-0.0101664	-0.056399	-0.0560987	-0.0752151	-0.113402	-0.08809	-0.0305579	-0.0640953	-0.0637455	-0.0664679	-0.00980103	-0.0702392	-0.0713308	0	-0.0177337	0.00404838	0.0177553	0.00501339	-0.0447931	-0.00351856	0.0228297	0.570711	6.07282	0.00666639	0.0607913	-0.0645898	1.21616
P07093-3	SERPINE2	Isoform of P07093, Isoform 3 of Glia-derived nexin OS=Homo sapiens OX=9606 GN=SERPINE2 PE=1 SV=1	0.0466108	-0.0466108	-0.0139651	-0.0337217	0.020758	-0.0849879	0.0229626	-0.115986	-0.00337875	-0.0788482	-0.0836051	-0.143149	-0.126099	-0.041872	-0.0963332	-0.0901999	NA	NA	NA	NA	NA	NA	NA	NA	0.388204	4.87451	0.00669891	0.0609301	-0.0993399	1.21517
O43639	NCK2	Cytoplasmic protein NCK2 OS=Homo sapiens OX=9606 GN=NCK2 PE=1 SV=2	0.00787631	-0.00787631	0.0534101	0.0711704	0.0558418	0.103472	0.0879193	0.0500743	0.0798411	0.101781	0.0384482	0.0962161	0.0623769	0.0570817	0.0108599	0.0395948	0	0.0147349	0.0269694	0.0335891	0.0319295	0.0436391	0.0243466	0.0591032	0.570252	6.3	0.00671431	0.0609301	0.0617845	1.21517
P35232	PHB	Prohibitin OS=Homo sapiens OX=9606 GN=PHB PE=1 SV=1	-0.0871575	0.0871575	-0.546709	-0.0639037	-0.00285102	-0.0123077	0.103198	-0.137801	-0.192864	0.100165	-0.47113	-0.193851	-0.573789	-0.269848	-0.549533	-0.458601	0	0.32886	0.830132	-0.264949	0.0265176	0.264314	0.500627	0.698089	0.53685	4.05085	0.00671493	0.0609301	-0.400434	1.21517
Q9HCU8	POLD4	DNA polymerase delta subunit 4 OS=Homo sapiens OX=9606 GN=POLD4 PE=1 SV=1	0.0092138	-0.0092138	0.0366241	0.0348957	-0.0510337	-0.00497393	-0.0385365	0.0161479	0.0369806	0.0500083	-0.0174876	-0.0348885	0.0222295	0.0422549	0.094208	0.103811	0	-0.0137966	-0.0764113	-0.136304	-0.0290554	-0.0978723	-0.0513946	-0.0922948	0.570237	3.4833	0.00671582	0.0609301	0.0970287	1.21517
P62820	RAB1A	Ras-related protein Rab-1A OS=Homo sapiens OX=9606 GN=RAB1A PE=1 SV=3	0.0182537	-0.0182537	-0.0138639	-0.0117991	0.00106838	0.00574639	-0.0579139	-0.0313862	0.0137111	-0.0112011	0.00429108	0.013089	0.00920767	0.04394	0.0657373	0.0456659	0	-0.00183759	0.0666819	0.062389	0.0276626	0.0624649	0.00743864	-0.00834304	0.569979	3.50764	0.00674286	0.0610412	0.0642962	1.21438
O00462	MANBA	Beta-mannosidase OS=Homo sapiens OX=9606 GN=MANBA PE=1 SV=3	0.0122553	-0.0122553	0.0458848	-0.00140097	-0.0123178	0.00661188	0.0436696	0.00399968	0.0165109	0.0370808	0.054748	0.0125221	0.0016177	0.0449774	0.0604851	0.0492014	0	0.0164445	0.0440925	0.0665795	0.0226161	0.0124216	0.0419742	-0.0131347	0.388452	3.52515	0.00674522	0.0610412	0.049233	1.21438
P48047	ATP5PO	ATP synthase subunit O, mitochondrial OS=Homo sapiens OX=9606 GN=ATP5PO PE=1 SV=1	-0.0159631	0.0159631	-0.22443	-0.0538102	-0.0109476	0.0169457	0.000734668	-0.102335	-0.0519563	0.0733325	-0.201301	-0.114015	-0.257968	-0.113669	-0.246919	-0.169088	0	0.0638327	0.340599	-0.153567	-0.0788551	0.00994594	0.0966808	0.207761	0.547288	4.05916	0.00680757	0.0615273	-0.167549	1.21093
Q8IVM0	CCDC50	Coiled-coil domain-containing protein 50 OS=Homo sapiens OX=9606 GN=CCDC50 PE=1 SV=1	-0.0185688	0.0185688	0.0363167	-0.00219104	0.00874358	0.0260633	0.0432075	0.00845293	0.0309091	0.00492377	0.0760464	0.0338054	0.014077	0.0518935	0.0415553	0.0338749	0	-0.0190293	-0.00486563	0.000237519	0.0267043	-0.0168304	0.0011947	-0.0119936	0.344094	4.45258	0.00682277	0.0615865	0.0298178	1.21051
P22415	USF1	Upstream stimulatory factor 1 OS=Homo sapiens OX=9606 GN=USF1 PE=1 SV=1	0.0434782	-0.0434782	0.0696762	-0.0739018	-0.0440839	-0.0217671	0.0144986	-0.00962051	0.0947154	-0.100464	-0.0116382	-0.187694	-0.126224	-0.101258	-0.237999	-0.160381	0	-0.155177	0.141791	-0.107263	-0.0291146	0.12174	0.0722532	-0.314186	0.554213	3.5438	0.00684644	0.061722	-0.192708	1.20956
Q9H2C0	GAN	Gigaxonin OS=Homo sapiens OX=9606 GN=GAN PE=1 SV=1	0.0260743	-0.0260743	-0.00137277	0.0204527	-0.0164204	0.0502338	0.0144546	0.0187865	0.0189897	0.029255	-0.00367163	0.093209	0.0679259	0.122794	0.0452796	0.0493201	0	0.0770046	0.136719	0.129027	0.0557178	0.133193	0.194262	0.151273	0.439113	4.24115	0.00687694	0.0619186	0.0609186	1.20818
O75832	PSMD10	26S proteasome non-ATPase regulatory subunit 10 OS=Homo sapiens OX=9606 GN=PSMD10 PE=1 SV=1	0.0117655	-0.0117655	0.0509819	0.0373566	0.0619432	0.0567929	0.0474832	0.0478311	0.0317284	0.0348333	0.0774962	0.00633898	0.0584722	0.0480251	0.0216024	0.0413603	0	-0.0126665	-0.00447749	0.0142361	-0.0170196	-0.0488322	-0.0229626	-0.0173328	0.568482	6.2461	0.00690161	0.0619655	0.0444921	1.20785
Q5T4S7	UBR4	E3 ubiquitin-protein ligase UBR4 OS=Homo sapiens OX=9606 GN=UBR4 PE=1 SV=1	-0.0189778	0.0189778	0.0150601	0.0145884	-0.00532241	-0.0132372	0.0240248	0.00373124	-0.0237987	-0.00498077	-0.0255081	-0.0252868	-0.0238054	-0.0243006	-0.0293852	-0.0336257	0	0.017291	0.0257106	0.047549	0.0105601	0.0134051	-0.0144189	-0.00538051	0.568444	4.54145	0.00690571	0.0619655	-0.0308706	1.20785
P50570	DNM2	Dynamin-2 OS=Homo sapiens OX=9606 GN=DNM2 PE=1 SV=2	-0.014182	0.014182	0.000972308	-0.0079493	-0.0141853	-0.0280038	0.0148512	-0.0238069	-0.0330427	-0.0590846	-0.00945094	-0.0778967	-0.0493997	-0.0366588	-0.0309385	-0.0259094	0	0.027979	0.00904951	0.0392189	0.00175713	-0.0228103	-0.0135914	-0.00562474	0.491	4.79204	0.00691463	0.0619655	-0.0346071	1.20785
P41226	UBA7	Ubiquitin-like modifier-activating enzyme 7 OS=Homo sapiens OX=9606 GN=UBA7 PE=1 SV=2	0.034922	-0.034922	-0.013484	-0.00109829	0.0103038	-0.0293506	-0.0473478	-0.0367018	-0.00966499	-0.0495681	-0.0452286	-0.0624066	-0.030636	-0.0389596	-0.0374191	-0.0467689	0	0.0528467	0.0333168	0.0438688	0.0466519	-0.0105627	0.0408219	0.00320864	0.439308	5.44924	0.00691695	0.0619655	-0.0380413	1.20785
F5GZ78	PXN	Isoform of P49023, Paxillin OS=Homo sapiens OX=9606 GN=PXN PE=1 SV=1	0.0724668	-0.0724668	-0.0412325	0.158154	-0.0239326	0.0316657	0.0816493	0.037477	-0.0141186	0.105994	0.222275	0.26534	0.0142568	0.277899	0.156183	0.190462	NA	NA	NA	NA	NA	NA	NA	NA	0.494666	4.42899	0.00695963	0.0622695	0.163375	1.20572
Q8N1I0	DOCK4	Dedicator of cytokinesis protein 4 OS=Homo sapiens OX=9606 GN=DOCK4 PE=1 SV=3	0.0247755	-0.0247755	-0.0527527	-0.047325	-0.0985497	-0.0316406	-0.0731509	-0.0921752	-0.0728829	-0.0813716	-0.0672093	-0.0378259	-0.0256429	-0.0479085	-0.0581942	-0.0482138	0	-0.0105311	-0.026729	0.0141214	0.0151586	-0.0256471	-0.00983187	-0.0313434	0.567765	6.07488	0.00697876	0.0623623	-0.0612306	1.20508
Q8NBM8	PCYOX1L	Prenylcysteine oxidase-like OS=Homo sapiens OX=9606 GN=PCYOX1L PE=1 SV=2	-0.0143599	0.0143599	-0.105338	0.00964284	-0.0714309	-0.100083	-0.0999345	-0.0821143	-0.0960023	-0.0927796	-0.0890294	-0.136075	-0.11974	-0.0107434	-0.169214	-0.0281951	NA	NA	NA	NA	NA	NA	NA	NA	0.485424	6.01396	0.00699946	0.0624649	-0.0926306	1.20436
Q8NDT2	RBM15B	Putative RNA-binding protein 15B OS=Homo sapiens OX=9606 GN=RBM15B PE=1 SV=3	-0.00502653	0.00502653	0.0755696	-0.0100581	0.0305857	0.0629634	0.174168	0.0877996	0.0717268	0.149168	-0.0187983	0.172359	0.0486847	0.0814186	0.127652	0.129706	0	0.0735118	0.0820123	0.108415	0.109079	0.0306701	0.0640076	0.0912766	0.455273	5.50096	0.00701217	0.0624649	0.0914731	1.20436
A4D1B5	GSAP	Gamma-secretase-activating protein OS=Homo sapiens OX=9606 GN=GSAP PE=1 SV=2	0.0282298	-0.0282298	0.0455607	0.034277	0.0444681	0.00923463	-0.0992557	0.0139193	0.0222227	0.110738	-0.0478453	-0.197447	-0.0360223	-0.10034	-0.162168	-0.124617	NA	NA	NA	NA	NA	NA	NA	NA	0.567416	4.22503	0.00701656	0.0624649	-0.126889	1.20436
Q2TAL8	QRICH1	Glutamine-rich protein 1 OS=Homo sapiens OX=9606 GN=QRICH1 PE=1 SV=1	0.0395618	-0.0395618	-0.0414526	-0.0449215	-0.00671664	-0.0512622	-0.0866985	-0.0595656	0.00451883	-0.0344582	-0.0367767	-0.0820656	-0.0593318	-0.0638719	-0.0523522	-0.101823	0	-0.0259468	-0.0309722	-0.0293736	-0.00275903	-0.0122363	-3.2576e-05	0.00604245	0.250706	4.05957	0.00703216	0.0625257	-0.0426347	1.20394
P05067	APP	Amyloid-beta precursor protein OS=Homo sapiens OX=9606 GN=APP PE=1 SV=3	-0.00117085	0.00117085	0.0772762	-0.00319746	-0.0242442	0.0374897	0.0208542	0.0221742	0.0651082	0.0116435	0.0738316	0.0275178	0.0459808	0.0212795	0.0615188	0.0691915	0	-0.123271	-0.0901665	-0.155643	-0.0801553	-0.110462	-0.110594	-0.134002	0.372805	4.19282	0.00706157	0.0627088	0.0733037	1.20267
P30837	ALDH1B1	Aldehyde dehydrogenase X, mitochondrial OS=Homo sapiens OX=9606 GN=ALDH1B1 PE=1 SV=3	0.062419	-0.062419	0.0152018	-0.00222319	0.00831216	-0.0781459	0.0396302	-0.0197007	0.00610367	-0.0565992	0.0351049	-0.0100444	0.0457393	0.0102889	0.149297	0.132869	0	-0.00481948	0.0202197	0.0182735	-0.0842944	-0.0123134	-0.0514751	-0.085508	0.566884	3.18308	0.0070745	0.0627454	0.14575	1.20242
Q9GZR2	REXO4	RNA exonuclease 4 OS=Homo sapiens OX=9606 GN=REXO4 PE=1 SV=2	-0.0251424	0.0251424	-0.0806984	-0.0433418	-0.0759372	0.00331619	-0.140639	-0.0654827	-0.0883005	-0.159866	-0.192901	-0.120838	-0.115086	0.0219187	-0.216783	-0.0624258	0	0.01538	0.00133412	-0.0308533	0.0333561	0.00871377	0.00805872	-0.0592391	0.410744	5.66802	0.00713751	0.0632255	-0.119352	1.19911
A0A0J9YW33	STX3	Isoform of Q13277, Syntaxin-3 OS=Homo sapiens OX=9606 GN=STX3 PE=1 SV=1	0.0461315	-0.0461315	0.101523	0.0117577	0.0842067	0.00043028	0.0638035	0.0173655	0.0764963	0.0914087	0.0435112	0.06749	0.041708	0.138766	0.129684	0.0584193	0	-0.0921977	-0.0979376	-0.0517501	-0.0697433	-0.0743729	-0.112866	-0.0569345	0.372747	6.2433	0.00716673	0.0634055	0.140719	1.19787
A0A0A0MS98	SLC4A1	Isoform of P02730, Band 3 anion transport protein OS=Homo sapiens OX=9606 GN=SLC4A1 PE=1 SV=1	0.0442165	-0.0442165	-0.316442	-0.110029	-0.0367787	-0.102302	-0.122642	-0.148996	-0.037452	0.00463041	-0.227421	-0.015628	-0.129614	-0.24001	-0.368027	-0.330936	NA	NA	NA	NA	NA	NA	NA	NA	0.501247	3.27435	0.00717608	0.0634095	-0.275093	1.19785
A0A2R8Y653	UCK2	Isoform of Q9BZX2, Uridine/cytidine kinase OS=Homo sapiens OX=9606 GN=UCK2 PE=1 SV=1	-0.022696	0.022696	-0.0649169	0.0689177	0.00762675	0.101055	0.0496903	0.0187799	0.0815603	5.94139e-05	0.231762	0.0762476	0.162129	0.0152126	0.111354	0.116283	0	-0.0900038	0.0158117	0.119555	-0.00784187	-0.0188472	-0.0318747	-0.0596849	0.427894	4.4612	0.007209	0.063555	0.10072	1.19685
Q5R3K3	CALHM6	Calcium homeostasis modulator protein 6 OS=Homo sapiens OX=9606 GN=CALHM6 PE=1 SV=1	0.0111613	-0.0111613	-0.209747	-0.0989941	0.0437074	0.0631016	-0.11787	-0.0447409	0.00791321	0.127805	-0.164701	-0.21586	-0.271606	-0.0717279	-0.271629	-0.342804	0	0.0837325	0.385127	-0.132413	0.00331044	-0.0367579	0.165032	0.174334	0.565587	4.06229	0.00721749	0.063555	-0.220395	1.19685
P60468	SEC61B	Protein transport protein Sec61 subunit beta OS=Homo sapiens OX=9606 GN=SEC61B PE=1 SV=2	0.0910002	-0.0910002	-0.0918155	-0.0905196	-0.0318915	-0.167417	-0.205714	0.024887	0.0889273	-0.0146951	-0.201388	-0.326657	-0.468133	-0.0825884	-0.241294	-0.321365	NA	NA	NA	NA	NA	NA	NA	NA	0.526356	4.13451	0.00722052	0.063555	-0.237907	1.19685
Q15027	ACAP1	Arf-GAP with coiled-coil, ANK repeat and PH domain-containing protein 1 OS=Homo sapiens OX=9606 GN=ACAP1 PE=1 SV=1	-0.026243	0.026243	-0.00571276	0.00144457	-0.0283845	-0.0224424	0.00209874	-0.0225233	0.000296399	-0.0113195	-0.0479203	0.00615669	-0.0641642	-0.0417991	-0.0410644	-0.0527066	0	0.0247354	-0.000775275	-0.000644607	0.00645133	-0.0225124	-0.0126187	0.0439242	0.480711	3.96231	0.00723188	0.063555	-0.0427246	1.19685
P06576	ATP5F1B	ATP synthase subunit beta, mitochondrial OS=Homo sapiens OX=9606 GN=ATP5F1B PE=1 SV=3	-0.00362938	0.00362938	-0.0217013	-0.0303414	-0.0142089	-0.00521709	0.0309577	0.0196197	-0.011576	-0.0114079	-0.00203553	0.00703868	-0.0137591	0.00339854	0.0414008	0.0529487	0	0.0364308	0.137912	0.0180916	-0.016904	0.0137801	0.0588837	0.0873482	0.56541	3.04219	0.00723717	0.063555	0.0502516	1.19685
O43149	ZZEF1	Zinc finger ZZ-type and EF-hand domain-containing protein 1 OS=Homo sapiens OX=9606 GN=ZZEF1 PE=1 SV=6	0.0124529	-0.0124529	-9.11237e-05	-0.00475479	-0.0277057	-0.0187584	-0.0533492	-0.0460337	-0.0415982	-0.0348922	-0.00147213	-0.0442882	-0.0574046	-0.0644977	0.000322467	-0.0483083	0	-0.00506763	-0.00851589	0.0123989	-0.00536282	-0.016829	-0.0512736	-0.0522323	0.523827	5.54002	0.00726166	0.0636916	-0.038346	1.19592
P15531	NME1	Nucleoside diphosphate kinase A OS=Homo sapiens OX=9606 GN=NME1 PE=1 SV=1	0.003059	-0.003059	-0.118827	-0.15526	-0.37463	-0.243236	0.0310396	-0.272089	-0.469627	-0.314351	-0.404036	-0.13178	-0.423502	-0.12114	-0.415206	-0.126487	0	0.244698	0.242006	0.347298	0.2264	0.196457	0.283468	0.21759	0.460787	6.00074	0.00731154	0.0640501	-0.27209	1.19348
Q9NZN3	EHD3	EH domain-containing protein 3 OS=Homo sapiens OX=9606 GN=EHD3 PE=1 SV=2	-0.00097691	0.00097691	0.00289609	0.0208418	0.0298355	0.00144565	0.0242227	0.0203711	0.0237091	-0.00583877	0.0184097	-0.0213421	0.0317451	0.0487416	0.0602348	0.0369793	0	0.0153064	-0.0261784	-0.032667	-0.027987	-0.011574	-0.0175241	0.0510991	0.564286	3.58988	0.00736331	0.0644245	0.0404357	1.19095
O14492	SH2B2	SH2B adapter protein 2 OS=Homo sapiens OX=9606 GN=SH2B2 PE=1 SV=2	0.0049244	-0.0049244	0.144742	0.10512	0.117416	0.0988335	0.0671619	0.0571717	-0.00346661	0.0466991	0.102232	0.101874	0.0246558	0.113209	0.197878	0.173709	0	-0.0611728	0.0743696	0.0250588	0.0242867	0.0580156	0.0501514	-0.0573413	0.408502	3.11241	0.00737368	0.064436	0.125984	1.19087
Q9NQS5	GPR84	G-protein coupled receptor 84 OS=Homo sapiens OX=9606 GN=GPR84 PE=2 SV=1	0.043854	-0.043854	0.117891	0.12308	0.05257	0.0894958	0.038452	0.0541315	0.0938623	0.0795202	0.0948333	0.0268847	0.0854419	0.191217	0.0893152	0.122698	0	-0.0651377	0.0907689	0.012109	0.0053075	0.0660943	-0.0575478	0.0303418	0.377163	6.3	0.00747119	0.0651443	0.131377	1.18612
P54725	RAD23A	UV excision repair protein RAD23 homolog A OS=Homo sapiens OX=9606 GN=RAD23A PE=1 SV=1	0.0165556	-0.0165556	0.0127705	-0.0235253	-0.0318363	0.00259562	0.00330072	-0.0118173	-0.00288179	-0.0539933	0.0228175	0.0157359	0.00902656	0.020901	0.0638532	0.0541179	0	0.0788585	0.0634903	0.0322298	0.0339436	0.00997771	0.0594202	0.025449	0.563263	3.2491	0.00747974	0.0651443	0.064207	1.18612
O14737	PDCD5	Programmed cell death protein 5 OS=Homo sapiens OX=9606 GN=PDCD5 PE=1 SV=3	0.02188	-0.02188	0.0816523	0.0255307	0.0544078	-0.0223212	0.0602409	0.038724	0.0410348	0.031255	0.0321234	0.043561	0.0402731	0.0235306	0.0934892	0.0951976	0	0.03748	0.0327656	0.0182122	0.00744192	0.0246514	-0.00754643	0.0227401	0.363643	4.27155	0.00748218	0.0651443	0.100539	1.18612
P31942	HNRNPH3	Heterogeneous nuclear ribonucleoprotein H3 OS=Homo sapiens OX=9606 GN=HNRNPH3 PE=1 SV=2	-0.0145066	0.0145066	-0.00288276	0.00855064	-0.0648375	0.00176559	-0.0442698	-0.0251435	-0.0512005	0.0255705	-0.0488109	0.0243989	-0.079508	-0.00349465	-0.120129	-0.110523	0	-0.0717166	-0.0554533	0.0191202	-0.0388599	-0.029029	0.000245699	-0.0163397	0.563055	3.47593	0.00750359	0.065251	-0.102693	1.18541
Q9Y5U2	TSSC4	Protein TSSC4 OS=Homo sapiens OX=9606 GN=TSSC4 PE=1 SV=3	-0.019143	0.019143	0.0719502	0.0392272	0.0402383	0.0632318	0.0304909	0.0370936	0.0187547	0.0484884	0.111574	0.0640583	0.0510706	0.0689116	0.0744221	0.0210004	0	0.0545837	-0.00867991	0.010795	-0.00898609	-0.000938071	-0.0471265	-0.00692325	0.28776	4.43498	0.00755567	0.0654736	0.0369536	1.18393
A0A0G2JIC6	MRPS18B	Isoform of Q9Y676, 28S ribosomal protein S18b, mitochondrial OS=Homo sapiens OX=9606 GN=MRPS18B PE=1 SV=1	-0.0446556	0.0446556	-0.0739311	-0.238037	-0.145809	-0.0582941	-0.0636572	-0.160441	-0.167334	-0.0634619	-0.0634473	-0.069092	-0.186784	-0.0954565	-0.229286	-0.166162	NA	NA	NA	NA	NA	NA	NA	NA	0.444131	6.3	0.00755846	0.0654736	-0.127227	1.18393
O75312	ZPR1	Zinc finger protein ZPR1 OS=Homo sapiens OX=9606 GN=ZPR1 PE=1 SV=1	-0.00620056	0.00620056	0.0554194	0.040754	0.00758044	0.0469174	0.0688461	0.0182168	0.0254831	0.0111694	0.0309506	0.0543313	0.0470682	0.054554	0.0282375	0.0542904	0	0.0516864	0.0494364	0.0557201	0.034198	0.0335379	0.0321884	0.0248108	0.498653	6.3	0.00756684	0.0654736	0.0388431	1.18393
Q9UEU0	VTI1B	Vesicle transport through interaction with t-SNAREs homolog 1B OS=Homo sapiens OX=9606 GN=VTI1B PE=1 SV=3	-0.0115881	0.0115881	0.0227807	3.4202e-05	-0.0380517	-0.00321693	0.0626793	-0.0453326	-0.0158123	-0.00530757	-0.0458781	0.122812	0.0245206	0.0969151	0.194353	0.0979776	0	0.0887284	0.0326562	0.138458	0.057933	0.0706659	0.0609512	0.0427154	0.562505	3.273	0.00756704	0.0654736	0.14477	1.18393
Q9H467	CUEDC2	CUE domain-containing protein 2 OS=Homo sapiens OX=9606 GN=CUEDC2 PE=1 SV=1	0.000557987	-0.000557987	0.0295822	0.109245	0.056663	-0.0146895	0.166478	0.0628283	-0.0483056	0.0764862	0.116457	0.0452723	0.0925735	0.0591156	0.143976	0.154362	NA	NA	NA	NA	NA	NA	NA	NA	0.36551	3.90614	0.00758034	0.0654736	0.148681	1.18393
P55160	NCKAP1L	Nck-associated protein 1-like OS=Homo sapiens OX=9606 GN=NCKAP1L PE=1 SV=3	0.0171326	-0.0171326	-0.0163129	-0.000843918	-0.0317545	-0.0184108	-0.0334295	-0.0379633	-0.0151704	-0.0133268	-0.0384355	-0.122737	-0.0284837	-0.0562043	-0.0141755	-0.0806883	0	0.0126157	-0.00913074	-0.0358756	-0.0191136	-0.0512006	-0.0148791	-0.000465697	0.393704	4.34891	0.00759547	0.0654736	-0.0430585	1.18393
P30040	ERP29	Endoplasmic reticulum resident protein 29 OS=Homo sapiens OX=9606 GN=ERP29 PE=1 SV=4	0.00486223	-0.00486223	0.00613344	-0.00264015	0.0064123	0.011073	0.0294527	-0.000236677	-0.0140221	-0.0128777	0.0100145	0.074331	0.0267622	0.0318694	0.0610492	0.0315273	0	0.0336301	0.0287143	-0.00585319	0.0126028	0.0332849	0.0366113	0.0539809	0.562204	4.22179	0.0076019	0.0654736	0.0374413	1.18393
Q29RF7	PDS5A	Sister chromatid cohesion protein PDS5 homolog A OS=Homo sapiens OX=9606 GN=PDS5A PE=1 SV=1	-0.0134581	0.0134581	-0.0114213	0.0149873	-0.0351082	-0.0234809	-0.0378458	-0.0423528	-0.00519784	-0.0348548	-0.00207155	-0.0605175	-0.0392915	-0.0127469	-0.02596	-0.0779356	0	0.0309218	0.0115016	-0.00813164	0.00657298	-0.010334	-0.0074357	0.0115905	0.366578	5.69091	0.00760274	0.0654736	-0.0672686	1.18393
P55201	BRPF1	Peregrin OS=Homo sapiens OX=9606 GN=BRPF1 PE=1 SV=2	0.0545462	-0.0545462	-0.0626785	-0.0259951	-0.107519	-0.160048	0.0701533	-0.0368329	-0.0565233	-0.0690291	-0.196397	0.0159408	-0.221188	-0.171399	-0.151855	-0.151182	0	-0.0701854	0.016645	-0.0260165	-0.0495363	-0.000998651	-0.0829536	-0.0679239	0.423585	3.97705	0.00763403	0.0656529	-0.136539	1.18275
Q8IV63	VRK3	Inactive serine/threonine-protein kinase VRK3 OS=Homo sapiens OX=9606 GN=VRK3 PE=1 SV=2	0.00342213	-0.00342213	0.0342987	0.0211749	-0.0113574	0.0990762	-0.0049984	0.00603813	0.0319255	0.0284746	-0.00272452	-0.0281819	0.0561258	0.113274	0.082958	0.100157	0	-0.0573734	-0.0638989	-0.106359	-0.0314185	-0.0920167	-0.0800958	-0.00853103	0.561859	3.63742	0.00764199	0.0656529	0.079346	1.18275
Q92804	TAF15	TATA-binding protein-associated factor 2N OS=Homo sapiens OX=9606 GN=TAF15 PE=1 SV=1	0.0339144	-0.0339144	0.00469538	0.0243389	0.0111996	0.0361443	0.0159818	0.0640224	0.0492072	0.0350947	0.0337839	0.0433315	0.0405471	0.0484293	0.0129895	0.0870166	0	0.0381617	0.0101891	0.123901	0.0335237	0.0372923	-0.00652563	0.0678689	0.384449	5.66272	0.00770189	0.0660878	0.0465494	1.17988
P04844	RPN2	Dolichyl-diphosphooligosaccharide--protein glycosyltransferase subunit 2 OS=Homo sapiens OX=9606 GN=RPN2 PE=1 SV=3	0.0394395	-0.0394395	-0.166078	-0.0437926	0.0334191	-0.100421	-0.0802538	-0.0590408	-0.193816	-0.10633	-0.0702121	-0.0966701	-0.218866	-0.0853572	-0.109351	-0.100523	0	0.0469951	0.321899	-0.188524	-0.0741609	-0.0055617	0.118995	0.23639	0.390153	6.3	0.0077174	0.0661412	-0.165791	1.17953
Q8IZE3-2	SCYL3	Isoform of Q8IZE3, Isoform 2 of Protein-associating with the carboxyl-terminal domain of ezrin OS=Homo sapiens OX=9606 GN=SCYL3 PE=1 SV=3	0.0150823	-0.0150823	-0.000838192	0.0805584	0.0365691	0.0257345	-0.0567565	-0.012047	-0.0167922	-0.0198079	0.0880829	0.152742	0.189508	0.0446677	0.134738	0.0289286	0	-0.0383873	-0.00252767	-0.0620817	-0.035639	0.0182586	-0.0865832	-0.0922136	0.560918	4.25117	0.00775243	0.0663616	0.103599	1.17808
Q8TDN6	BRIX1	Ribosome biogenesis protein BRX1 homolog OS=Homo sapiens OX=9606 GN=BRIX1 PE=1 SV=2	0.0398865	-0.0398865	-0.0462812	-0.036815	-0.0680123	-0.00895836	-0.0546173	-0.124588	-0.0022954	-0.0222692	-0.0824552	-0.00567151	-0.0511192	-0.120978	-0.0911504	-0.122128	0	-0.197144	-0.155068	-0.221507	-0.127558	-0.177944	-0.232638	-0.183331	0.321187	3.69503	0.00779565	0.0666399	-0.0758857	1.17627
Q03519	TAP2	Antigen peptide transporter 2 OS=Homo sapiens OX=9606 GN=TAP2 PE=1 SV=1	0.0373833	-0.0373833	-0.142195	-0.0132801	0.063727	0.00930288	0.0103584	-0.0900502	-0.0131891	0.0129292	-0.0819742	-0.172712	-0.177098	-0.0926848	-0.16566	-0.103252	NA	NA	NA	NA	NA	NA	NA	NA	0.550229	4.13609	0.00780366	0.0666399	-0.121192	1.17627
P30405	PPIF	Peptidyl-prolyl cis-trans isomerase F, mitochondrial OS=Homo sapiens OX=9606 GN=PPIF PE=1 SV=1	0.0225558	-0.0225558	-0.0307915	-0.0606728	-0.0342902	-0.0855322	-0.0385388	-0.115694	-0.107752	-0.125305	-0.0577093	-0.158659	-0.0676533	-0.116314	-0.0459909	-0.0442736	0	-0.0662649	-0.063022	-0.0405706	-0.0875667	-0.035038	-0.0614879	-0.162757	0.530155	5.9659	0.00785104	0.0669642	-0.0904723	1.17416
P84022	SMAD3	Mothers against decapentaplegic homolog 3 OS=Homo sapiens OX=9606 GN=SMAD3 PE=1 SV=1	0.00397265	-0.00397265	-0.0489715	-0.0363388	-0.0179577	0.0213716	-0.171491	-0.0958768	-0.00199087	0.0124218	0.0500751	-0.132318	-0.144869	-0.109681	-0.205025	-0.131787	0	0.0309497	0.094078	0.00391091	0.122118	0.0328167	0.0124854	0.050834	0.45621	3.64483	0.0078753	0.0670786	-0.139799	1.17342
A0A087WYN9	DHX29	Isoform of Q7Z478, ATP-dependent RNA helicase DHX29 OS=Homo sapiens OX=9606 GN=DHX29 PE=1 SV=1	0.0359038	-0.0359038	-0.0257511	-0.0120057	-0.0382882	-0.0556823	-0.0762872	-0.0614473	-0.0345249	-0.0634318	-0.0316953	-0.0844753	-0.0661095	-0.034772	-0.0459156	-0.0474967	0	0.0575446	0.0369362	0.0339165	0.0179133	0.0255159	0.0342254	-0.0121314	0.525476	5.8871	0.00788329	0.0670786	-0.0543237	1.17342
Q8WWQ0	PHIP	PH-interacting protein OS=Homo sapiens OX=9606 GN=PHIP PE=1 SV=2	-0.017466	0.017466	-0.00537784	-0.0309049	0.0165193	0.0529873	0.0417994	0.0273521	0.102642	0.0406892	0.0432297	0.0859683	0.013477	0.0840103	0.0219339	0.0565997	0	-0.000939524	-0.0659134	0.0684723	-0.0222671	0.0557984	0.0227642	-0.0432967	0.539829	5.56656	0.00791114	0.0672353	0.0578202	1.1724
P42357	HAL	Histidine ammonia-lyase OS=Homo sapiens OX=9606 GN=HAL PE=1 SV=1	0.0953663	-0.0953663	-0.0641268	-0.210426	-0.0220676	-0.0134808	0.125215	-0.00933326	-0.0856592	-0.0479132	0.0787394	-0.0268893	-0.297604	-0.204556	-0.212913	-0.242634	NA	NA	NA	NA	NA	NA	NA	NA	0.559443	3.7301	0.00792826	0.0673004	-0.221315	1.17198
Q9UPN7	PPP6R1	Serine/threonine-protein phosphatase 6 regulatory subunit 1 OS=Homo sapiens OX=9606 GN=PPP6R1 PE=1 SV=5	-0.031389	0.031389	0.057528	0.0449594	0.0561362	0.0563939	0.0538215	0.0607367	0.0199527	0.064322	0.03643	0.0383075	0.0416066	0.0551164	0.0565653	0.0417961	0	0.0369446	0.0196612	0.0654517	0.0161361	0.00642759	0.026931	0.0144386	0.559107	6.3	0.00796869	0.0675631	0.048847	1.17029
P25205	MCM3	DNA replication licensing factor MCM3 OS=Homo sapiens OX=9606 GN=MCM3 PE=1 SV=3	0.0173056	-0.0173056	0.0193742	0.0314532	-0.000945372	0.0167119	-0.0107156	-0.0116497	0.00381702	-0.00758519	-0.0329621	-0.0179694	-0.00766757	-0.0416342	-0.0187974	-0.0521444	0	0.0473298	0.00580144	0.00525345	-0.00844306	-0.00600752	-0.000903169	0.0163146	0.514177	4.30968	0.0080903	0.0685126	-0.0407121	1.16423
A0A0A0MQW0	MYEF2	Isoform of Q9P2K5, Myelin expression factor 2 OS=Homo sapiens OX=9606 GN=MYEF2 PE=1 SV=1	-0.0105566	0.0105566	-0.00910227	0.173697	-0.239144	0.112303	-0.140489	0.101309	-0.108207	-0.0546487	-0.114912	0.0423147	-0.295413	-0.282837	-0.322918	-0.166212	0	-0.0206999	-0.0202413	-0.0580821	-0.025312	-0.0311855	-0.0538438	0.0296675	0.534974	3.88442	0.00813466	0.0688065	-0.253257	1.16237
P40189	IL6ST	Interleukin-6 receptor subunit beta OS=Homo sapiens OX=9606 GN=IL6ST PE=1 SV=2	-0.0309364	0.0309364	0.0948844	0.0468378	0.0557562	0.00879228	-0.0168521	-0.013367	0.0475462	0.0654381	0.0208936	0.0659215	0.0626401	0.0638579	0.152252	0.0876652	0	-0.032901	0.0401329	0.00833005	0.0417308	0.0205441	0.0930936	0.160731	0.450324	3.24791	0.00816801	0.0690066	0.0932032	1.16111
Q86XK3	SFR1	Swi5-dependent recombination DNA repair protein 1 homolog OS=Homo sapiens OX=9606 GN=SFR1 PE=1 SV=2	-0.125726	0.125726	0.447105	0.70536	0.144646	0.626673	0.158015	0.193911	-0.383853	0.589373	0.684238	1.67202	1.13456	0.654983	0.668034	0.841876	NA	NA	NA	NA	NA	NA	NA	NA	0.515935	4.28108	0.00819059	0.0691154	0.736844	1.16043
O75410	TACC1	Transforming acidic coiled-coil-containing protein 1 OS=Homo sapiens OX=9606 GN=TACC1 PE=1 SV=2	0.00266846	-0.00266846	0.0200286	0.0186645	-0.0184883	0.0056269	0.0156589	-0.0153012	0.0140822	0.0422853	0.0141602	0.0121425	0.0127357	0.0344266	0.0396696	0.0320875	0	0.0121402	0.0326774	0.00393712	0.0169139	0.0200467	-0.0197841	-0.0280262	0.413376	3.43367	0.00822973	0.0693635	0.032182	1.15887
P63241	EIF5A	Eukaryotic translation initiation factor 5A-1 OS=Homo sapiens OX=9606 GN=EIF5A PE=1 SV=2	0.0197579	-0.0197579	-0.0420043	-0.0469733	0.00817053	-0.0352462	-0.0535633	-0.0278504	-0.0438834	-0.075316	-0.0405185	-0.0518039	-0.0447336	-0.0228042	-0.0505412	-0.0365585	0	0.0960383	0.0790859	0.120833	0.0810012	0.0758888	0.0996604	0.0884254	0.45164	6.3	0.00824062	0.0693731	-0.0498625	1.15881
Q9Y3L5	RAP2C	Ras-related protein Rap-2c OS=Homo sapiens OX=9606 GN=RAP2C PE=1 SV=1	0.0195278	-0.0195278	-0.00460342	-0.00419066	-0.0558954	0.0554117	0.0535679	0.0911556	0.0892959	0.0951389	0.0967927	0.0979647	0.0765335	0.066467	0.0260979	0.00500562	0	0.0425132	0.101126	0.078467	0.0502058	0.0762398	0.0698147	0.0211613	0.556627	5.34185	0.00827306	0.0695641	0.0653703	1.15762
Q9NVT9	ARMC1	Armadillo repeat-containing protein 1 OS=Homo sapiens OX=9606 GN=ARMC1 PE=1 SV=1	-0.0435607	0.0435607	0.10491	0.274979	0.134226	0.247238	0.252465	0.145711	0.212152	0.249237	0.307096	0.287167	0.15314	0.227489	0.0577825	0.0878633	0	0.0553016	0.184639	0.171381	0.133609	0.118888	0.082074	0.150531	0.556523	6.3	0.00828606	0.0695912	0.184211	1.15745
Q96SB8	SMC6	Structural maintenance of chromosomes protein 6 OS=Homo sapiens OX=9606 GN=SMC6 PE=1 SV=2	-0.00779454	0.00779454	-0.0183625	0.0010085	-0.0217992	-0.0176369	-0.0497341	-0.0470218	-0.0456125	-0.0209249	-0.0166465	0.0145861	-0.0582848	-0.0763169	-0.00955053	-0.0993192	0	-0.0291884	-0.00828363	0.0100832	-0.0225226	-0.0175202	-0.00535068	0.0107613	0.359591	4.68751	0.0083367	0.069934	-0.075714	1.15531
Q06546	GABPA	GA-binding protein alpha chain OS=Homo sapiens OX=9606 GN=GABPA PE=1 SV=1	0.0139989	-0.0139989	-0.0388951	-0.0147076	0.00391625	0.00111615	-0.0383746	-0.0204546	0.0179947	-0.0270758	-0.042956	-0.028238	-0.0341523	-0.00913089	-0.0657869	-0.047288	0	0.0167026	-0.000398984	0.00510575	0.0172229	0.0223995	0.0103339	0.0455846	0.342077	4.0999	0.00837441	0.070114	-0.0293884	1.1542
Q9UH62	ARMCX3	Armadillo repeat-containing X-linked protein 3 OS=Homo sapiens OX=9606 GN=ARMCX3 PE=1 SV=1	-0.0615389	0.0615389	0.0290274	0.0637904	0.184384	0.029923	0.126783	0.10522	0.129707	-0.00397476	0.0605211	0.0876639	0.122496	0.0884337	0.113195	0.168555	0	-0.0143679	-0.0156152	-0.0509026	-0.0124994	0.0251273	0.0474165	-0.0238392	0.404246	5.99182	0.00837784	0.070114	0.101077	1.1542
Q96AT1	KIAA1143	Uncharacterized protein KIAA1143 OS=Homo sapiens OX=9606 GN=KIAA1143 PE=1 SV=2	0.0120902	-0.0120902	0.0746844	0.0200712	0.0393095	0.0545352	0.0289356	0.0449825	0.0937061	0.0482874	0.0909995	0.0746883	0.0144588	0.0962523	0.0487628	0.0343868	0	-0.0419833	-0.0721448	-0.125048	-0.0412852	-0.0325475	-0.0563912	-0.0114513	0.487617	6.3	0.00840453	0.0702548	0.0641097	1.15332
Q9P2R3	ANKFY1	Rabankyrin-5 OS=Homo sapiens OX=9606 GN=ANKFY1 PE=1 SV=2	-0.00128264	0.00128264	-0.0293401	-0.0123115	-0.0411584	-0.0199247	-0.0240024	-0.0350706	-0.0258905	-0.00941432	-0.0857425	-0.0879973	-0.030494	-0.0357668	-0.00206498	-0.078335	0	0.00470341	-0.00187105	0.0293523	-0.00511763	0.00708224	-0.00272265	-0.00834363	0.384023	4.37684	0.00844053	0.0704488	-0.0372801	1.15213
Q13107	USP4	Ubiquitin carboxyl-terminal hydrolase 4 OS=Homo sapiens OX=9606 GN=USP4 PE=1 SV=3	-0.00657294	0.00657294	-0.00143828	0.00208251	-0.0418769	-0.00432542	-0.0158054	-0.00834757	-0.0180433	-0.01572	-0.0311644	-0.0622532	0.0126766	-0.0467744	-0.0600993	-0.0244464	0	0.0155285	0.026405	0.0229359	0.0116036	0.00605372	-0.0195047	0.0178538	0.346395	4.4918	0.00845671	0.0704488	-0.028373	1.15213
O14530	TXNDC9	Thioredoxin domain-containing protein 9 OS=Homo sapiens OX=9606 GN=TXNDC9 PE=1 SV=2	0.0532815	-0.0532815	0.0656118	0.0133303	-0.100785	-0.0509462	0.0375615	-0.039642	0.00938802	-0.0472024	-0.119394	-0.0444203	-0.104009	-0.0568702	-0.12334	-0.0962917	0	-0.0267979	0.00943784	0.0117912	-0.0340859	-0.0611731	-0.0844822	-0.000710634	0.416555	4.23551	0.00845741	0.0704488	-0.0890883	1.15213
Q96SN8	CDK5RAP2	CDK5 regulatory subunit-associated protein 2 OS=Homo sapiens OX=9606 GN=CDK5RAP2 PE=1 SV=5	0.0165637	-0.0165637	-0.0888849	0.237185	0.0601883	0.146163	0.184604	0.215925	0.0472263	0.144657	0.0326235	0.430522	0.207619	0.170373	0.240283	0.152077	0	-0.154201	-0.137116	-0.111912	0.0203577	0.0632958	-0.0889509	-0.104191	0.376386	5.86446	0.00849754	0.0707003	0.228636	1.15058
Q13451	FKBP5	Peptidyl-prolyl cis-trans isomerase FKBP5 OS=Homo sapiens OX=9606 GN=FKBP5 PE=1 SV=2	-0.00115656	0.00115656	-0.0282333	0.00534899	0.00385085	-0.0257728	-0.0415292	-0.0248714	0.00306659	-0.0250826	-0.0224473	-0.0258109	-0.00468819	-0.0073879	-0.0557872	-0.0570753	0	0.002488	-0.00460243	-0.0389541	0.000488931	-0.00447222	-0.000960571	0.0121231	0.366825	2.96133	0.00853068	0.0708932	-0.0377363	1.1494
P23469	PTPRE	Receptor-type tyrosine-protein phosphatase epsilon OS=Homo sapiens OX=9606 GN=PTPRE PE=1 SV=1	-0.0127574	0.0127574	0.0213549	-0.00531862	0.036034	-0.00929448	0.00129165	-0.0185226	-0.0240402	-0.0322805	-0.0150155	0.00759812	-0.032311	-0.0165668	-0.0370508	-0.0631588	0	0.0612867	0.0484115	0.0803788	0.0730118	0.0094864	0.0380565	0.0195774	0.492239	3.31093	0.0085595	0.0710499	-0.0472004	1.14844
A0A494C0Y7	RAD50	Isoform of Q92878, DNA repair protein RAD50 (Fragment) OS=Homo sapiens OX=9606 GN=RAD50 PE=1 SV=1	-0.0020214	0.0020214	-0.0293179	-0.0506194	0.0723494	-0.120696	0.0452285	-0.110275	-0.120674	-0.108486	-0.0717799	-0.175623	-0.188785	-0.0646203	-0.111201	-0.0575629	0	0.019262	-0.0243331	0.107368	-0.0232577	-0.0365576	-0.00853044	0.0840238	0.43681	4.92116	0.00859709	0.0712049	-0.0963151	1.14749
O95630	STAMBP	STAM-binding protein OS=Homo sapiens OX=9606 GN=STAMBP PE=1 SV=1	-0.00333814	0.00333814	-0.00744093	-0.0114214	0.00425288	0.00277724	0.0474632	0.0636936	0.00397488	-0.0158595	0.0248812	0.000574437	0.0111445	0.0540045	0.0607405	0.0754016	0	0.0648256	0.018244	0.0630365	0.0467501	0.0271722	0.0432955	0.0425471	0.47627	3.39997	0.00859818	0.0712049	0.0606437	1.14749
Q6UB28	METAP1D	Methionine aminopeptidase 1D, mitochondrial OS=Homo sapiens OX=9606 GN=METAP1D PE=1 SV=1	0.0347436	-0.0347436	0.10338	0.0967412	0.00105491	0.0522318	0.030339	0.102122	-0.0459231	0.121776	0.0362627	0.177559	0.148215	0.0713051	0.152467	0.112684	0	-0.07639	-0.0334582	-0.146461	-0.0166042	0.129281	0.0552083	0.0139086	0.319301	4.12168	0.00861809	0.0712869	0.0828183	1.14699
D3DQV9	EIF4G2	Isoform of P78344, Eukaryotic translation initiation factor 4 gamma 2 (Fragment) OS=Homo sapiens OX=9606 GN=EIF4G2 PE=1 SV=1	-0.0124704	0.0124704	-0.00961177	-0.00604887	0.0186299	0.00981522	0.0140502	0.00187661	-0.0125199	-0.0239899	-0.000503378	0.0138273	-0.013208	-0.00717143	-0.0475297	-0.0339343	0	0.0215964	0.0353605	0.0349027	0.0158196	0.00843665	0.00873676	0.0265874	0.553772	3.46988	0.0086354	0.0713472	-0.0411267	1.14662
F8WA39	MTMR1	Isoform of Q13613, Phosphatidylinositol-3,5-bisphosphate 3-phosphatase OS=Homo sapiens OX=9606 GN=MTMR1 PE=1 SV=1	-0.00309504	0.00309504	-0.0185338	0.0127197	-0.00958821	-0.0621582	0.011735	-0.0485287	-0.000587052	-0.00787299	-0.0183205	-0.0658509	-0.0175566	-0.0949241	-0.0401518	-0.0697047	0	0.00515266	-0.0446608	-0.0100168	-0.0255178	-0.0193743	-0.0456096	-0.0322015	0.400429	4.04291	0.00866723	0.0715272	-0.0453513	1.14553
Q9H0U9	TSPYL1	Testis-specific Y-encoded-like protein 1 OS=Homo sapiens OX=9606 GN=TSPYL1 PE=1 SV=3	0.0614311	-0.0614311	0.442785	0.24862	0.320826	0.289867	-0.0767194	0.348876	0.0497361	0.125598	0.419986	0.170165	0.414719	0.390117	0.298957	0.425684	0	-0.0969888	-0.170861	-0.17508	-0.116481	-0.137003	-0.0908958	-0.146407	0.317568	4.02682	0.00868622	0.071601	0.236577	1.14508
Q9UJC3	HOOK1	Protein Hook homolog 1 OS=Homo sapiens OX=9606 GN=HOOK1 PE=1 SV=2	0.0543335	-0.0543335	-0.0378941	0.00668572	0.018066	0.0372249	0.0278074	0.0810011	0.0262711	0.0166489	0.0355227	0.103904	0.0503778	0.0197567	0.0762123	0.126414	0	0.0476153	-0.00728024	-0.0420564	0.0016173	-0.0203721	-0.0428232	0.046949	0.378385	3.46634	0.00876568	0.0721725	0.0947751	1.14163
Q9H0W8	SMG9	Protein SMG9 OS=Homo sapiens OX=9606 GN=SMG9 PE=1 SV=1	-0.018715	0.018715	0.0577111	0.0164091	0.0334532	0.0401076	0.0613401	0.059552	-0.00565991	0.0705002	0.100972	0.0835602	0.032388	0.0163336	0.0557062	0.0741323	0	-0.0244054	0.00506703	-0.0192787	-0.0572245	0.00148144	-0.0304946	-0.0308423	0.214869	4.44235	0.00879209	0.0722993	0.0336616	1.14087
A0A0A0MSV6	C1QB	Isoform of P02746, Complement C1q subcomponent subunit B (Fragment) OS=Homo sapiens OX=9606 GN=C1QB PE=1 SV=6	0.07872	-0.07872	-0.095455	-0.0850441	-0.156235	0.00792056	-0.199486	0.0210615	-0.0355078	-0.0974551	-0.0475316	-0.153073	-0.193132	-0.14702	-0.184836	-0.123753	0	-0.0162269	-0.0983214	-0.0178311	-0.0280046	-0.0712459	0.00713386	0.00680947	0.353591	5.29317	0.00880138	0.0722993	-0.239839	1.14087
Q13206	DDX10	Probable ATP-dependent RNA helicase DDX10 OS=Homo sapiens OX=9606 GN=DDX10 PE=1 SV=2	0.0137819	-0.0137819	0.0281384	-0.00688079	-0.0267647	0.0407656	-0.0577114	0.0287564	-0.0975122	-0.017953	0.0622659	0.0813935	0.0998606	0.0460601	0.0463289	0.0719217	0	-0.0651569	-0.0757876	-0.169506	-0.0834279	-0.0744733	-0.109235	-0.100988	0.552371	4.20375	0.00881809	0.0723347	0.0771602	1.14065
P38159-2	RBMX	Isoform of P38159, Isoform 2 of RNA-binding motif protein, X chromosome OS=Homo sapiens OX=9606 GN=RBMX PE=1 SV=3	-0.0308609	0.0308609	0.0623876	0.0780117	0.0264365	0.0602044	0.0792561	0.0883309	-0.000394246	0.0336588	0.0257112	0.0430808	0.0528807	0.0937942	0.081501	0.117923	0	-0.0566754	-0.0636737	0.0156164	-0.0393332	-0.0278369	-0.0128772	0.0748143	0.308573	3.54095	0.00882602	0.0723347	0.0642357	1.14065
Q9BT40	INPP5K	Inositol polyphosphate 5-phosphatase K OS=Homo sapiens OX=9606 GN=INPP5K PE=1 SV=3	0.00695309	-0.00695309	0.0965365	-0.00481308	0.0040668	0.0182254	-0.0163805	-0.0129929	-0.0493186	-0.0225059	0.0833273	0.0925444	0.031041	0.0639471	0.102119	0.0629402	0	0.0399107	0.0910306	0.229967	0.173416	0.19409	0.227006	0.276197	0.551652	4.23975	0.00891309	0.0729644	0.0716933	1.13689
P10768	ESD	S-formylglutathione hydrolase OS=Homo sapiens OX=9606 GN=ESD PE=1 SV=2	0.0569876	-0.0569876	-0.161012	-0.174914	-0.07214	-0.121975	-0.202729	-0.113883	-0.0952648	-0.122365	-0.107964	-0.164371	-0.175533	-0.137989	-0.0483626	-0.0685483	0	0.0199772	0.0640361	0.00577274	0.0682541	0.044489	-0.0798554	-0.0516955	0.551324	6.3	0.00895668	0.0730584	-0.126196	1.13633
Q9GZQ8	MAP1LC3B	Microtubule-associated proteins 1A/1B light chain 3B OS=Homo sapiens OX=9606 GN=MAP1LC3B PE=1 SV=3	0.0259144	-0.0259144	0.145509	0.0715496	0.0334692	0.0843062	0.133728	-0.0158927	0.0518102	-0.0356572	0.0491777	0.0745749	0.0798068	0.123293	0.193013	0.196833	0	-0.0581245	0.0196419	-0.0945146	0.0623393	0.0223461	-0.0319742	0.0633816	0.508647	3.3361	0.00895883	0.0730584	0.154698	1.13633
Q8TCC3	MRPL30	39S ribosomal protein L30, mitochondrial OS=Homo sapiens OX=9606 GN=MRPL30 PE=1 SV=1	0.0976858	-0.0976858	-0.0396332	-0.115879	-0.0412588	-0.123133	-0.0664875	-0.0268351	-0.0606381	-0.103398	-0.058239	-0.188638	-0.194156	-0.107629	-0.101872	-0.13837	NA	NA	NA	NA	NA	NA	NA	NA	0.357247	6.13334	0.00896181	0.0730584	-0.212204	1.13633
Q6GMV2	SMYD5	SET and MYND domain-containing protein 5 OS=Homo sapiens OX=9606 GN=SMYD5 PE=1 SV=2	-0.0117361	0.0117361	0.0922243	0.0883149	0.130059	0.0939065	0.125592	0.0812279	0.165485	0.0351278	0.122989	-0.000176829	0.0960305	0.0833166	0.136377	0.0874574	0	-0.0533628	-0.06361	-0.0239162	-0.0256108	-0.0543594	-0.138194	-0.224983	0.551176	6.13409	0.00897634	0.0730584	0.0964491	1.13633
O95503	CBX6	Chromobox protein homolog 6 OS=Homo sapiens OX=9606 GN=CBX6 PE=1 SV=1	0.109435	-0.109435	-0.176607	-0.239603	-0.15423	-0.0938247	-0.395664	-0.265694	-0.200309	-0.287878	-0.115014	-0.340663	-0.254138	-0.174589	-0.250615	-0.160901	0	-0.0316962	-0.0502174	-0.0281404	-0.006718	-0.0408448	-0.032646	-0.000638438	0.527133	6.3	0.00897728	0.0730584	-0.243582	1.13633
Q5Y7H0	HLA-DQA1	Isoform of P01909, HLA class II histocompatibility antigen DQ alpha chain OS=Homo sapiens OX=9606 GN=HLA-DQA1 PE=1 SV=1	-0.0582677	0.0582677	0.128439	0.0591502	0.0363128	0.127264	0.234838	0.112161	0.095875	0.0770139	0.146098	0.145156	0.126486	0.143983	0.104056	0.0787843	0	0.216619	0.294766	0.371713	0.195422	0.152168	0.286861	0.197557	0.509689	6.3	0.00898612	0.0730584	0.129865	1.13633
P57075	UBASH3A	Ubiquitin-associated and SH3 domain-containing protein A OS=Homo sapiens OX=9606 GN=UBASH3A PE=1 SV=1	0.0356649	-0.0356649	-0.0323899	0.0113241	-0.0251778	-0.0542534	-0.0849443	-0.019142	0.0013535	-0.0167467	-0.0168156	-0.0494626	-0.0622565	-0.094801	-0.0363947	-0.105408	0	-0.0690511	-0.116075	-0.178324	-0.0855032	-0.085238	-0.108997	-0.112563	0.357034	3.94839	0.00899861	0.0730765	-0.0563889	1.13622
O75884	RBBP9	Serine hydrolase RBBP9 OS=Homo sapiens OX=9606 GN=RBBP9 PE=1 SV=2	0.0049444	-0.0049444	-0.0684709	-0.0322147	-0.0184154	-0.0202388	-0.0463319	0.0125669	-0.001738	-0.0251884	-0.059992	-0.0846237	-0.0797953	-0.0467057	-0.0781088	-0.0165865	0	0.0349247	0.0456888	0.0165088	0.013449	-0.0171521	-0.0113953	-0.0113825	0.450151	4.29091	0.00903129	0.0731895	-0.04438	1.13555
Q8NBJ5	COLGALT1	Procollagen galactosyltransferase 1 OS=Homo sapiens OX=9606 GN=COLGALT1 PE=1 SV=1	0.0174921	-0.0174921	-0.0516193	-0.0324974	-0.0281692	-0.0912379	-0.0316183	-0.00461719	-0.0759956	-0.111511	-0.0394734	-0.0683813	-0.042773	-0.0291198	-0.0648434	-0.0757193	0	-0.0260777	0.00326246	-0.00182547	-0.0256343	-0.00952963	-0.0148021	-0.0482678	0.434173	6.3	0.00904184	0.0731895	-0.0573269	1.13555
Q14684	RRP1B	Ribosomal RNA processing protein 1 homolog B OS=Homo sapiens OX=9606 GN=RRP1B PE=1 SV=3	-0.0105378	0.0105378	-0.0655765	-0.012428	-0.0504579	0.00185485	-0.0400473	0.00139017	-0.0170218	0.0188895	-0.0867853	-0.061138	-0.0701043	-0.0236628	-0.0483025	-0.0867419	0	-0.0052152	-0.0473018	-0.0363651	0.0574161	-0.0245598	-0.0108204	-0.0154572	0.479983	4.25488	0.00904335	0.0731895	-0.0492275	1.13555
R4GMU7	RPL7L1	Isoform of Q6DKI1, 60S ribosomal protein L7-like 1 (Fragment) OS=Homo sapiens OX=9606 GN=RPL7L1 PE=1 SV=2	0.0651854	-0.0651854	-0.287655	-0.10477	0.0847279	-0.0973003	-0.456367	-0.0822838	-0.246461	-0.188984	-0.22379	-0.0828758	-0.186745	-0.358248	-0.302665	-0.18745	0	0.0327903	-0.0394538	0.070426	-0.0227283	-0.0487628	-0.045341	0.0172413	0.368688	6.3	0.00907829	0.0733888	-0.341924	1.13437
Q5T3I0	GPATCH4	G patch domain-containing protein 4 OS=Homo sapiens OX=9606 GN=GPATCH4 PE=1 SV=2	0.00683738	-0.00683738	0.100264	0.0267106	0.0344007	0.105846	0.226477	0.238684	0.0592184	0.194058	0.0815079	0.17612	0.170491	0.134202	0.057184	0.127382	0	0.0101961	0.0067685	-0.00545145	-0.0112894	0.0250874	0.0943499	-0.0200823	0.460241	5.8	0.0091165	0.0736142	0.172796	1.13304
P52789	HK2	Hexokinase-2 OS=Homo sapiens OX=9606 GN=HK2 PE=1 SV=2	-0.0126205	0.0126205	0.00918764	-0.0512059	-0.036959	-0.0406333	-0.108139	-0.0527333	-0.0276945	-0.0164532	-0.0482445	-0.0401029	-0.0340921	-0.0144402	-0.0661679	-0.11213	0	-0.0149594	0.0222103	0.0449357	0.0284332	-0.00910428	0.037517	0.0413868	0.374852	5.87123	0.00915818	0.073867	-0.0534723	1.13155
Q9Y4C1	KDM3A	Lysine-specific demethylase 3A OS=Homo sapiens OX=9606 GN=KDM3A PE=1 SV=4	0.0724769	-0.0724769	0.0123558	0.103071	0.0511161	0.0644343	0.0223559	0.0896953	0.0686485	0.0886933	0.0454804	0.127387	0.0773887	0.104862	0.0670112	0.119694	0	0.0149864	-0.0278006	-0.0214745	0.0150613	0.000236253	-0.00602499	0.0114572	0.369536	6.3	0.00921754	0.0741764	0.125816	1.12973
X6RLT1	NELFCD	Isoform of Q8IXH7, Negative elongation factor C/D (Fragment) OS=Homo sapiens OX=9606 GN=NELFCD PE=1 SV=1	-0.0358189	0.0358189	-0.0159864	-0.0671204	-0.120415	0.0367359	0.159181	-0.0304826	-0.00387487	-0.0140713	-0.151039	-0.200576	-0.0935436	-0.0565711	-0.211708	-0.26336	0	0.0394419	-0.0278863	-0.0451574	6.26827e-05	-0.0265062	-0.0774379	-0.0771088	0.54937	4.35666	0.00922023	0.0741764	-0.159083	1.12973
Q9UEG4	ZNF629	Zinc finger protein 629 OS=Homo sapiens OX=9606 GN=ZNF629 PE=1 SV=2	0.0207939	-0.0207939	0.0437251	0.0535278	-0.037093	0.0731487	0.00940284	0.0630331	0.0972674	0.0387162	-0.0332995	0.0631281	0.0760507	0.145136	0.0803476	0.100062	NA	NA	NA	NA	NA	NA	NA	NA	0.356798	3.92263	0.00922779	0.0741764	0.0971027	1.12973
Q8NAA4	ATG16L2	Protein Atg16l2 OS=Homo sapiens OX=9606 GN=ATG16L2 PE=1 SV=2	0.0787801	-0.0787801	0.0102895	-0.127982	-0.0765639	-0.186235	-0.116131	-0.0429497	-0.0670712	-0.136023	-0.106504	-0.168038	-0.15954	-0.16571	-0.0664151	-0.122264	0	-0.174276	-0.142495	-0.0351643	-0.0975705	-0.089575	0.0200578	-0.122313	0.413367	6.3	0.00924129	0.0742012	-0.144183	1.12959
P68104	EEF1A1	Elongation factor 1-alpha 1 OS=Homo sapiens OX=9606 GN=EEF1A1 PE=1 SV=1	0.0160271	-0.0160271	-0.00600987	-0.000372983	-0.0227117	-0.0355891	-0.0472944	-0.0504413	-0.0251319	-0.0759951	-0.0261411	-0.0779659	-0.0172895	-0.0358059	-0.0269332	-0.035589	0	-0.0433301	-0.0292704	-0.0305845	0.000854052	-0.0252463	-0.0335939	-0.0541543	0.54913	5.62375	0.00925299	0.0742114	-0.0413673	1.12953
Q5T2E6	ARMH3	Armadillo-like helical domain-containing protein 3 OS=Homo sapiens OX=9606 GN=ARMH3 PE=1 SV=1	0.0129367	-0.0129367	0.111098	0.068696	0.0689527	0.122469	0.0745495	0.00671795	0.0203976	0.027191	0.090431	0.0238098	0.0542289	0.111298	0.135029	0.122236	0	0.00666873	0.0407396	0.0538027	0.0362019	0.0403304	0.0205611	0.0206773	0.341319	3.43642	0.00927216	0.0742815	0.0862111	1.12912
O00571	DDX3X	ATP-dependent RNA helicase DDX3X OS=Homo sapiens OX=9606 GN=DDX3X PE=1 SV=3	-0.00650613	0.00650613	-0.0278912	-0.0297318	-0.0372423	-0.0215105	-0.0783559	-0.0514602	-0.033557	-0.0082559	-0.049105	-0.0427895	-0.00172063	-0.0433052	-0.0346177	-0.0792127	0	0.0191458	0.0164426	0.0813863	0.0100082	0.00368137	0.0258816	0.00872548	0.1135	4.26853	0.00929382	0.0743662	-0.0178175	1.12862
E9PH05	FAM162A	Isoform of Q96A26, Protein FAM162A OS=Homo sapiens OX=9606 GN=FAM162A PE=1 SV=1	0.00315247	-0.00315247	-0.185851	-0.126406	-0.0068925	-0.0850609	-0.114633	-0.121085	-0.0582898	-8.02787e-05	-0.092462	-0.203897	-0.146069	-0.0965405	-0.206668	-0.0837414	NA	NA	NA	NA	NA	NA	NA	NA	0.284408	4.23551	0.0093036	0.0743662	-0.0802259	1.12862
A0A087WW23	ALOX5AP	Isoform of P20292, Arachidonate 5-lipoxygenase-activating protein OS=Homo sapiens OX=9606 GN=ALOX5AP PE=1 SV=1	-0.0953733	0.0953733	-0.522832	-0.192583	0.00325224	-0.0960115	-0.163633	-0.224064	-0.153747	-0.0635521	-0.526646	-0.186099	-0.436867	-0.290833	-0.281979	-0.309966	NA	NA	NA	NA	NA	NA	NA	NA	0.345956	4.27561	0.00932703	0.0744699	-0.221451	1.12802
Q96ME7	ZNF512	Zinc finger protein 512 OS=Homo sapiens OX=9606 GN=ZNF512 PE=1 SV=2	-0.030065	0.030065	0.00666441	0.00885229	-0.00196839	-0.00742247	0.0364198	0.00519791	0.00968172	0.00237118	-0.00920123	-0.0398442	-0.0590856	-0.0286573	-0.0555917	-0.0300438	0	-0.0307579	-0.00720669	-0.0467114	0.0174721	-0.0142623	-0.0220064	-0.041545	0.54849	4.02248	0.00934095	0.0744975	-0.0483291	1.12786
B0QY21	NUP50	Isoform of Q9UKX7, Nuclear pore complex protein Nup50 (Fragment) OS=Homo sapiens OX=9606 GN=NUP50 PE=1 SV=1	-0.0210559	0.0210559	0.1326	0.0653805	0.0905076	0.093114	-0.109445	-0.0562903	0.161788	0.0567302	0.0999724	0.181392	0.105643	0.193589	0.114807	0.194964	0	0.0452937	0.106276	0.0368179	0.186246	0.183501	0.144412	0.119901	0.484826	4.56304	0.00935738	0.074545	0.126817	1.12758
Q96IK1	BOD1	Biorientation of chromosomes in cell division protein 1 OS=Homo sapiens OX=9606 GN=BOD1 PE=1 SV=2	-0.102884	0.102884	0.0156397	0.024826	0.018099	0.0724461	0.164098	0.0301465	0.12597	0.11339	0.0544737	0.178454	0.113789	0.101116	0.0896397	0.135072	0	-0.0454631	-0.07333	-0.0550497	0.0221947	-0.0101552	-0.0871331	-0.051548	0.406144	5.43553	0.00939673	0.0747749	0.112935	1.12624
Q12888	TP53BP1	TP53-binding protein 1 OS=Homo sapiens OX=9606 GN=TP53BP1 PE=1 SV=2	-0.00366128	0.00366128	0.0368786	0.0449276	0.0212281	0.0507573	0.0334608	0.0239722	0.0192846	-0.00177589	0.028248	0.0231715	0.0315949	0.0590943	0.035833	0.0427696	0	0.0105689	-0.00657148	-0.00912144	0.00105267	0.0207677	0.0019655	0.0406923	0.260145	3.95423	0.0094386	0.0750243	0.0232635	1.1248
Q15418-4	RPS6KA1	Isoform of Q15418, Isoform 4 of Ribosomal protein S6 kinase alpha-1 OS=Homo sapiens OX=9606 GN=RPS6KA1 PE=1 SV=2	-0.0194798	0.0194798	-0.000142422	-0.00712653	-0.000215948	-0.0271803	-0.0360881	-0.0246526	-0.00428217	-0.0118185	-0.0197921	-0.034389	-0.0232541	-0.0317872	-0.0296343	-0.0178876	0	0.00521546	-0.0381624	0.00145424	0.00742514	-0.0319976	-0.026685	2.53049e-05	0.240863	4.25556	0.00946807	0.0751638	-0.0168727	1.12399
O15164	TRIM24	Transcription intermediary factor 1-alpha OS=Homo sapiens OX=9606 GN=TRIM24 PE=1 SV=3	0.0266784	-0.0266784	0.115503	0.0328266	0.0687183	0.0969061	0.118616	0.0600326	0.0434777	0.0824293	0.0820656	0.0601222	0.157323	0.0558511	0.0685264	0.0698342	0	0.0210693	0.0214839	0.00353417	0.00391937	0.0783494	0.0422822	0.0167293	0.535301	6.12441	0.00947726	0.0751638	0.0803252	1.12399
Q92621	NUP205	Nuclear pore complex protein Nup205 OS=Homo sapiens OX=9606 GN=NUP205 PE=1 SV=3	0.00382376	-0.00382376	-0.0600446	0.00752903	0.00616939	-0.0349356	-0.0269238	-0.0321934	-0.0441247	0.020179	-0.0428094	-0.0678609	-0.0521096	-0.0457298	-0.0465438	-0.0270766	0	-0.0220659	-0.0287114	-0.00693457	-0.0294692	-0.0195694	-0.0295798	0.0435493	0.364761	4.29731	0.00950618	0.07519	-0.0333938	1.12384
B5MBZ0	EML4	Isoform of Q9HC35, Echinoderm microtubule-associated protein-like 4 OS=Homo sapiens OX=9606 GN=EML4 PE=1 SV=3	0.0213997	-0.0213997	0.073834	-0.00137395	0.03259	0.0342864	-0.00700493	-0.0423273	-0.0902367	0.000285467	-0.122653	-0.00453021	-0.165996	-0.0353116	-0.149325	-0.0234243	NA	NA	NA	NA	NA	NA	NA	NA	0.48624	4.62903	0.00950988	0.07519	-0.106066	1.12384
Q8NHQ9	DDX55	ATP-dependent RNA helicase DDX55 OS=Homo sapiens OX=9606 GN=DDX55 PE=1 SV=3	0.0110058	-0.0110058	-0.0275722	-0.0676253	-0.0673416	-0.0265267	-0.111815	-0.0493288	-0.0654521	0.0180896	-0.0463506	-0.0426236	-0.103228	-0.0239282	-0.159328	-0.0576877	0	0.00275413	-0.076411	-0.10065	-0.0557058	-0.0155334	-0.0187811	-0.0283616	0.28914	3.16203	0.00952131	0.07519	-0.0734607	1.12384
A0A6Q8PHK0	TRIP12	Isoform of Q14669, E3 ubiquitin-protein ligase TRIP12 OS=Homo sapiens OX=9606 GN=TRIP12 PE=1 SV=1	-0.0401464	0.0401464	-0.0183668	0.025748	0.00626713	-0.00523165	-0.0357409	0.0368641	-0.0255541	-0.0106005	-0.0331793	-0.03722	-0.0224108	-0.0409688	-0.0820222	-0.0798825	0	-0.0209521	-0.0323027	-0.0248799	-0.0156481	-0.0272569	-0.0246586	-0.0435585	0.505276	3.30664	0.0095322	0.07519	-0.0750187	1.12384
P46060	RANGAP1	Ran GTPase-activating protein 1 OS=Homo sapiens OX=9606 GN=RANGAP1 PE=1 SV=1	-0.00959587	0.00959587	0.01654	0.0232682	0.00981114	0.0270878	-0.0210713	-0.0204836	-0.00915564	0.00888547	-0.02121	0.0137577	-0.0243851	-0.0162278	-0.0374462	-0.0505091	0	0.0435189	0.022232	0.0697901	0.017866	0.00477236	0.0180827	0.0213999	0.547108	3.29808	0.00953336	0.07519	-0.0464588	1.12384
K7EM38	ACTG1	Isoform of P63261, Actin, cytoplasmic 2 (Fragment) OS=Homo sapiens OX=9606 GN=ACTG1 PE=1 SV=1	-0.010686	0.010686	0.0522238	0.0479927	0.0151399	0.0260996	-0.00459967	-0.0103774	0.0226103	-0.00331083	0.0372692	0.0585133	0.0285182	0.055465	0.0503662	0.0667217	0	-0.0337703	-0.0245739	-0.0846867	-0.0649335	0.00522794	-0.036638	-0.0263322	0.470739	4.13494	0.00955003	0.0752382	0.0381303	1.12356
Q8N8N7	PTGR2	Prostaglandin reductase 2 OS=Homo sapiens OX=9606 GN=PTGR2 PE=1 SV=1	-0.00566354	0.00566354	0.0751328	0.0636966	-0.00414561	-0.00980235	0.0872784	0.101212	0.0401452	-0.0158044	0.0370882	0.177601	0.0363667	0.0944449	0.13061	0.0857933	0	0.211996	0.172041	0.18721	0.133757	0.167746	0.267669	0.213607	0.327506	4.25764	0.00956503	0.0752731	0.0656074	1.12336
A0A2R8Y4Z8	CCDC9	Isoform of Q9Y3X0, Coiled-coil domain-containing protein 9 OS=Homo sapiens OX=9606 GN=CCDC9 PE=1 SV=1	0.0356662	-0.0356662	0.0300711	-0.021932	0.0116617	0.0159159	0.0301086	0.0191128	0.0332658	-0.000563219	0.0752415	0.00774078	0.0282808	0.0257305	0.0676221	0.0706046	0	0.0530685	0.0563347	0.096465	0.0310568	0.0763952	0.0661066	0.0653736	0.386226	3.31375	0.00957858	0.0752965	0.0585426	1.12323
H0YF29	C8orf82	Isoform of Q6P1X6, UPF0598 protein C8orf82 (Fragment) OS=Homo sapiens OX=9606 GN=C8orf82 PE=1 SV=1	-0.00425649	0.00425649	0.000889951	0.0201833	0.0423419	0.0021787	-0.0442083	0.0821393	-0.0991334	-0.0660652	-0.0546623	-0.0836059	-0.0913051	-0.0925536	0.0240901	-0.0587362	0	0.0331479	-0.206672	-0.0622958	-0.065497	0.043998	0.0576256	-0.165544	0.546589	4.77772	0.00960642	0.0754321	-0.0757925	1.12244
O43524	FOXO3	Forkhead box protein O3 OS=Homo sapiens OX=9606 GN=FOXO3 PE=1 SV=1	0.0258247	-0.0258247	-0.0386878	-0.0102439	-0.0587167	-0.0107448	0.0300679	-0.00193594	-0.0457053	-0.0250177	0.0304702	0.000235456	-0.012092	0.00897871	0.0788682	0.0788936	0	-0.00558895	-0.00430688	0.0099841	-0.0519221	-0.0230263	-0.0300128	-0.0636605	0.546419	3.13541	0.0096305	0.0754745	0.088153	1.1222
P46063	RECQL	ATP-dependent DNA helicase Q1 OS=Homo sapiens OX=9606 GN=RECQL PE=1 SV=3	0.00246064	-0.00246064	-0.0113942	-0.00563254	-0.00799368	-0.00769628	-0.0172544	-0.0181787	0.00966877	-0.0136065	-0.00929081	-0.0524263	-0.0149435	-0.0128287	-0.0194701	-0.0745364	0	0.0364863	-0.0033597	-0.02182	0.00195425	0.00581129	-0.00556041	0.0131676	0.358006	4.20956	0.00964226	0.0754745	-0.0246981	1.1222
P50548	ERF	ETS domain-containing transcription factor ERF OS=Homo sapiens OX=9606 GN=ERF PE=1 SV=2	-0.0827209	0.0827209	0.0228773	0.0338717	0.0792339	0.100377	-0.0217983	-0.0435353	0.0276417	0.0659386	0.119433	0.145763	0.076637	0.159879	0.093143	0.148603	0	-0.0185988	0.0078487	-0.034052	0.0361274	0.0393009	0.115042	0.00675572	0.456505	4.47514	0.00964361	0.0754745	0.106809	1.1222
A0A140T8X0	HLA-F	Isoform of P30511, HLA class I histocompatibility antigen, alpha chain F (Fragment) OS=Homo sapiens OX=9606 GN=HLA-F PE=1 SV=1	0.0303408	-0.0303408	-0.0608027	-0.01431	-0.0812595	0.0306801	-0.111622	-0.0380539	-0.0220523	-0.0382766	-0.121956	-0.0342893	-0.0194615	-0.0369464	-0.143279	-0.114923	0	-0.106661	0.0692907	-0.147009	-0.0340951	-0.0900311	0.0378953	-0.131754	0.220261	4.29249	0.00967433	0.0755498	-0.0515385	1.12177
Q03518	TAP1	Antigen peptide transporter 1 OS=Homo sapiens OX=9606 GN=TAP1 PE=1 SV=2	0.111026	-0.111026	-0.129738	-0.0911767	-0.173503	-0.127471	-0.0914493	-0.0788392	-0.0920275	-0.0808434	-0.0738574	-0.188152	-0.233416	-0.15933	-0.20794	-0.0834237	0	0.211551	0.259728	0.264709	0.180237	0.194404	0.229495	0.335402	0.380403	6.08054	0.0096817	0.0755498	-0.132521	1.12177
Q9UER7	DAXX	Death domain-associated protein 6 OS=Homo sapiens OX=9606 GN=DAXX PE=1 SV=2	-0.0279467	0.0279467	0.0122276	0.00825165	0.0506882	-0.0267557	-0.0346312	-0.0338581	0.00896021	0.0112283	-0.0115409	-0.00241574	-0.031623	0.0417913	-0.0724653	-0.11617	0	0.00693699	-0.00294973	0.0301986	0.00497931	0.0234805	0.0247456	0.0210137	0.546008	3.04132	0.00968881	0.0755498	-0.0938372	1.12177
O75563	SKAP2	Src kinase-associated phosphoprotein 2 OS=Homo sapiens OX=9606 GN=SKAP2 PE=1 SV=1	-0.0143881	0.0143881	-0.00816538	0.0209406	-0.0373147	0.0118518	-0.0185378	-0.0026487	0.00871101	-0.0194864	0.0534377	0.0431472	0.028097	0.03836	0.0135886	0.0233121	0	0.0442639	0.0401673	0.0750098	0.0558701	0.0279576	0.041472	0.0387168	0.545955	4.31104	0.00969638	0.0755498	0.0371273	1.12177
A6NFQ2	TCAF2	TRPM8 channel-associated factor 2 OS=Homo sapiens OX=9606 GN=TCAF2 PE=1 SV=2	-0.000199626	0.000199626	-0.0327861	-0.113384	-0.119988	-0.0716227	-0.0906646	-0.0471334	-0.0502584	-0.0918329	-0.0896824	-0.0137998	-0.084969	-0.057317	-0.0600269	-0.141537	0	-0.0895049	-0.094094	-0.0760589	-0.10103	-0.164252	-0.148332	-0.0880037	0.526718	6.15219	0.00970627	0.0755498	-0.0765691	1.12177
Q5VWJ9	SNX30	Sorting nexin-30 OS=Homo sapiens OX=9606 GN=SNX30 PE=1 SV=1	0.0265745	-0.0265745	-0.00101394	-0.0402847	-0.0154317	-0.0292389	-0.0247764	-0.0419049	-0.062631	-0.0599979	-0.0322338	-0.0578422	-0.01845	-0.0517599	-0.0171129	-0.0549818	0	0.00419279	-0.0406892	-0.024424	-0.0166453	-0.0664336	-0.0125495	0.00208557	0.439606	5.79125	0.00974093	0.0755909	-0.0435686	1.12153
A0A140TA86	MICOS13	Isoform of Q5XKP0, MICOS complex subunit MIC13 OS=Homo sapiens OX=9606 GN=MICOS13 PE=1 SV=1	-0.136694	0.136694	-0.155221	-0.0402091	-0.0808241	-0.0821197	0.0693594	-0.0977336	-0.208989	-0.0801185	-0.208057	-0.162296	-0.162977	-0.0839326	-0.231891	-0.196016	NA	NA	NA	NA	NA	NA	NA	NA	0.355189	4.58645	0.00974318	0.0755909	-0.135532	1.12153
E9PQB7	CFL1	Isoform of P23528, Cofilin, non-muscle isoform (Fragment) OS=Homo sapiens OX=9606 GN=CFL1 PE=1 SV=1	-0.0561102	0.0561102	0.142518	0.0159576	0.09812	0.116264	0.0328018	0.0389029	0.00029294	-0.0477744	-0.110903	-0.0918383	-0.0463406	0.0293286	-0.172096	-0.228658	0	-0.0263568	-0.0258666	-0.012389	0.030882	-0.0354271	-0.00161275	-0.0578735	0.545625	3.26913	0.00974339	0.0755909	-0.208608	1.12153
Q05682	CALD1	Caldesmon OS=Homo sapiens OX=9606 GN=CALD1 PE=1 SV=3	-0.394816	0.394816	0.199468	0.401962	0.4162	0.750966	0.479417	0.308273	0.378519	0.288338	0.385324	0.717531	0.354944	0.65396	0.489997	0.574725	NA	NA	NA	NA	NA	NA	NA	NA	0.435053	6.02499	0.00975856	0.0756262	0.483185	1.12133
Q9C035	TRIM5	Tripartite motif-containing protein 5 OS=Homo sapiens OX=9606 GN=TRIM5 PE=1 SV=1	0.0434218	-0.0434218	-0.00921555	-0.0262391	-0.0357923	-0.0596004	-0.0644856	-0.0431331	-0.109064	-0.0739485	-0.0140018	-0.0733023	-0.0486016	-0.0606344	-0.0634538	-0.0523924	0	0.00885966	-0.0373734	-0.0308165	-0.014275	-0.0302997	-0.0859103	-0.078363	0.465642	5.80489	0.00978983	0.075773	-0.0607007	1.12049
O60333-3	KIF1B	Isoform of O60333, Isoform 3 of Kinesin-like protein KIF1B OS=Homo sapiens OX=9606 GN=KIF1B PE=1 SV=5	0.0153344	-0.0153344	-0.0642261	-0.11448	-0.116378	-0.124956	-0.143537	-0.0292265	-0.127837	-0.0277945	-0.0923045	-0.08194	-0.12685	-0.04742	-0.127139	-0.0560791	0	0.0908598	-0.00834417	0.150393	0.00214167	0.0705178	0.0410643	0.0141221	0.545128	6.18018	0.00981474	0.075773	-0.0917883	1.12049
E7EUI6	ITGB1	Isoform of P05556, Fibronectin receptor subunit beta OS=Homo sapiens OX=9606 GN=ITGB1 PE=1 SV=2	-0.0162516	0.0162516	-0.0730597	-0.0708884	0.0525341	0.030022	0.0125453	0.0260783	-0.0471538	-0.00115011	-0.0213377	-0.113095	-0.0931142	-0.0504544	-0.0803549	-0.258259	0	-0.0510258	0.0430046	-0.0224536	-0.039566	-0.0942465	0.0260642	-0.0445392	0.54505	3.29049	0.00982601	0.075773	-0.15708	1.12049
Q9BW30	TPPP3	Tubulin polymerization-promoting protein family member 3 OS=Homo sapiens OX=9606 GN=TPPP3 PE=1 SV=1	-0.00782493	0.00782493	0.0465343	-0.0300157	-0.00980328	0.0061376	0.0197957	0.0397318	0.0580132	-0.016995	0.0101205	0.0439635	0.0372897	0.0292448	0.0434659	0.13848	0	0.0571628	0.0156813	0.0594666	0.0338647	0.0331999	0.0900377	0.0764494	0.463515	3.20194	0.00983985	0.075773	0.0768889	1.12049
Q0ZGT2	NEXN	Nexilin OS=Homo sapiens OX=9606 GN=NEXN PE=1 SV=1	0.00247942	-0.00247942	0.0137703	0.00994623	0.0288773	0.0179473	5.17425e-05	0.03057	0.0857218	0.0242047	0.0526833	0.0523776	0.0504592	0.0267811	0.00675151	0.0346735	0	0.0140441	-0.0254132	-0.0218796	-0.00901452	0.0155342	-0.03939	-0.018869	0.456421	4.93015	0.00984109	0.075773	0.0328933	1.12049
Q08117	TLE5	TLE family member 5 OS=Homo sapiens OX=9606 GN=TLE5 PE=1 SV=4	0.0573479	-0.0573479	0.000862398	-0.0670698	-0.0104958	-0.00140944	-0.107908	-0.129692	-0.0795106	0.0494682	-0.104698	0.0141508	-0.082968	-0.12928	-0.12036	-0.189932	0	-0.0668538	-0.0651002	-0.184633	-0.0837069	-0.117387	-0.0886571	-0.113304	0.38073	3.28977	0.00984134	0.075773	-0.126963	1.12049
P14866	HNRNPL	Heterogeneous nuclear ribonucleoprotein L OS=Homo sapiens OX=9606 GN=HNRNPL PE=1 SV=2	0.0108945	-0.0108945	-0.017403	-0.00221532	-0.00583962	0.00558022	-0.0418558	-0.0198299	-0.00045315	-0.0212087	-0.0211167	-0.0685709	0.00660413	-0.0265753	-0.0368147	-0.0652128	0	-0.0394692	-0.0558848	-0.0321417	-0.0416971	-0.0394249	-0.0582869	-0.0358146	0.302855	4.41294	0.00987299	0.0758253	-0.0271302	1.12019
Q9Y5M8	SRPRB	Signal recognition particle receptor subunit beta OS=Homo sapiens OX=9606 GN=SRPRB PE=1 SV=3	0.0203487	-0.0203487	-0.0114772	0.0132316	0.0209302	0.0564157	0.0972566	-0.0230897	-0.0222886	0.0608346	0.0471091	0.0392196	0.0961291	0.10831	0.0893993	0.0230997	0	0.042244	0.119038	0.0359312	0.00149157	0.10282	0.139678	0.160097	0.366686	3.98588	0.00987588	0.0758253	0.0632508	1.12019
Q9NQT4	EXOSC5	Exosome complex component RRP46 OS=Homo sapiens OX=9606 GN=EXOSC5 PE=1 SV=1	0.0379498	-0.0379498	0.0662209	0.0248911	0.0373506	0.0617797	0.0265859	0.0672269	0.0582242	0.0319901	0.0560578	0.0893771	0.0542146	0.0735638	0.0216	0.0731912	0	0.00138145	0.00847093	-0.0298569	0.0310537	0.00898164	0.0075093	0.0270428	0.438024	6.3	0.00988008	0.0758253	0.0554945	1.12019
Q1RLN5	ARHGAP12	Isoform of Q8IWW6, ARHGAP12 protein OS=Homo sapiens OX=9606 GN=ARHGAP12 PE=1 SV=1	0.185948	-0.185948	-0.0902296	-0.131583	-0.146751	-0.297253	-0.170738	-0.103427	-0.0800491	-0.226982	-0.113145	-0.353735	-0.322016	-0.272309	-0.196778	-0.202922	0	-0.022804	-0.0246012	-0.0520414	-0.07927	-0.0952438	-0.0691545	-0.0614251	0.372269	6.3	0.00992733	0.076106	-0.30573	1.11858
P17028	ZNF24	Zinc finger protein 24 OS=Homo sapiens OX=9606 GN=ZNF24 PE=1 SV=4	0.00735448	-0.00735448	-0.0311485	-0.116154	-0.00544484	-0.0376225	-0.0776708	-0.0660578	-0.0192657	-0.0590241	-0.0711303	-0.144804	-0.0443508	-0.0181592	-0.162242	-0.0660063	0	-0.0131293	0.017868	0.0954643	0.00194786	-0.0254067	0.00853136	0.0282136	0.23762	4.42016	0.00993843	0.0761091	-0.051048	1.11856
Q13263	TRIM28	Transcription intermediary factor 1-beta OS=Homo sapiens OX=9606 GN=TRIM28 PE=1 SV=5	-0.00329472	0.00329472	-0.000470933	0.00917996	0.00475354	0.0136348	0.0318227	0.00415895	-0.00738821	-0.00212118	-0.034837	-0.0579668	-0.00302551	-0.00866702	-0.0145463	-0.0602528	0	0.0100127	-0.0111856	0.0209277	0.00610869	0.00746093	-0.0212573	-0.00406119	0.544087	4.48188	0.00996545	0.0762341	-0.0361908	1.11785
Q9UIQ6	LNPEP	Leucyl-cystinyl aminopeptidase OS=Homo sapiens OX=9606 GN=LNPEP PE=1 SV=3	0.00231872	-0.00231872	0.0359459	0.0326336	-0.0202812	0.00445185	-0.00275758	0.0333122	0.034567	0.0175147	0.0501858	-0.0135239	0.0494525	0.055029	0.0314996	0.0491249	0	0.0369779	0.0592172	0.00593353	0.000267305	0.0397684	0.0264472	0.0787748	0.367838	4.10385	0.0100035	0.0764434	0.039471	1.11666
P30740	SERPINB1	Leukocyte elastase inhibitor OS=Homo sapiens OX=9606 GN=SERPINB1 PE=1 SV=1	0.00179826	-0.00179826	0.0229032	0.0259533	0.0412365	0.0370249	0.0187161	0.0115924	-0.00537446	-0.00231498	0.00538401	0.01702	0.0188288	0.033753	0.045093	0.0780269	0	-0.00060275	0.0128288	0.0183224	-0.00566128	-0.0253709	-0.0379886	0.0236289	0.543635	3.47666	0.0100315	0.07656	0.0492643	1.116
P33240	CSTF2	Cleavage stimulation factor subunit 2 OS=Homo sapiens OX=9606 GN=CSTF2 PE=1 SV=1	0.0227529	-0.0227529	-0.0310411	-0.038411	-0.0202887	-0.0563095	-0.051461	-0.0572275	0.0257477	-0.0685748	-0.0397763	-0.0561115	-0.103738	-0.0565577	-0.0422193	-0.0459429	0	0.027575	0.0181095	0.051862	0.0307063	0.0240235	0.00808702	0.0473474	0.372633	6.3	0.0100403	0.07656	-0.067505	1.116
J3KP75	PHACTR2	Isoform of O75167, Phosphatase and actin regulator OS=Homo sapiens OX=9606 GN=PHACTR2 PE=1 SV=1	0.0234009	-0.0234009	0.0306681	0.020079	0.0175471	0.0164371	0.0729789	0.00736912	0.046822	0.0253314	0.0543327	0.0564664	0.0773188	0.0292695	0.0110375	0.0462342	0	0.0351659	-0.00288138	0.00237909	0.0104441	0.0369264	-0.018001	0.017811	0.400022	5.86394	0.0101282	0.0771474	0.0481867	1.11268
O94819	KBTBD11	Kelch repeat and BTB domain-containing protein 11 OS=Homo sapiens OX=9606 GN=KBTBD11 PE=1 SV=1	0.00884767	-0.00884767	-0.0393549	-0.0299767	-0.0899149	-0.00930348	-0.0148425	-0.0316365	-0.0703441	-0.0334111	-0.0460343	-0.00893452	-0.0275599	-0.0326164	-0.0702146	-0.0697139	0	0.00759773	0.0533694	0.0659514	0.0566142	0.0319305	0.0356909	-0.0323733	0.387371	6.07737	0.0101595	0.0773031	-0.0420438	1.1118
P35080	PFN2	Profilin-2 OS=Homo sapiens OX=9606 GN=PFN2 PE=1 SV=3	0.016487	-0.016487	-0.117739	-0.174093	-0.0346308	-0.0487089	-0.0978078	-0.0484806	-0.0891959	-0.109899	-0.054186	-0.164342	-0.100391	-0.119533	-0.108923	-0.0692914	0	-0.0733381	0.0820808	-0.0222326	0.0947537	0.0454011	0.0472381	0.102002	0.540609	6.3	0.010174	0.0773312	-0.0954691	1.11165
Q16543	CDC37	Hsp90 co-chaperone Cdc37 OS=Homo sapiens OX=9606 GN=CDC37 PE=1 SV=1	0.00717608	-0.00717608	-0.0101237	-0.0466266	0.0146987	0.0116808	-0.0476569	-0.0336325	0.0524217	0.0325988	0.038198	0.014177	0.017386	0.0259066	0.0590234	0.0177521	0	0.0562127	0.00594596	0.0140858	0.102144	0.0895669	0.0648687	0.0336674	0.542515	4.73582	0.0101967	0.0773854	0.0434085	1.11134
P01871	IGHM	Immunoglobulin heavy constant mu OS=Homo sapiens OX=9606 GN=IGHM PE=1 SV=4	0.0365334	-0.0365334	-0.0890422	-0.0292142	0.120051	-0.0298557	-0.0140487	0.0341551	-0.0578198	-0.0285718	-0.0912722	-0.0935067	-0.133003	-0.0135551	-0.201002	-0.122919	0	-0.0123437	0.00410153	-0.0409834	0.0221475	0.00724705	-0.0298722	-0.0514901	0.499068	3.36344	0.0102055	0.0773854	-0.152551	1.11134
O95081	AGFG2	Arf-GAP domain and FG repeat-containing protein 2 OS=Homo sapiens OX=9606 GN=AGFG2 PE=1 SV=2	0.00384146	-0.00384146	-0.100843	0.00172171	-0.0739711	-0.0245878	-0.132201	-0.0323273	-0.0353805	0.0579794	-0.0906391	-0.0621571	-0.15624	-0.0523157	-0.176227	-0.0759661	0	0.0703251	0.0450938	0.0752262	0.0198708	-0.00713677	-0.00144466	0.0301008	0.367312	4.01073	0.0102137	0.0773854	-0.0868904	1.11134
A0A2R8YDR3	TSC2	Isoform of P49815, Tuberin (Fragment) OS=Homo sapiens OX=9606 GN=TSC2 PE=1 SV=1	-0.0256663	0.0256663	0.0664034	0.0153327	0.00484302	0.000352789	0.0142089	-0.0555161	-0.0113658	-0.0339256	-0.0402246	-0.0229985	-0.0313029	-0.0290885	-0.0393228	-0.0663734	0	0.0236694	0.0134963	-0.0016417	0.0186573	0.00239361	-0.0221898	-0.00199451	0.449236	5.09478	0.0102617	0.0776663	-0.0487589	1.10977
Q9GZM8	NDEL1	Nuclear distribution protein nudE-like 1 OS=Homo sapiens OX=9606 GN=NDEL1 PE=1 SV=1	0.0045639	-0.0045639	0.0191281	-0.0282292	-0.0536538	0.0578782	0.0192352	-0.0449156	-0.0958021	0.0923526	-0.017677	0.220388	0.22029	0.0515224	0.169076	0.190968	0	0.049876	0.0111911	0.0551574	0.0109899	0.0353856	0.0848365	0.107629	0.541874	4.06493	0.0102923	0.0778151	0.168516	1.10894
Q9NXA8	SIRT5	NAD-dependent protein deacylase sirtuin-5, mitochondrial OS=Homo sapiens OX=9606 GN=SIRT5 PE=1 SV=2	0.00481909	-0.00481909	-0.0623143	-0.0462098	-0.0504389	-0.0818652	-0.118396	-0.0347757	-0.0143387	-0.0671742	-0.0399051	-0.17349	-0.11692	-0.0851246	-0.0393573	-0.0667346	0	-0.0321471	-0.0234391	-0.0625437	-0.00185665	-0.00482481	0.000500939	-0.0405417	0.430076	6.3	0.0103084	0.0778541	-0.0833516	1.10872
S4R410	ZSWIM8	Isoform of A7E2V4, Zinc finger SWIM domain-containing protein 8 OS=Homo sapiens OX=9606 GN=ZSWIM8 PE=1 SV=1	0.0607166	-0.0607166	0.098042	0.0225327	0.0221013	0.0245288	0.0273823	-0.016678	0.0865008	0.0333944	0.150044	0.108468	0.0893043	0.0545847	0.0806152	0.0896629	0	0.0667017	0.039091	0.0885479	0.0588308	0.0148192	0.0388803	0.0230987	0.430286	4.53147	0.0105051	0.0792553	0.0776567	1.10097
Q14116	IL18	Interleukin-18 OS=Homo sapiens OX=9606 GN=IL18 PE=1 SV=1	0.0198997	-0.0198997	0.0544348	0.00524281	-0.00693144	0.0120671	0.0121793	0.0114916	0.0409557	-0.021696	0.0680348	0.0640184	0.032353	0.0177989	0.0827322	0.0467591	0	0.012343	0.0443891	0.0789289	0.0689407	0.00809035	0.00856826	-0.0416782	0.446327	4.34953	0.010518	0.0792686	0.0431887	1.1009
P06703	S100A6	Protein S100-A6 OS=Homo sapiens OX=9606 GN=S100A6 PE=1 SV=1	0.0380448	-0.0380448	0.0360934	0.0104815	-0.0293392	-0.00323138	0.0165907	-0.012829	-0.0453251	-0.0334282	-0.0270563	0.050859	0.0252579	0.0340798	0.0868198	0.102323	0	-0.0130822	-0.00353895	0.0423814	0.0261813	0.00423638	0.0361742	0.0361203	0.539864	3.29005	0.0105969	0.079779	0.0982647	1.09811
P10398	ARAF	Serine/threonine-protein kinase A-Raf OS=Homo sapiens OX=9606 GN=ARAF PE=1 SV=2	-0.0275513	0.0275513	-0.0313276	0.0300841	-0.0280244	-0.0378798	0.00242968	-0.0260611	0.0292473	-0.0616374	-0.0355037	-0.0707341	-0.0390212	-0.0849349	-0.0306624	-0.0765853	0	-0.00046439	-0.0232442	0.0219301	-0.00495111	-0.0568148	-0.035161	-0.0367561	0.380831	4.29584	0.0106155	0.0798349	-0.0488141	1.09781
P62879	GNB2	Guanine nucleotide-binding protein G(I)/G(S)/G(T) subunit beta-2 OS=Homo sapiens OX=9606 GN=GNB2 PE=1 SV=3	-0.0383594	0.0383594	-0.10037	-0.0257445	-0.0785791	-0.0183018	0.0134509	-0.0700349	0.0720526	0.0628936	-0.034154	-0.178825	-0.234352	-0.0471162	-0.162294	-0.26897	0	0.00548728	0.168695	0.0709208	0.13166	0.0864176	0.0634663	0.0571116	0.539515	4.01374	0.0106505	0.0800133	-0.16614	1.09684
P62873	GNB1	Guanine nucleotide-binding protein G(I)/G(S)/G(T) subunit beta-1 OS=Homo sapiens OX=9606 GN=GNB1 PE=1 SV=3	-0.0362494	0.0362494	-0.0861744	-0.0434523	0.00218907	-0.00283798	0.0248249	-0.0161938	-0.0148023	-0.0219004	-0.0617989	-0.104312	-0.096228	-0.00667263	-0.14749	-0.0941571	0	0.116079	0.145567	0.0301772	0.0962723	0.0290736	0.140494	0.12473	0.452175	4.2888	0.0106689	0.080067	-0.074126	1.09655
Q9NZM1	MYOF	Myoferlin OS=Homo sapiens OX=9606 GN=MYOF PE=1 SV=1	-0.00339208	0.00339208	-0.101519	-0.0416388	-0.057922	0.0261676	-0.0130494	-0.0272679	0.025527	0.0129686	-0.0830391	-0.0555814	-0.0940554	-0.0365853	-0.128414	-0.123363	0	0.017911	0.0454764	-0.0425267	-0.0323519	-0.0586445	0.0460758	-0.00603789	0.508852	4.03647	0.0107203	0.0803685	-0.0808821	1.09491
O95926	SYF2	Pre-mRNA-splicing factor SYF2 OS=Homo sapiens OX=9606 GN=SYF2 PE=1 SV=1	0.0325842	-0.0325842	0.103455	0.0423312	0.044707	0.0424614	0.0646766	0.109254	0.0791796	0.0711856	0.118977	0.0572943	0.11301	0.0349494	0.0558541	0.0596672	0	0.10114	0.0490587	0.0433322	0.00824868	0.0107766	0.0701454	0.0898634	0.510781	6.3	0.010743	0.0804539	0.0712367	1.09445
H3BUN4	NOL3	Isoform of O60936, Nucleolar protein 3 (Fragment) OS=Homo sapiens OX=9606 GN=NOL3 PE=1 SV=1	-0.0371244	0.0371244	0.0347631	-0.045565	-0.0621214	0.00493792	0.0472503	0.0179936	0.00548215	0.0724431	0.0626239	-0.0188538	0.0530081	0.0111457	0.121251	0.153	0	-0.0281692	0.0866446	0.0709506	0.0473275	0.0579411	0.0485101	-0.0626589	0.538839	3.16666	0.010755	0.0804594	0.128323	1.09442
Q9UH65	SWAP70	Switch-associated protein 70 OS=Homo sapiens OX=9606 GN=SWAP70 PE=1 SV=1	-0.011827	0.011827	0.0105371	0.031133	0.00537358	-0.000281598	0.00762452	-0.00208564	0.0040795	-0.0143731	0.00905828	0.00241312	0.0163316	0.0119056	0.0283361	0.0550514	0	0.0367237	0.0246735	0.0398224	0.0240308	-0.000309622	0.0219934	0.0245478	0.538601	3.3094	0.0107921	0.0806071	0.0380237	1.09363
Q99698	LYST	Lysosomal-trafficking regulator OS=Homo sapiens OX=9606 GN=LYST PE=1 SV=3	0.0315532	-0.0315532	0.0193506	-0.0053033	-0.0678369	-0.051217	-0.0717052	-0.107219	-0.0406492	-0.052165	-0.0719486	-0.096378	-0.0243921	-0.0247343	-0.0249222	-0.063052	0	0.0263316	0.0116289	0.0430002	0.0120157	0.0261976	-0.0160806	0.00767164	0.538566	5.74049	0.0107974	0.0806071	-0.0605724	1.09363
Q8WWW0-2	RASSF5	Isoform of Q8WWW0, Isoform 2 of Ras association domain-containing protein 5 OS=Homo sapiens OX=9606 GN=RASSF5 PE=1 SV=1	0.0132493	-0.0132493	-0.0671786	-0.0541785	-0.0179226	-0.0631746	0.0180732	-0.0396061	0.00517949	-0.0512241	-0.0365374	-0.0755227	-0.104226	-0.0937165	-0.0442937	-0.0544787	0	0.0907746	0.0250371	-0.0590411	0.0718443	0.0696498	-0.0307557	0.0318526	0.317407	6.3	0.0108424	0.0806827	-0.0484838	1.09322
Q15785	TOMM34	Mitochondrial import receptor subunit TOM34 OS=Homo sapiens OX=9606 GN=TOMM34 PE=1 SV=2	-0.0349549	0.0349549	0.117894	0.097577	0.0778258	0.0919336	0.158271	0.0434544	0.0416028	0.104625	0.065373	0.0525268	0.103935	0.0713059	0.0597429	0.0736126	0	0.0804878	0.0767802	0.0659236	0.0836788	0.0786119	0.124677	0.092627	0.538209	6.3	0.0108532	0.0806827	0.0828237	1.09322
Q5EG05	CARD16	Caspase recruitment domain-containing protein 16 OS=Homo sapiens OX=9606 GN=CARD16 PE=1 SV=1	0.0113439	-0.0113439	-0.0861595	-0.00965522	0.037871	-0.00887515	-0.114554	-0.0227219	0.0261029	0.0437104	0.0438443	0.0681461	0.0132556	0.0699786	0.0994146	0.100971	0	0.00289296	0.0154665	0.0228615	0.0496489	-0.0655513	0.0581791	0.0632149	0.538019	4.55171	0.010883	0.0806827	0.0863479	1.09322
Q86TB9	PATL1	Protein PAT1 homolog 1 OS=Homo sapiens OX=9606 GN=PATL1 PE=1 SV=2	0.0247912	-0.0247912	0.0542112	0.0315425	0.0319751	0.0141247	0.0640148	0.0171416	0.0350473	0.0517567	-0.00229844	0.0169358	0.0444203	0.0465775	0.0666077	0.0630828	0	-0.0328595	-0.00428487	-0.0460712	-0.0138619	-0.0160699	-0.0242848	-0.0420287	0.33716	6.3	0.0108965	0.0806827	0.0770318	1.09322
Q9Y5J6	TIMM10B	Mitochondrial import inner membrane translocase subunit Tim10 B OS=Homo sapiens OX=9606 GN=TIMM10B PE=1 SV=1	0.0244003	-0.0244003	0.0178634	0.0155488	-0.0817911	-0.016425	-0.0656494	0.0129374	0.0187353	-0.0260428	0.0450661	-0.266304	-0.124184	-0.00104	-0.22909	-0.282927	0	-0.0865342	0.0468353	0.060362	-0.0655795	-0.064152	0.239385	-0.0488497	0.527672	3.1961	0.010902	0.0806827	-0.222674	1.09322
P61758	VBP1	Prefoldin subunit 3 OS=Homo sapiens OX=9606 GN=VBP1 PE=1 SV=4	0.0138619	-0.0138619	0.0359583	0.0514309	0.010455	0.0198549	0.0214139	0.0543896	0.0276304	0.0206905	0.0183709	0.0603476	0.0680764	0.00889844	0.0255922	0.0766326	0	0.064752	0.0166758	0.0635102	0.0343042	0.00268688	0.0564279	0.0441738	0.344269	6.3	0.0109073	0.0806827	0.065883	1.09322
M0QXA7	WIZ	Isoform of O95785, Protein Wiz OS=Homo sapiens OX=9606 GN=WIZ PE=1 SV=1	0.034125	-0.034125	-0.0526973	0.019346	0.00135161	-0.0206839	-0.0272511	0.00126861	-0.00690605	-0.0318839	-0.0586126	-0.0538807	-0.0976642	-0.0585354	-0.0636796	-0.0129932	0	-0.0466637	-0.0518158	-0.0337231	-0.00246193	-0.0482559	-0.0164816	-0.0491672	0.431768	4.38301	0.010909	0.0806827	-0.0504213	1.09322
C9JRZ8	AKR1B15	Aldo-keto reductase family 1 member B15 OS=Homo sapiens OX=9606 GN=AKR1B15 PE=1 SV=2	-0.000294015	0.000294015	-0.117147	-0.0649447	-0.0996699	-0.0935321	-0.137832	-0.0893553	-0.190212	-0.179927	-0.145	-0.172263	-0.15039	-0.16125	-0.0703663	0.000154408	0	-0.348825	-0.220031	-0.142742	-0.175957	-0.296167	-0.369599	-0.232548	0.511164	6.3	0.0109279	0.0806827	-0.104378	1.09322
Q9HDC9	APMAP	Adipocyte plasma membrane-associated protein OS=Homo sapiens OX=9606 GN=APMAP PE=1 SV=2	-0.0795787	0.0795787	-0.262803	-0.0120684	0.00506875	-0.0430644	0.0142269	-0.187693	-0.083729	0.128985	-0.273129	-0.0956501	-0.296075	-0.13227	-0.259096	-0.315305	0	0.0454447	0.140834	-0.132852	-0.0662469	-0.0475745	0.0361267	0.264581	0.466029	4.04	0.0109288	0.0806827	-0.213941	1.09322
O15116	LSM1	U6 snRNA-associated Sm-like protein LSm1 OS=Homo sapiens OX=9606 GN=LSM1 PE=1 SV=1	-0.0415919	0.0415919	0.0360253	-0.0496073	0.0587734	0.100431	0.125813	0.129133	0.126148	0.0393132	0.121848	0.117797	0.035436	0.0198796	0.0761089	0.122282	0	0.143924	0.1282	0.151326	0.0719294	0.0713263	0.151244	0.0919846	0.537694	5.61974	0.010934	0.0806827	0.0936565	1.09322
Q7L9L4	MOB1B	MOB kinase activator 1B OS=Homo sapiens OX=9606 GN=MOB1B PE=1 SV=3	-0.00843235	0.00843235	-0.00213033	0.00893456	-0.00202774	-0.0378876	0.00192806	-0.0211803	-0.0188321	0.0335082	0.0135598	0.0370456	0.0240957	0.00878154	0.0578315	0.0441155	0	0.038733	0.0481871	0.132364	0.0761203	0.0341359	0.0921069	0.0743568	0.537633	3.32586	0.0109437	0.0806827	0.0516875	1.09322
Q7Z7F7	MRPL55	39S ribosomal protein L55, mitochondrial OS=Homo sapiens OX=9606 GN=MRPL55 PE=1 SV=1	0.154386	-0.154386	-0.0977239	-0.195135	-0.139305	-0.0939859	-0.18186	-0.180534	-0.126981	-0.1372	-0.16397	-0.244364	-0.244303	-0.207343	-0.227426	-0.0763084	NA	NA	NA	NA	NA	NA	NA	NA	0.400855	6.3	0.0109634	0.0806827	-0.207588	1.09322
Q9BSQ5	CCM2	Cerebral cavernous malformations 2 protein OS=Homo sapiens OX=9606 GN=CCM2 PE=1 SV=1	-0.0159648	0.0159648	0.0254121	0.0434541	0.0118326	0.0252114	0.0572108	0.0589453	0.0288503	0.096116	-0.0011698	0.0511809	0.129818	0.0493213	0.0482497	0.0361999	0	0.003351	0.0333179	0.0585432	0.046639	0.0017951	0.0109837	0.00399855	0.356498	5.44007	0.0109732	0.0806827	0.0439973	1.09322
Q9UBV8	PEF1	Peflin OS=Homo sapiens OX=9606 GN=PEF1 PE=1 SV=1	0.0078667	-0.0078667	-0.0095451	-0.00457322	0.0131871	0.054519	0.0283439	0.0143519	-0.0199173	0.00355088	-0.0102717	0.207998	0.121828	0.0697952	0.0660388	0.11621	0	0.104446	0.0992395	0.236021	0.107453	0.039416	0.126869	0.145664	0.503697	4.22928	0.010979	0.0806827	0.0889051	1.09322
Q92620	DHX38	Pre-mRNA-splicing factor ATP-dependent RNA helicase PRP16 OS=Homo sapiens OX=9606 GN=DHX38 PE=1 SV=2	-0.00728961	0.00728961	-0.00335731	0.00250108	-0.0105992	-0.0301651	-0.0369527	-0.0107605	-0.002112	0.00688283	-0.000841968	-0.0697363	-0.0338683	-0.0167966	-0.0492594	-0.0326857	0	0.00451099	-0.0313318	-0.013656	-0.000194255	-0.0212914	-0.02508	-0.0311048	0.360252	4.21739	0.0109913	0.0806827	-0.0269212	1.09322
A0A2R8YCL4	TASOR2	Isoform of Q5VWN6, Protein TASOR 2 (Fragment) OS=Homo sapiens OX=9606 GN=TASOR2 PE=4 SV=1	0.0244712	-0.0244712	-0.0700783	0.0141983	-0.0185414	-0.0365497	-0.0706199	-0.138308	-0.101642	-0.0476259	-0.00738364	-0.0518921	-0.100458	-0.098468	-0.0322535	-0.0930677	0	-0.0510471	-0.00102522	-0.0400711	-0.0559697	-0.0806354	-0.119173	-0.0480263	0.441331	5.47599	0.0109962	0.0806827	-0.0648618	1.09322
Q9BWE0	REPIN1	Replication initiator 1 OS=Homo sapiens OX=9606 GN=REPIN1 PE=1 SV=1	0.127484	-0.127484	-0.331681	-0.250826	-0.0942945	-0.139109	-0.318676	-0.139612	-0.126212	-0.182873	-0.171871	-0.157168	-0.338317	-0.216052	-0.304406	-0.185223	NA	NA	NA	NA	NA	NA	NA	NA	0.472258	6.3	0.0110114	0.0806827	-0.211112	1.09322
J3KS22	DCXR	Isoform of Q7Z4W1, L-xylulose reductase (Fragment) OS=Homo sapiens OX=9606 GN=DCXR PE=1 SV=8	0.00316126	-0.00316126	0.0401305	-0.0240734	0.0319812	-0.00287162	0.0444762	0.0138118	0.01132	-0.0404139	-0.0396893	-0.047032	-0.0232766	-0.0388251	-0.0236752	-0.0259426	0	-0.0319288	-0.0104083	-0.0345289	-0.0513832	-0.0262595	-0.00626268	-0.0320902	0.537146	4.53761	0.0110206	0.0806827	-0.0434197	1.09322
A6NFX8	NUDT5	Isoform of Q9UKK9, ADP-sugar pyrophosphatase OS=Homo sapiens OX=9606 GN=NUDT5 PE=1 SV=1	0.00936622	-0.00936622	0.0554874	0.0279958	0.0427315	0.0762932	0.0591095	0.0482857	0.064437	0.0328226	0.0549913	0.0500771	0.0493271	0.0193963	0.0389148	0.000387267	0	0.0622438	0.0329178	0.0120588	0.0277149	0.0322933	-0.000140413	0.0151343	0.537132	6.13184	0.0110228	0.0806827	0.044731	1.09322
O95182	NDUFA7	NADH dehydrogenase [ubiquinone] 1 alpha subcomplex subunit 7 OS=Homo sapiens OX=9606 GN=NDUFA7 PE=1 SV=3	0.0159895	-0.0159895	0.0317192	0.017563	0.0565205	0.0212582	0.0990285	0.0299699	0.0286193	0.0662101	0.088625	0.10914	0.0193679	0.0504093	0.03405	0.0526999	0	-0.0974394	0.11004	-0.239512	-0.108255	-0.218913	-0.186367	-0.0985752	0.473375	5.86847	0.0110356	0.0806936	0.0580366	1.09316
Q8IXQ6-2	PARP9	Isoform of Q8IXQ6, Isoform 2 of Protein mono-ADP-ribosyltransferase PARP9 OS=Homo sapiens OX=9606 GN=PARP9 PE=1 SV=2	-0.00711164	0.00711164	0.00670512	-0.0152029	-0.0116378	0.0213806	-0.0445584	-0.0472408	-0.0219929	0.024442	-0.046859	-0.064893	-0.0265673	-0.0384503	-0.0112545	-0.110176	0	-0.00527627	-0.0181016	0.00511129	0.00572945	-0.0205162	-0.00334197	0.0142935	0.378316	4.25347	0.0110577	0.0806943	-0.0424387	1.09316
Q96B97-2	SH3KBP1	Isoform of Q96B97, Isoform 2 of SH3 domain-containing kinase-binding protein 1 OS=Homo sapiens OX=9606 GN=SH3KBP1 PE=1 SV=2	0.0144167	-0.0144167	0.0182147	0.0106511	0.0258658	0.00873658	0.0216361	0.0621611	0.0664817	0.131222	0.0870457	0.0276458	0.0561483	0.0385614	0.040171	0.0342035	0	0.00277059	0.0370468	-0.134621	0.0344282	0.00462051	0.0153243	0.0946259	0.506585	5.27239	0.0110584	0.0806943	0.0542115	1.09316
P52630	STAT2	Signal transducer and activator of transcription 2 OS=Homo sapiens OX=9606 GN=STAT2 PE=1 SV=1	-0.0371052	0.0371052	-0.0215536	-0.015781	-0.0322493	-0.0467385	-0.0389801	-0.0301836	-0.0317874	0.00163766	-0.0489498	-0.0890494	-0.0342624	-0.0463298	-0.0259388	-0.0809361	0	0.0349767	0.0407701	0.0725239	0.0276639	-0.0042398	0.0238212	0.0231905	0.300301	4.29981	0.0110827	0.0807465	-0.0363369	1.09288
O60496	DOK2	Docking protein 2 OS=Homo sapiens OX=9606 GN=DOK2 PE=1 SV=2	-0.0332871	0.0332871	-0.0563387	-0.0397939	0.0217399	0.00697291	-0.0340678	-0.0585992	-0.0421578	0.022842	-0.0289968	-0.14997	-0.0433104	-0.0275695	-0.107075	-0.1357	0	0.0524938	0.0388704	0.0975258	0.0749986	0.0410474	0.047158	0.0774759	0.380474	4.26905	0.0110882	0.0807465	-0.0672908	1.09288
O60268	KIAA0513	Uncharacterized protein KIAA0513 OS=Homo sapiens OX=9606 GN=KIAA0513 PE=1 SV=1	0.016625	-0.016625	-0.0188316	-0.0278737	0.0100206	-0.0111369	0.0275938	0.0450379	0.043897	-0.0276783	-0.00409336	0.0268228	0.0378241	0.0281721	0.0952327	0.0393918	0	0.0155554	0.0318383	-0.0616157	-0.0297512	-0.0424733	-0.0571773	-0.00188134	0.449909	3.25915	0.0111024	0.0807671	0.0618724	1.09277
P45880	VDAC2	Voltage-dependent anion-selective channel protein 2 OS=Homo sapiens OX=9606 GN=VDAC2 PE=1 SV=2	-0.0410941	0.0410941	-0.318751	-0.126071	-0.0536877	-0.0380096	-0.138293	-0.153927	-0.043037	0.057008	-0.28335	-0.113937	-0.315319	-0.0952055	-0.254069	-0.27439	0	0.0618758	0.324522	-0.142878	-0.0283707	0.0514215	0.0460958	0.205569	0.373894	4.06423	0.0111609	0.0810516	-0.166866	1.09124
Q8IZL2	MAML2	Mastermind-like protein 2 OS=Homo sapiens OX=9606 GN=MAML2 PE=1 SV=2	0.0161929	-0.0161929	-0.0374316	-0.0588931	-0.08636	-0.0386308	-0.017777	-0.0763211	-0.0131901	-0.0816145	-0.0184358	-0.0366172	-0.143908	-0.080017	-0.113753	-0.0215794	0	-0.0118614	0.0112127	-0.044205	0.0155747	-0.0150034	-0.0352549	-0.0422725	0.344383	6.3	0.0111642	0.0810516	-0.106273	1.09124
Q8NFY9	KBTBD8	Kelch repeat and BTB domain-containing protein 8 OS=Homo sapiens OX=9606 GN=KBTBD8 PE=1 SV=2	0.00662399	-0.00662399	-0.0541112	-0.0370547	0.0117616	0.026817	-0.0741134	-0.0544946	-0.0255318	-0.0497269	-0.00857647	-0.114955	0.011262	-0.100252	-0.0779373	-0.095921	0	-0.0429871	-0.0266827	-0.052646	-0.0415937	0.00242448	0.0276926	-0.134029	0.341715	3.91438	0.0112203	0.0813237	-0.0926354	1.08978
Q9UJX2	CDC23	Cell division cycle protein 23 homolog OS=Homo sapiens OX=9606 GN=CDC23 PE=1 SV=3	0.00919069	-0.00919069	-0.0596414	0.0274856	-0.077073	-0.0175958	-0.0706299	-0.011728	-0.0315486	-0.0164631	-0.127846	-0.0283674	-0.0830179	-0.0557232	-0.0215741	-0.0864528	0	-0.0191887	-0.000634565	0.0119786	0.00575321	0.0204255	0.018968	0.00492767	0.34873	5.79953	0.0112245	0.0813237	-0.0802643	1.08978
P45983-4	MAPK8	Isoform of P45983, Isoform 4 of Mitogen-activated protein kinase 8 OS=Homo sapiens OX=9606 GN=MAPK8 PE=1 SV=2	-0.020361	0.020361	0.0407443	0.0556857	0.057554	0.0282566	0.0472977	0.0158089	0.030035	0.0313525	0.0800754	0.135664	0.0706051	0.0260936	0.134165	0.0103121	0	-0.0263487	-0.0524355	-0.0160517	-0.011572	-0.0425215	-0.0144348	-0.0160253	0.331249	4.42359	0.0112423	0.0813693	0.0516266	1.08954
Q07866-4	KLC1	Isoform of Q07866, Isoform J of Kinesin light chain 1 OS=Homo sapiens OX=9606 GN=KLC1 PE=1 SV=2	0.0149894	-0.0149894	0.0162137	0.0331763	-0.00614525	0.0126206	-0.0460966	0.00101198	-0.0153371	0.00202184	0.00952668	0.00168858	0.0362873	0.0442146	0.0351757	0.0611599	0	0.0407073	0.0070848	0.0370593	0.0574141	0.0402812	0.0527708	0.0636813	0.53561	3.73428	0.0112664	0.0814453	0.0482543	1.08913
C9JQ41	MIX23	Isoform of Q4VC31, Coiled-coil domain-containing protein 58 OS=Homo sapiens OX=9606 GN=MIX23 PE=1 SV=1	0.0135934	-0.0135934	-0.00358861	-0.028087	0.0232805	0.0012777	0.0492712	-0.0328251	-0.044887	0.000264265	-0.00797414	-0.0663838	-0.0609849	-0.045545	-0.0585536	-0.0416382	0	0.0186764	0.0263988	0.0723921	-0.0198755	0.00951678	0.0163281	-0.0152999	0.49435	4.38582	0.0112756	0.0814453	-0.0511269	1.08913
Q8WXA9-2	SREK1	Isoform of Q8WXA9, Isoform 2 of Splicing regulatory glutamine/lysine-rich protein 1 OS=Homo sapiens OX=9606 GN=SREK1 PE=1 SV=1	0.0207146	-0.0207146	0.050285	0.0647682	0.031422	0.0696954	0.0515725	0.0660084	0.0945301	0.0840062	0.039039	0.0649381	0.0493813	0.0980504	0.0218495	0.0274335	0	-0.00127704	-0.0532743	-0.0300498	0.0290442	0.0340357	-0.0126607	-0.0479637	0.535315	6.3	0.0113141	0.0814842	0.0581633	1.08893
Q9BUP0	EFHD1	EF-hand domain-containing protein D1 OS=Homo sapiens OX=9606 GN=EFHD1 PE=1 SV=1	0.0052619	-0.0052619	0.0487511	0.0496732	0.0237186	-0.00889598	0.0116341	0.000815093	-0.00038247	0.0720583	0.0754252	0.0794005	0.0444108	0.0525991	0.00928331	0.0927909	0	0.0853566	0.0586963	0.0133853	0.0704876	-0.00908608	0.0735547	0.134492	0.418075	4.52314	0.0113151	0.0814842	0.0464159	1.08893
Q92572	AP3S1	AP-3 complex subunit sigma-1 OS=Homo sapiens OX=9606 GN=AP3S1 PE=1 SV=1	-0.0339524	0.0339524	0.0136164	0.0401935	0.0124725	0.000515909	-0.0188332	-0.00905976	-0.00811166	-0.0329008	-0.0513631	-0.0426524	-0.0665938	-0.0331643	-0.0264293	-0.0247292	0	0.0824824	0.0665679	0.0886782	0.0620235	0.0954601	0.133297	0.030368	0.5034	4.83016	0.0113153	0.0814842	-0.048643	1.08893
A3KN83	SBNO1	Protein strawberry notch homolog 1 OS=Homo sapiens OX=9606 GN=SBNO1 PE=1 SV=1	-0.00792332	0.00792332	-0.020535	0.0129675	0.0114983	-0.0327736	0.00418036	-0.0320225	-0.0471948	-0.0244461	-0.072215	-0.0686177	-0.0567886	-0.0473448	-0.0660469	0.0192741	0	0.0337219	0.00666008	-0.000236601	-0.0251915	0.0146822	-0.00891831	-0.00682274	0.454482	4.77191	0.0113349	0.0815427	-0.0444636	1.08861
Q16610	ECM1	Extracellular matrix protein 1 OS=Homo sapiens OX=9606 GN=ECM1 PE=1 SV=2	-0.1982	0.1982	-0.273162	-0.328076	-0.420905	-0.360295	-0.282109	-0.234045	-0.23403	-0.208022	-0.256532	-0.277604	-0.310272	-0.180176	-0.250505	-0.264293	NA	NA	NA	NA	NA	NA	NA	NA	0.534917	6.3	0.0113787	0.0816515	-0.277204	1.08804
Q7Z5R6	APBB1IP	Amyloid beta A4 precursor protein-binding family B member 1-interacting protein OS=Homo sapiens OX=9606 GN=APBB1IP PE=1 SV=1	-0.0171329	0.0171329	0.0181926	0.0136759	-0.00192137	0.0185732	0.0277022	0.0104232	-0.0255237	-0.0286895	-0.0119348	-0.0275662	-0.0316655	-0.00367923	-0.00647646	-0.0183955	0	0.0463976	0.0185289	0.0327648	0.0369347	0.00329209	0.0165705	-0.0151981	0.534866	4.75463	0.011387	0.0816515	-0.0279441	1.08804
Q9UBT6	POLK	DNA polymerase kappa OS=Homo sapiens OX=9606 GN=POLK PE=1 SV=1	0.0448207	-0.0448207	0.01305	0.0243728	0.0207007	0.0576506	-0.0422525	0.0507238	-0.00615421	-0.000724662	0.0284459	0.156421	0.0442673	0.110754	0.0821347	0.131616	0	-0.0920497	-0.0989929	-0.119293	-0.0722577	-0.0890299	-0.10475	-0.0251009	0.4902	4.19982	0.0113927	0.0816515	0.0829926	1.08804
Q9Y657	SPIN1	Spindlin-1 OS=Homo sapiens OX=9606 GN=SPIN1 PE=1 SV=3	0.0113499	-0.0113499	-0.00792679	-0.0162353	-0.0251511	0.0258235	-0.0281246	-0.00669084	-0.0118697	0.00336883	0.0195554	0.0121189	0.0184922	0.0160734	0.0292552	0.0442811	0	0.0657743	0.00193618	-0.0238927	0.0363248	-0.0415676	0.0197069	0.0351357	0.534811	3.68192	0.0113959	0.0816515	0.0408173	1.08804
Q16799	RTN1	Reticulon-1 OS=Homo sapiens OX=9606 GN=RTN1 PE=1 SV=1	0.0278005	-0.0278005	0.0257543	0.0252443	0.0317746	0.0433234	0.00503266	0.00350619	-0.00193479	-0.00191055	0.0698811	0.0320806	0.0578423	0.0395512	0.0625347	0.0391362	0	0.034791	0.0235766	0.129073	0.0465681	0.0745232	0.0776757	0.0489628	0.465861	4.20278	0.0114544	0.0819884	0.0394854	1.08625
A0A6Q8PFJ4	MFN2	Isoform of O95140, Mitofusin-2 OS=Homo sapiens OX=9606 GN=MFN2 PE=1 SV=1	0.0445912	-0.0445912	-0.239939	-0.152022	-0.000292082	-0.16404	-0.221176	-0.144926	-0.103729	-0.0827276	-0.177968	-0.0482335	-0.245531	-0.241487	-0.160416	-0.120398	0	0.141023	0.134952	0.135452	0.074143	0.00610407	0.108213	0.10419	0.466792	6.3	0.0115056	0.0822716	-0.150186	1.08475
Q9HAF1	MEAF6	Chromatin modification-related protein MEAF6 OS=Homo sapiens OX=9606 GN=MEAF6 PE=1 SV=1	-0.012175	0.012175	-0.00763321	0.0387437	0.0618745	0.0663024	0.0850619	0.0610005	-0.00926487	0.0839983	0.0383123	0.0594122	0.0673818	0.0373245	0.0494534	0.0471349	0	0.0705898	-0.0174573	-0.0386964	-0.181117	-0.122333	-0.277038	-0.321701	0.534006	5.9548	0.0115279	0.0822809	0.0540024	1.0847
Q6DN03	H2BC20P	Putative histone H2B type 2-C OS=Homo sapiens OX=9606 GN=H2BC20P PE=5 SV=3	-0.029889	0.029889	-0.108586	-0.0188802	0.0291456	0.0546737	0.0513973	-0.0379185	-0.0200246	4.28189e-05	-0.174463	-0.0666512	-0.165899	-0.0345998	-0.148654	-0.0828895	0	0.00921595	0.0174563	-0.305245	-0.132962	-0.0839355	-0.00619146	-0.0144034	0.533993	4.38914	0.01153	0.0822809	-0.109199	1.0847
Q8N1Q1	CA13	Carbonic anhydrase 13 OS=Homo sapiens OX=9606 GN=CA13 PE=1 SV=1	-0.108099	0.108099	0.0913606	0.131586	0.129841	0.105891	0.070328	0.0633118	0.0747426	0.169516	0.0743361	0.198884	0.120147	0.16602	0.0978837	0.171149	NA	NA	NA	NA	NA	NA	NA	NA	0.381491	6.3	0.0115485	0.0823007	0.120251	1.0846
C9JA28	SSR3	Isoform of Q9UNL2, Signal sequence receptor subunit gamma OS=Homo sapiens OX=9606 GN=SSR3 PE=1 SV=1	-0.0321818	0.0321818	-0.172676	0.0312473	0.0965341	0.071047	-0.0159683	-0.190018	-0.11902	0.064348	-0.263667	-0.0941857	-0.215843	-0.0298273	-0.259535	-0.192516	0	0.0448543	0.45384	-0.14674	-0.239088	0.0536894	0.251138	0.306958	0.405182	4.3848	0.0115558	0.0823007	-0.157975	1.0846
F5H875	CHMP1A	Isoform of Q9HD42, Charged multivesicular body protein 1a OS=Homo sapiens OX=9606 GN=CHMP1A PE=1 SV=3	-0.00604701	0.00604701	-0.00104783	0.0171467	0.097769	0.0499537	0.0276809	0.0495985	0.0328176	-0.0210998	0.0628171	0.0761572	0.0793523	0.0787374	0.172406	-0.00131952	0	-0.0150571	-0.225447	-0.106018	-0.0148741	-0.166758	-0.142952	-0.145599	0.327133	4.06643	0.0115757	0.0823194	0.0612302	1.0845
J3KPM9	STAT1	Isoform of P42224, Signal transducer and activator of transcription OS=Homo sapiens OX=9606 GN=STAT1 PE=1 SV=1	0.0275929	-0.0275929	0.104414	-0.0910556	-0.0937779	0.0041015	-0.283562	-0.0572599	-0.215909	-0.211194	-0.241177	-0.260095	-0.152525	0.0885751	-0.480754	-0.1173	0	0.0794959	-0.222655	-0.0232577	0.0360486	-0.110467	0.0955866	-0.171985	0.401669	5.32251	0.0115816	0.0823194	-0.201317	1.0845
Q9UJA5	TRMT6	tRNA (adenine(58)-N(1))-methyltransferase non-catalytic subunit TRM6 OS=Homo sapiens OX=9606 GN=TRMT6 PE=1 SV=1	0.00127118	-0.00127118	0.00824452	0.0176667	0.0100717	0.0227418	-0.0303773	0.00835412	0.0154563	0.0134706	0.0265627	0.0318683	0.0326814	0.00513864	0.020471	0.059391	0	0.0549803	0.059655	0.0850477	0.0782288	0.0547732	0.0399382	0.0446258	0.417241	4.50677	0.0116592	0.0827306	0.0256823	1.08233
Q8NF37	LPCAT1	Lysophosphatidylcholine acyltransferase 1 OS=Homo sapiens OX=9606 GN=LPCAT1 PE=1 SV=2	0.039422	-0.039422	-0.184144	-0.0906228	-0.0521519	-0.190636	-0.174905	-0.179922	-0.0386715	-0.0274028	-0.0790034	-0.0824008	-0.178285	-0.131416	-0.191796	-0.146051	0	0.219282	0.170951	0.282807	0.0677284	0.138457	0.049713	0.0507962	0.211352	3.67675	0.0116664	0.0827306	-0.090995	1.08233
C9JPR7	CLEC5A	Isoform of Q9NY25, C-type lectin domain family 5 member A OS=Homo sapiens OX=9606 GN=CLEC5A PE=1 SV=1	-0.0690228	0.0690228	0.121168	0.0453475	0.125239	0.0618922	0.0594247	0.0688154	-0.000736375	0.167194	0.172245	0.186028	0.0544447	0.0185154	0.172622	0.181982	NA	NA	NA	NA	NA	NA	NA	NA	0.238754	4.50744	0.0116743	0.0827306	0.0827853	1.08233
Q7Z6J4	FGD2	FYVE, RhoGEF and PH domain-containing protein 2 OS=Homo sapiens OX=9606 GN=FGD2 PE=1 SV=1	0.0209882	-0.0209882	0.050094	-0.0409374	0.0360252	0.0491527	0.0974188	0.0317031	0.0482084	0.0344362	-0.00233761	0.0485214	0.0312914	0.0758476	0.0701819	0.0624494	0	0.0372013	0.0243807	0.0765432	0.0640182	0.00572377	0.023403	0.0220478	0.405399	5.73071	0.011797	0.0834478	0.0495919	1.07859
Q9Y4X5	ARIH1	E3 ubiquitin-protein ligase ARIH1 OS=Homo sapiens OX=9606 GN=ARIH1 PE=1 SV=2	-0.0355685	0.0355685	0.0266014	-0.0268483	-0.0403808	-0.0379296	-0.0047077	-0.0301055	-0.0516933	-0.0702494	-0.0269093	-0.158621	-0.0841537	-0.0615103	-0.0201736	-0.0685364	0	0.0615805	0.0242591	0.0693555	0.0255076	0.0470361	0.00141837	-0.0298128	0.397575	4.76481	0.0117989	0.0834478	-0.0603619	1.07859
Q9H3H1	TRIT1	tRNA dimethylallyltransferase OS=Homo sapiens OX=9606 GN=TRIT1 PE=1 SV=1	-0.0344654	0.0344654	0.0346353	-0.0234245	0.0693447	0.105164	0.0916031	0.0585371	-0.0370749	0.031402	0.0409654	0.199724	0.176124	0.0162678	0.110903	0.127312	NA	NA	NA	NA	NA	NA	NA	NA	0.345709	4.23072	0.0118128	0.0834631	0.0845958	1.07851
O75937	DNAJC8	DnaJ homolog subfamily C member 8 OS=Homo sapiens OX=9606 GN=DNAJC8 PE=1 SV=2	0.0261178	-0.0261178	0.0160597	0.0107037	0.0242382	0.0110728	0.0278787	0.00364148	0.0276044	-0.0142007	0.0559515	0.0287125	0.0291216	0.0252301	0.0532429	0.0292928	0	-0.0360142	-0.0512035	-0.0879315	-0.0398489	-0.0540963	-0.0387837	0.0106894	0.360163	4.2822	0.0118259	0.0834726	0.02806	1.07846
Q5GLZ8	HERC4	Probable E3 ubiquitin-protein ligase HERC4 OS=Homo sapiens OX=9606 GN=HERC4 PE=1 SV=1	0.000711115	-0.000711115	-0.034731	-0.0234272	-0.00531692	0.0103226	-0.0715526	-0.034185	0.00376939	-0.0168366	-0.0786088	-0.0525497	-0.01927	-0.0280311	-0.0298604	-0.0695068	0	0.0366063	0.0331246	0.0526825	0.055409	-0.00815233	0.0318912	0.0268831	0.311854	4.28371	0.0118615	0.0836415	-0.0319889	1.07758
Q96QH2	PRAM1	PML-RARA-regulated adapter molecule 1 OS=Homo sapiens OX=9606 GN=PRAM1 PE=1 SV=3	0.00164637	-0.00164637	0.0214431	0.0047732	0.00445831	0.00189835	-0.00391462	-0.0379545	-0.01442	-0.0242342	0.0360862	0.00927459	0.0136838	0.0258413	0.0381625	0.0359178	0	0.0265882	0.0338525	0.0430409	0.0307678	0.00486211	0.0321065	0.00304341	0.53188	4.07678	0.0118821	0.0837036	0.0324026	1.07726
Q96I15	SCLY	Selenocysteine lyase OS=Homo sapiens OX=9606 GN=SCLY PE=1 SV=4	0.033448	-0.033448	0.0141675	0.000289542	0.00518186	0.0311662	0.0290644	0.0167768	0.021477	0.0039842	0.0146893	0.0217794	0.0228958	0.037931	0.0404209	0.0614573	0	0.0341685	0.0122639	0.00737876	0.0336999	0.015271	-0.00568539	0.00246253	0.352853	3.2816	0.0119242	0.0838382	0.0412543	1.07656
P85037	FOXK1	Forkhead box protein K1 OS=Homo sapiens OX=9606 GN=FOXK1 PE=1 SV=1	0.00946562	-0.00946562	-0.0223269	0.00834093	-0.0522869	-0.0414581	-0.0291296	-0.0348188	-0.047168	-0.0608089	-0.0578426	-0.0479668	-0.0192782	-0.0165343	-0.0479356	-0.000631704	0	0.069663	0.0337042	0.0333056	0.0225448	0.0169563	0.0287939	0.0507821	0.531628	5.92576	0.0119248	0.0838382	-0.0379955	1.07656
Q16831	UPP1	Uridine phosphorylase 1 OS=Homo sapiens OX=9606 GN=UPP1 PE=1 SV=1	0.0192005	-0.0192005	0.0235917	0.00256532	-0.00475018	-0.0398986	-0.0188664	0.00740898	-0.00248197	-0.029852	0.00372169	-0.0213467	-0.0588369	-0.0393018	-0.0237348	-0.0456658	0	0.0527443	0.0174749	0.0837642	0.0208682	-0.00262097	-0.0125388	-0.0146343	0.383471	3.91601	0.011963	0.0840243	-0.0414033	1.0756
Q08AD1	CAMSAP2	Calmodulin-regulated spectrin-associated protein 2 OS=Homo sapiens OX=9606 GN=CAMSAP2 PE=1 SV=3	0.0356424	-0.0356424	-0.113199	-0.181316	-0.0601357	-0.0391979	-0.216228	-0.0364935	-0.323147	-0.149339	-0.227616	-0.00349936	-0.125763	-0.0848857	-0.208912	-0.195619	0	-0.00231353	0.0306752	0.0431171	-0.0177853	-0.0908488	-0.101944	-0.0397696	0.369845	6.3	0.0120099	0.0842601	-0.191201	1.07438
Q9UKN7	MYO15A	Unconventional myosin-XV OS=Homo sapiens OX=9606 GN=MYO15A PE=1 SV=2	-0.0865637	0.0865637	0.129375	0.12376	0.194847	0.0776533	0.0164347	0.12908	-0.000786198	0.152435	-0.0440977	0.139189	0.184355	0.157711	0.247339	0.261539	NA	NA	NA	NA	NA	NA	NA	NA	0.408181	3.5346	0.0120203	0.0842601	0.188879	1.07438
Q9Y6Q9	NCOA3	Nuclear receptor coactivator 3 OS=Homo sapiens OX=9606 GN=NCOA3 PE=1 SV=1	-0.00992141	0.00992141	0.0148968	0.0385618	0.0279363	0.0568435	-0.0290228	0.0226212	0.0423539	0.0310262	0.0557296	0.0178825	0.0266115	0.0379481	0.0682215	0.0333276	0	0.0281211	-0.0101527	-0.000878575	0.0405192	0.0133442	0.00182723	0.00086732	0.284793	4.62002	0.012053	0.0844063	0.0267881	1.07363
Q92854	SEMA4D	Semaphorin-4D OS=Homo sapiens OX=9606 GN=SEMA4D PE=1 SV=1	0.0109781	-0.0109781	0.0127832	-0.00997805	0.0198551	0.0159206	0.00806117	0.00959951	0.0415712	0.0103515	0.036031	0.00572757	0.00303743	0.0134911	0.0733593	0.0241918	0	0.0143284	0.0405204	0.0563724	0.0589382	0.0422064	0.0102669	0.0430846	0.34875	3.1286	0.0120662	0.0844161	0.037245	1.07357
Q15762	CD226	CD226 antigen OS=Homo sapiens OX=9606 GN=CD226 PE=1 SV=2	-0.0352765	0.0352765	0.0222338	0.069281	0.133833	0.00356389	0.0338775	0.0297581	0.0837402	0.0871329	0.0933185	0.0636161	0.0416996	0.110106	0.0253764	0.122317	NA	NA	NA	NA	NA	NA	NA	NA	0.268551	4.86837	0.0121263	0.084753	0.0498329	1.07184
Q96DI7	SNRNP40	U5 small nuclear ribonucleoprotein 40 kDa protein OS=Homo sapiens OX=9606 GN=SNRNP40 PE=1 SV=1	0.0210777	-0.0210777	0.0513347	0.0308231	0.0432085	0.045387	0.0299678	0.0264597	0.0590449	0.0301644	0.0344616	0.0419512	0.0117366	0.0310714	0.0324117	0.0537937	0	0.0477541	-0.0129103	0.00167023	-0.0307174	-0.01921	0.00260721	0.00803084	0.530057	6.3	0.0121932	0.0851371	0.0372796	1.06988
P04839	CYBB	Cytochrome b-245 heavy chain OS=Homo sapiens OX=9606 GN=CYBB PE=1 SV=2	-0.0109183	0.0109183	-0.0720985	-0.0476129	0.0780657	0.0390955	-0.0273635	0.0288679	0.00391665	0.0776834	-0.000494956	-0.0323557	-0.122117	-0.00980367	-0.114906	-0.131533	0	0.0276471	0.368914	-0.18161	-0.0627713	-0.0520399	0.139706	0.118587	0.52996	3.55121	0.01221	0.0851671	-0.12859	1.06973
P56202	CTSW	Cathepsin W OS=Homo sapiens OX=9606 GN=CTSW PE=1 SV=2	0.0365073	-0.0365073	0.0337159	-0.0163271	0.00690568	0.021786	0.0525204	0.00807098	0.0720534	-0.0310286	-0.0394967	-0.0748587	-0.0490082	-0.0225733	-0.0545732	-0.26603	0	0.0190278	0.013775	-0.0506992	0.0588062	0.0375956	0.0434852	0.0580939	0.529894	3.22154	0.0122214	0.0851671	-0.159515	1.06973
Q9BZL6	PRKD2	Serine/threonine-protein kinase D2 OS=Homo sapiens OX=9606 GN=PRKD2 PE=1 SV=3	0.000294156	-0.000294156	0.0180849	0.0345593	-0.00922597	-0.00344364	0.0290477	0.00141531	0.0101369	0.0158679	-0.0474894	0.0395442	-0.0285642	-0.0613919	-0.051172	-0.0271946	0	0.04025	-0.00905202	-0.00323301	0.00207387	0.00360029	-0.0202002	-0.0131737	0.529671	3.94228	0.01226	0.0853524	-0.0501229	1.06878
[truncated: 6,099 more rows]

## Sheet: K562 Intact
Protein	Gene	Description	Control_0_1	Control_0_2	Control_0_3	Control_0_4	HODHBt_1000_1	HODHBt_1000_2	HODHBt_1000_3	HODHBt_1000_4	p.value_HODHBt	p_adj_HODHBt	effect_HODHBt	-Log10 p_adj
[truncated: 7,829 more rows]
