# Supplementary material for: The HIV latency reversing agent HODHBt inhibits the phosphatases PTPN1 and PTPN2
Source: JCI Insight. 2024 Aug 8;9(18):e179680. doi: 10.1172/jci.insight.179680 (PMC11457865; doi:10.1172/jci.insight.179680)
Supplement: Supplemental data set 2 [file jciinsight-9-179680-s105.xlsx]

## Sheet: Stabilized Proteins
PBMC Intact	K562 Intact
ADI1	AACS
AIF1	AGL
AKAP9	AIFM1
ALDH7A1	AKR1B1
ALYREF	ALDH2
AP1M1	ALKBH4
ARFGAP3	C19orf25
ARL2BP	CCDC124
ATF7-NPFF	CISD1
ATP5PF	CISD2
BAG1	COA6
BRD3OS	COMT
CCL8	CRKL
CD96	CRYZ
CDC34	CTBP1
CDC37	CTSL
CHST9	DUS1L
CIRBP	DUS2
CLIC2	DUS3L
CLU	DYNLRB1
CRKL	EMG1
CRTC1	ESS2
CYTH3	EXOSC2
DENND5A	F11R
DLST	FAHD2A
DNM1L	FAHD2B
DPH5	FGF2
DUS1L	GLG1
DUS3L	GMNN
EEA1	GSR
EMILIN2	GYG1
EPS15L1	GYS1
EVI5	HINT1
F5	HTD2
FAHD2A	ICAM1
FAM76A	KYAT1
FGB	LDHD
FGG	LSM6
FGR	MFGE8
GAA	MICOS13
GALNS	MRPS36
GCHFR	MXI1
GPD1L	NACA
HMGCS1	NAT1
HMGN3	NCBP2
HMGXB3	NDUFS4
HOOK2	NDUFS6
HSPD1	NEBL
HYPK	NENF
ILF3	NOL11
KHSRP	NPHP1
KIDINS220	NT5DC2
LUZP1	OR10A2
MAP1A	PEPD
MDP1	POLR3K
ME2	PPIP5K2
METTL25	PPP6C
MFAP1	PRDX2
MIB1	PSMB5
MRNIP	PSMD3
MYL9	PYGB
MYMK	PYGL
NAT1	RALA
NEK3	RBBP5
NKAP	RBM42
NMES1	RPL13A
PABPN1	RPL18A
PANK4	RPL30
PCTP	RPL35A
PDHA1	RPL37A
PDHB	RPS28
PEDS1-UBE2V1	RPS3
PHC2	RPS8
PIP4K2B	RTN1
POLR1D	SELENBP1
PRRC2B	SLC9A3R2
PSMG4	SNRPC
RANBP6	SNRPG
RASSF5	SPR
RIOK2	SRC
RNMT	TCP1
SCRIB	TIMM10
SEC61A1	TKT
SFXN3	TMLHE
SHB	TRIAP1
SHC1	TTL
SIGLEC1	TTLL8
SLMAP	TXNRD1
SMARCE1	TXNRD2
SPR	TYW5
TCEAL3	UBAP2L
TFG	UQCRB
TFPT	WBP11
THBS1	WDR73
THBS3	YES1
TMEM126A	ZNF541
TMPO
TSEN15
UBAP2L
UFM1
UQCC1
WASH2P
ZFP36
ZFYVE16

## Sheet: Destabilized Proteins
PBMC Intact	K562 Intact
AIMP2	AGPS
ANXA4	BDH2
ARHGAP26	BRAF
ASCC1	DCAF7
CA3	GFPT1
CANX	GPD1L
CD300A	GRB2
CD38	JAK1
CELF1	KIFC1
CNOT10	NHLRC3
CNOT8	NIPSNAP1
CNP	NIPSNAP2
COA5	OPHN1
COX17	PPFIA3
CPNE1	PTPN1
DDX5	PTPN2
DDX58	PTPRA
DENND3	QDPR
DOCK8	RRP12
DTX3L	STAT5A
EPRS1	UBE4A
FSTL1	UBR1
GFM1	VIRMA
GKAP1
GRHPR
GZMA
HADHA
IDH2
IFIH1
ILK
ISCU
MAPK4
MCCC1
MROH7
MRPL17
MX2
MYD88
MYO1G
NDRG1
NHLRC3
NIPSNAP1
NIPSNAP2
NUP88
OPA1
PARP10
PPP1CA
PPP1CB
PRG2
PTPN1
PTPN2
PTPRC
RAB21
RASGRP2
RPS6KA5
SCAMP2
SDHA
SEC23A
STAT1
STAT4
STX4
STXBP3
SUPV3L1
TAF2
TSFM
UBE2Q1
UFSP2
VDAC3
WAC
ZNF22

## Sheet: Common proteins
Stabilized
GENE	Aliases
CRKL	CRK Like Proto-Oncogene, Adaptor Protein
DUS1L	Dihydrouridine Synthase 1 Like
DUS3L	Dihydrouridine Synthase 3 Like
FAHD2A	Fumarylacetoacetate Hydrolase Domain Containing 2A
NAT1	N-Acetyltransferase 1
SPR	Sepiapterin Reductase
UBAP2L	Ubiquitin Associated Protein 2 Like
Destabilized
GENE	Aliases
NHLRC3	NHL Repeat Containing 3
NIPSNAP1	Nipsnap Homolog 1
NIPSNAP2	Nipsnap Homolog 2
PTPN1	Protein Tyrosine Phosphatase Non-Receptor Type 1
PTPN2	Protein Tyrosine Phosphatase Non-Receptor Type 2
