# Supplementary material for: The HIV latency reversing agent HODHBt inhibits the phosphatases PTPN1 and PTPN2
Source: JCI Insight. 2024 Aug 8;9(18):e179680. doi: 10.1172/jci.insight.179680 (PMC11457865; doi:10.1172/jci.insight.179680)
Supplement: Supplemental data set 3 [file jciinsight-9-179680-s106.xlsx]

## Sheet: string_interactions
node1	node2	node1_string_id	node2_string_id	neighborhood_on_chromosome	gene_fusion	phylogenetic_cooccurrence	homology	coexpression	experimentally_determined_interaction	database_annotated	automated_textmining	combined_score
CRKL	STAT5A	9606.ENSP00000346300	9606.ENSP00000341208	0	0	0	0	0	0.678	0	0.981	0.993
STAT5A	CRKL	9606.ENSP00000341208	9606.ENSP00000346300	0	0	0	0	0	0.678	0	0.981	0.993
PTPN1	STAT5A	9606.ENSP00000360683	9606.ENSP00000341208	0	0	0	0	0.066	0.365	0.9	0.549	0.969
STAT5A	PTPN1	9606.ENSP00000341208	9606.ENSP00000360683	0	0	0	0	0.066	0.365	0.9	0.549	0.969
PTPN2	STAT5A	9606.ENSP00000311857	9606.ENSP00000341208	0	0	0	0	0.066	0.29	0.9	0.585	0.968
STAT5A	PTPN2	9606.ENSP00000341208	9606.ENSP00000311857	0	0	0	0	0.066	0.29	0.9	0.585	0.968
GBAS	NIPSNAP1	9606.ENSP00000313050	9606.ENSP00000216121	0	0	0.443	0.971	0	0.676	0	0.904	0.688
NIPSNAP1	GBAS	9606.ENSP00000216121	9606.ENSP00000313050	0	0	0.443	0.971	0	0.676	0	0.904	0.688
CRKL	PTPN1	9606.ENSP00000346300	9606.ENSP00000360683	0	0	0	0	0.062	0	0	0.454	0.466
PTPN1	CRKL	9606.ENSP00000360683	9606.ENSP00000346300	0	0	0	0	0.062	0	0	0.454	0.466
DUS1L	DUS3L	9606.ENSP00000346280	9606.ENSP00000311977	0	0	0	0.596	0.156	0	0	0.845	0.442
DUS3L	DUS1L	9606.ENSP00000311977	9606.ENSP00000346280	0	0	0	0.596	0.156	0	0	0.845	0.442
